# Supplementary material for: Identification of Tea Plant Purple Acid Phosphatase Genes and Their Expression Responses to Excess Iron
Source: Int J Mol Sci. 2019 Apr 21;20(8):1954. doi: 10.3390/ijms20081954 (PMC6515233; doi:10.3390/ijms20081954)
Supplement: Supplementary file 1 [file ijms-20-01954-s001.zip]

Archive with 5 entries (5 files):
- Table S3.pdf
- ijms-489502 supplementary figures.pdf
- Supplementary Data set.xlsx
- Table S1.pdf
- Table S2.xlsx
