# Supplementary material for: Identification of Tea Plant Purple Acid Phosphatase Genes and Their Expression Responses to Excess Iron
Source: Int J Mol Sci. 2019 Apr 21;20(8):1954. doi: 10.3390/ijms20081954 (PMC6515233; doi:10.3390/ijms20081954)
Supplement: Supplementary file 1 [file ijms-20-01954-s001.zip › Supplementary Data set.xlsx]

## Sheet: annotated DEGs in leaves
Supplementary Data set. DEGs in response to excess iron in leaves, p<0.05, fold change>2
Gene_id	readcount_H_L	readcount_C_L	log2FoldChange	pval	padj	Gene Name	Blast swiss prot
CSA000008	166.49	71.1405	1.2267	0.0036996	0.021044	--	sp|F4I594|RLM1A_ARATH Disease resistance protein RML1A OS=Arabidopsis thaliana GN=RLM1A PE=3 SV=1//1.30858e-57
CSA000012	50.6944	9.54249	2.4094	0.00010895	0.0011518	--	sp|F4I9E1|NFD4_ARATH Protein NUCLEAR FUSION DEFECTIVE 4 OS=Arabidopsis thaliana GN=NFD4 PE=3 SV=1//1.01946e-157
CSA000018	73.1326	2.04157	5.1628	0.00024072	0.0022478	--	-//-
CSA000019	1943.61	55.5278	5.1294	1.5657e-06	2.8937e-05	--	sp|Q84MC2|LOG8_ARATH Cytokinin riboside 5&apos;-monophosphate phosphoribohydrolase LOG8 OS=Arabidopsis thaliana GN=LOG8 PE=1 SV=1//6.74385e-123
CSA000032	75.9723	19.4792	1.9635	0.00020847	0.0019911	--	sp|Q9LSI7|MYB35_ARATH Transcription factor MYB35 OS=Arabidopsis thaliana GN=MYB35 PE=2 SV=1//4.14865e-69
CSA000033	123.914	45.4635	1.4466	0.0011221	0.0080845	--	sp|Q8L970|P4H7_ARATH Probable prolyl 4-hydroxylase 7 OS=Arabidopsis thaliana GN=P4H7 PE=2 SV=1//5.83583e-102
CSA000039	0	31.6378	#NAME?	1.1398e-05	0.00016577	--	sp|Q9S7G2|GATL2_ARATH Probable galacturonosyltransferase-like 2 OS=Arabidopsis thaliana GN=GATL2 PE=2 SV=1//9.79091e-163
CSA000045	541.319	197.834	1.4522	8.8277e-05	0.00096259	--	sp|Q9FZ81|RBL12_ARATH RHOMBOID-like protein 12, mitochondrial OS=Arabidopsis thaliana GN=RBL12 PE=2 SV=1//8.34077e-91
CSA000052	1609.6	208.665	2.9474	2.0987e-13	1.5515e-11	--	sp|Q9FE20|PBS1_ARATH Serine/threonine-protein kinase PBS1 OS=Arabidopsis thaliana GN=PBS1 PE=1 SV=1//0
CSA000053	2229.68	316.146	2.8182	3.91e-14	3.2734e-12	--	sp|Q9C7S0|BZP60_ARATH bZIP transcription factor 60 OS=Arabidopsis thaliana GN=BZIP60 PE=1 SV=1//1.15323e-06
CSA000064	0.632768	32.1314	-5.6662	5.1773e-08	1.3965e-06	--	sp|F8WKW1|UGT2_GARJA 7-deoxyloganetin glucosyltransferase OS=Gardenia jasminoides GN=UGT85A24 PE=1 SV=1//0
CSA000077	0.632768	10.1796	-4.0079	0.0069951	0.034825	--	sp|Q6NMC6|ABIL3_ARATH Protein ABIL3 OS=Arabidopsis thaliana GN=ABIL3 PE=2 SV=1//2.63678e-56
CSA000078	0.986288	18.9119	-4.2611	0.00013125	0.0013486	--	sp|Q9M3A3|ABIL2_ARATH Protein ABIL2 OS=Arabidopsis thaliana GN=ABIL2 PE=2 SV=1//1.71619e-46
CSA000080	24.842	86.4529	-1.7991	0.00030861	0.0027657	--	-//-
CSA000082	1044.35	8748.07	-3.0664	2.2034e-16	2.4834e-14	--	sp|P31336|PST2_GOSHI Photosystem II 5 kDa protein, chloroplastic OS=Gossypium hirsutum GN=PSBT PE=4 SV=1//3.08504e-18
CSA000094	234.054	779.788	-1.7362	0.002941	0.017577	--	sp|C0LGH3|Y5614_ARATH Probable LRR receptor-like serine/threonine-protein kinase At1g56140 OS=Arabidopsis thaliana GN=At1g56140 PE=2 SV=2//0
CSA000095	162.707	38.7485	2.0701	3.3183e-05	0.00041459	--	sp|O04251|Y4211_ARATH BRCT domain-containing protein At4g02110 OS=Arabidopsis thaliana GN=At4g02110 PE=3 SV=3//1.10551e-88
CSA000099	701.285	3.07027	7.8355	1.3959e-16	1.6367e-14	--	sp|Q7PC87|AB34G_ARATH ABC transporter G family member 34 OS=Arabidopsis thaliana GN=ABCG34 PE=2 SV=1//1.79651e-134
CSA000101	505.132	1264.46	-1.3238	0.00026908	0.0024652	--	sp|P37107|SR54C_ARATH Signal recognition particle 54 kDa protein, chloroplastic OS=Arabidopsis thaliana GN=FFC PE=1 SV=1//0
CSA000102	146.791	407.955	-1.4746	0.00011955	0.0012424	--	sp|P37107|SR54C_ARATH Signal recognition particle 54 kDa protein, chloroplastic OS=Arabidopsis thaliana GN=FFC PE=1 SV=1//7.97504e-43
CSA000106	2703.72	6117.64	-1.178	0.00072589	0.0056548	--	sp|F4IDI6|BRG2_ARATH Probable BOI-related E3 ubiquitin-protein ligase 2 OS=Arabidopsis thaliana GN=BRG2 PE=1 SV=1//3.2747e-10
CSA000107	3730.86	33821	-3.1803	1.1537e-17	1.5676e-15	--	sp|P46486|PSAF_FLATR Photosystem I reaction center subunit III, chloroplastic OS=Flaveria trinervia GN=PSAF PE=2 SV=1//3.46558e-91
CSA000111	1535.02	613.203	1.3238	0.00019622	0.0018948	--	sp|P31582|RAF2A_ARATH Ras-related protein RABF2a OS=Arabidopsis thaliana GN=RABF2A PE=1 SV=1//8.07951e-115
CSA000114	380.292	72.5371	2.3903	3.0599e-09	1.0677e-07	--	sp|Q9SHF3|AGO2_ARATH Protein argonaute 2 OS=Arabidopsis thaliana GN=AGO2 PE=1 SV=1//0
CSA000116	23.6583	3.00839	2.9753	0.010401	0.047536	--	sp|O04609|WRK22_ARATH WRKY transcription factor 22 OS=Arabidopsis thaliana GN=WRKY22 PE=2 SV=1//9.88442e-34
CSA000133	52.6914	310.539	-2.5591	0.0024299	0.015078	--	sp|Q50228|FMDA_METME Formamidase OS=Methylophilus methylotrophus GN=fmdA PE=1 SV=1//3.07591e-13
CSA000134	2.84746	23.5505	-3.048	0.00069585	0.0054657	--	sp|Q50228|FMDA_METME Formamidase OS=Methylophilus methylotrophus GN=fmdA PE=1 SV=1//7.57124e-23
CSA000136	1.37694	16.6189	-3.5933	0.0010101	0.0074293	--	sp|Q50228|FMDA_METME Formamidase OS=Methylophilus methylotrophus GN=fmdA PE=1 SV=1//5.09297e-41
CSA000137	3.20052	25.5039	-2.9943	0.0004839	0.0040446	--	sp|Q50228|FMDA_METME Formamidase OS=Methylophilus methylotrophus GN=fmdA PE=1 SV=1//1.30872e-15
CSA000139	491.291	1867.65	-1.9266	8.175e-08	2.1124e-06	--	sp|Q9C942|CSE_ARATH Caffeoylshikimate esterase OS=Arabidopsis thaliana GN=CSE PE=1 SV=1//6.14507e-41
CSA000140	1694.68	814.035	1.0579	0.0031414	0.018539	--	-//-
CSA000141	46.9099	201.287	-2.1013	5.5708e-07	1.156e-05	--	sp|Q84MB3|ACCH1_ARATH 1-aminocyclopropane-1-carboxylate oxidase homolog 1 OS=Arabidopsis thaliana GN=At1g06620 PE=2 SV=1//5.66296e-140
CSA000146	1557.05	85.8571	4.1807	7.0368e-12	4.0069e-10	--	sp|Q6AWW5|Y5262_ARATH Ankyrin repeat-containing protein At5g02620 OS=Arabidopsis thaliana GN=At5g02620 PE=1 SV=1//9.04085e-14
CSA000151	10803	314.994	5.1	2.05e-13	1.5232e-11	--	sp|Q9SHF3|AGO2_ARATH Protein argonaute 2 OS=Arabidopsis thaliana GN=AGO2 PE=1 SV=1//0
CSA000166	426.956	1541.78	-1.8524	3.3121e-07	7.2815e-06	--	sp|Q6SZ87|NAT11_ARATH Nucleobase-ascorbate transporter 11 OS=Arabidopsis thaliana GN=NAT11 PE=2 SV=1//0
CSA000172	2127.98	4293.06	-1.0125	0.0038665	0.021778	--	sp|O24496|GLO2C_ARATH Hydroxyacylglutathione hydrolase cytoplasmic OS=Arabidopsis thaliana GN=GLX2-2 PE=1 SV=2//4.31312e-141
CSA000176	217.564	488.108	-1.1658	0.0014944	0.010215	--	sp|Q9LFP7|Y5158_ARATH Probable receptor-like protein kinase At5g15080 OS=Arabidopsis thaliana GN=At5g15080 PE=2 SV=1//1.21609e-139
CSA000177	97.5258	223.129	-1.194	0.0025832	0.015836	--	sp|Q9LFP7|Y5158_ARATH Probable receptor-like protein kinase At5g15080 OS=Arabidopsis thaliana GN=At5g15080 PE=2 SV=1//3.83208e-52
CSA000184	433.049	70.6422	2.6159	5.5877e-11	2.6694e-09	--	sp|P35130|UBC2_MEDSA Ubiquitin-conjugating enzyme E2 2 OS=Medicago sativa GN=UBC2 PE=2 SV=1//8.59177e-10
CSA000185	18.3286	2.74052	2.7416	0.0042566	0.023531	--	sp|P25866|UBC2_WHEAT Ubiquitin-conjugating enzyme E2 2 OS=Triticum aestivum GN=UBC2 PE=1 SV=1//1.77827e-06
CSA000186	311.276	52.7788	2.5602	5.9418e-10	2.3755e-08	--	sp|P35130|UBC2_MEDSA Ubiquitin-conjugating enzyme E2 2 OS=Medicago sativa GN=UBC2 PE=2 SV=1//8.05193e-29
CSA000187	1133.1	366.26	1.6293	5.5536e-06	8.8795e-05	--	sp|Q8LGJ5|PCO2_ARATH Plant cysteine oxidase 2 OS=Arabidopsis thaliana GN=PCO2 PE=1 SV=1//2.61814e-105
CSA000188	102.563	294.76	-1.523	0.0023547	0.014714	--	sp|Q9SX20|PTR18_ARATH Protein NRT1/ PTR FAMILY 3.1 OS=Arabidopsis thaliana GN=NPF3.1 PE=2 SV=1//2.09466e-83
CSA000194	568.237	180.821	1.6519	9.9915e-06	0.00014853	--	sp|Q8RV04|TI141_ARATH Mitochondrial import inner membrane translocase subunit TIM14-1 OS=Arabidopsis thaliana GN=TIM14-1 PE=1 SV=1//2.88437e-47
CSA000212	38.6497	144.304	-1.9006	5.1019e-05	0.00060159	--	-//-
CSA000213	8.05723	42.03	-2.3831	0.00023803	0.0022274	--	-//-
CSA000214	25.3074	126.239	-2.3185	0.00088208	0.0066472	--	-//-
CSA000215	29.875	116.058	-1.9578	0.0075281	0.036927	--	-//-
CSA000216	27.7911	85.6849	-1.6244	0.0007789	0.0060024	--	-//-
CSA000217	17.23	1.63813	3.3948	0.0017692	0.011678	--	sp|Q9LFD2|LAC8_ARATH Laccase-8 OS=Arabidopsis thaliana GN=LAC8 PE=2 SV=1//2.32762e-86
CSA000221	110.412	14.9978	2.8801	0.0030831	0.018246	--	sp|Q9C9H7|RLP12_ARATH Receptor-like protein 12 OS=Arabidopsis thaliana GN=RLP12 PE=2 SV=2//2.48312e-13
CSA000224	268.146	133.203	1.0094	0.010381	0.047468	--	-//-
CSA000231	932.001	3364.87	-1.8521	3.6216e-06	6.0802e-05	--	sp|Q94K71|GPPL2_ARATH Haloacid dehalogenase-like hydrolase domain-containing protein At3g48420 OS=Arabidopsis thaliana GN=At3g48420 PE=1 SV=1//1.0951e-151
CSA000235	232.171	103.25	1.169	0.0097817	0.045248	--	-//-
CSA000241	3151.47	20.2334	7.2831	6.4393e-06	0.00010092	--	sp|Q84VX0|RFS1_ARATH Probable galactinol--sucrose galactosyltransferase 1 OS=Arabidopsis thaliana GN=RFS1 PE=2 SV=1//0
CSA000249	212.103	54.7249	1.9545	3.7987e-06	6.3312e-05	--	sp|P38389|SC61B_ARATH Protein transport protein Sec61 subunit beta OS=Arabidopsis thaliana GN=At2g45070 PE=1 SV=1//5.36243e-21
CSA000255	86.0419	360.727	-2.0678	1.1294e-07	2.7878e-06	--	sp|Q6AT26|CESA1_ORYSJ Probable cellulose synthase A catalytic subunit 1 [UDP-forming] OS=Oryza sativa subsp. japonica GN=CESA1 PE=2 SV=1//7.20375e-55
CSA000257	218.843	70.0742	1.6429	0.0050197	0.026858	--	sp|F4I9E1|NFD4_ARATH Protein NUCLEAR FUSION DEFECTIVE 4 OS=Arabidopsis thaliana GN=NFD4 PE=3 SV=1//7.57897e-50
CSA000258	2553.8	47.8822	5.737	1.2001e-36	1.4147e-33	--	-//-
CSA000260	7758.27	3689.26	1.0724	0.0018869	0.012309	--	sp|Q9LRX8|R13A2_ARATH 60S ribosomal protein L13a-2 OS=Arabidopsis thaliana GN=RPL13AB PE=1 SV=1//3.85126e-134
CSA000284	104.366	2.02841	5.6852	1.72e-05	0.00023621	--	sp|P0C5E2|Y1839_ARATH Probable serine/threonine-protein kinase At1g18390 OS=Arabidopsis thaliana GN=At1g18390 PE=2 SV=2//1.83752e-155
CSA000285	20.2626	0.356056	5.8306	0.0066298	0.033386	--	-//-
CSA000292	208.439	102.358	1.026	0.010756	0.048778	--	-//-
CSA000306	12877.5	2149.94	2.5825	3.5299e-08	9.9075e-07	--	sp|P27322|HSP72_SOLLC Heat shock cognate 70 kDa protein 2 OS=Solanum lycopersicum GN=HSC-2 PE=2 SV=1//0
CSA000313	2602.66	1239.67	1.07	0.002036	0.013088	--	-//-
CSA000317	117.253	584.513	-2.3176	0.00011798	0.0012281	--	sp|P73068|RUBR_SYNY3 Rubredoxin OS=Synechocystis sp. (strain PCC 6803 / Kazusa) GN=rub PE=3 SV=1//7.36721e-16
CSA000323	40.8239	12.4304	1.7155	0.0062917	0.03204	--	-//-
CSA000325	21.3614	95.4992	-2.1605	1.4919e-05	0.0002085	--	-//-
CSA000326	5075.29	11045.4	-1.1219	0.0012397	0.0087937	--	sp|A2YQ93|PRR37_ORYSI Two-component response regulator-like PRR37 OS=Oryza sativa subsp. indica GN=PRR37 PE=2 SV=2//1.45206e-93
CSA000330	10.4393	47.7835	-2.1945	0.0003067	0.0027537	--	sp|Q94KB2|MLO13_ARATH MLO-like protein 13 OS=Arabidopsis thaliana GN=MLO13 PE=2 SV=1//1.60469e-117
CSA000331	140.937	525.15	-1.8977	2.2602e-05	0.00029772	--	sp|Q55909|Y305_SYNY3 TVP38/TMEM64 family membrane protein slr0305 OS=Synechocystis sp. (strain PCC 6803 / Kazusa) GN=slr0305 PE=3 SV=1//1.26827e-07
CSA000332	589.493	1955.91	-1.7303	9.9131e-07	1.9208e-05	--	sp|P0C1U4|GUN9_ORYSJ Endoglucanase 9 OS=Oryza sativa subsp. japonica GN=GLU1 PE=2 SV=1//0
CSA000333	125.657	489.842	-1.9628	2.5713e-07	5.8049e-06	--	sp|Q38890|GUN25_ARATH Endoglucanase 25 OS=Arabidopsis thaliana GN=KOR PE=1 SV=1//2.9513e-59
CSA000334	1365.72	537.387	1.3456	0.00015815	0.0015811	--	sp|Q680P8|RS29_ARATH 40S ribosomal protein S29 OS=Arabidopsis thaliana GN=RPS29A PE=3 SV=2//6.36755e-29
CSA000335	0.316384	26.3614	-6.3806	0.0078105	0.037978	--	sp|P33081|AX15A_SOYBN Auxin-induced protein 15A OS=Glycine max PE=2 SV=1//1.25628e-19
CSA000346	8.44789	55.5714	-2.7177	0.00020927	0.0019977	--	sp|Q9SG02|RDR6_ARATH RNA-dependent RNA polymerase 6 OS=Arabidopsis thaliana GN=RDR6 PE=1 SV=1//0
CSA000355	4.6052	38.0772	-3.0476	2.441e-05	0.00031849	--	-//-
CSA000358	277.357	115.681	1.2616	0.0015976	0.01077	--	-//-
CSA000360	2383.52	267.965	3.153	1.3889e-12	9.2067e-11	--	sp|Q6L403|R1B17_SOLDE Putative late blight resistance protein homolog R1B-17 OS=Solanum demissum GN=R1B-17 PE=3 SV=1//3.07223e-87
CSA000361	1624.1	198.535	3.0322	1.1034e-15	1.1167e-13	--	sp|Q8W3K3|DRL8_ARATH Putative disease resistance protein At1g58400 OS=Arabidopsis thaliana GN=At1g58400 PE=3 SV=1//7.47645e-61
CSA000366	537.93	121.06	2.1517	3.1608e-08	8.9521e-07	--	sp|Q10S93|KAD1_ORYSJ Probable adenylate kinase 1, chloroplastic OS=Oryza sativa subsp. japonica GN=Os03g0130400 PE=2 SV=1//1.92291e-127
CSA000370	228.208	19.3225	3.562	2.9595e-14	2.5311e-12	--	sp|Q9ZPE7|EXO_ARATH Protein EXORDIUM OS=Arabidopsis thaliana GN=EXO PE=2 SV=1//4.30937e-148
CSA000374	1229.13	444.6	1.4671	0.00016621	0.0016476	--	sp|Q9FZ99|SMG7L_ARATH Protein SMG7L OS=Arabidopsis thaliana GN=SMG7L PE=2 SV=1//9.19437e-149
CSA000375	35.2056	3.82185	3.2035	2.3222e-05	0.00030474	--	sp|Q8GYA4|CRK10_ARATH Cysteine-rich receptor-like protein kinase 10 OS=Arabidopsis thaliana GN=CRK10 PE=1 SV=3//2.57688e-141
CSA000378	1.06056	11.6249	-3.4543	0.0063111	0.03212	--	-//-
CSA000385	32.5543	3.07684	3.4033	0.0006417	0.0051168	--	-//-
CSA000408	748.509	358.741	1.0611	0.0027638	0.016719	--	sp|Q9LND7|SKI16_ARATH F-box protein SKIP16 OS=Arabidopsis thaliana GN=SKIP16 PE=1 SV=1//1.14261e-138
CSA000411	275.172	54.0471	2.348	0.00066019	0.0052384	--	sp|Q39214|RPM1_ARATH Disease resistance protein RPM1 OS=Arabidopsis thaliana GN=RPM1 PE=1 SV=1//9.66824e-38
CSA000412	7.53637	330.786	-5.4559	0.010062	0.04629	--	sp|Q9SFC6|GDIR_ARATH Rho GDP-dissociation inhibitor 1 OS=Arabidopsis thaliana GN=GDI1 PE=1 SV=1//1.27986e-80
CSA000429	4.67993	51.0038	-3.446	0.00068671	0.0054036	--	-//-
CSA000430	5.20129	91.9018	-4.1432	0.0090623	0.042603	--	sp|Q9S7X6|ACL5_ARATH Thermospermine synthase ACAULIS5 OS=Arabidopsis thaliana GN=ACL5 PE=1 SV=1//2.31366e-35
CSA000434	115.662	48.6687	1.2488	0.0049078	0.026392	--	sp|Q9SFU6|CALS9_ARATH Callose synthase 9 OS=Arabidopsis thaliana GN=CALS9 PE=2 SV=2//2.62745e-08
CSA000439	246.906	115.701	1.0936	0.0055034	0.028855	--	sp|Q9SFU6|CALS9_ARATH Callose synthase 9 OS=Arabidopsis thaliana GN=CALS9 PE=2 SV=2//7.5349e-63
CSA000441	332.669	157.533	1.0784	0.004668	0.025403	--	sp|Q9SFU6|CALS9_ARATH Callose synthase 9 OS=Arabidopsis thaliana GN=CALS9 PE=2 SV=2//5.02041e-68
CSA000444	13.5562	127.565	-3.2342	3.2039e-10	1.3476e-08	--	sp|Q8LAP6|PAP12_ARATH Probable plastid-lipid-associated protein 12, chloroplastic OS=Arabidopsis thaliana GN=PAP12 PE=2 SV=1//8.65516e-16
CSA000445	15.799	247.858	-3.9716	5.873e-17	7.2362e-15	--	sp|Q8LAP6|PAP12_ARATH Probable plastid-lipid-associated protein 12, chloroplastic OS=Arabidopsis thaliana GN=PAP12 PE=2 SV=1//2.14232e-81
CSA000448	2.23303	25.9672	-3.5396	8.3593e-05	0.0009191	--	sp|Q8LAP6|PAP12_ARATH Probable plastid-lipid-associated protein 12, chloroplastic OS=Arabidopsis thaliana GN=PAP12 PE=2 SV=1//8.41955e-13
CSA000453	124.35	4.50436	4.7869	1.5656e-05	0.00021734	--	sp|Q9SY95|Y1155_ARATH G-type lectin S-receptor-like serine/threonine-protein kinase At1g61550 OS=Arabidopsis thaliana GN=At1g61550 PE=2 SV=1//5.43844e-106
CSA000454	148.319	20.546	2.8518	1.8029e-09	6.5806e-08	--	sp|O64781|Y1639_ARATH G-type lectin S-receptor-like serine/threonine-protein kinase At1g61390 OS=Arabidopsis thaliana GN=At1g61390 PE=2 SV=1//1.50154e-135
CSA000455	4.55912	64.0773	-3.813	3.7376e-09	1.2803e-07	--	sp|O81906|B120_ARATH G-type lectin S-receptor-like serine/threonine-protein kinase B120 OS=Arabidopsis thaliana GN=B120 PE=2 SV=1//1.3369e-47
CSA000456	11.7608	144.958	-3.6236	1.1125e-12	7.4996e-11	--	sp|O64782|SD129_ARATH G-type lectin S-receptor-like serine/threonine-protein kinase SD1-29 OS=Arabidopsis thaliana GN=SD129 PE=1 SV=1//5.38411e-104
CSA000461	0	10.6844	#NAME?	0.00055966	0.0045653	--	sp|Q9LSB1|GUX1_ARATH UDP-glucuronate:xylan alpha-glucuronosyltransferase 1 OS=Arabidopsis thaliana GN=GUX1 PE=2 SV=1//0
CSA000469	80.9088	17.2533	2.2294	0.00073929	0.0057407	--	sp|Q5PP62|SPX3_ARATH SPX domain-containing protein 3 OS=Arabidopsis thaliana GN=SPX3 PE=2 SV=1//5.53471e-98
CSA000470	189.815	46.3816	2.033	0.0030147	0.017932	--	sp|Q5PP62|SPX3_ARATH SPX domain-containing protein 3 OS=Arabidopsis thaliana GN=SPX3 PE=2 SV=1//1.58519e-99
CSA000480	2103.83	4395.98	-1.0632	0.0037743	0.021371	--	sp|P36688|RK12_NICSY 50S ribosomal protein L12, chloroplastic OS=Nicotiana sylvestris PE=2 SV=1//5.8115e-48
CSA000484	163.19	686.742	-2.0732	3.0564e-08	8.6816e-07	--	sp|Q41058|GLGB1_PEA 1,4-alpha-glucan-branching enzyme 1, chloroplastic/amyloplastic OS=Pisum sativum GN=SBEI PE=1 SV=1//0
CSA000488	36.6847	171.74	-2.227	4.7166e-07	9.9623e-06	--	sp|Q41058|GLGB1_PEA 1,4-alpha-glucan-branching enzyme 1, chloroplastic/amyloplastic OS=Pisum sativum GN=SBEI PE=1 SV=1//6.95465e-121
CSA000490	69.985	260.03	-1.8936	3.2874e-06	5.5705e-05	--	sp|Q41058|GLGB1_PEA 1,4-alpha-glucan-branching enzyme 1, chloroplastic/amyloplastic OS=Pisum sativum GN=SBEI PE=1 SV=1//8.12098e-55
CSA000508	17.2502	105.962	-2.6189	2.4715e-07	5.6145e-06	--	sp|F8WKW1|UGT2_GARJA 7-deoxyloganetin glucosyltransferase OS=Gardenia jasminoides GN=UGT85A24 PE=1 SV=1//5.50505e-95
CSA000510	167.111	1.59074	6.715	2.615e-18	3.8795e-16	--	sp|O80436|PTR29_ARATH Protein NRT1/ PTR FAMILY 5.5 OS=Arabidopsis thaliana GN=NPF5.5 PE=2 SV=1//6.9288e-19
CSA000511	54.74	1.37684	5.3132	0.00088628	0.0066718	--	sp|O80436|PTR29_ARATH Protein NRT1/ PTR FAMILY 5.5 OS=Arabidopsis thaliana GN=NPF5.5 PE=2 SV=1//2.13417e-08
CSA000513	47.4032	210.167	-2.1485	3.7569e-07	8.1483e-06	--	sp|Q9LTB2|MMT1_ARATH Methionine S-methyltransferase OS=Arabidopsis thaliana GN=MMT1 PE=1 SV=1//0
CSA000517	2020.72	841.673	1.2635	0.00038957	0.0033801	--	sp|Q94CA0|LAZH1_ARATH Protein LAZ1 homolog 1 OS=Arabidopsis thaliana GN=At1g77220 PE=2 SV=1//0
CSA000518	92.4515	32.6211	1.5029	0.001282	0.0090353	--	-//-
CSA000523	0.660506	10.2237	-3.9522	0.007696	0.037611	--	sp|Q8GWW4|GUX2_ARATH UDP-glucuronate:xylan alpha-glucuronosyltransferase 2 OS=Arabidopsis thaliana GN=GUX2 PE=2 SV=1//0
CSA000534	480.301	29.1697	4.0414	2.4169e-11	1.249e-09	--	sp|Q39214|RPM1_ARATH Disease resistance protein RPM1 OS=Arabidopsis thaliana GN=RPM1 PE=1 SV=1//2.45339e-138
CSA000543	180.224	56.5434	1.6724	0.0048078	0.025969	--	sp|Q9LSQ6|PBP1_ARATH Calcium-binding protein PBP1 OS=Arabidopsis thaliana GN=PBP1 PE=1 SV=1//4.09871e-33
CSA000560	12.2168	43.1765	-1.8214	0.0029711	0.017733	--	-//-
CSA000561	38.6299	105.111	-1.4441	0.0015291	0.010402	--	sp|Q67XL4|Y3544_ARATH Uncharacterized CRM domain-containing protein At3g25440, chloroplastic OS=Arabidopsis thaliana GN=At3g25440 PE=2 SV=1//2.45196e-115
CSA000567	0.306986	12.8793	-5.3907	0.00055006	0.0045004	--	-//-
CSA000570	405.584	182.412	1.1528	0.0021326	0.013597	--	sp|Q9C9M6|ASF1A_ARATH Probable histone chaperone ASF1A OS=Arabidopsis thaliana GN=ASF1A PE=2 SV=1//1.98227e-76
CSA000578	0.306986	13.6092	-5.4703	0.0031638	0.01862	--	sp|O02414|DYL1_HELCR Dynein light chain LC6, flagellar outer arm OS=Heliocidaris crassispina PE=3 SV=1//6.29532e-15
CSA000588	88.685	190.916	-1.1062	0.0069164	0.034512	--	sp|B6ZJZ9|PNC1_SOYBN Peroxisomal adenine nucleotide carrier 1 OS=Glycine max GN=PNC1 PE=2 SV=1//3.9774e-102
CSA000604	7.29517	52.1958	-2.8389	0.0029388	0.017566	--	sp|Q6XKE6|POLG_PVCV2 Genome polyprotein OS=Petunia vein clearing virus (isolate Hohn) PE=3 SV=1//1.43649e-07
CSA000605	260.339	528.359	-1.0211	0.0044873	0.02457	--	sp|P28582|CDPK_DAUCA Calcium-dependent protein kinase OS=Daucus carota PE=2 SV=2//0
CSA000607	559.314	274.495	1.0269	0.004735	0.025665	--	sp|Q9CAA7|PUB42_ARATH Putative U-box domain-containing protein 42 OS=Arabidopsis thaliana GN=PUB42 PE=2 SV=1//2.10088e-27
CSA000615	304.025	144.586	1.0723	0.0041386	0.02301	--	sp|Q7XZU3|SAC1_ARATH Phosphoinositide phosphatase SAC1 OS=Arabidopsis thaliana GN=SAC1 PE=1 SV=1//6.76858e-16
CSA000621	72.633	24.1251	1.5901	0.0021734	0.013804	--	sp|F4I8B9|Y1501_ARATH Putative WEB family protein At1g65010, chloroplastic OS=Arabidopsis thaliana GN=At1g65010 PE=1 SV=1//2.39777e-26
CSA000625	62.3202	337.381	-2.4366	7.8726e-06	0.00012045	--	sp|Q94A73|Y5656_ARATH BTB/POZ domain-containing protein At5g66560 OS=Arabidopsis thaliana GN=At5g66560 PE=2 SV=2//0
CSA000627	15346	77481.6	-2.336	1.3811e-08	4.2481e-07	--	sp|P23322|PSBO_SOLLC Oxygen-evolving enhancer protein 1, chloroplastic OS=Solanum lycopersicum GN=PSBO PE=2 SV=2//0
CSA000634	313.484	1063.22	-1.762	1.5026e-06	2.7936e-05	--	sp|P67064|MENG_TROWT Demethylmenaquinone methyltransferase OS=Tropheryma whipplei (strain Twist) GN=menG PE=3 SV=1//1.41267e-08
CSA000641	0.70704	19.9965	-4.8218	4.2439e-05	0.00051347	--	sp|B5X8M4|BRCC3_SALSA Lys-63-specific deubiquitinase BRCC36 OS=Salmo salar GN=brcc3 PE=2 SV=1//1.47539e-13
CSA000642	17.3147	85.5731	-2.3052	0.0035557	0.020425	--	sp|Q5R9L6|BRCC3_PONAB Lys-63-specific deubiquitinase BRCC36 OS=Pongo abelii GN=BRCC3 PE=2 SV=1//1.00866e-26
CSA000650	2644.98	87.9554	4.9103	2.0124e-10	8.804e-09	--	sp|Q9LSQ6|PBP1_ARATH Calcium-binding protein PBP1 OS=Arabidopsis thaliana GN=PBP1 PE=1 SV=1//2.88194e-34
CSA000656	509.936	1048.56	-1.04	0.0033508	0.019471	--	sp|Q940H7|MES12_ARATH Putative methylesterase 12, chloroplastic OS=Arabidopsis thaliana GN=MES12 PE=2 SV=1//2.36066e-180
CSA000657	31238.4	7436.38	2.0706	3.6432e-09	1.2522e-07	--	sp|P29448|TRXH1_ARATH Thioredoxin H1 OS=Arabidopsis thaliana GN=TRX1 PE=1 SV=1//7.48646e-40
CSA000660	7573.98	2821.36	1.4247	3.786e-05	0.00046387	--	sp|Q9ZR41|GLRX_SOLLC Glutaredoxin OS=Solanum lycopersicum PE=3 SV=1//1.12565e-49
CSA000662	97.7769	298.526	-1.6103	4.6831e-05	0.00055947	--	sp|O29470|Y788_ARCFU Uncharacterized transporter AF_0788 OS=Archaeoglobus fulgidus (strain ATCC 49558 / VC-16 / DSM 4304 / JCM 9628 / NBRC 100126) GN=AF_0788 PE=3 SV=1//2.74968e-06
CSA000664	6.32672	59.0148	-3.2215	0.0092029	0.043115	--	sp|Q9SA69|Y1301_ARATH BTB/POZ domain-containing protein At1g03010 OS=Arabidopsis thaliana GN=At1g03010 PE=2 SV=1//0
CSA000666	389.208	95.2103	2.0314	3.1267e-05	0.00039427	--	sp|O22259|ERF71_ARATH Ethylene-responsive transcription factor ERF071 OS=Arabidopsis thaliana GN=ERF071 PE=2 SV=1//9.85111e-27
CSA000673	351.332	719.907	-1.035	0.0047043	0.025556	--	sp|Q8W463|RK191_ARATH 50S ribosomal protein L19-1, chloroplastic OS=Arabidopsis thaliana GN=At4g17560 PE=2 SV=1//2.15381e-22
CSA000674	374.079	783.644	-1.0669	0.0033313	0.019389	--	-//-
CSA000693	17.5769	253.674	-3.8512	0.002194	0.013917	--	sp|Q9LLL8|SBT4E_ARATH Subtilisin-like protease SBT4.14 OS=Arabidopsis thaliana GN=SBT4.14 PE=2 SV=1//0
CSA000714	374.796	18.6315	4.3303	1.3606e-21	3.3081e-19	--	-//-
CSA000715	1021.76	402.899	1.3426	0.0001983	0.0019123	--	sp|Q39214|RPM1_ARATH Disease resistance protein RPM1 OS=Arabidopsis thaliana GN=RPM1 PE=1 SV=1//2.95226e-14
CSA000721	27.195	178.311	-2.713	4.0613e-08	1.1254e-06	--	sp|Q8C080|SNX16_MOUSE Sorting nexin-16 OS=Mus musculus GN=Snx16 PE=1 SV=2//4.79436e-10
CSA000738	342.165	1158.03	-1.7589	0.0029263	0.017509	--	sp|Q7Z494|NPHP3_HUMAN Nephrocystin-3 OS=Homo sapiens GN=NPHP3 PE=1 SV=1//2.04051e-09
CSA000743	634.759	151.117	2.0705	4.521e-08	1.241e-06	--	sp|Q9FZF1|PX11A_ARATH Peroxisomal membrane protein 11A OS=Arabidopsis thaliana GN=PEX11A PE=1 SV=1//5.81408e-115
CSA000747	49.6277	164.787	-1.7314	5.0549e-05	0.00059719	--	sp|Q93VG8|PPDEX_ARATH DeSI-like protein At4g17486 OS=Arabidopsis thaliana GN=At4g17486 PE=2 SV=1//4.52534e-67
CSA000757	1741.72	450.869	1.9497	8.9148e-08	2.2726e-06	--	sp|Q9SRE4|UGAL2_ARATH UDP-galactose transporter 2 OS=Arabidopsis thaliana GN=UDP-GALT2 PE=2 SV=1//6.89666e-157
CSA000765	133.548	702.373	-2.3949	7.2589e-06	0.00011219	--	sp|Q9M2Y6|Y3972_ARATH Uncharacterized protein At3g49720 OS=Arabidopsis thaliana GN=At3g49720 PE=2 SV=1//3.61822e-109
CSA000766	16.1614	82.8213	-2.3574	6.0049e-06	9.4966e-05	--	-//-
CSA000768	726.665	243.778	1.5757	2.2404e-05	0.00029567	--	sp|Q8LGB6|ZED1_ARATH Non-functional pseudokinase ZED1 OS=Arabidopsis thaliana GN=ZED1 PE=1 SV=1//2.29915e-62
CSA000770	40.6589	6.80063	2.5798	0.00017163	0.0016914	--	-//-
CSA000776	1857.85	658.401	1.4966	2.1398e-05	0.00028403	--	sp|Q9STN3|SPT51_ARATH Putative transcription elongation factor SPT5 homolog 1 OS=Arabidopsis thaliana GN=At4g08350 PE=1 SV=2//0
CSA000777	323.858	120.755	1.4233	0.00020373	0.0019534	--	-//-
CSA000779	3801.01	111.622	5.0897	3.4398e-18	5.0011e-16	--	sp|Q8LEE7|AOX3_ARATH Ubiquinol oxidase 3, mitochondrial OS=Arabidopsis thaliana GN=AOX3 PE=2 SV=2//1.46092e-123
CSA000780	1.24674	50.6188	-5.3434	1.6215e-10	7.18e-09	--	-//-
CSA000781	40.6956	214.51	-2.3981	2.8794e-08	8.2571e-07	--	-//-
CSA000795	4582.04	22989.9	-2.3269	1.3348e-05	0.00019033	--	sp|P26302|KPPR_WHEAT Phosphoribulokinase, chloroplastic OS=Triticum aestivum PE=2 SV=1//0
CSA000797	521.199	3000.23	-2.5252	9.2311e-12	5.1291e-10	--	sp|Q9FVQ4|PLGG1_ARATH Plastidal glycolate/glycerate translocator 1, chloroplastic OS=Arabidopsis thaliana GN=PLGG1 PE=2 SV=1//0
CSA000810	1023.08	317.737	1.687	0.00026383	0.0024257	--	-//-
CSA000835	30.0715	160.249	-2.4138	2.4697e-05	0.00032169	--	sp|Q8LPL5|FZR3_ARATH Protein FIZZY-RELATED 3 OS=Arabidopsis thaliana GN=FZR3 PE=1 SV=1//0
CSA000837	135.104	360.665	-1.4166	0.004455	0.024411	--	sp|O80933|SCL9_ARATH Scarecrow-like protein 9 OS=Arabidopsis thaliana GN=SCL9 PE=2 SV=1//0
CSA000858	946.604	366.02	1.3708	0.00017173	0.0016916	--	sp|Q9LTB0|EX84B_ARATH Exocyst complex component EXO84B OS=Arabidopsis thaliana GN=EXO84B PE=1 SV=1//0
CSA000859	452.516	96.2422	2.2332	0.0029937	0.017841	--	sp|Q9C5V5|GLR28_ARATH Glutamate receptor 2.8 OS=Arabidopsis thaliana GN=GLR2.8 PE=2 SV=2//0
CSA000860	5562.68	860.926	2.6918	0.0062755	0.031976	--	sp|Q9FQA3|GST23_MAIZE Glutathione transferase GST 23 OS=Zea mays PE=2 SV=1//4.76995e-69
CSA000865	306.843	147.087	1.0608	0.0056842	0.029614	--	sp|Q9FPR3|EDR1_ARATH Serine/threonine-protein kinase EDR1 OS=Arabidopsis thaliana GN=EDR1 PE=1 SV=1//2.71415e-41
CSA000882	693.373	1396.05	-1.0097	0.0033302	0.019385	--	sp|Q8SAB7|SPK1_ARATH Guanine nucleotide exchange factor SPIKE 1 OS=Arabidopsis thaliana GN=SPK1 PE=1 SV=1//0
CSA000884	717.571	341.949	1.0693	0.00241	0.014989	--	-//-
CSA000900	642.033	273.228	1.2325	0.00086007	0.0065052	--	sp|Q9SZA7|DRL29_ARATH Probable disease resistance protein At4g33300 OS=Arabidopsis thaliana GN=At4g33300 PE=2 SV=3//4.22832e-162
CSA000901	310.934	118.45	1.3923	0.00037309	0.0032578	--	sp|Q9SZA7|DRL29_ARATH Probable disease resistance protein At4g33300 OS=Arabidopsis thaliana GN=At4g33300 PE=2 SV=3//7.00773e-102
CSA000903	2789.3	1229.46	1.1819	0.00074424	0.005773	--	sp|Q9CAD5|YODA_ARATH Mitogen-activated protein kinase kinase kinase YODA OS=Arabidopsis thaliana GN=YDA PE=1 SV=1//2.01878e-12
CSA000913	0.949152	18.821	-4.3096	0.0001661	0.0016469	--	-//-
CSA000915	24.0504	78.2327	-1.7017	0.00067726	0.0053437	--	sp|Q9XGA0|KPRS3_SPIOL Ribose-phosphate pyrophosphokinase 3, mitochondrial OS=Spinacia oleracea GN=PRS3 PE=2 SV=1//1.39918e-125
CSA000916	17.678	58.5152	-1.7269	0.0016882	0.011247	--	sp|Q9XGA0|KPRS3_SPIOL Ribose-phosphate pyrophosphokinase 3, mitochondrial OS=Spinacia oleracea GN=PRS3 PE=2 SV=1//2.71321e-62
CSA000918	3027.1	12580.3	-2.0552	8.2622e-06	0.00012578	--	sp|Q9S7E9|GGT2_ARATH Glutamate--glyoxylate aminotransferase 2 OS=Arabidopsis thaliana GN=GGAT2 PE=1 SV=1//0
CSA000919	428.712	155.402	1.464	8.8534e-05	0.00096492	--	sp|O66576|TRPD_AQUAE Anthranilate phosphoribosyltransferase OS=Aquifex aeolicus (strain VF5) GN=trpD PE=3 SV=1//2.40744e-16
CSA000920	426.536	46.0947	3.21	1.8192e-14	1.5997e-12	--	sp|P04635|LIP_STAHY Lipase OS=Staphylococcus hyicus GN=lip PE=1 SV=1//2.74277e-25
CSA000921	255.733	60.6272	2.0766	4.3243e-07	9.1917e-06	--	sp|Q56X72|RTNLS_ARATH Reticulon-like protein B21 OS=Arabidopsis thaliana GN=RTNLB21 PE=2 SV=2//1.31575e-33
CSA000926	202.249	33.1541	2.6089	2.3615e-09	8.381e-08	--	sp|F4J339|RPP1_ARATH Probable disease resistance protein RPP1 OS=Arabidopsis thaliana GN=RPP1 PE=2 SV=1//8.16213e-23
CSA000934	466.843	231.335	1.013	0.0057906	0.030043	--	-//-
CSA000942	731.064	260.473	1.4889	6.1947e-05	0.00071198	--	-//-
CSA000945	2.95841	26.0179	-3.1366	0.0090194	0.042456	--	sp|P0DH62|Y4407_SELML Inactive protein kinase SELMODRAFT_444075 OS=Selaginella moellendorffii GN=SELMODRAFT_444075 PE=2 SV=1//2.77319e-10
CSA000949	9.26775	353.125	-5.2518	9.7781e-14	7.7969e-12	--	sp|Q9ZVM9|Y1461_ARATH Probable serine/threonine-protein kinase At1g54610 OS=Arabidopsis thaliana GN=At1g54610 PE=1 SV=1//0
CSA000961	707.112	349.061	1.0185	0.0042594	0.02354	--	-//-
CSA000963	12602	4020.37	1.6483	2.634e-06	4.5699e-05	--	sp|P09189|HSP7C_PETHY Heat shock cognate 70 kDa protein OS=Petunia hybrida GN=HSP70 PE=2 SV=1//0
CSA000964	1738.68	3570.25	-1.038	0.0034294	0.019835	--	sp|Q9FY06|PPF1_PEA Inner membrane protein PPF-1, chloroplastic OS=Pisum sativum GN=PPF-1 PE=2 SV=2//0
CSA000970	8.96925	358.939	-5.3226	0.0063728	0.032344	--	sp|Q9SYM5|RHM1_ARATH Trifunctional UDP-glucose 4,6-dehydratase/UDP-4-keto-6-deoxy-D-glucose 3,5-epimerase/UDP-4-keto-L-rhamnose-reductase RHM1 OS=Arabidopsis thaliana GN=RHM1 PE=1 SV=1//0
CSA000976	0.35352	9.36282	-4.7271	0.0051178	0.027257	--	sp|Q42910|PPDK_MESCR Pyruvate, phosphate dikinase, chloroplastic OS=Mesembryanthemum crystallinum GN=PPD PE=2 SV=1//0
CSA000985	2040.24	38.2376	5.7376	5.0338e-21	1.1202e-18	--	-//-
CSA000986	198.423	3.44606	5.8475	4.4397e-15	4.1644e-13	--	-//-
CSA000992	1197.22	4906.75	-2.0351	8.1315e-08	2.1024e-06	--	sp|P34024|PLC_LISMO 1-phosphatidylinositol phosphodiesterase OS=Listeria monocytogenes serovar 1/2a (strain ATCC BAA-679 / EGD-e) GN=plcA PE=1 SV=1//1.19127e-15
CSA000996	336.894	1985.09	-2.5588	3.45e-12	2.1284e-10	--	sp|Q84JA6|CESA4_ARATH Cellulose synthase A catalytic subunit 4 [UDP-forming] OS=Arabidopsis thaliana GN=CESA4 PE=1 SV=1//0
CSA000999	5.18249	51.0512	-3.3002	0.00068141	0.0053707	--	sp|O82509|TBL23_ARATH Protein trichome birefringence-like 23 OS=Arabidopsis thaliana GN=TBL23 PE=2 SV=1//2.03302e-43
CSA001000	17.2779	99.8371	-2.5306	0.0011187	0.0080669	--	sp|O82509|TBL23_ARATH Protein trichome birefringence-like 23 OS=Arabidopsis thaliana GN=TBL23 PE=2 SV=1//2.22257e-104
CSA001002	0.316384	10.4915	-5.0514	0.002664	0.01624	--	-//-
CSA001004	482.574	2697.71	-2.4829	1.6234e-11	8.635e-10	--	sp|P51204|YCF54_PORPU Uncharacterized protein ycf54 OS=Porphyra purpurea GN=ycf54 PE=3 SV=1//3.95302e-14
CSA001018	516.524	194.361	1.4101	0.00038697	0.0033614	--	sp|C0LGG9|Y5344_ARATH Probable LRR receptor-like serine/threonine-protein kinase At1g53440 OS=Arabidopsis thaliana GN=At1g53440 PE=2 SV=2//1.91887e-41
CSA001019	342.317	145.676	1.2326	0.0012913	0.0090903	--	sp|C0LGN2|Y3148_ARATH Probable leucine-rich repeat receptor-like serine/threonine-protein kinase At3g14840 OS=Arabidopsis thaliana GN=LRR-RLK PE=2 SV=1//5.55957e-100
CSA001021	49.9258	150.218	-1.5892	0.0027493	0.016648	--	sp|P33543|TMKL1_ARATH Putative kinase-like protein TMKL1 OS=Arabidopsis thaliana GN=TMKL1 PE=1 SV=1//0
CSA001033	8.98759	53.0152	-2.5604	0.00099019	0.0073115	--	sp|Q05466|HAT4_ARATH Homeobox-leucine zipper protein HAT4 OS=Arabidopsis thaliana GN=HAT4 PE=1 SV=1//1.86545e-17
CSA001034	6.30797	31.5247	-2.3212	0.004442	0.024352	--	sp|Q05466|HAT4_ARATH Homeobox-leucine zipper protein HAT4 OS=Arabidopsis thaliana GN=HAT4 PE=1 SV=1//1.53876e-32
CSA001051	485.374	1004.23	-1.0489	0.0036105	0.020662	--	sp|Q8S8S2|LPCT2_ARATH Lysophospholipid acyltransferase LPEAT2 OS=Arabidopsis thaliana GN=LPEAT2 PE=1 SV=1//4.49967e-79
CSA001052	93.476	196.273	-1.0702	0.0092747	0.043372	--	sp|Q8S8S2|LPCT2_ARATH Lysophospholipid acyltransferase LPEAT2 OS=Arabidopsis thaliana GN=LPEAT2 PE=1 SV=1//3.65649e-103
CSA001056	148.034	345.196	-1.2215	0.0014526	0.010015	--	sp|Q8S8S2|LPCT2_ARATH Lysophospholipid acyltransferase LPEAT2 OS=Arabidopsis thaliana GN=LPEAT2 PE=1 SV=1//2.18332e-41
CSA001064	95.6497	23.3629	2.0335	4.0761e-05	0.00049578	--	sp|Q9M667|RPP13_ARATH Disease resistance protein RPP13 OS=Arabidopsis thaliana GN=RPP13 PE=2 SV=2//9.57653e-103
CSA001069	3996.78	496.09	3.0102	7.354e-16	7.6554e-14	--	sp|Q56WD9|THIK2_ARATH 3-ketoacyl-CoA thiolase 2, peroxisomal OS=Arabidopsis thaliana GN=PED1 PE=1 SV=2//0
CSA001077	305.636	51.8212	2.5602	6.5887e-10	2.6173e-08	--	-//-
CSA001081	22.0125	66.8487	-1.6026	0.0026714	0.016271	--	sp|Q9M0Y8|NSF_ARATH Vesicle-fusing ATPase OS=Arabidopsis thaliana GN=NSF PE=2 SV=2//2.23892e-35
CSA001082	8.47654	34.3639	-2.0193	0.0026583	0.01621	--	sp|Q5R410|NSF_PONAB Vesicle-fusing ATPase OS=Pongo abelii GN=NSF PE=2 SV=1//3.52888e-12
CSA001086	1303.65	149.43	3.125	0.0003577	0.0031411	--	sp|O64682|PID_ARATH Protein kinase PINOID OS=Arabidopsis thaliana GN=PID PE=1 SV=1//0
CSA001095	380.029	1826.84	-2.2652	4.0192e-10	1.6585e-08	--	sp|Q9FNL7|PTR3_ARATH Protein NRT1/ PTR FAMILY 5.2 OS=Arabidopsis thaliana GN=NPF5.2 PE=2 SV=1//0
CSA001108	811.915	368.295	1.1405	0.001594	0.010748	--	sp|Q8W425|PSMD6_ORYSJ 26S proteasome non-ATPase regulatory subunit 6 OS=Oryza sativa subsp. japonica GN=RPN7 PE=2 SV=1//0
CSA001113	21.4084	77.8727	-1.8629	0.00027799	0.0025339	--	sp|Q9ZT91|EFTM_ARATH Elongation factor Tu, mitochondrial OS=Arabidopsis thaliana GN=TUFA PE=1 SV=1//0
CSA001114	2722.21	10705.7	-1.9755	1.1757e-06	2.2432e-05	--	sp|O22506|GLNA2_DAUCA Glutamine synthetase, chloroplastic OS=Daucus carota GN=GLN2 PE=2 SV=1//0
CSA001117	868.074	382.902	1.1808	0.00080183	0.006136	--	sp|P54567|YQKD_BACSU Uncharacterized protein YqkD OS=Bacillus subtilis (strain 168) GN=yqkD PE=4 SV=1//3.789e-10
CSA001119	1847.99	862.276	1.0997	0.0014841	0.010157	--	sp|O64827|SUVR5_ARATH Histone-lysine N-methyltransferase SUVR5 OS=Arabidopsis thaliana GN=SUVR5 PE=1 SV=3//0
CSA001120	268.001	106.451	1.332	0.00057666	0.0046873	--	sp|O64827|SUVR5_ARATH Histone-lysine N-methyltransferase SUVR5 OS=Arabidopsis thaliana GN=SUVR5 PE=1 SV=3//1.44435e-18
CSA001124	810.982	310.355	1.3858	0.00011634	0.0012145	--	sp|Q8WV16|DCAF4_HUMAN DDB1- and CUL4-associated factor 4 OS=Homo sapiens GN=DCAF4 PE=1 SV=3//6.21341e-06
CSA001130	24.3484	101.788	-2.0637	0.0026484	0.016167	--	sp|Q38772|CDC2A_ANTMA Cell division control protein 2 homolog A OS=Antirrhinum majus GN=CDC2A PE=2 SV=2//5.25871e-62
CSA001131	41.3739	145.834	-1.8175	0.0017641	0.011646	--	sp|Q38772|CDC2A_ANTMA Cell division control protein 2 homolog A OS=Antirrhinum majus GN=CDC2A PE=2 SV=2//6.60187e-130
CSA001133	1865.63	508.935	1.8741	0.0025677	0.015759	--	sp|P36444|MAOC_FLAPR NADP-dependent malic enzyme, chloroplastic OS=Flaveria pringlei GN=MODA PE=2 SV=1//0
CSA001135	671.052	1425.25	-1.0867	0.0048761	0.026254	--	sp|Q8LPS6|PPR3_ARATH Pentatricopeptide repeat-containing protein At1g02150 OS=Arabidopsis thaliana GN=At1g02150 PE=2 SV=2//0
CSA001140	278.562	14.3153	4.2824	2.1991e-07	5.0509e-06	--	sp|Q8VWQ5|WRK50_ARATH Probable WRKY transcription factor 50 OS=Arabidopsis thaliana GN=WRKY50 PE=2 SV=1//3.35669e-13
CSA001151	1201.45	16.6801	6.1705	2.9264e-06	5.0332e-05	--	sp|D4N501|DIOX2_PAPSO Probable 2-oxoglutarate/Fe(II)-dependent dioxygenase OS=Papaver somniferum GN=DIOX2 PE=2 SV=1//1.1043e-34
CSA001152	5214.67	721.845	2.8528	5.4781e-05	0.00063972	--	sp|D4N500|DIOX1_PAPSO Thebaine 6-O-demethylase OS=Papaver somniferum GN=T6ODM PE=1 SV=1//2.53399e-35
CSA001155	52.4376	226.643	-2.1117	4.9265e-07	1.0351e-05	--	-//-
CSA001158	4.31701	32.1907	-2.8985	0.01064	0.048367	--	sp|H2DH22|C7A10_PANGI Cytochrome P450 CYP73A100 OS=Panax ginseng PE=2 SV=1//0
CSA001160	23.3541	704.073	-4.914	0.0070358	0.034988	--	sp|Q43872|PER64_ARATH Peroxidase 64 OS=Arabidopsis thaliana GN=PER64 PE=1 SV=1//5.25851e-153
CSA001162	625.272	239.825	1.3825	0.00023348	0.002191	--	-//-
CSA001165	37.6996	88.6334	-1.2333	0.0087753	0.041549	--	sp|Q9SL70|TCX6_ARATH Protein tesmin/TSO1-like CXC 6 OS=Arabidopsis thaliana GN=TCX6 PE=1 SV=1//6.80331e-10
CSA001167	344.972	700.74	-1.0224	0.0054901	0.028799	--	-//-
CSA001182	1.57252	36.2594	-4.5272	0.0005584	0.0045559	--	sp|Q40220|RAC2_LOTJA Rac-like GTP-binding protein RAC2 OS=Lotus japonicus GN=RAC2 PE=2 SV=1//1.52867e-113
CSA001188	3969.84	183.358	4.4363	4.1462e-08	1.146e-06	--	sp|P46643|AAT1_ARATH Aspartate aminotransferase, mitochondrial OS=Arabidopsis thaliana GN=ASP1 PE=1 SV=1//0
CSA001199	4.92158	28.453	-2.5314	0.0010196	0.0074853	--	sp|O97067|PTH2_DROME Probable peptidyl-tRNA hydrolase 2 OS=Drosophila melanogaster GN=CG1307 PE=2 SV=2//2.9479e-07
CSA001200	9.8897	35.6393	-1.8495	0.0041479	0.023047	--	-//-
CSA001206	704.527	344.43	1.0324	0.0037016	0.021052	--	sp|Q9LV21|TCPD_ARATH T-complex protein 1 subunit delta OS=Arabidopsis thaliana GN=CCT4 PE=1 SV=1//0
CSA001209	839.725	117.571	2.8364	4.4042e-07	9.3387e-06	--	-//-
CSA001213	187.684	676.969	-1.8508	5.8458e-05	0.00067651	--	sp|Q9SV68|QORH_ARATH Putative quinone-oxidoreductase homolog, chloroplastic OS=Arabidopsis thaliana GN=At4g13010 PE=2 SV=1//4.82173e-33
CSA001217	21.6322	70.0283	-1.6948	0.0011981	0.0085526	--	-//-
CSA001221	214.341	886.828	-2.0487	0.0085851	0.040853	--	sp|Q8VYL3|APA2_ARATH Aspartic proteinase A2 OS=Arabidopsis thaliana GN=APA2 PE=2 SV=1//5.8015e-126
CSA001232	933.371	430.413	1.1167	0.0018825	0.012284	--	-//-
CSA001233	73.9959	255.049	-1.7853	3.5346e-05	0.00043748	--	-//-
CSA001242	2053.44	630.643	1.7031	1.7439e-06	3.1812e-05	--	sp|Q9S7P9|SNP33_ARATH SNAP25 homologous protein SNAP33 OS=Arabidopsis thaliana GN=SNAP33 PE=1 SV=1//2.26037e-96
CSA001250	2929.94	1027.29	1.512	1.809e-05	0.00024658	--	-//-
CSA001261	59.5331	11.4439	2.3791	5.2204e-05	0.00061358	--	sp|Q9M667|RPP13_ARATH Disease resistance protein RPP13 OS=Arabidopsis thaliana GN=RPP13 PE=2 SV=2//8.1641e-99
CSA001264	6.95014	71.8513	-3.3699	2.1178e-08	6.2667e-07	--	sp|A7S4N4|SERIC_NEMVE Probable serine incorporator OS=Nematostella vectensis GN=serinc PE=3 SV=1//3.49774e-06
CSA001271	989.895	62.2929	3.9901	5.6712e-11	2.7064e-09	--	sp|P27450|CX32_ARATH Probable serine/threonine-protein kinase Cx32, chloroplastic OS=Arabidopsis thaliana GN=At4g35600 PE=1 SV=2//1.15053e-136
CSA001295	711.439	313.825	1.1808	0.001161	0.0083345	--	sp|Q9P6Q3|BCS1_SCHPO Probable mitochondrial chaperone bcs1 OS=Schizosaccharomyces pombe (strain 972 / ATCC 24843) GN=SPAC644.07 PE=2 SV=1//1.78115e-27
CSA001296	228.398	607.722	-1.4119	0.00014748	0.0014918	--	-//-
CSA001297	255.414	663.934	-1.3782	0.00020214	0.0019429	--	-//-
CSA001302	545.936	1296.61	-1.2479	0.0038839	0.021858	--	sp|Q9SQ64|COR2_PAPSO Non-functional NADPH-dependent codeinone reductase 2 OS=Papaver somniferum GN=COR2 PE=1 SV=1//2.1377e-147
CSA001316	64.2322	11.4175	2.492	1.5179e-05	0.00021179	--	sp|Q9M667|RPP13_ARATH Disease resistance protein RPP13 OS=Arabidopsis thaliana GN=RPP13 PE=2 SV=2//2.27206e-144
CSA001323	69.2892	541.211	-2.9655	0.010723	0.048678	--	sp|Q8LFN2|Y3037_ARATH Probable inactive leucine-rich repeat receptor-like protein kinase At3g03770 OS=Arabidopsis thaliana GN=At3g03770 PE=2 SV=1//7.34341e-112
CSA001329	33.532	307.169	-3.1954	1.2633e-13	9.8591e-12	--	sp|Q94A34|SFH12_ARATH Phosphatidylinositol/phosphatidylcholine transfer protein SFH12 OS=Arabidopsis thaliana GN=SFH12 PE=2 SV=1//0
CSA001332	1.37694	74.33	-5.7544	0.0052285	0.027703	--	sp|Q9FWX7|AB11B_ARATH ABC transporter B family member 11 OS=Arabidopsis thaliana GN=ABCB11 PE=2 SV=1//4.05095e-15
CSA001343	14.7643	1.41765	3.3805	0.00297	0.017729	--	sp|Q94CG5|KIP1_PETIN Kinase-interacting protein 1 OS=Petunia integrifolia GN=KIP1 PE=1 SV=1//1.22236e-65
CSA001351	390.609	174.986	1.1585	0.0022863	0.014386	--	sp|Q9C6Z0|FBK17_ARATH F-box/kelch-repeat protein At1g30090 OS=Arabidopsis thaliana GN=At1g30090 PE=2 SV=1//0
CSA001352	4027.44	1022.61	1.9776	0.00013012	0.0013385	--	sp|P46644|AAT3_ARATH Aspartate aminotransferase 3, chloroplastic OS=Arabidopsis thaliana GN=ASP3 PE=1 SV=1//0
CSA001363	271.961	124.472	1.1276	0.0034967	0.020148	--	sp|Q9ZVN2|Y1457_ARATH Acyltransferase-like protein At1g54570, chloroplastic OS=Arabidopsis thaliana GN=At1g54570 PE=2 SV=1//1.91212e-45
CSA001367	42.5549	14.3055	1.5728	0.0088419	0.041806	--	sp|Q03666|GSTX4_TOBAC Probable glutathione S-transferase OS=Nicotiana tabacum PE=2 SV=1//7.62161e-89
CSA001390	28.9711	4.63336	2.6445	0.00075691	0.0058619	--	sp|Q94CD1|HHT1_ARATH Omega-hydroxypalmitate O-feruloyl transferase OS=Arabidopsis thaliana GN=HHT1 PE=1 SV=1//1.49172e-48
CSA001396	770.486	196.934	1.9681	1.8016e-07	4.2224e-06	--	sp|Q9ZS51|PMP22_ARATH Peroxisomal membrane protein PMP22 OS=Arabidopsis thaliana GN=PMP22 PE=1 SV=1//1.18894e-69
CSA001400	0	9.60632	#NAME?	0.0012981	0.0091276	--	sp|Q945B6|AOP1L_ARATH Probable 2-oxoglutarate-dependent dioxygenase AOP1.2 OS=Arabidopsis thaliana GN=AOP1.2 PE=2 SV=1//2.47824e-80
CSA001404	1051.87	8101.97	-2.9453	6.0201e-12	3.5104e-10	--	sp|P29790|ATPG_TOBAC ATP synthase gamma chain, chloroplastic OS=Nicotiana tabacum GN=ATPC PE=1 SV=1//0
CSA001411	259.633	90.257	1.5244	0.00013584	0.0013891	--	sp|Q04088|POF21_ARATH Probable transcription factor PosF21 OS=Arabidopsis thaliana GN=POSF21 PE=2 SV=1//2.0763e-42
CSA001412	226.478	99.0769	1.1927	0.0028681	0.017231	--	sp|Q69IL4|RF2A_ORYSJ Transcription factor RF2a OS=Oryza sativa subsp. japonica GN=RF2a PE=1 SV=1//2.12618e-10
CSA001422	44.7391	1.01421	5.4631	4.7878e-06	7.7718e-05	--	sp|C0LGQ5|GSO1_ARATH LRR receptor-like serine/threonine-protein kinase GSO1 OS=Arabidopsis thaliana GN=GSO1 PE=2 SV=1//3.0765e-26
CSA001424	35.7805	1.59074	4.4914	0.00014036	0.0014274	--	sp|Q40392|TMVRN_NICGU TMV resistance protein N OS=Nicotiana glutinosa GN=N PE=1 SV=1//1.04195e-70
CSA001431	173.289	432.96	-1.3211	0.00051579	0.0042617	--	-//-
CSA001440	26.5528	75.408	-1.5059	0.0027013	0.016424	--	sp|F4IRU3|MYO12_ARATH Myosin-12 OS=Arabidopsis thaliana GN=XI-F PE=2 SV=1//0
CSA001441	31.5576	88.2695	-1.4839	0.0018615	0.012173	--	sp|F4IRU3|MYO12_ARATH Myosin-12 OS=Arabidopsis thaliana GN=XI-F PE=2 SV=1//0
CSA001447	201.444	1439.76	-2.8374	9.6762e-14	7.7298e-12	--	-//-
CSA001448	273.734	42.1294	2.6999	6.7394e-10	2.6747e-08	--	sp|P11890|HS23C_OXYRB Small heat shock protein, chloroplastic OS=Oxybasis rubra GN=HSP23 PE=2 SV=1//1.22643e-59
CSA001452	40.2486	152.792	-1.9246	1.3312e-05	0.00018987	--	sp|Q8RWD5|SCD2_ARATH Coiled-coil domain-containing protein SCD2 OS=Arabidopsis thaliana GN=SCD2 PE=1 SV=1//6.35168e-16
CSA001453	4.22394	25.3913	-2.5877	0.0014016	0.0097227	--	-//-
CSA001454	33.0563	134.626	-2.026	8.4416e-06	0.00012794	--	-//-
CSA001460	912.643	277.252	1.7189	2.327e-06	4.0942e-05	--	sp|Q0WU02|MTP10_ARATH Metal tolerance protein 10 OS=Arabidopsis thaliana GN=MTP10 PE=2 SV=1//1.21277e-118
CSA001461	295.436	77.9463	1.9223	1.8433e-06	3.3472e-05	--	sp|Q0WU02|MTP10_ARATH Metal tolerance protein 10 OS=Arabidopsis thaliana GN=MTP10 PE=2 SV=1//2.01366e-50
CSA001467	0.70704	55.6385	-6.2981	1.0854e-07	2.6991e-06	--	sp|O80470|GDL38_ARATH GDSL esterase/lipase At2g23540 OS=Arabidopsis thaliana GN=At2g23540 PE=2 SV=1//0
CSA001470	1583.83	12.4857	6.987	4.0494e-17	5.2102e-15	--	sp|Q8VWZ7|C76B6_CATRO Geraniol 8-hydroxylase OS=Catharanthus roseus GN=CYP76B6 PE=1 SV=1//0
CSA001479	100.861	663.792	-2.7184	0.0022524	0.014224	--	sp|Q67YC9|Y4141_ARATH Uncharacterized protein At4g14100 OS=Arabidopsis thaliana GN=At4g14100 PE=2 SV=1//2.68892e-58
CSA001480	16.4967	145.569	-3.1415	0.0042009	0.023299	--	-//-
CSA001485	2483.53	701.457	1.824	2.4092e-07	5.4901e-06	--	sp|Q9FFE6|AAE5_ARATH Probable acyl-activating enzyme 5, peroxisomal OS=Arabidopsis thaliana GN=AAE5 PE=2 SV=1//1.18991e-165
CSA001486	693.315	112.841	2.6192	1.3885e-11	7.477e-10	--	sp|Q9FDW1|MYB44_ARATH Transcription factor MYB44 OS=Arabidopsis thaliana GN=MYB44 PE=2 SV=1//1.01625e-59
CSA001494	6924.14	1556.09	2.1537	2.6154e-06	4.543e-05	--	sp|Q9FJH6|AB1F_ARATH ABC transporter F family member 1 OS=Arabidopsis thaliana GN=ABCF1 PE=1 SV=1//0
CSA001495	74.0645	554.191	-2.9035	5.1766e-13	3.6068e-11	--	sp|O24370|LOX21_SOLTU Linoleate 13S-lipoxygenase 2-1, chloroplastic OS=Solanum tuberosum GN=LOX2.1 PE=1 SV=1//0
CSA001498	0.939754	191.518	-7.671	0.00058692	0.004753	--	sp|Q9SR72|GL32_ARATH Germin-like protein subfamily 3 member 2 OS=Arabidopsis thaliana GN=At3g10080 PE=2 SV=1//4.345e-96
CSA001500	430.117	51.7989	3.0537	0.00015599	0.0015667	--	sp|Q8L9W3|ATL23_ARATH E3 ubiquitin-protein ligase ATL23 OS=Arabidopsis thaliana GN=ATL23 PE=1 SV=2//1.94662e-41
CSA001506	3408	7222.5	-1.0836	0.0021524	0.013701	--	sp|Q38897|BEL1_ARATH Homeobox protein BEL1 homolog OS=Arabidopsis thaliana GN=BEL1 PE=1 SV=2//1.44982e-66
CSA001519	1.29327	11.8223	-3.1924	0.010903	0.04929	--	sp|Q8GW29|LOG7_ARATH Cytokinin riboside 5&apos;-monophosphate phosphoribohydrolase LOG7 OS=Arabidopsis thaliana GN=LOG7 PE=1 SV=2//6.0805e-22
CSA001527	69.0622	324.679	-2.233	4.6168e-08	1.2625e-06	--	-//-
CSA001560	1975.7	220.069	3.1663	0.00049023	0.0040884	--	sp|Q9SJY5|PUMP5_ARATH Mitochondrial uncoupling protein 5 OS=Arabidopsis thaliana GN=PUMP5 PE=2 SV=1//4.43012e-151
CSA001561	252.963	59.7525	2.0819	5.788e-07	1.1936e-05	--	-//-
CSA001567	33.038	88.5782	-1.4228	0.0027815	0.016794	--	sp|Q8H183|BUP1_ARATH Beta-ureidopropionase OS=Arabidopsis thaliana GN=PYD3 PE=1 SV=1//0
CSA001569	1.24674	13.1814	-3.4023	0.0050716	0.027075	--	sp|P0CB23|Y4862_ARATH Uncharacterized protein At4g38062 OS=Arabidopsis thaliana GN=At4g38062 PE=4 SV=1//4.10927e-13
CSA001576	508.798	184.463	1.4638	7.2915e-05	0.00081777	--	sp|Q8RWY4|NLP6_ARATH Protein NLP6 OS=Arabidopsis thaliana GN=NLP6 PE=2 SV=2//3.51317e-41
CSA001577	1257.97	91.5166	3.7809	1.481e-09	5.4835e-08	--	-//-
CSA001578	1614.98	137.376	3.5553	1.5055e-08	4.5983e-07	--	sp|Q9LYT3|TT12_ARATH Protein TRANSPARENT TESTA 12 OS=Arabidopsis thaliana GN=TT12 PE=2 SV=1//1.6354e-28
CSA001580	251.142	105.608	1.2498	0.0099736	0.045961	--	sp|Q7Y208|GPDL1_ARATH Glycerophosphodiester phosphodiesterase GDPDL1 OS=Arabidopsis thaliana GN=GDPDL1 PE=1 SV=2//9.59695e-19
CSA001581	144.299	30.6855	2.2334	1.0621e-05	0.0001565	--	sp|Q9FJ62|GPDL4_ARATH Glycerophosphodiester phosphodiesterase GDPDL4 OS=Arabidopsis thaliana GN=GDPDL4 PE=1 SV=1//3.26234e-66
CSA001582	271.468	117.454	1.2087	0.0018598	0.012167	--	sp|Q9FJX2|RL262_ARATH 60S ribosomal protein L26-2 OS=Arabidopsis thaliana GN=RPL26B PE=2 SV=1//9.00974e-09
CSA001588	50.8928	154.923	-1.606	0.00019439	0.0018816	--	sp|Q94AG2|SERK1_ARATH Somatic embryogenesis receptor kinase 1 OS=Arabidopsis thaliana GN=SERK1 PE=1 SV=2//0
CSA001595	134.925	295.312	-1.1301	0.0039358	0.022097	--	sp|Q93ZE2|TGA7_ARATH Transcription factor TGA7 OS=Arabidopsis thaliana GN=TGA7 PE=1 SV=1//4.10972e-94
CSA001596	6.47531	27.7962	-2.1019	0.0050037	0.02679	--	sp|Q2MHE4|HT1_ARATH Serine/threonine-protein kinase HT1 OS=Arabidopsis thaliana GN=HT1 PE=1 SV=1//1.50882e-06
CSA001599	403.875	61.9955	2.7037	2.5238e-11	1.3027e-09	--	sp|Q03194|PMA4_NICPL Plasma membrane ATPase 4 OS=Nicotiana plumbaginifolia GN=PMA4 PE=2 SV=1//8.34851e-116
CSA001600	1154.84	26.5378	5.4435	3.8947e-35	4.0447e-32	--	sp|Q9M886|LBD41_ARATH LOB domain-containing protein 41 OS=Arabidopsis thaliana GN=LBD41 PE=2 SV=1//8.24853e-85
CSA001602	0	8.72307	#NAME?	0.0022346	0.014129	--	sp|Q9SUQ8|DIR6_ARATH Dirigent protein 6 OS=Arabidopsis thaliana GN=DIR6 PE=1 SV=1//1.0328e-77
CSA001603	386.962	1262.65	-1.7062	8.2556e-05	0.00090885	--	-//-
CSA001619	5701.04	2571.46	1.1486	0.0036977	0.021039	--	sp|Q9SYM5|RHM1_ARATH Trifunctional UDP-glucose 4,6-dehydratase/UDP-4-keto-6-deoxy-D-glucose 3,5-epimerase/UDP-4-keto-L-rhamnose-reductase RHM1 OS=Arabidopsis thaliana GN=RHM1 PE=1 SV=1//0
CSA001632	225.037	39.2624	2.5189	6.7569e-09	2.2142e-07	--	sp|Q9FID5|Y5393_ARATH Probable receptor-like protein kinase At5g39030 OS=Arabidopsis thaliana GN=At5g39030 PE=2 SV=1//3.01089e-118
CSA001635	41.8863	1072.65	-4.6786	0.005474	0.028738	--	sp|Q8LPK2|AB2B_ARATH ABC transporter B family member 2 OS=Arabidopsis thaliana GN=ABCB2 PE=1 SV=3//1.97244e-110
CSA001637	16.3095	382.025	-4.5499	0.00526	0.027809	--	sp|Q8LPK2|AB2B_ARATH ABC transporter B family member 2 OS=Arabidopsis thaliana GN=ABCB2 PE=1 SV=3//2.29321e-08
CSA001638	281.352	17.6291	3.9963	8.1934e-07	1.6156e-05	--	sp|O22808|LYK5_ARATH Protein LYK5 OS=Arabidopsis thaliana GN=LYK5 PE=2 SV=1//1.93294e-30
CSA001641	28.1705	4.09763	2.7813	0.00045612	0.0038541	--	sp|Q9FX01|HSDD1_ARATH 3beta-hydroxysteroid-dehydrogenase/decarboxylase isoform 1 OS=Arabidopsis thaliana GN=3BETAHSD/D1 PE=2 SV=1//4.14497e-24
CSA001654	1089.83	58014.9	-5.7343	2.1099e-07	4.859e-06	--	sp|Q942D4|BURP3_ORYSJ BURP domain-containing protein 3 OS=Oryza sativa subsp. japonica GN=BURP3 PE=2 SV=1//1.38805e-89
CSA001655	194.437	1044.54	-2.4255	2.2008e-07	5.0521e-06	--	sp|Q9LSN7|BH147_ARATH Transcription factor bHLH147 OS=Arabidopsis thaliana GN=BHLH147 PE=1 SV=1//1.41136e-47
CSA001657	439.405	212.996	1.0447	0.0055277	0.028965	--	sp|P57741|PFD3_ARATH Probable prefoldin subunit 3 OS=Arabidopsis thaliana GN=At5g49510 PE=1 SV=1//6.54902e-90
CSA001659	1.26554	38.2996	-4.9195	2.4371e-05	0.00031817	--	sp|Q6PWU2|ATESY_VITVI (-)-alpha-terpineol synthase OS=Vitis vinifera PE=1 SV=1//3.43685e-17
CSA001660	0.306986	10.4428	-5.0882	0.0027075	0.016452	--	sp|Q6PWU2|ATESY_VITVI (-)-alpha-terpineol synthase OS=Vitis vinifera PE=1 SV=1//0
CSA001668	0.306986	29.9378	-6.6077	2.9229e-08	8.3708e-07	--	sp|Q9ZQC6|IRX9_ARATH Probable beta-1,4-xylosyltransferase IRX9 OS=Arabidopsis thaliana GN=IRX9 PE=2 SV=1//1.10317e-108
CSA001669	0.632768	11.1727	-4.1422	0.0039546	0.022168	--	sp|Q9ZQC6|IRX9_ARATH Probable beta-1,4-xylosyltransferase IRX9 OS=Arabidopsis thaliana GN=IRX9 PE=2 SV=1//2.83987e-08
CSA001671	94.0363	667.284	-2.827	4.0732e-05	0.00049557	--	-//-
CSA001673	1108.39	431.007	1.3627	0.00015036	0.0015189	--	sp|P46297|RS23_FRAAN 40S ribosomal protein S23 OS=Fragaria ananassa GN=RPS23 PE=2 SV=1//5.88525e-95
CSA001683	2017.23	70.046	4.8479	9.3304e-18	1.2838e-15	--	sp|P13087|MIRA_SYNDU Miraculin OS=Synsepalum dulcificum PE=1 SV=3//8.37046e-47
CSA001701	3206.53	827.875	1.9535	3.4486e-08	9.6919e-07	--	-//-
CSA001710	1697.37	313.257	2.4379	4.2838e-11	2.0877e-09	--	sp|Q9GZU7|CTDS1_HUMAN Carboxy-terminal domain RNA polymerase II polypeptide A small phosphatase 1 OS=Homo sapiens GN=CTDSP1 PE=1 SV=1//9.02946e-15
CSA001722	1083.75	472.538	1.1975	0.00080364	0.0061485	--	sp|Q9SKN2|DRB2_ARATH Double-stranded RNA-binding protein 2 OS=Arabidopsis thaliana GN=DRB2 PE=1 SV=1//1.90611e-86
CSA001723	878.601	2257.64	-1.3615	0.00014553	0.0014755	--	sp|Q9S726|RPI3_ARATH Probable ribose-5-phosphate isomerase 3, chloroplastic OS=Arabidopsis thaliana GN=RPI3 PE=1 SV=1//3.75693e-108
CSA001728	117.285	663.348	-2.4997	7.1919e-06	0.00011132	--	-//-
CSA001729	778.177	57.0238	3.7705	3.9699e-06	6.5839e-05	--	-//-
CSA001732	124.022	1953.97	-3.9777	1.585e-23	4.8684e-21	--	sp|Q8L5A7|SOT15_ARATH Cytosolic sulfotransferase 15 OS=Arabidopsis thaliana GN=SOT15 PE=1 SV=1//5.00633e-95
CSA001733	2.49348	25.8349	-3.3731	0.00016463	0.0016368	--	sp|Q2VEX9|CRTSO_DAUCA Prolycopene isomerase, chloroplastic OS=Daucus carota GN=CRTISO PE=2 SV=1//6.95761e-08
CSA001743	5.11762	59.2886	-3.5342	6.4021e-05	0.00073234	--	sp|Q38914|ANT_ARATH AP2-like ethylene-responsive transcription factor ANT OS=Arabidopsis thaliana GN=ANT PE=1 SV=2//5.77899e-26
CSA001751	470.962	51.0018	3.207	1.7416e-08	5.2352e-07	--	sp|Q2Q493|MIF3_ARATH Mini zinc finger protein 3 OS=Arabidopsis thaliana GN=MIF3 PE=1 SV=1//5.87557e-09
CSA001753	2241.37	943.282	1.2486	0.00043484	0.0037009	--	sp|F4JKK0|SUD1_ARATH Probable E3 ubiquitin ligase SUD1 OS=Arabidopsis thaliana GN=SUD1 PE=1 SV=1//6.79116e-08
CSA001755	2.20529	331.281	-7.2309	1.5372e-05	0.00021394	--	-//-
CSA001761	8.62512	110.439	-3.6786	8.6998e-09	2.7819e-07	--	sp|O49459|NAC73_ARATH NAC domain-containing protein 73 OS=Arabidopsis thaliana GN=NAC073 PE=2 SV=1//1.55187e-109
CSA001775	481.94	233.719	1.0441	0.0050144	0.02684	--	-//-
CSA001777	2223.86	6632.9	-1.5766	5.2135e-05	0.00061293	--	sp|P0DKC4|PGP1B_ARATH Phosphoglycolate phosphatase 1B, chloroplastic OS=Arabidopsis thaliana GN=PGLP1B PE=1 SV=1//0
CSA001781	3901.81	811.42	2.2656	3.6768e-06	6.1516e-05	--	sp|Q3EBC8|DCL2_ARATH Endoribonuclease Dicer homolog 2 OS=Arabidopsis thaliana GN=At3g03300 PE=1 SV=2//9.20141e-123
CSA001788	780.072	359.713	1.1168	0.0014634	0.010048	--	sp|Q9C983|WRK57_ARATH Probable WRKY transcription factor 57 OS=Arabidopsis thaliana GN=WRKY57 PE=2 SV=1//3.24636e-58
CSA001794	1022.07	456.544	1.1627	0.0012621	0.0089261	--	sp|Q9M1J1|FIS1A_ARATH Mitochondrial fission 1 protein A OS=Arabidopsis thaliana GN=FIS1A PE=1 SV=1//7.99867e-45
CSA001799	1.67453	196.88	-6.8774	5.5072e-09	1.8392e-07	--	sp|Q9LSL1|BH093_ARATH Transcription factor bHLH93 OS=Arabidopsis thaliana GN=BHLH93 PE=1 SV=1//7.86261e-83
CSA001814	69.4979	13.3926	2.3755	1.5897e-05	0.00022019	--	sp|Q39214|RPM1_ARATH Disease resistance protein RPM1 OS=Arabidopsis thaliana GN=RPM1 PE=1 SV=1//6.94617e-174
CSA001816	138.912	49.956	1.4754	0.00063319	0.005061	--	sp|Q8GYN5|RIN4_ARATH RPM1-interacting protein 4 OS=Arabidopsis thaliana GN=RIN4 PE=1 SV=1//3.91899e-08
CSA001819	108.119	5.64756	4.2588	2.022e-13	1.5076e-11	--	sp|O48676|U74B1_ARATH UDP-glycosyltransferase 74B1 OS=Arabidopsis thaliana GN=UGT74B1 PE=1 SV=1//1.56349e-142
CSA001820	8676.77	3272.69	1.4067	4.7505e-05	0.00056628	--	sp|P42055|VDAC1_SOLTU Mitochondrial outer membrane protein porin of 34 kDa OS=Solanum tuberosum PE=1 SV=2//1.53165e-172
CSA001834	2250.47	660.87	1.7678	7.0014e-07	1.406e-05	--	sp|O04331|PHB3_ARATH Prohibitin-3, mitochondrial OS=Arabidopsis thaliana GN=PHB3 PE=1 SV=1//2.05188e-143
CSA001838	199.088	1.71974	6.8551	2.0682e-12	1.3266e-10	--	sp|P26587|TIP31_ARATH Aquaporin TIP3-1 OS=Arabidopsis thaliana GN=TIP3-1 PE=2 SV=1//5.51799e-96
CSA001840	3.51736	36.9807	-3.3942	0.0043351	0.023886	--	sp|Q9FGY4|FB341_ARATH F-box protein At5g49610 OS=Arabidopsis thaliana GN=At5g49610 PE=1 SV=1//4.37412e-21
CSA001842	219.301	61.6395	1.831	1.0658e-05	0.00015678	--	sp|Q9LDR2|CNG19_ARATH Putative cyclic nucleotide-gated ion channel 19 OS=Arabidopsis thaliana GN=CNGC19 PE=3 SV=1//1.0217e-27
CSA001844	427.316	138.208	1.6285	1.9343e-05	0.00026104	--	sp|Q9LD37|CNG20_ARATH Probable cyclic nucleotide-gated ion channel 20, chloroplastic OS=Arabidopsis thaliana GN=CNGC20 PE=2 SV=1//1.11876e-60
CSA001845	186.955	51.6889	1.8548	1.4863e-05	0.00020779	--	sp|Q9LD37|CNG20_ARATH Probable cyclic nucleotide-gated ion channel 20, chloroplastic OS=Arabidopsis thaliana GN=CNGC20 PE=2 SV=1//9.47967e-10
CSA001847	585.502	187.178	1.6453	1.1016e-05	0.00016129	--	sp|Q9LD37|CNG20_ARATH Probable cyclic nucleotide-gated ion channel 20, chloroplastic OS=Arabidopsis thaliana GN=CNGC20 PE=2 SV=1//3.48465e-98
CSA001860	6.81095	46.0506	-2.7573	0.00025723	0.0023755	--	sp|Q9LZD8|U89A2_ARATH UDP-glycosyltransferase 89A2 OS=Arabidopsis thaliana GN=UGT89A2 PE=2 SV=1//9.17409e-119
CSA001861	8.32708	46.0282	-2.4666	0.0013547	0.009466	--	sp|Q9LNE6|U89C1_ARATH UDP-glycosyltransferase 89C1 OS=Arabidopsis thaliana GN=UGT89C1 PE=2 SV=1//1.55846e-17
CSA001862	22.7016	238.914	-3.3956	7.7712e-09	2.5182e-07	--	sp|Q7VG78|GUAA_HELHP Probable GMP synthase [glutamine-hydrolyzing] OS=Helicobacter hepaticus (strain ATCC 51449 / 3B1) GN=guaA PE=3 SV=1//7.67261e-39
CSA001866	61.5451	135.493	-1.1385	0.0086828	0.041205	--	sp|Q9LMY5|PPR41_ARATH Putative pentatricopeptide repeat-containing protein At1g13630 OS=Arabidopsis thaliana GN=At1g13630 PE=2 SV=3//0
CSA001875	1899.04	312.311	2.6042	5.04e-09	1.6949e-07	--	sp|Q3ZBR5|TTC1_BOVIN Tetratricopeptide repeat protein 1 OS=Bos taurus GN=TTC1 PE=2 SV=1//4.32187e-13
CSA001879	19.102	86.1173	-2.1726	2.8921e-05	0.00036777	--	-//-
CSA001885	188.583	507.565	-1.4284	0.00016987	0.0016781	--	-//-
CSA001888	2172.96	872.765	1.316	0.0047509	0.025725	--	sp|Q42600|C84A1_ARATH Cytochrome P450 84A1 OS=Arabidopsis thaliana GN=CYP84A1 PE=1 SV=1//3.17364e-141
CSA001890	3405.94	377.325	3.1742	0.00018528	0.0018047	--	sp|Q9KG32|Y283_BACHD Uncharacterized isomerase BH0283 OS=Bacillus halodurans (strain ATCC BAA-125 / DSM 18197 / FERM 7344 / JCM 9153 / C-125) GN=BH0283 PE=3 SV=1//1.15264e-55
CSA001893	1304.96	642.249	1.0228	0.0044122	0.024226	--	sp|Q94AI6|SEC6_ARATH Exocyst complex component SEC6 OS=Arabidopsis thaliana GN=SEC6 PE=1 SV=1//0
CSA001898	19.6967	209.954	-3.414	2.4603e-10	1.0625e-08	--	sp|Q9M548|DRM2_ARATH DNA (cytosine-5)-methyltransferase DRM2 OS=Arabidopsis thaliana GN=DRM2 PE=1 SV=1//0
CSA001900	4.12148	43.5068	-3.4	3.6493e-06	6.1166e-05	--	-//-
CSA001912	51.2064	3.3039	3.9541	3.7237e-08	1.0418e-06	--	sp|P46604|HAT22_ARATH Homeobox-leucine zipper protein HAT22 OS=Arabidopsis thaliana GN=HAT22 PE=1 SV=1//2.04771e-68
CSA001919	366.98	1016.34	-1.4696	0.0008856	0.0066679	--	-//-
CSA001922	29.0571	154.498	-2.4106	0.00011094	0.0011688	--	sp|Q9SCZ4|FERON_ARATH Receptor-like protein kinase FERONIA OS=Arabidopsis thaliana GN=FER PE=1 SV=1//4.49356e-17
CSA001923	29.1215	74.7504	-1.36	0.0065517	0.033086	--	-//-
CSA001964	368.163	850.92	-1.2087	0.00066104	0.0052423	--	sp|Q9LUG9|MD33A_ARATH Mediator of RNA polymerase II transcription subunit 33A OS=Arabidopsis thaliana GN=MED33A PE=1 SV=1//0
CSA001967	192.204	80.5836	1.2541	0.002363	0.014756	--	sp|P35493|PMGI_RICCO 2,3-bisphosphoglycerate-independent phosphoglycerate mutase OS=Ricinus communis PE=1 SV=2//0
CSA001974	0	27.406	#NAME?	1.6712e-08	5.0515e-07	--	sp|Q8GWW4|GUX2_ARATH UDP-glucuronate:xylan alpha-glucuronosyltransferase 2 OS=Arabidopsis thaliana GN=GUX2 PE=2 SV=1//9.04297e-87
CSA001975	3.40504	27.2118	-2.9985	0.00038978	0.0033806	--	sp|Q8GWW4|GUX2_ARATH UDP-glucuronate:xylan alpha-glucuronosyltransferase 2 OS=Arabidopsis thaliana GN=GUX2 PE=2 SV=1//5.41884e-162
CSA001985	659.718	283.009	1.221	0.0009436	0.0070233	--	sp|Q54XK2|SC61A_DICDI Protein transport protein Sec61 subunit alpha OS=Dictyostelium discoideum GN=sec61a PE=3 SV=1//0
CSA001986	71.2237	391.503	-2.4586	9.1771e-10	3.5644e-08	--	-//-
CSA001987	30.1731	192.559	-2.674	2.337e-09	8.3006e-08	--	-//-
CSA001989	327.097	122.18	1.4207	0.00021532	0.0020457	--	sp|B9RBT0|DRE2_RICCO Anamorsin homolog OS=Ricinus communis GN=RCOM_1680640 PE=3 SV=1//3.41721e-12
CSA001990	1687.72	664.242	1.3453	0.00015412	0.0015511	--	sp|D1I234|DRE2_VITVI Anamorsin homolog OS=Vitis vinifera GN=VIT_01s0010g01180 PE=3 SV=1//1.1645e-83
CSA001997	324.872	726.954	-1.162	0.0017087	0.011348	--	sp|Q8RWM7|CCB3_ARATH Protein COFACTOR ASSEMBLY OF COMPLEX C SUBUNIT B CCB3, chloroplastic OS=Arabidopsis thaliana GN=CCB3 PE=1 SV=1//2.38484e-43
CSA001998	774.294	313.814	1.303	0.00033061	0.0029375	--	sp|O65059|RS15_PICMA 40S ribosomal protein S15 OS=Picea mariana GN=RPS15 PE=2 SV=1//2.59222e-93
CSA002001	49.7089	8.58421	2.5337	0.0004811	0.0040269	--	sp|Q7XU38|C87A3_ORYSJ Cytochrome P450 87A3 OS=Oryza sativa subsp. japonica GN=CYP87A3 PE=2 SV=3//1.20404e-83
CSA002007	1388.64	694.066	1.0005	0.0044107	0.02422	--	sp|Q93V84|FLXL1_ARATH Protein FLX-like 1 OS=Arabidopsis thaliana GN=FLXL1 PE=1 SV=1//1.30168e-97
CSA002010	0	12.1948	#NAME?	0.0001885	0.0018336	--	-//-
CSA002015	123.048	21.9532	2.4867	3.0196e-07	6.6992e-06	--	sp|Q6NLC8|Y1648_ARATH Uncharacterized protein At1g66480 OS=Arabidopsis thaliana GN=At1g66480 PE=2 SV=1//2.59883e-59
CSA002020	3267.55	933.288	1.8078	3.9381e-07	8.4992e-06	--	sp|Q39008|M3K1_ARATH Mitogen-activated protein kinase kinase kinase 1 OS=Arabidopsis thaliana GN=MEKK1 PE=1 SV=2//1.63559e-153
CSA002025	53.0708	292.289	-2.4614	0.0086851	0.041208	--	sp|Q54YW1|ELMOA_DICDI ELMO domain-containing protein A OS=Dictyostelium discoideum GN=elmoA PE=1 SV=1//2.91713e-26
CSA002027	6.4843	83.2709	-3.6828	3.2198e-05	0.00040422	--	sp|Q9LHD1|AB15B_ARATH ABC transporter B family member 15 OS=Arabidopsis thaliana GN=ABCB15 PE=3 SV=1//3.98441e-10
CSA002031	150.468	616.101	-2.0337	4.1759e-05	0.00050679	--	sp|Q9SVM0|Y3078_ARATH BTB/POZ domain-containing protein At3g50780 OS=Arabidopsis thaliana GN=At3g50780 PE=2 SV=1//0
CSA002037	1.87951	144.269	-6.2623	6.0255e-09	1.991e-07	--	sp|Q9SJ81|FLA7_ARATH Fasciclin-like arabinogalactan protein 7 OS=Arabidopsis thaliana GN=FLA7 PE=1 SV=1//1.72081e-73
CSA002038	0.930356	14.5451	-3.9666	0.0013352	0.0093524	--	sp|Q9FKI0|FIMB5_ARATH Fimbrin-5 OS=Arabidopsis thaliana GN=FIM5 PE=1 SV=1//0
CSA002040	1261.47	557.256	1.1787	0.00098304	0.0072685	--	sp|Q9SJ85|Y2474_ARATH BTB/POZ domain-containing protein At2g04740 OS=Arabidopsis thaliana GN=At2g04740 PE=2 SV=2//0
CSA002041	34.2678	164.223	-2.2607	7.0316e-05	0.00079272	--	sp|Q9BYX2|TBD2A_HUMAN TBC1 domain family member 2A OS=Homo sapiens GN=TBC1D2 PE=1 SV=3//3.35128e-52
CSA002047	66.8836	5.30466	3.6563	8.8626e-09	2.8319e-07	--	sp|P10978|POLX_TOBAC Retrovirus-related Pol polyprotein from transposon TNT 1-94 OS=Nicotiana tabacum PE=2 SV=1//9.05748e-133
CSA002054	8.04783	0	Inf	0.0039047	0.021947	--	-//-
CSA002061	153.316	1266.08	-3.0458	3.6506e-15	3.4465e-13	--	sp|Q9FVS9|C96AF_ARATH Alkane hydroxylase MAH1 OS=Arabidopsis thaliana GN=CYP96A15 PE=2 SV=1//8.71678e-89
CSA002062	36.7971	281.889	-2.9375	1.5375e-11	8.2081e-10	--	sp|Q9FVS9|C96AF_ARATH Alkane hydroxylase MAH1 OS=Arabidopsis thaliana GN=CYP96A15 PE=2 SV=1//3.15539e-26
CSA002064	273.388	104.726	1.3843	0.0054879	0.028799	--	sp|Q0IU52|ASP1_ORYSJ Aspartic proteinase Asp1 OS=Oryza sativa subsp. japonica GN=ASP1 PE=2 SV=1//5.31504e-64
CSA002066	7430.99	120.647	5.9447	3.8321e-30	2.4224e-27	--	-//-
CSA002075	29.6908	243.119	-3.0336	4.4724e-09	1.5169e-07	--	-//-
CSA002076	148.051	1092.19	-2.8831	5.8655e-14	4.8e-12	--	sp|Q9CAG8|FBK28_ARATH F-box/kelch-repeat protein At1g67480 OS=Arabidopsis thaliana GN=At1g67480 PE=2 SV=1//8.43656e-156
CSA002080	821.177	73.2722	3.4864	0.00010924	0.001154	--	sp|Q9LJM4|IKU2_ARATH Receptor-like protein kinase HAIKU2 OS=Arabidopsis thaliana GN=IKU2 PE=1 SV=1//0
CSA002090	12.8857	42.9376	-1.7365	0.0043905	0.024134	--	sp|Q9C7A2|Y3236_ARATH Ankyrin repeat-containing protein At3g12360 OS=Arabidopsis thaliana GN=At3g12360 PE=2 SV=1//2.15568e-177
CSA002093	102.34	341.595	-1.7389	0.0024493	0.015179	--	sp|Q9FI96|U76C3_ARATH UDP-glycosyltransferase 76C3 OS=Arabidopsis thaliana GN=UGT76C3 PE=3 SV=1//2.81815e-35
CSA002108	2744.84	51837	-4.2392	6.1436e-05	0.00070722	--	sp|P27141|CAHC_TOBAC Carbonic anhydrase, chloroplastic OS=Nicotiana tabacum PE=2 SV=1//2.31274e-151
CSA002114	145.485	3.67969	5.3051	5.0367e-10	2.0493e-08	--	sp|Q9SZN7|HIP26_ARATH Heavy metal-associated isoprenylated plant protein 26 OS=Arabidopsis thaliana GN=HIPP26 PE=1 SV=1//2.56054e-13
CSA002115	4107.48	908.752	2.1763	1.108e-09	4.2244e-08	--	sp|Q8RWF5|MATE9_ARATH MATE efflux family protein 9 OS=Arabidopsis thaliana GN=DTXL5 PE=2 SV=1//4.63458e-147
CSA002117	209.793	83.3354	1.332	0.010649	0.048385	--	sp|Q9LV58|MBF1C_ARATH Multiprotein-bridging factor 1c OS=Arabidopsis thaliana GN=MBF1C PE=1 SV=1//6.54511e-71
CSA002124	291.908	1133.02	-1.9566	3.0546e-06	5.2186e-05	--	sp|O82291|PAP3_ARATH Probable plastid-lipid-associated protein 3, chloroplastic OS=Arabidopsis thaliana GN=PAP3 PE=2 SV=1//2.10021e-105
CSA002133	66.8462	5.29346	3.6586	7.876e-06	0.00012045	--	sp|Q08IT1|DADIS_PANGI Dammarenediol II synthase OS=Panax ginseng GN=PNA PE=1 SV=1//0
CSA002139	34.4149	93.8427	-1.4472	0.0076222	0.037292	--	-//-
CSA002147	203.619	1092.34	-2.4235	1.2461e-10	5.6558e-09	--	sp|Q9SRL8|LBD21_ARATH LOB domain-containing protein 21 OS=Arabidopsis thaliana GN=LBD21 PE=2 SV=1//2.08297e-60
CSA002150	1025.88	489.59	1.0672	0.002472	0.015287	--	sp|Q84JP1|NFYA7_ARATH Nuclear transcription factor Y subunit A-7 OS=Arabidopsis thaliana GN=NFYA7 PE=2 SV=1//7.19511e-59
CSA002152	2543.24	284.158	3.1619	0.00043835	0.0037248	--	sp|Q9LW49|ERF4_NICSY Ethylene-responsive transcription factor 4 OS=Nicotiana sylvestris GN=ERF4 PE=2 SV=1//1.04261e-50
CSA002155	5937.4	1898.91	1.6447	0.00012732	0.0013153	--	sp|P0C883|SCL33_ARATH Scarecrow-like protein 33 OS=Arabidopsis thaliana GN=SCL33 PE=1 SV=1//1.30753e-168
CSA002179	445.354	213.622	1.0599	0.0046372	0.025273	--	-//-
CSA002180	483.011	212.44	1.185	0.0012516	0.0088697	--	sp|Q9ES53|UFD1_RAT Ubiquitin fusion degradation protein 1 homolog OS=Rattus norvegicus GN=Ufd1l PE=1 SV=1//3.18682e-75
CSA002186	2011.95	578.087	1.7992	0.0046966	0.025527	--	sp|B9DFA8|INVC_ARATH Alkaline/neutral invertase C, mitochondrial OS=Arabidopsis thaliana GN=INVC PE=1 SV=1//5.7791e-150
CSA002187	1947.1	560.438	1.7967	0.0048801	0.026262	--	sp|Q9FXA8|INVA_ARATH Alkaline/neutral invertase A, mitochondrial OS=Arabidopsis thaliana GN=INVA PE=1 SV=1//2.91491e-180
CSA002188	125.043	294.546	-1.2361	0.0012969	0.0091206	--	-//-
CSA002194	984.965	488.08	1.013	0.0038129	0.021537	--	-//-
CSA002200	5673.31	567.475	3.3216	8.4446e-07	1.6614e-05	--	sp|Q8RXU4|THA1_ARATH Probable low-specificity L-threonine aldolase 1 OS=Arabidopsis thaliana GN=THA1 PE=1 SV=1//0
CSA002207	1608.91	701.98	1.1966	0.00066437	0.0052639	--	sp|Q9S7P9|SNP33_ARATH SNAP25 homologous protein SNAP33 OS=Arabidopsis thaliana GN=SNAP33 PE=1 SV=1//2.47097e-111
CSA002212	555.437	3626.58	-2.7069	3.1835e-13	2.2876e-11	--	sp|Q9FN48|CAS_ARATH Calcium sensing receptor, chloroplastic OS=Arabidopsis thaliana GN=CAS PE=1 SV=1//2.81545e-175
CSA002218	6.58767	193.775	-4.8785	2.9901e-08	8.5353e-07	--	sp|Q2IV75|GUAA_RHOP2 GMP synthase [glutamine-hydrolyzing] OS=Rhodopseudomonas palustris (strain HaA2) GN=guaA PE=3 SV=1//6.18317e-34
CSA002229	1532.53	4352.93	-1.5061	0.0023111	0.014504	--	-//-
CSA002230	510.456	163.637	1.6413	1.5501e-05	0.00021539	--	-//-
CSA002238	2172.54	626.624	1.7937	5.2411e-07	1.0959e-05	--	sp|Q9SIZ4|Y2027_ARATH Inactive receptor-like serine/threonine-protein kinase At2g40270 OS=Arabidopsis thaliana GN=At2g40270 PE=2 SV=2//2.2026e-132
CSA002242	31.1392	97.4256	-1.6456	0.0005233	0.0043148	--	sp|Q8RXL8|Y1689_ARATH Uncharacterized membrane protein At1g06890 OS=Arabidopsis thaliana GN=At1g06890 PE=1 SV=1//2.00914e-28
CSA002254	75.7231	1545.03	-4.3508	4.3237e-16	4.6335e-14	--	sp|Q9LXU9|IRKI_ARATH IRK-interacting protein OS=Arabidopsis thaliana GN=IRKI PE=1 SV=1//0
CSA002256	117.635	322.486	-1.4549	0.00013358	0.0013696	--	sp|Q38879|TRXH2_ARATH Thioredoxin H2 OS=Arabidopsis thaliana GN=TRX2 PE=2 SV=2//2.07334e-39
CSA002295	49.2562	139.167	-1.4984	0.00056273	0.0045878	--	-//-
CSA002297	0	31.0093	#NAME?	0.00047748	0.0040028	--	-//-
CSA002309	47.0115	115.12	-1.292	0.0036798	0.020964	--	sp|Q9ZPX9|KIC_ARATH Calcium-binding protein KIC OS=Arabidopsis thaliana GN=KIC PE=1 SV=2//3.40735e-49
CSA002311	488.255	1075.08	-1.1387	0.0015202	0.010356	--	-//-
CSA002318	24747.5	387.243	5.9979	6.1899e-14	5.037e-12	--	sp|Q84J37|LAC15_ARATH Laccase-15 OS=Arabidopsis thaliana GN=TT10 PE=1 SV=1//7.99736e-83
CSA002320	3660.58	1705.84	1.1016	0.001528	0.010397	--	sp|P93207|14310_SOLLC 14-3-3 protein 10 OS=Solanum lycopersicum GN=TFT10 PE=2 SV=2//5.78012e-163
CSA002325	21.8273	68.4888	-1.6497	0.0017223	0.011425	--	sp|Q9SX27|PAN_ARATH Transcription factor PERIANTHIA OS=Arabidopsis thaliana GN=PAN PE=1 SV=1//1.5497e-134
CSA002344	35.1213	282.921	-3.01	5.0848e-05	0.00060039	--	sp|Q9SA72|Y1357_ARATH Probable receptor-like protein kinase At1g30570 OS=Arabidopsis thaliana GN=At1g30570 PE=3 SV=1//0
CSA002357	1203.15	155.662	2.9503	1.0012e-05	0.00014879	--	sp|Q7XKU5|DAO_ORYSJ 2-oxoglutarate-dependent dioxygenase DAO OS=Oryza sativa subsp. japonica GN=DAO PE=2 SV=2//2.23281e-109
CSA002358	13.8161	60.3154	-2.1262	0.0028011	0.016889	--	sp|F4K0A6|MYO2_ARATH Myosin-2 OS=Arabidopsis thaliana GN=VIII-2 PE=2 SV=1//0
CSA002361	2470.24	33392.1	-3.7568	1.1829e-08	3.6775e-07	--	sp|P27489|CB23_SOLLC Chlorophyll a-b binding protein 13, chloroplastic OS=Solanum lycopersicum GN=CAB13 PE=1 SV=1//1.23584e-165
CSA002363	1139.73	469.229	1.2803	0.00031906	0.0028477	--	sp|Q1ECE0|VAP41_ARATH Vesicle-associated protein 4-1 OS=Arabidopsis thaliana GN=PVA41 PE=2 SV=1//4.30214e-89
CSA002364	561.99	229.385	1.2928	0.00040993	0.0035218	--	-//-
CSA002379	293.38	60.2698	2.2833	2.7644e-08	7.9587e-07	--	sp|O64825|LYK4_ARATH LysM domain receptor-like kinase 4 OS=Arabidopsis thaliana GN=LYK4 PE=1 SV=1//8.08584e-168
CSA002380	428.011	13.1636	5.023	1.1957e-26	5.0632e-24	--	sp|O64825|LYK4_ARATH LysM domain receptor-like kinase 4 OS=Arabidopsis thaliana GN=LYK4 PE=1 SV=1//2.65376e-111
CSA002382	483.828	1140.92	-1.2376	0.00050236	0.0041672	--	sp|Q8W4F0|DAR1_ARATH Protein DA1-related 1 OS=Arabidopsis thaliana GN=DAR1 PE=1 SV=3//0
CSA002383	797.524	1785.16	-1.1625	0.00088251	0.0066493	--	sp|Q6Z3U3|Y7797_ORYSJ B3 domain-containing protein Os07g0679700 OS=Oryza sativa subsp. japonica GN=Os07g0679700 PE=2 SV=1//0
CSA002384	1047.18	420.121	1.3176	0.0010304	0.0075509	--	sp|Q9LFP7|Y5158_ARATH Probable receptor-like protein kinase At5g15080 OS=Arabidopsis thaliana GN=At5g15080 PE=2 SV=1//1.07362e-60
CSA002387	10720.3	60.8721	7.4603	4.9614e-60	5.41e-56	--	sp|A3BI11|ZIP8_ORYSJ Zinc transporter 8 OS=Oryza sativa subsp. japonica GN=ZIP8 PE=2 SV=1//2.20427e-34
CSA002390	172.127	775.782	-2.1722	4.2177e-06	6.9499e-05	--	sp|Q9M153|GDL61_ARATH GDSL esterase/lipase At4g01130 OS=Arabidopsis thaliana GN=At4g01130 PE=2 SV=1//2.07296e-84
CSA002407	309.632	115.34	1.4247	0.00025046	0.0023223	--	sp|Q9QZS2|RNF4_MOUSE E3 ubiquitin-protein ligase RNF4 OS=Mus musculus GN=Rnf4 PE=1 SV=1//4.877e-06
CSA002409	224.359	87.7653	1.3541	0.00075233	0.0058306	--	-//-
CSA002411	1576.95	346.08	2.188	2.8221e-05	0.00035981	--	sp|Q8GYN5|RIN4_ARATH RPM1-interacting protein 4 OS=Arabidopsis thaliana GN=RIN4 PE=1 SV=1//4.85131e-42
CSA002412	43.2915	194.152	-2.165	4.1405e-07	8.8876e-06	--	sp|Q7XIV8|HAK9_ORYSJ Probable potassium transporter 9 OS=Oryza sativa subsp. japonica GN=HAK9 PE=2 SV=1//8.24876e-24
CSA002413	11.1655	221.69	-4.3114	0.00011732	0.0012227	--	sp|Q84TH6|DIR23_ARATH Dirigent protein 23 OS=Arabidopsis thaliana GN=DIR23 PE=2 SV=1//2.67779e-49
CSA002426	954.633	427.533	1.1589	0.0012787	0.0090177	--	sp|P92792|TOM20_SOLTU Mitochondrial import receptor subunit TOM20 OS=Solanum tuberosum GN=TOM20 PE=1 SV=1//4.86874e-82
CSA002434	0	6.93755	#NAME?	0.0076608	0.037464	--	sp|P69781|GAT12_ARATH GATA transcription factor 12 OS=Arabidopsis thaliana GN=GATA12 PE=2 SV=1//9.62596e-81
CSA002435	216.999	449.628	-1.051	0.0043603	0.023998	--	sp|Q9SS47|PUM4_ARATH Pumilio homolog 4 OS=Arabidopsis thaliana GN=APUM4 PE=1 SV=2//1.86009e-08
CSA002439	2571.77	528.833	2.2819	3.753e-10	1.559e-08	--	sp|Q9SCW4|HFB2A_ARATH Heat stress transcription factor B-2a OS=Arabidopsis thaliana GN=HSFB2A PE=2 SV=1//7.28729e-88
CSA002445	4521.81	100.662	5.4893	3.8036e-10	1.577e-08	--	sp|Q9FKS8|LHT1_ARATH Lysine histidine transporter 1 OS=Arabidopsis thaliana GN=LHT1 PE=1 SV=1//0
CSA002449	54.8173	125.016	-1.1894	0.0059455	0.03061	--	sp|Q9LK27|GTE8_ARATH Transcription factor GTE8 OS=Arabidopsis thaliana GN=GTE8 PE=2 SV=2//5.76177e-90
CSA002453	3305.43	922.506	1.8412	2.2835e-07	5.2255e-06	--	sp|O94808|GFPT2_HUMAN Glutamine--fructose-6-phosphate aminotransferase [isomerizing] 2 OS=Homo sapiens GN=GFPT2 PE=1 SV=3//0
CSA002454	0.986288	65.1402	-6.0454	2.6588e-09	9.3676e-08	--	-//-
CSA002455	41.971	125.504	-1.5803	0.00071023	0.0055626	--	-//-
CSA002466	6663.39	3004.6	1.1491	0.00087433	0.0066002	--	sp|Q9LF46|HACL_ARATH 2-hydroxyacyl-CoA lyase OS=Arabidopsis thaliana GN=HACL PE=1 SV=1//0
CSA002468	1232.89	273.111	2.1745	4.702e-09	1.5874e-07	--	sp|Q9LXU9|IRKI_ARATH IRK-interacting protein OS=Arabidopsis thaliana GN=IRKI PE=1 SV=1//7.80908e-06
CSA002472	2857.13	16003.2	-2.4857	9.2013e-12	5.1222e-10	--	sp|Q9FNB0|CHLH_ARATH Magnesium-chelatase subunit ChlH, chloroplastic OS=Arabidopsis thaliana GN=CHLH PE=1 SV=1//0
CSA002478	236.629	561.448	-1.2465	0.00076196	0.0058968	--	sp|O58403|RACD_PYRHO Aspartate racemase OS=Pyrococcus horikoshii (strain ATCC 700860 / DSM 12428 / JCM 9974 / NBRC 100139 / OT-3) GN=PH0670 PE=1 SV=1//7.57772e-14
CSA002481	1066.85	494.979	1.1079	0.0019991	0.012884	--	sp|Q8W3K0|DRL9_ARATH Probable disease resistance protein At1g58602 OS=Arabidopsis thaliana GN=At1g58602 PE=2 SV=1//1.46394e-08
CSA002482	4.1962	74.2016	-4.1443	1.0594e-10	4.8488e-09	--	sp|P61430|SYCP2_ARATH Synaptonemal complex protein 2 OS=Arabidopsis thaliana GN=ZYP1B PE=2 SV=1//1.83203e-07
CSA002483	14.6919	145.241	-3.3054	2.7367e-11	1.3977e-09	--	sp|Q39090|UFO_ARATH Protein UNUSUAL FLORAL ORGANS OS=Arabidopsis thaliana GN=UFO PE=1 SV=2//2.65659e-12
CSA002484	161.231	52.2569	1.6254	0.00016472	0.0016373	--	sp|Q9LT81|C3H39_ARATH Zinc finger CCCH domain-containing protein 39 OS=Arabidopsis thaliana GN=At3g19360 PE=2 SV=1//4.73973e-40
CSA002486	4514.11	26.1429	7.4319	4.0437e-11	1.9825e-09	--	sp|E3SU11|ALL13_OLEEU Thaumatin-like protein OS=Olea europaea PE=1 SV=1//3.58788e-107
CSA002496	649.757	324.054	1.0037	0.0051802	0.027501	--	-//-
CSA002497	424.827	208.745	1.0251	0.0058009	0.03008	--	-//-
CSA002500	312.116	846.087	-1.4387	8.8787e-05	0.0009667	--	sp|Q9MB58|F26_ARATH 6-phosphofructo-2-kinase/fructose-2,6-bisphosphatase OS=Arabidopsis thaliana GN=FKFBP PE=1 SV=1//0
CSA002503	122.351	1661.78	-3.7636	0.0018814	0.01228	--	sp|P85524|KIRO_ACTDE Kirola OS=Actinidia deliciosa PE=1 SV=1//5.30275e-58
CSA002504	5.72169	98.1418	-4.1004	0.00022352	0.002113	--	sp|Q9FJV5|KAN4_ARATH Probable transcription factor KAN4 OS=Arabidopsis thaliana GN=KAN4 PE=1 SV=1//3.42576e-59
CSA002527	375.46	184.297	1.0266	0.0070433	0.035009	--	-//-
CSA002531	4832.99	1376.75	1.8117	4.1649e-07	8.9224e-06	--	sp|Q05737|YPTM2_MAIZE GTP-binding protein YPTM2 OS=Zea mays GN=YPTM2 PE=2 SV=1//8.62787e-133
CSA002537	5700.2	1893.58	1.5899	5.9001e-06	9.3614e-05	--	sp|Q05046|CH62_CUCMA Chaperonin CPN60-2, mitochondrial OS=Cucurbita maxima GN=CPN60-2 PE=1 SV=1//0
CSA002548	66.9791	332.07	-2.3097	1.978e-06	3.5489e-05	--	sp|Q2MHE4|HT1_ARATH Serine/threonine-protein kinase HT1 OS=Arabidopsis thaliana GN=HT1 PE=1 SV=1//6.76658e-60
CSA002549	874.781	3084.18	-1.8179	3.3182e-06	5.6205e-05	--	sp|Q9SSA5|CYP38_ARATH Peptidyl-prolyl cis-trans isomerase CYP38, chloroplastic OS=Arabidopsis thaliana GN=CYP38 PE=1 SV=1//0
CSA002550	119.925	812.13	-2.7596	0.00044892	0.0038005	--	sp|Q9M7J9|POT8_ARATH Potassium transporter 8 OS=Arabidopsis thaliana GN=POT8 PE=2 SV=2//0
CSA002551	10.6814	106.803	-3.3218	0.00025281	0.0023402	--	-//-
CSA002552	10.8121	88.8296	-3.0384	3.9934e-08	1.1078e-06	--	-//-
CSA002554	134.643	418.984	-1.6378	0.009184	0.043064	--	sp|Q9LT96|Y5977_ARATH Probable leucine-rich repeat receptor-like protein kinase At5g49770 OS=Arabidopsis thaliana GN=At5g49770 PE=2 SV=1//2.44303e-06
CSA002557	294.471	1927.61	-2.7106	0.00016081	0.0016047	--	sp|Q9LT96|Y5977_ARATH Probable leucine-rich repeat receptor-like protein kinase At5g49770 OS=Arabidopsis thaliana GN=At5g49770 PE=2 SV=1//1.94268e-45
CSA002561	469.745	99.1247	2.2446	2.0204e-05	0.0002704	--	sp|P09762|WIN2_SOLTU Wound-induced protein WIN2 OS=Solanum tuberosum GN=WIN2 PE=2 SV=1//8.52842e-70
CSA002571	1.8983	146.938	-6.2744	0.0029117	0.017436	--	sp|Q9XIA9|LACS2_ARATH Long chain acyl-CoA synthetase 2 OS=Arabidopsis thaliana GN=LACS2 PE=2 SV=1//3.34447e-11
CSA002574	1457.18	540.882	1.4298	7.1669e-05	0.00080567	--	sp|Q9SVL6|CRPM2_ARATH Cold-regulated 413 plasma membrane protein 2 OS=Arabidopsis thaliana GN=COR413PM2 PE=2 SV=1//3.55687e-65
CSA002575	909.924	339.135	1.4239	8.369e-05	0.00091993	--	sp|Q9FMN4|TCLOT_ARATH Thioredoxin-like protein Clot OS=Arabidopsis thaliana GN=At5g42850 PE=2 SV=1//1.36936e-52
CSA002579	90.0564	596.005	-2.7264	6.7955e-12	3.8796e-10	--	sp|P82277|RRP2_SPIOL 30S ribosomal protein 2, chloroplastic OS=Spinacia oleracea GN=PSRP2 PE=1 SV=1//1.48548e-06
CSA002580	0.316384	123.46	-8.6082	1.0855e-23	3.4063e-21	--	sp|Q8RXL8|Y1689_ARATH Uncharacterized membrane protein At1g06890 OS=Arabidopsis thaliana GN=At1g06890 PE=1 SV=1//1.74282e-134
CSA002582	5671.64	1051.1	2.4319	6.7162e-12	3.8545e-10	--	sp|Q9M0X5|CRK25_ARATH Cysteine-rich receptor-like protein kinase 25 OS=Arabidopsis thaliana GN=CRK25 PE=3 SV=1//1.79846e-170
CSA002601	26.5641	95.2814	-1.8427	0.0027531	0.016664	--	sp|O82318|Y2579_ARATH Probably inactive leucine-rich repeat receptor-like protein kinase At2g25790 OS=Arabidopsis thaliana GN=At2g25790 PE=2 SV=1//2.50474e-46
CSA002606	141.066	5.36654	4.7162	2.5266e-05	0.00032779	--	-//-
CSA002616	525.388	1537.93	-1.5495	0.0027078	0.016452	--	sp|Q8VWZ7|C76B6_CATRO Geraniol 8-hydroxylase OS=Catharanthus roseus GN=CYP76B6 PE=1 SV=1//0
CSA002624	552.909	69.6754	2.9883	7.8124e-07	1.5503e-05	--	sp|O64697|C7101_ARATH Cytochrome P450 710A1 OS=Arabidopsis thaliana GN=CYP710A1 PE=1 SV=1//0
CSA002626	3.22871	43.1225	-3.7394	0.0057754	0.029985	--	sp|Q84MA9|Y1063_ARATH Inactive leucine-rich repeat receptor-like serine/threonine-protein kinase At1g60630 OS=Arabidopsis thaliana GN=At1g60630 PE=2 SV=1//1.55301e-72
CSA002633	111.122	436.823	-1.9749	0.0098017	0.045327	--	sp|Q9M2Y6|Y3972_ARATH Uncharacterized protein At3g49720 OS=Arabidopsis thaliana GN=At3g49720 PE=2 SV=1//3.46479e-108
CSA002644	17.128	1.63155	3.392	0.0016457	0.011034	--	sp|Q9LY77|ACA12_ARATH Calcium-transporting ATPase 12, plasma membrane-type OS=Arabidopsis thaliana GN=ACA12 PE=2 SV=1//2.00516e-179
CSA002658	2.21469	15.7633	-2.8314	0.0068182	0.034144	--	-//-
CSA002666	584.817	106.402	2.4585	2.0526e-07	4.7319e-06	--	sp|Q9CAK1|RLM1B_ARATH Disease resistance protein RML1B OS=Arabidopsis thaliana GN=RLM1B PE=2 SV=1//3.30109e-57
CSA002682	23.9583	592.796	-4.6289	0.0038562	0.021733	--	sp|Q9S823|LNG2_ARATH Protein LONGIFOLIA 2 OS=Arabidopsis thaliana GN=LNG2 PE=1 SV=1//5.10507e-109
CSA002690	3939.65	488.557	3.0115	2.7501e-12	1.7359e-10	--	sp|Q9FNI6|SM3L2_ARATH Putative SWI/SNF-related matrix-associated actin-dependent regulator of chromatin subfamily A member 3-like 2 OS=Arabidopsis thaliana GN=At5g22750 PE=2 SV=1//1.46449e-97
CSA002692	2496.11	5475.73	-1.1334	0.0012309	0.0087427	--	sp|P32811|PHSH_SOLTU Alpha-glucan phosphorylase, H isozyme OS=Solanum tuberosum PE=1 SV=1//0
CSA002710	265.414	0.658149	8.6556	1.2572e-05	0.00018037	--	sp|Q9S763|WRK45_ARATH Probable WRKY transcription factor 45 OS=Arabidopsis thaliana GN=WRKY45 PE=2 SV=1//3.88011e-49
CSA002718	169.854	75.2204	1.1751	0.0053042	0.027968	--	-//-
CSA002722	374.175	175.506	1.0922	0.0033218	0.019355	--	-//-
CSA002725	12.4208	1.32288	3.231	0.0084487	0.040336	--	sp|Q3ECH2|Y1670_ARATH Probable receptor-like protein kinase At1g67000 OS=Arabidopsis thaliana GN=At1g67000 PE=2 SV=2//1.69599e-78
CSA002727	145.226	2.25547	6.0087	0.0047334	0.025663	--	sp|O80939|LRK41_ARATH L-type lectin-domain containing receptor kinase IV.1 OS=Arabidopsis thaliana GN=LECRK41 PE=2 SV=1//0
CSA002728	459.17	16.688	4.7821	1.965e-07	4.5613e-06	--	sp|Q9SZD5|LRK59_ARATH L-type lectin-domain containing receptor kinase V.9 OS=Arabidopsis thaliana GN=LECRK59 PE=2 SV=1//6.21712e-175
CSA002733	0	11.1839	#NAME?	0.00042064	0.0036024	--	-//-
CSA002734	9.81589	60.0396	-2.6127	0.00040843	0.0035131	--	sp|Q6AWY3|GRF6_ORYSJ Growth-regulating factor 6 OS=Oryza sativa subsp. japonica GN=GRF6 PE=2 SV=2//2.16106e-52
CSA002735	0	20.4736	#NAME?	0.007861	0.038144	--	sp|Q93VV5|PTR16_ARATH Protein NRT1/ PTR FAMILY 4.3 OS=Arabidopsis thaliana GN=NPF4.3 PE=2 SV=1//9.81784e-120
CSA002736	0.930356	26.2423	-4.818	0.0077562	0.03782	--	sp|Q56XQ6|PTR15_ARATH Protein NRT1/ PTR FAMILY 4.4 OS=Arabidopsis thaliana GN=NPF4.4 PE=2 SV=1//4.06954e-135
CSA002757	0.949152	182.439	-7.5866	2.5811e-26	1.0424e-23	--	sp|Q8LEE9|FLA12_ARATH Fasciclin-like arabinogalactan protein 12 OS=Arabidopsis thaliana GN=FLA12 PE=2 SV=2//9.53807e-66
CSA002762	3.80555	21.1805	-2.4766	0.0052873	0.027911	--	sp|Q9SF29|SYP71_ARATH Syntaxin-71 OS=Arabidopsis thaliana GN=SYP71 PE=1 SV=1//7.15844e-14
CSA002764	3874.8	54.4465	6.1531	3.2629e-15	3.1074e-13	--	sp|Q5UNY4|YL728_MIMIV Uncharacterized protein L728 OS=Acanthamoeba polyphaga mimivirus GN=MIMI_L728 PE=4 SV=1//4.20954e-60
CSA002766	559.898	113.229	2.3059	1.3808e-06	2.587e-05	--	sp|Q9SYK9|U74E2_ARATH UDP-glycosyltransferase 74E2 OS=Arabidopsis thaliana GN=UGT74E2 PE=1 SV=1//5.94827e-159
CSA002767	78.8075	1.02078	6.2706	1.0671e-06	2.0549e-05	--	-//-
CSA002768	811.254	4.17791	7.6012	5.5965e-07	1.1602e-05	--	sp|Q9FG33|LRKS5_ARATH Probable L-type lectin-domain containing receptor kinase S.5 OS=Arabidopsis thaliana GN=LECRKS5 PE=2 SV=1//0
CSA002777	120.224	259.201	-1.1084	0.0035956	0.0206	--	sp|Q8VYZ0|ORTH2_ARATH E3 ubiquitin-protein ligase ORTHRUS 2 OS=Arabidopsis thaliana GN=ORTH2 PE=1 SV=1//0
CSA002778	2997.82	6677.22	-1.1553	0.00097121	0.0071958	--	-//-
CSA002783	80.0511	4.72484	4.0826	0.00016344	0.0016272	--	sp|Q9ZUA5|VIT1_ARATH Vacuolar iron transporter 1 OS=Arabidopsis thaliana GN=VIT1 PE=2 SV=1//4.34488e-74
CSA002784	8.8489	154.823	-4.129	6.2382e-05	0.00071621	--	sp|Q8H157|PTR19_ARATH Protein NRT1/ PTR FAMILY 4.6 OS=Arabidopsis thaliana GN=NPF4.6 PE=1 SV=1//0
CSA002790	270.828	109.143	1.3112	0.00094128	0.0070085	--	-//-
CSA002810	668.945	2735.02	-2.0316	0.00016631	0.0016482	--	sp|Q9LSE4|CCB1_ARATH Protein COFACTOR ASSEMBLY OF COMPLEX C SUBUNIT B CCB1, chloroplastic OS=Arabidopsis thaliana GN=CCB1 PE=1 SV=1//8.93292e-80
CSA002820	986.926	370.508	1.4134	0.00014515	0.001472	--	sp|Q93ZQ5|SPXM3_ARATH SPX domain-containing membrane protein At4g22990 OS=Arabidopsis thaliana GN=At4g22990 PE=2 SV=2//0
CSA002829	609.473	269.889	1.1752	0.0010513	0.0076757	--	sp|Q8LPJ5|ICDHP_ARATH Isocitrate dehydrogenase [NADP], chloroplastic/mitochondrial OS=Arabidopsis thaliana GN=At5g14590 PE=2 SV=1//6.77324e-149
CSA002830	443.914	198.911	1.1582	0.0016787	0.011201	--	sp|Q8LPJ5|ICDHP_ARATH Isocitrate dehydrogenase [NADP], chloroplastic/mitochondrial OS=Arabidopsis thaliana GN=At5g14590 PE=2 SV=1//3.57058e-25
CSA002863	49.4012	13.4295	1.8791	0.0012219	0.0086858	--	-//-
CSA002865	440.019	1247.44	-1.5033	4.8081e-05	0.00057205	--	sp|Q9ASV6|RR20_ARATH 30S ribosomal protein S20, chloroplastic OS=Arabidopsis thaliana GN=RPS20 PE=2 SV=1//1.85086e-37
CSA002876	65.8117	3.76131	4.129	5.5329e-06	8.8535e-05	--	-//-
CSA002884	64041.5	5815.61	3.461	6.456e-21	1.408e-18	--	sp|P48147|PPCE_HUMAN Prolyl endopeptidase OS=Homo sapiens GN=PREP PE=1 SV=2//0
CSA002896	224.288	565.239	-1.3335	0.00037381	0.0032635	--	sp|Q9SMM0|PGMP_BRANA Phosphoglucomutase, chloroplastic OS=Brassica napus GN=PGMP PE=2 SV=1//3.85453e-33
CSA002897	5.97275	53.9569	-3.1753	7.1621e-07	1.4349e-05	--	sp|Q9FFD5|RIC4_ARATH CRIB domain-containing protein RIC4 OS=Arabidopsis thaliana GN=RIC4 PE=1 SV=1//1.8216e-25
CSA002900	133.539	0.349478	8.5778	2.0668e-05	0.00027576	--	sp|Q9LGE3|FLP1_ORYSJ Flowering-promoting factor 1-like protein 1 OS=Oryza sativa subsp. japonica GN=RAA1 PE=1 SV=1//6.57415e-44
CSA002901	818.864	40.2977	4.3449	8.1364e-11	3.7875e-09	--	sp|O23429|VA724_ARATH Vesicle-associated membrane protein 724 OS=Arabidopsis thaliana GN=VAMP724 PE=2 SV=2//5.2316e-102
CSA002907	301.799	8.44205	5.1598	1.5644e-07	3.7247e-06	--	sp|Q9LY77|ACA12_ARATH Calcium-transporting ATPase 12, plasma membrane-type OS=Arabidopsis thaliana GN=ACA12 PE=2 SV=1//0
CSA002929	135.909	9.17852	3.8882	3.4733e-13	2.4795e-11	--	-//-
CSA002942	4.44772	51.5902	-3.536	0.0065129	0.032929	--	sp|Q38774|CDC2C_ANTMA Cell division control protein 2 homolog C OS=Antirrhinum majus GN=CDC2C PE=2 SV=1//9.04305e-101
CSA002945	4489.94	424.238	3.4038	2.3194e-19	3.9673e-17	--	sp|P43187|ALLB3_BETPN Calcium-binding allergen Bet v 3 OS=Betula pendula GN=BETVIII PE=1 SV=1//1.98023e-62
CSA002948	1406.99	7593.46	-2.4321	2.6605e-05	0.00034191	--	sp|Q941L0|CESA3_ARATH Cellulose synthase A catalytic subunit 3 [UDP-forming] OS=Arabidopsis thaliana GN=CESA3 PE=1 SV=2//0
CSA002949	8.04829	62.5444	-2.9581	0.0011663	0.008368	--	sp|Q9LJK2|ABAH4_ARATH Abscisic acid 8&apos;-hydroxylase 4 OS=Arabidopsis thaliana GN=CYP707A4 PE=2 SV=2//0
CSA002951	178.726	647.257	-1.8566	1.8269e-05	0.00024877	--	sp|Q9C5C5|TRL4_ARATH Thioredoxin-like 4, chloroplastic OS=Arabidopsis thaliana GN=At1g07700 PE=2 SV=1//2.38004e-66
CSA002961	2634.57	370.606	2.8296	1.4706e-06	2.7423e-05	--	sp|Q9ZSD4|SY121_ARATH Syntaxin-121 OS=Arabidopsis thaliana GN=SYP121 PE=1 SV=1//1.59354e-134
CSA002967	745.88	2384.71	-1.6768	4.4556e-05	0.00053537	--	sp|Q570R7|PIF7_ARATH Transcription factor PIF7 OS=Arabidopsis thaliana GN=BHLH72 PE=1 SV=2//6.5213e-07
CSA002971	382.617	67.7194	2.4983	6.888e-05	0.00077894	--	sp|I7C6E8|C7A52_PANGI Beta-amyrin 28-oxidase OS=Panax ginseng PE=2 SV=1//5.61311e-137
CSA002974	7729.93	21355.3	-1.4661	0.003205	0.018817	--	sp|Q74H67|TOLB_GEOSL Protein TolB OS=Geobacter sulfurreducens (strain ATCC 51573 / DSM 12127 / PCA) GN=tolB PE=3 SV=1//5.27929e-07
CSA002981	70.5699	176.2	-1.3201	0.0026706	0.016271	--	-//-
CSA002989	509.301	99.6961	2.3529	0.009624	0.044671	--	sp|Q9SKC1|U74C1_ARATH UDP-glycosyltransferase 74C1 OS=Arabidopsis thaliana GN=UGT74C1 PE=2 SV=1//6.98736e-95
CSA002991	0.949152	15.6639	-4.0447	0.0008459	0.0064146	--	sp|Q9SJE2|FATB_ARATH Palmitoyl-acyl carrier protein thioesterase, chloroplastic OS=Arabidopsis thaliana GN=FATB PE=1 SV=1//5.78778e-107
CSA003003	115.829	3.49015	5.0526	2.9738e-16	3.2755e-14	--	sp|P51091|LDOX_MALDO Leucoanthocyanidin dioxygenase OS=Malus domestica GN=ANS PE=2 SV=1//1.54163e-78
CSA003007	208.684	600.446	-1.5247	3.8667e-05	0.00047229	--	sp|Q8W4I7|CDPKD_ARATH Calcium-dependent protein kinase 13 OS=Arabidopsis thaliana GN=CPK13 PE=1 SV=2//0
CSA003009	3.33072	61.3874	-4.204	0.001754	0.011593	--	sp|P0CV94|NES1_FRAAN (3S,6E)-nerolidol synthase 1 OS=Fragaria ananassa PE=1 SV=1//3.69504e-80
CSA003039	1758.53	68.6283	4.6794	2.7294e-18	4.0084e-16	--	sp|Q9ZUZ3|SAU32_ARATH Auxin-responsive protein SAUR32 OS=Arabidopsis thaliana GN=SAUR32 PE=2 SV=1//2.52255e-34
CSA003044	1019.01	241.795	2.0753	1.5362e-08	4.6857e-07	--	sp|Q9FIM9|CAMK4_ARATH CDPK-related kinase 4 OS=Arabidopsis thaliana GN=CRK4 PE=2 SV=1//0
CSA003045	1304.19	386.738	1.7537	1.1237e-06	2.1506e-05	--	-//-
CSA003060	10360.1	40255.4	-1.9581	2.9412e-08	8.4122e-07	--	sp|O24370|LOX21_SOLTU Linoleate 13S-lipoxygenase 2-1, chloroplastic OS=Solanum tuberosum GN=LOX2.1 PE=1 SV=1//0
CSA003064	1106.74	282.709	1.9689	1.8817e-07	4.389e-06	--	sp|Q9SZL8|FRS5_ARATH Protein FAR1-RELATED SEQUENCE 5 OS=Arabidopsis thaliana GN=FRS5 PE=2 SV=1//1.97668e-14
CSA003069	1127.85	367.115	1.6193	1.9793e-05	0.00026597	--	sp|Q39202|RLK1_ARATH G-type lectin S-receptor-like serine/threonine-protein kinase RLK1 OS=Arabidopsis thaliana GN=RLK1 PE=2 SV=2//5.81007e-129
CSA003073	463.632	1282.73	-1.4682	4.4433e-05	0.00053404	--	sp|A8MS68|PLPD1_ARATH Dihydrolipoyl dehydrogenase 1, chloroplastic OS=Arabidopsis thaliana GN=LPD1 PE=2 SV=1//0
CSA003076	17.025	0.349478	5.6063	0.0011025	0.0079827	--	-//-
CSA003089	19.5186	133.657	-2.7756	7.7942e-05	0.00086415	--	sp|Q5W274|PDR3_TOBAC Pleiotropic drug resistance protein 3 OS=Nicotiana tabacum GN=PDR3 PE=2 SV=1//1.05797e-08
CSA003102	207.822	451.736	-1.1201	0.0027033	0.016432	--	sp|Q6H668|YAB4_ORYSJ Protein YABBY 4 OS=Oryza sativa subsp. japonica GN=YAB4 PE=2 SV=1//8.56459e-29
CSA003103	0	14.8866	#NAME?	3.1481e-05	0.00039662	--	sp|Q9SVQ1|YUC2_ARATH Indole-3-pyruvate monooxygenase YUCCA2 OS=Arabidopsis thaliana GN=YUC2 PE=1 SV=1//0
CSA003104	4.66113	30.5973	-2.7147	0.00029933	0.0027026	--	-//-
CSA003106	1079.37	152.742	2.821	1.3892e-05	0.00019673	--	sp|Q9LP56|WRK65_ARATH Probable WRKY transcription factor 65 OS=Arabidopsis thaliana GN=WRKY65 PE=2 SV=1//2.44478e-62
CSA003116	4.15907	21.1055	-2.3433	0.0071703	0.035483	--	-//-
CSA003117	646.115	161.706	1.9984	0.0014512	0.01001	--	sp|Q8GXC7|FBK50_ARATH F-box/kelch-repeat protein At3g06240 OS=Arabidopsis thaliana GN=At3g06240 PE=2 SV=1//1.73119e-25
CSA003118	1694.56	4026.97	-1.2488	0.00042426	0.003627	--	sp|P48496|TPIC_SPIOL Triosephosphate isomerase, chloroplastic OS=Spinacia oleracea GN=TPIP1 PE=1 SV=1//3.43602e-155
CSA003124	0.316384	122.382	-8.5955	1.6393e-11	8.6986e-10	--	sp|Q7Z9L3|EXGA_ASPOR Glucan 1,3-beta-glucosidase A OS=Aspergillus oryzae (strain ATCC 42149 / RIB 40) GN=exgA PE=1 SV=1//7.80113e-43
CSA003142	720.154	14.7984	5.6048	2.4819e-24	8.2011e-22	--	sp|O49459|NAC73_ARATH NAC domain-containing protein 73 OS=Arabidopsis thaliana GN=NAC073 PE=2 SV=1//2.31058e-18
CSA003145	20.9989	89.6173	-2.0935	2.7961e-05	0.0003567	--	-//-
CSA003147	8.35527	253.43	-4.9228	1.6415e-22	4.3393e-20	--	sp|F4IH21|TBL33_ARATH Protein trichome birefringence-like 33 OS=Arabidopsis thaliana GN=TBL33 PE=2 SV=1//0
CSA003150	1.36755	14.0732	-3.3633	0.003068	0.018184	--	sp|Q8GWW6|4MMP_ARATH Metalloendoproteinase 4-MMP OS=Arabidopsis thaliana GN=4MMP PE=1 SV=1//2.34127e-110
CSA003155	2636.39	488.968	2.4308	0.0043082	0.023771	--	sp|Q9LXM2|CAF1I_ARATH Probable CCR4-associated factor 1 homolog 9 OS=Arabidopsis thaliana GN=CAF1-9 PE=2 SV=1//3.50295e-140
CSA003158	13.1372	163.739	-3.6397	0.00030843	0.002765	--	sp|P42751|CCD11_ARATH Cyclin-D1-1 OS=Arabidopsis thaliana GN=CYCD1-1 PE=1 SV=3//2.62755e-107
CSA003163	122.927	2.80107	5.4557	5.4473e-07	1.133e-05	--	-//-
CSA003170	5.54495	26.755	-2.2706	0.0029672	0.017717	--	sp|Q6S9E0|TTP_SHEEP Tristetraprolin OS=Ovis aries GN=ZFP36 PE=2 SV=1//1.73111e-09
CSA003181	28.0632	260.887	-3.2167	0.00042153	0.0036079	--	sp|Q0WSY2|FPP4_ARATH Filament-like plant protein 4 OS=Arabidopsis thaliana GN=FPP4 PE=1 SV=1//0
CSA003188	93.1224	207.431	-1.1554	0.0046225	0.025209	--	-//-
CSA003197	133.367	313.943	-1.2351	0.0016935	0.01127	--	sp|Q02166|TRPD_ARATH Anthranilate phosphoribosyltransferase, chloroplastic OS=Arabidopsis thaliana GN=PAT1 PE=2 SV=1//2.15387e-165
CSA003210	0	7.44563	#NAME?	0.005022	0.026863	--	sp|Q6S591|JAG_ARATH Zinc finger protein JAGGED OS=Arabidopsis thaliana GN=JAG PE=2 SV=1//1.2678e-29
CSA003213	542.244	2614.3	-2.2694	6.1111e-10	2.4409e-08	--	sp|Q9THX6|TL29_SOLLC Thylakoid lumenal 29 kDa protein, chloroplastic OS=Solanum lycopersicum GN=CLEB3J9 PE=3 SV=1//7.00228e-143
CSA003221	1464.69	362.817	2.0133	0.00019087	0.0018537	--	sp|Q9LIG0|Y3136_ARATH Clavaminate synthase-like protein At3g21360 OS=Arabidopsis thaliana GN=At3g21360 PE=1 SV=1//5.34823e-63
CSA003222	5560.22	983.445	2.4992	5.5872e-12	3.2894e-10	--	sp|Q9XF23|EDS1L_ARATH Protein EDS1L OS=Arabidopsis thaliana GN=EDS1 PE=1 SV=1//5.17362e-146
CSA003224	6.16878	52.7275	-3.0955	1.9041e-06	3.4418e-05	--	sp|O04539|SNL4_ARATH Paired amphipathic helix protein Sin3-like 4 OS=Arabidopsis thaliana GN=SNL4 PE=3 SV=3//1.427e-15
CSA003225	13.0164	711.874	-5.7732	2.3348e-06	4.1063e-05	--	sp|Q680C0|GDL62_ARATH GDSL esterase/lipase At4g10955 OS=Arabidopsis thaliana GN=At4g10955 PE=2 SV=1//7.41224e-149
CSA003226	1.97258	76.5025	-5.2774	6.9757e-07	1.4021e-05	--	-//-
CSA003236	640.311	1287.8	-1.0081	0.0036067	0.020647	--	sp|Q5S2C3|PIR_ARATH Protein PIR OS=Arabidopsis thaliana GN=PIR PE=1 SV=2//0
CSA003240	112.428	280.72	-1.3201	0.00079572	0.0061018	--	sp|Q9FMU2|PP380_ARATH Pentatricopeptide repeat-containing protein At5g14080 OS=Arabidopsis thaliana GN=At5g14080 PE=2 SV=2//0
CSA003244	684.929	338.231	1.0179	0.0049614	0.026624	--	sp|Q56YP2|PI5K1_ARATH Phosphatidylinositol 4-phosphate 5-kinase 1 OS=Arabidopsis thaliana GN=PIP5K1 PE=1 SV=1//8.7595e-22
CSA003267	641.627	3126.79	-2.2849	3.4809e-10	1.4557e-08	--	sp|Q8VYJ1|MENE_ARATH 2-succinylbenzoate--CoA ligase, chloroplastic/peroxisomal OS=Arabidopsis thaliana GN=AAE14 PE=1 SV=1//8.31089e-177
CSA003272	10.2615	95.4775	-3.2179	0.0067392	0.033833	--	sp|P52410|KASC1_ARATH 3-oxoacyl-[acyl-carrier-protein] synthase I, chloroplastic OS=Arabidopsis thaliana GN=KAS1 PE=2 SV=2//0
CSA003274	10.7458	55.8946	-2.3789	0.0098323	0.045419	--	sp|Q8LPQ8|MSSP2_ARATH Monosaccharide-sensing protein 2 OS=Arabidopsis thaliana GN=MSSP2 PE=1 SV=2//0
CSA003293	12.654	47.1385	-1.8973	0.0037543	0.021275	--	-//-
CSA003295	157.423	449.026	-1.5122	0.0055006	0.028844	--	sp|O64556|Y2923_ARATH Putative leucine-rich repeat receptor-like serine/threonine-protein kinase At2g19230 OS=Arabidopsis thaliana GN=At2g19230 PE=3 SV=3//1.32094e-13
CSA003302	333.172	7.50617	5.472	5.9413e-10	2.3755e-08	--	-//-
CSA003303	165.84	5.36654	4.9497	1.3018e-06	2.459e-05	--	sp|Q4R1I9|ANGLT_ROSHC Anthocyanidin 5,3-O-glucosyltransferase OS=Rosa hybrid cultivar GN=RhGT1 PE=2 SV=1//1.55161e-57
CSA003306	81.5468	513.349	-2.6542	7.1765e-05	0.00080595	--	sp|B8XCH5|QKY_ARATH Protein QUIRKY OS=Arabidopsis thaliana GN=QKY PE=2 SV=1//0
CSA003311	5224.49	1317.08	1.9879	2.5389e-08	7.3582e-07	--	sp|P56331|IF1A_ONOVI Eukaryotic translation initiation factor 1A OS=Onobrychis viciifolia PE=2 SV=2//7.07191e-62
CSA003313	40.0346	190.5	-2.2505	0.00050572	0.0041888	--	sp|Q9YHB5|CND3_XENLA Condensin complex subunit 3 OS=Xenopus laevis GN=ncapg PE=1 SV=1//6.43121e-35
CSA003315	498.395	32711.6	-6.0364	3.6207e-11	1.7885e-09	--	sp|Q9SB81|PER42_ARATH Peroxidase 42 OS=Arabidopsis thaliana GN=PER42 PE=1 SV=2//0
CSA003316	2.25182	164.579	-6.1915	4.0085e-09	1.367e-07	--	-//-
CSA003318	1398.7	494.486	1.5001	0.00019662	0.0018969	--	sp|Q9FID6|Y5392_ARATH Probable receptor-like protein kinase At5g39020 OS=Arabidopsis thaliana GN=At5g39020 PE=2 SV=1//2.17713e-107
CSA003319	64.461	607.283	-3.2359	2.8989e-07	6.4545e-06	--	sp|Q9SX98|LHTL8_ARATH Lysine histidine transporter-like 8 OS=Arabidopsis thaliana GN=AATL1 PE=1 SV=1//0
CSA003325	421.274	184.847	1.1884	0.0015526	0.010529	--	sp|Q9LUL8|PME26_ARATH Putative pectinesterase/pectinesterase inhibitor 26 OS=Arabidopsis thaliana GN=PME26 PE=2 SV=1//1.03799e-09
CSA003326	1364.93	5623.74	-2.0427	1.1582e-08	3.6057e-07	--	sp|Q9SW18|CHLM_ARATH Magnesium protoporphyrin IX methyltransferase, chloroplastic OS=Arabidopsis thaliana GN=CHLM PE=1 SV=1//3.2288e-142
CSA003333	313.883	148.966	1.0752	0.0052537	0.027782	--	sp|P56286|IF2A_SCHPO Eukaryotic translation initiation factor 2 subunit alpha OS=Schizosaccharomyces pombe (strain 972 / ATCC 24843) GN=tif211 PE=1 SV=1//5.31455e-95
CSA003337	602.834	224.329	1.4261	0.00013153	0.0013505	--	-//-
CSA003343	2095.91	73.4142	4.8354	1.6841e-11	8.8929e-10	--	-//-
CSA003357	2435.68	171.667	3.8266	9.4844e-23	2.6018e-20	--	sp|O95372|LYPA2_HUMAN Acyl-protein thioesterase 2 OS=Homo sapiens GN=LYPLA2 PE=1 SV=1//2.45223e-31
CSA003359	61.5451	211.629	-1.7818	1.6425e-05	0.00022671	--	sp|Q9LW15|CX5B1_ARATH Cytochrome c oxidase subunit 5b-1, mitochondrial OS=Arabidopsis thaliana GN=COX5B-1 PE=2 SV=1//2.15807e-42
CSA003361	23.4924	77.1862	-1.7161	0.00067468	0.0053282	--	-//-
CSA003364	0.306986	74.3128	-7.9193	0.0091021	0.042757	--	sp|Q9SK52|PER18_ARATH Peroxidase 18 OS=Arabidopsis thaliana GN=PER18 PE=3 SV=1//1.49074e-142
CSA003372	86.1953	243.596	-1.4988	0.0026256	0.016055	--	sp|O82188|RDR5_ARATH Probable RNA-dependent RNA polymerase 5 OS=Arabidopsis thaliana GN=RDR5 PE=2 SV=2//1.11866e-131
CSA003378	708.672	232.414	1.6084	9.681e-06	0.00014451	--	sp|Q9ZQ70|WRKY3_ARATH Probable WRKY transcription factor 3 OS=Arabidopsis thaliana GN=WRKY3 PE=2 SV=1//3.65713e-19
CSA003379	824.573	289.098	1.5121	2.7608e-05	0.00035277	--	sp|Q9XI90|WRKY4_ARATH Probable WRKY transcription factor 4 OS=Arabidopsis thaliana GN=WRKY4 PE=1 SV=2//4.44191e-26
CSA003383	1165.76	3992.97	-1.7762	0.00021264	0.0020241	--	sp|Q8GX78|ANTR2_ARATH Ascorbate transporter, chloroplastic OS=Arabidopsis thaliana GN=PHT4;4 PE=1 SV=1//0
CSA003388	5024.05	1439.51	1.8033	3.4373e-07	7.5225e-06	--	sp|Q9LTW0|ALIS1_ARATH ALA-interacting subunit 1 OS=Arabidopsis thaliana GN=ALIS1 PE=1 SV=1//5.99191e-172
CSA003404	349.972	6652.71	-4.2486	1.9855e-15	1.9244e-13	--	sp|O49675|CCD4_ARATH Probable carotenoid cleavage dioxygenase 4, chloroplastic OS=Arabidopsis thaliana GN=CCD4 PE=1 SV=1//4.31151e-63
CSA003405	130.894	2605.03	-4.3148	2.6643e-16	2.9721e-14	--	sp|O49675|CCD4_ARATH Probable carotenoid cleavage dioxygenase 4, chloroplastic OS=Arabidopsis thaliana GN=CCD4 PE=1 SV=1//5.43084e-53
CSA003406	284.762	6286.73	-4.4645	4.9583e-14	4.1115e-12	--	sp|O49675|CCD4_ARATH Probable carotenoid cleavage dioxygenase 4, chloroplastic OS=Arabidopsis thaliana GN=CCD4 PE=1 SV=1//9.82464e-131
CSA003412	0.316384	9.25685	-4.8708	0.0059876	0.03079	--	sp|Q8LFA9|METL2_ARATH Methyltransferase-like protein 2 OS=Arabidopsis thaliana GN=At1g19340 PE=2 SV=2//8.30803e-12
CSA003418	924.171	162.458	2.5081	3.5049e-11	1.7392e-09	--	sp|B9F655|PIRL7_ORYSJ Plant intracellular Ras-group-related LRR protein 7 OS=Oryza sativa subsp. japonica GN=IRL7 PE=2 SV=1//2.9905e-121
CSA003425	66.3903	3.57835	4.2136	3.2385e-08	9.1545e-07	--	sp|Q53Q11|P2C74_ORYSJ Probable protein phosphatase 2C 74 OS=Oryza sativa subsp. japonica GN=Os11g0242200 PE=3 SV=1//1.2848e-32
CSA003427	20.5255	149.29	-2.8626	0.0028727	0.017247	--	sp|Q93ZQ3|PLP9_ARATH Probable inactive patatin-like protein 9 OS=Arabidopsis thaliana GN=PLP9 PE=2 SV=1//0
CSA003431	144.454	399.544	-1.4677	0.00010448	0.0011128	--	sp|Q9M1X2|FAP1_ARATH Fatty-acid-binding protein 1 OS=Arabidopsis thaliana GN=FAP1 PE=1 SV=1//6.60663e-93
CSA003441	303.097	18.4729	4.0363	0.0030798	0.018231	--	sp|Q9LDE1|MY108_ARATH Transcription factor MYB108 OS=Arabidopsis thaliana GN=MYB108 PE=1 SV=1//3.88817e-57
CSA003445	114.343	910.376	-2.9931	4.851e-07	1.0212e-05	--	sp|Q0WT19|IP5P8_ARATH Type I inositol polyphosphate 5-phosphatase 8 OS=Arabidopsis thaliana GN=IP5P8 PE=2 SV=1//1.9019e-101
CSA003470	24.748	1.85203	3.7401	0.00010015	0.0010737	--	-//-
CSA003472	849.38	2227.12	-1.3907	0.0022261	0.014088	--	sp|Q9M0B6|GAE1_ARATH UDP-glucuronate 4-epimerase 1 OS=Arabidopsis thaliana GN=GAE1 PE=1 SV=1//0
CSA003500	134.624	38.9308	1.79	6.2327e-05	0.00071578	--	sp|O95208|EPN2_HUMAN Epsin-2 OS=Homo sapiens GN=EPN2 PE=1 SV=3//5.58057e-14
CSA003501	84.7561	30.3985	1.4793	0.0031221	0.01845	--	sp|P0C6E7|PUB55_ARATH Putative U-box domain-containing protein 55 OS=Arabidopsis thaliana GN=PUB55 PE=3 SV=1//1.0783e-23
CSA003502	854.015	316.305	1.4329	0.00029356	0.0026559	--	sp|Q8GUH1|PUB33_ARATH U-box domain-containing protein 33 OS=Arabidopsis thaliana GN=PUB33 PE=2 SV=2//7.72993e-80
CSA003504	867.168	3912.77	-2.1738	1.3488e-09	5.0456e-08	--	sp|Q94B55|XB31_ARATH Putative E3 ubiquitin-protein ligase XBAT31 OS=Arabidopsis thaliana GN=XBAT31 PE=2 SV=1//0
CSA003508	95.0751	218.206	-1.1986	0.0023052	0.014482	--	sp|Q54RS7|ELMOC_DICDI ELMO domain-containing protein C OS=Dictyostelium discoideum GN=elmoC PE=3 SV=1//6.62596e-06
CSA003509	46557.5	816.575	5.8333	0.0050645	0.027051	--	sp|O04138|CHI4_ORYSJ Chitinase 4 OS=Oryza sativa subsp. japonica GN=Cht4 PE=2 SV=2//4.36204e-99
CSA003511	1995.99	52.5852	5.2463	1.2961e-07	3.1511e-06	--	sp|Q6K8R2|CHI6_ORYSJ Chitinase 6 OS=Oryza sativa subsp. japonica GN=Cht6 PE=2 SV=1//1.25818e-26
CSA003522	1629.77	796.133	1.0336	0.0026807	0.016316	--	sp|Q9LEU7|CIPK5_ARATH CBL-interacting serine/threonine-protein kinase 5 OS=Arabidopsis thaliana GN=CIPK5 PE=2 SV=1//0
CSA003524	733.857	248.264	1.5636	0.0049745	0.026681	--	sp|Q9FID6|Y5392_ARATH Probable receptor-like protein kinase At5g39020 OS=Arabidopsis thaliana GN=At5g39020 PE=2 SV=1//9.51009e-95
CSA003556	9.73176	69.4682	-2.8356	7.4158e-07	1.4797e-05	--	sp|B9DHD7|VAP22_ARATH Vesicle-associated protein 2-2 OS=Arabidopsis thaliana GN=PVA22 PE=1 SV=1//3.02961e-53
CSA003557	693.378	302.638	1.196	0.00091028	0.0068184	--	sp|Q9FDZ9|RL212_ARATH 60S ribosomal protein L21-2 OS=Arabidopsis thaliana GN=RPL21E PE=2 SV=1//2.78563e-101
CSA003558	4375.68	1721.81	1.3456	0.00016479	0.0016373	--	sp|Q56XP4|NHX2_ARATH Sodium/hydrogen exchanger 2 OS=Arabidopsis thaliana GN=NHX2 PE=2 SV=2//0
CSA003563	174.548	363.631	-1.0589	0.0049888	0.026732	--	-//-
CSA003565	31.9765	5.35205	2.5788	0.0005136	0.0042444	--	sp|Q6Z9C8|HFB2B_ORYSJ Heat stress transcription factor B-2b OS=Oryza sativa subsp. japonica GN=HSFB2B PE=2 SV=1//9.90842e-17
CSA003568	0.316384	12.9445	-5.3545	0.0050287	0.026889	--	sp|Q3ECP7|ERDL5_ARATH Sugar transporter ERD6-like 5 OS=Arabidopsis thaliana GN=At1g54730 PE=2 SV=2//8.46852e-96
CSA003570	17.3066	316.112	-4.191	1.1654e-11	6.3458e-10	--	sp|O81016|AB32G_ARATH ABC transporter G family member 32 OS=Arabidopsis thaliana GN=ABCG32 PE=1 SV=1//0
CSA003594	36.1648	161.797	-2.1615	1.5201e-06	2.821e-05	--	-//-
CSA003597	216.333	480.216	-1.1504	0.0014746	0.010113	--	sp|Q93VG8|PPDEX_ARATH DeSI-like protein At4g17486 OS=Arabidopsis thaliana GN=At4g17486 PE=2 SV=1//3.22926e-70
CSA003598	73.3185	395.623	-2.4319	1.612e-09	5.9284e-08	--	sp|Q8L7W2|NUDT8_ARATH Nudix hydrolase 8 OS=Arabidopsis thaliana GN=NUDT8 PE=2 SV=2//7.80735e-144
CSA003608	9.23859	135.596	-3.8755	0.0014233	0.0098525	--	sp|Q9FZP1|HPSE3_ARATH Heparanase-like protein 3 OS=Arabidopsis thaliana GN=At5g34940 PE=2 SV=2//0
CSA003610	529.01	174.635	1.599	1.849e-05	0.00025105	--	-//-
CSA003615	115.937	541.408	-2.2234	2.7613e-08	7.9587e-07	--	sp|Q8RY82|FB121_ARATH F-box protein At2g32560 OS=Arabidopsis thaliana GN=At2g32560 PE=2 SV=1//3.40905e-138
CSA003620	2515.75	852.716	1.5609	9.504e-06	0.00014206	--	sp|Q96EP0|RNF31_HUMAN E3 ubiquitin-protein ligase RNF31 OS=Homo sapiens GN=RNF31 PE=1 SV=1//1.42196e-08
CSA003629	0.986288	37.2782	-5.2402	0.0040954	0.0228	--	sp|Q9LHD1|AB15B_ARATH ABC transporter B family member 15 OS=Arabidopsis thaliana GN=ABCB15 PE=3 SV=1//6.11561e-16
CSA003630	0	7.82933	#NAME?	0.003886	0.021865	--	sp|Q9LHD1|AB15B_ARATH ABC transporter B family member 15 OS=Arabidopsis thaliana GN=ABCB15 PE=3 SV=1//5.29256e-34
CSA003649	130.45	461.724	-1.8235	0.0022352	0.014132	--	-//-
CSA003650	70.5516	273.651	-1.9556	0.00032951	0.0029289	--	sp|Q9T0P4|GLTB2_ARATH Ferredoxin-dependent glutamate synthase 2, chloroplastic OS=Arabidopsis thaliana GN=GLU2 PE=1 SV=2//5.75327e-56
CSA003651	204.195	697.282	-1.7718	0.0073974	0.03638	--	sp|Q08258|GLTB_HORVU Ferredoxin-dependent glutamate synthase (Fragment) OS=Hordeum vulgare PE=1 SV=2//2.07897e-104
CSA003652	96.1768	290.307	-1.5938	0.0064623	0.03271	--	sp|Q9ZNZ7|GLTB1_ARATH Ferredoxin-dependent glutamate synthase 1, chloroplastic/mitochondrial OS=Arabidopsis thaliana GN=GLU1 PE=1 SV=3//6.26212e-51
CSA003653	29.168	78.4466	-1.4273	0.0041405	0.023018	--	sp|Q43155|GLTB_SPIOL Ferredoxin-dependent glutamate synthase, chloroplastic OS=Spinacia oleracea GN=FdGOGAT PE=1 SV=3//9.78508e-18
CSA003654	3960.37	12713.3	-1.6826	0.0019933	0.012858	--	sp|Q43155|GLTB_SPIOL Ferredoxin-dependent glutamate synthase, chloroplastic OS=Spinacia oleracea GN=FdGOGAT PE=1 SV=3//0
CSA003657	1073.63	478.879	1.1648	0.0010005	0.0073716	--	sp|Q54X16|GID8_DICDI Glucose-induced degradation protein 8 homolog OS=Dictyostelium discoideum GN=DDB_G0279265 PE=3 SV=2//1.96362e-87
CSA003658	16622.9	76003.9	-2.1929	0.00032389	0.0028849	--	sp|Q7X9A0|RCA1_LARTR Ribulose bisphosphate carboxylase/oxygenase activase 1, chloroplastic OS=Larrea tridentata GN=RCA1 PE=1 SV=1//0
CSA003659	5.09882	41.8562	-3.0372	1.7472e-05	0.0002395	--	-//-
CSA003661	3767.56	7866.23	-1.062	0.0024965	0.015401	--	sp|Q5ZMJ9|SRRM1_CHICK Serine/arginine repetitive matrix protein 1 OS=Gallus gallus GN=SRRM1 PE=2 SV=1//4.85441e-35
CSA003662	16900.3	173820	-3.3625	2.2808e-09	8.1277e-08	--	sp|Q40281|RCA_MALDO Ribulose bisphosphate carboxylase/oxygenase activase, chloroplastic OS=Malus domestica GN=RCA PE=2 SV=1//0
CSA003663	648.539	2319.06	-1.8383	2.1809e-05	0.00028896	--	sp|Q0WWW9|XYLL3_ARATH D-xylose-proton symporter-like 3, chloroplastic OS=Arabidopsis thaliana GN=At5g59250 PE=2 SV=2//0
CSA003671	481.655	237.852	1.0179	0.0062222	0.031753	--	-//-
CSA003673	25.1383	165.639	-2.7201	0.0024171	0.015012	--	sp|Q9M2S6|SDIR1_ARATH E3 ubiquitin-protein ligase SDIR1 OS=Arabidopsis thaliana GN=SDIR1 PE=1 SV=1//5.55515e-108
CSA003681	15.6129	74.1818	-2.2483	3.5708e-05	0.00044137	--	-//-
CSA003692	482.283	78.1347	2.6258	7.5412e-06	0.00011615	--	sp|Q8L7J2|BGL06_ORYSJ Beta-glucosidase 6 OS=Oryza sativa subsp. japonica GN=BGLU6 PE=1 SV=1//6.08493e-113
CSA003693	2044.31	802.785	1.3485	9.0754e-05	0.0009864	--	sp|Q9SH59|RTNLC_ARATH Reticulon-like protein B3 OS=Arabidopsis thaliana GN=RTNLB3 PE=2 SV=1//1.30468e-105
CSA003694	22.1982	2.46608	3.1701	0.00052332	0.0043148	--	-//-
CSA003704	95.5411	278.672	-1.5444	0.00010227	0.0010933	--	sp|Q9FHE4|BRG1_ARATH BOI-related E3 ubiquitin-protein ligase 1 OS=Arabidopsis thaliana GN=BRG1 PE=1 SV=1//8.5526e-65
CSA003710	1147.23	255.566	2.1664	5.6183e-09	1.8706e-07	--	sp|Q6IDL4|P24D3_ARATH Transmembrane emp24 domain-containing protein p24delta3 OS=Arabidopsis thaliana GN=At1g09580 PE=1 SV=1//8.78117e-11
CSA003717	33.2057	478.434	-3.8488	0.0065862	0.033222	--	-//-
CSA003722	185.113	462.521	-1.3211	0.00040562	0.0034909	--	-//-
CSA003723	31.9219	226.625	-2.8277	1.5643e-10	6.9411e-09	--	sp|Q93VA3|CYC6_ARATH Cytochrome c6, chloroplastic OS=Arabidopsis thaliana GN=petJ PE=1 SV=1//9.35085e-30
CSA003726	18814.8	2099.41	3.1638	4.352e-08	1.1984e-06	--	sp|Q39644|LEA5_CITSI Late embryogenesis abundant protein Lea5 OS=Citrus sinensis GN=LEA5 PE=2 SV=1//4.85148e-22
CSA003729	283.062	129.955	1.1231	0.0031415	0.018539	--	sp|O50017|PARP2_MAIZE Poly [ADP-ribose] polymerase 2 OS=Zea mays GN=PARP2 PE=2 SV=1//0
CSA003730	82.7408	235.127	-1.5068	0.00087486	0.0066019	--	sp|B8XCH5|QKY_ARATH Protein QUIRKY OS=Arabidopsis thaliana GN=QKY PE=2 SV=1//0
CSA003731	103.31	229.568	-1.152	0.003076	0.018217	--	sp|Q8C1A9|CD029_MOUSE Uncharacterized protein C4orf29 homolog OS=Mus musculus PE=2 SV=1//7.21933e-14
CSA003732	78.2947	414.187	-2.4033	2.5166e-09	8.9097e-08	--	sp|O22160|TL15A_ARATH Thylakoid lumenal 15 kDa protein 1, chloroplastic OS=Arabidopsis thaliana GN=At2g44920 PE=1 SV=2//2.03251e-35
CSA003733	54.4779	293.716	-2.4307	6.8793e-09	2.2476e-07	--	sp|O22160|TL15A_ARATH Thylakoid lumenal 15 kDa protein 1, chloroplastic OS=Arabidopsis thaliana GN=At2g44920 PE=1 SV=2//1.0706e-43
CSA003742	109.229	1.68551	6.018	0.00026932	0.0024668	--	-//-
CSA003748	1034.39	429.824	1.267	0.00043992	0.0037375	--	sp|Q9LM66|XCP2_ARATH Xylem cysteine proteinase 2 OS=Arabidopsis thaliana GN=XCP2 PE=2 SV=2//6.65995e-66
CSA003750	101.264	220.499	-1.1227	0.0048384	0.026089	--	sp|Q6J9S1|RA211_ARATH Ethylene-responsive transcription factor RAP2-11 OS=Arabidopsis thaliana GN=RAP2-11 PE=2 SV=1//3.07853e-19
CSA003762	141.777	65.329	1.1178	0.009052	0.042568	--	sp|Q9SZL8|FRS5_ARATH Protein FAR1-RELATED SEQUENCE 5 OS=Arabidopsis thaliana GN=FRS5 PE=2 SV=1//2.63987e-24
CSA003764	113.368	336.184	-1.5682	7.1768e-05	0.00080595	--	sp|Q9M390|PTR1_ARATH Protein NRT1/ PTR FAMILY 8.1 OS=Arabidopsis thaliana GN=NPF8.1 PE=1 SV=1//0
CSA003769	774.22	99.5258	2.9596	3.8662e-14	3.2429e-12	--	sp|Q9SYZ7|U496A_ARATH UPF0496 protein At4g34320 OS=Arabidopsis thaliana GN=At4g34320 PE=2 SV=1//2.71457e-162
CSA003770	137.536	57.786	1.251	0.0036111	0.020662	--	sp|Q8RWB8|UPL6_ARATH E3 ubiquitin-protein ligase UPL6 OS=Arabidopsis thaliana GN=UPL6 PE=2 SV=1//3.50399e-32
CSA003784	2487.85	654.074	1.9274	9.0994e-08	2.3129e-06	--	sp|Q84MN0|CML4_ORYSJ Calmodulin-like protein 4 OS=Oryza sativa subsp. japonica GN=CML4 PE=2 SV=1//4.74977e-06
CSA003791	0.930356	14.8504	-3.9966	0.0012504	0.0088623	--	sp|Q8RXK8|SYIM_ARATH Isoleucine--tRNA ligase, chloroplastic/mitochondrial OS=Arabidopsis thaliana GN=OVA2 PE=2 SV=1//1.29773e-12
CSA003796	593.773	196.796	1.5932	2.1986e-05	0.00029095	--	sp|Q9LFT9|RAH1E_ARATH Ras-related protein RABH1e OS=Arabidopsis thaliana GN=RABH1E PE=2 SV=1//2.96193e-111
CSA003800	895.772	2767.44	-1.6273	6.2731e-06	9.8671e-05	--	-//-
CSA003801	171.703	511.989	-1.5762	3.7508e-05	0.0004602	--	sp|Q8RXA8|NDK4_SPIOL Nucleoside diphosphate kinase 4, chloroplastic OS=Spinacia oleracea GN=NDK4 PE=1 SV=1//3.65073e-110
CSA003802	67.5109	204.17	-1.5966	0.00015668	0.0015721	--	-//-
CSA003811	2.00971	183.995	-6.5165	7.9544e-05	0.00087991	--	sp|Q9LNK1|RABA3_ARATH Ras-related protein RABA3 OS=Arabidopsis thaliana GN=RABA3 PE=2 SV=1//5.75706e-109
CSA003817	198.846	1061.51	-2.4164	1.4258e-10	6.4111e-09	--	sp|P53603|FTCD_PIG Formimidoyltransferase-cyclodeaminase OS=Sus scrofa GN=FTCD PE=1 SV=1//9.90937e-13
CSA003818	151.569	2178.79	-3.8455	2.1752e-16	2.4579e-14	--	sp|O48529|STR9_ARATH Rhodanese-like domain-containing protein 9, chloroplastic OS=Arabidopsis thaliana GN=STR9 PE=2 SV=1//1.56384e-57
CSA003819	76.2868	974.238	-3.6748	7.4094e-20	1.387e-17	--	sp|O48529|STR9_ARATH Rhodanese-like domain-containing protein 9, chloroplastic OS=Arabidopsis thaliana GN=STR9 PE=2 SV=1//7.01984e-38
CSA003826	856.679	300.403	1.5119	4.3876e-05	0.00052846	--	-//-
CSA003840	187.749	52.4076	1.841	1.2862e-05	0.00018418	--	sp|Q9LTC0|Y5707_ARATH Probable receptor-like protein kinase At5g47070 OS=Arabidopsis thaliana GN=At5g47070 PE=1 SV=1//9.72968e-73
CSA003841	281.42	75.7699	1.893	2.3193e-06	4.0823e-05	--	sp|Q9LTC0|Y5707_ARATH Probable receptor-like protein kinase At5g47070 OS=Arabidopsis thaliana GN=At5g47070 PE=1 SV=1//3.6695e-49
CSA003843	7634.47	2858.53	1.4173	2.8201e-05	0.00035966	--	sp|O23553|BAM3_ARATH Beta-amylase 3, chloroplastic OS=Arabidopsis thaliana GN=BAM3 PE=1 SV=3//0
CSA003845	279.662	1454.52	-2.3788	2.2934e-10	9.9634e-09	--	sp|Q503V9|ENDUB_DANRE Poly(U)-specific endoribonuclease-B OS=Danio rerio GN=endoub PE=2 SV=1//4.60693e-51
CSA003862	1.25614	51.8272	-5.3666	8.173e-05	0.00090089	--	sp|Q9SRW9|CSLD5_ARATH Cellulose synthase-like protein D5 OS=Arabidopsis thaliana GN=CSLD5 PE=2 SV=1//0
CSA003863	0	22.3191	#NAME?	6.2983e-07	1.2796e-05	--	sp|Q9LXV2|MYB46_ARATH Transcription factor MYB46 OS=Arabidopsis thaliana GN=MYB46 PE=2 SV=1//2.22552e-67
CSA003868	1.60966	40.3214	-4.6467	1.3548e-05	0.00019261	--	sp|Q9FHD7|Y5126_ARATH Probable serine/threonine-protein kinase At5g41260 OS=Arabidopsis thaliana GN=At5g41260 PE=1 SV=1//1.53236e-114
CSA003874	3.47977	28.7828	-3.0481	0.00017349	0.0017066	--	sp|Q3SZI7|COG6_BOVIN Conserved oligomeric Golgi complex subunit 6 OS=Bos taurus GN=COG6 PE=2 SV=1//2.14467e-18
CSA003899	543.141	239.353	1.1822	0.0013244	0.0092913	--	sp|Q9AR73|HQGT_RAUSE Hydroquinone glucosyltransferase OS=Rauvolfia serpentina GN=AS PE=1 SV=1//0
CSA003906	31.3527	5.72918	2.4522	0.00086321	0.0065264	--	sp|F8WKW8|UGT9_GARJA Beta-D-glucosyl crocetin beta-1,6-glucosyltransferase OS=Gardenia jasminoides GN=UGT94E5 PE=1 SV=1//3.41811e-167
CSA003923	19.6577	2.74052	2.8426	0.0024956	0.015398	--	sp|Q67XC9|TPPD_ARATH Probable trehalose-phosphate phosphatase D OS=Arabidopsis thaliana GN=TPPD PE=2 SV=1//2.79428e-62
CSA003953	1673.45	633.655	1.4011	7.5981e-05	0.00084586	--	sp|O23712|PSA1B_ARATH Proteasome subunit alpha type-1-B OS=Arabidopsis thaliana GN=PAF2 PE=1 SV=2//1.44057e-73
CSA003954	1485.19	585.55	1.3428	0.00015195	0.0015318	--	sp|O23712|PSA1B_ARATH Proteasome subunit alpha type-1-B OS=Arabidopsis thaliana GN=PAF2 PE=1 SV=2//1.58109e-70
CSA003955	1979.76	613.745	1.6896	2.6581e-06	4.6062e-05	--	sp|Q9FWS1|AUL1_ARATH Auxilin-like protein 1 OS=Arabidopsis thaliana GN=AUL1 PE=2 SV=2//1.04517e-13
CSA003957	10.0106	91.2818	-3.1888	9.0452e-09	2.8871e-07	--	sp|E1U332|ALL12_OLEEU Isoflavone reductase-like protein OS=Olea europaea PE=1 SV=1//5.25833e-167
CSA003958	162.752	470.253	-1.5308	5.1163e-05	0.00060296	--	-//-
CSA003967	163.724	44.0288	1.8947	0.0005008	0.0041583	--	sp|Q9LMG8|SNP30_ARATH Putative SNAP25 homologous protein SNAP30 OS=Arabidopsis thaliana GN=SNAP30 PE=3 SV=1//5.45248e-87
CSA003999	32.0493	2.02841	3.9819	0.01016	0.046658	--	sp|Q8H1Z0|CER3_ARATH Protein ECERIFERUM 3 OS=Arabidopsis thaliana GN=CER3 PE=1 SV=1//4.14654e-85
CSA004003	456.654	1054.58	-1.2075	0.0007639	0.0059098	--	sp|Q9LN71|RING1_ARATH E3 ubiquitin-protein ligase At1g12760 OS=Arabidopsis thaliana GN=At1g12760 PE=1 SV=1//7.87545e-112
CSA004008	552.104	264.018	1.0643	0.0034455	0.019907	--	sp|O64639|Y2559_ARATH Receptor-like serine/threonine-protein kinase At2g45590 OS=Arabidopsis thaliana GN=At2g45590 PE=2 SV=1//3.74916e-84
CSA004020	4210.98	1784.29	1.2388	0.00033939	0.0030046	--	sp|O48651|ERG1_PANGI Squalene monooxygenase OS=Panax ginseng PE=2 SV=1//0
CSA004025	295.049	32.65	3.1758	5.1954e-09	1.7445e-07	--	-//-
CSA004026	26.7379	68.015	-1.347	0.0060553	0.03107	--	sp|Q9ZQI8|NLTL2_ARATH Non-specific lipid-transfer protein-like protein At2g13820 OS=Arabidopsis thaliana GN=At2g13820 PE=1 SV=1//3.31013e-09
CSA004028	410.032	30.0576	3.7699	1.8303e-16	2.1065e-14	--	-//-
CSA004049	991.579	247.908	1.9999	6.3279e-08	1.6677e-06	--	sp|O81760|P2C63_ARATH Probable protein phosphatase 2C 63 OS=Arabidopsis thaliana GN=At4g33920 PE=2 SV=1//2.60339e-178
CSA004055	187.021	85.5302	1.1287	0.0060161	0.030903	--	-//-
CSA004056	588.905	248.006	1.2477	0.00071123	0.0055675	--	-//-
CSA004063	204.102	69.1792	1.5609	0.0012683	0.0089603	--	sp|P93788|REMO_SOLTU Remorin OS=Solanum tuberosum PE=1 SV=1//1.38826e-41
CSA004068	0	33.0147	#NAME?	0.0023502	0.014696	--	sp|Q9LES3|AI5L2_ARATH ABSCISIC ACID-INSENSITIVE 5-like protein 2 OS=Arabidopsis thaliana GN=DPBF3 PE=1 SV=1//1.38619e-82
CSA004078	137.593	60.6174	1.1826	0.00613	0.031374	--	sp|A5PK19|MET13_BOVIN Methyltransferase-like protein 13 OS=Bos taurus GN=METTL13 PE=2 SV=1//1.5355e-27
CSA004092	2.58655	16.6926	-2.6901	0.0060364	0.030996	--	sp|Q39214|RPM1_ARATH Disease resistance protein RPM1 OS=Arabidopsis thaliana GN=RPM1 PE=1 SV=1//8.20077e-152
CSA004093	0.316384	50.7813	-7.3265	2.0679e-06	3.695e-05	--	sp|Q84RF2|OPF17_ARATH Transcription repressor OFP17 OS=Arabidopsis thaliana GN=OFP17 PE=2 SV=1//2.18428e-30
CSA004108	3719.82	306.245	3.6025	2.3207e-08	6.7888e-07	--	sp|Q8LG88|TDT_ARATH Tonoplast dicarboxylate transporter OS=Arabidopsis thaliana GN=TDT PE=2 SV=2//2.80275e-158
CSA004109	491.237	216.097	1.1847	0.0047169	0.025608	--	-//-
CSA004113	143.864	879.979	-2.6128	0.00091624	0.0068512	--	sp|Q8W486|Y1491_ARATH Uncharacterized protein At1g04910 OS=Arabidopsis thaliana GN=At1g04910 PE=2 SV=1//8.36006e-77
CSA004128	1121.45	267.217	2.0693	0.00035808	0.0031435	--	sp|Q9AT54|SCGT_TOBAC Scopoletin glucosyltransferase OS=Nicotiana tabacum GN=TOGT1 PE=1 SV=1//0
CSA004129	20953.8	1586.81	3.723	3.5851e-12	2.2024e-10	--	sp|Q9ZQ96|U73C3_ARATH UDP-glycosyltransferase 73C3 OS=Arabidopsis thaliana GN=UGT73C3 PE=2 SV=1//4.2832e-43
CSA004139	228.162	33.7366	2.7577	3.0697e-10	1.297e-08	--	sp|Q7QBJ0|U483_ANOGA UPF0483 protein AGAP003155 OS=Anopheles gambiae GN=AGAP003155 PE=3 SV=3//1.87685e-22
CSA004145	732.543	326.237	1.167	0.0010896	0.0078983	--	sp|P48626|FAD3E_TOBAC Omega-3 fatty acid desaturase, endoplasmic reticulum OS=Nicotiana tabacum GN=FAD3 PE=2 SV=1//0
CSA004148	328.689	817.344	-1.3142	0.00032144	0.0028678	--	sp|Q5TKD8|TRL2_ORYSJ Thioredoxin-like 2, chloroplastic OS=Oryza sativa subsp. japonica GN=Os05g0200100 PE=2 SV=1//1.92346e-82
CSA004149	139.707	303.661	-1.1201	0.0039853	0.022305	--	-//-
CSA004151	896.575	111.507	3.0073	6.4879e-13	4.4564e-11	--	sp|Q9ZNT7|PHB2_ARATH Prohibitin-2, mitochondrial OS=Arabidopsis thaliana GN=PHB2 PE=1 SV=1//9.15212e-139
CSA004152	1332.53	330.003	2.0136	1.2518e-06	2.3749e-05	--	sp|I7C6E8|C7A52_PANGI Beta-amyrin 28-oxidase OS=Panax ginseng PE=2 SV=1//2.65337e-89
CSA004159	375.778	127.225	1.5625	0.00050582	0.0041888	--	sp|P93033|FUM1_ARATH Fumarate hydratase 1, mitochondrial OS=Arabidopsis thaliana GN=FUM1 PE=2 SV=2//5.32158e-124
CSA004162	862.856	313.105	1.4625	0.00011051	0.0011654	--	sp|Q9FI53|FUM2_ARATH Fumarate hydratase 2, chloroplastic OS=Arabidopsis thaliana GN=FUM2 PE=2 SV=1//0
CSA004167	37.5313	100.626	-1.4228	0.0017597	0.011627	--	sp|O65359|SYP41_ARATH Syntaxin-41 OS=Arabidopsis thaliana GN=SYP41 PE=1 SV=1//2.9207e-161
CSA004194	785.896	2784.1	-1.8248	0.0016303	0.010945	--	sp|C7AU21|D27_ORYSJ Beta-carotene isomerase D27, chloroplastic OS=Oryza sativa subsp. japonica GN=D27 PE=1 SV=1//2.86977e-43
CSA004196	634.392	244.855	1.3734	0.00020091	0.0019328	--	-//-
CSA004206	1961.25	693.984	1.4988	2.1295e-05	0.00028283	--	sp|Q9LHG8|ELC_ARATH Protein ELC OS=Arabidopsis thaliana GN=ELC PE=1 SV=1//1.48229e-158
CSA004208	10.1976	53.1355	-2.3814	0.00010647	0.0011304	--	sp|P50846|ALKH_BACSU KHG/KDPG aldolase OS=Bacillus subtilis (strain 168) GN=kdgA PE=2 SV=1//4.64749e-08
CSA004211	61.2193	152.471	-1.3165	0.00205	0.013161	--	-//-
CSA004218	195.588	60.2692	1.6983	0.00057349	0.0046659	--	sp|C5E268|CMC4_LACTC Cx9C motif-containing protein 4, mitochondrial OS=Lachancea thermotolerans (strain ATCC 56472 / CBS 6340 / NRRL Y-8284) GN=CMC4 PE=3 SV=1//2.55167e-06
CSA004228	22.9156	59.5532	-1.3779	0.010056	0.046266	--	sp|Q27IK7|POK1_ARATH Phragmoplast orienting kinesin-1 OS=Arabidopsis thaliana GN=POK1 PE=1 SV=1//1.07042e-23
CSA004251	12.0014	99.1934	-3.047	0.00041059	0.0035267	--	sp|Q9XGY7|FAR_SIMCH Alcohol-forming fatty acyl-CoA reductase OS=Simmondsia chinensis PE=1 SV=1//0
CSA004252	12.7278	0.617342	4.3658	0.0019012	0.012388	--	sp|Q9ZUX1|C94C1_ARATH Cytochrome P450 94C1 OS=Arabidopsis thaliana GN=CYP94C1 PE=2 SV=1//0
CSA004261	3852.71	27.5441	7.128	2.4114e-17	3.1585e-15	--	sp|P10978|POLX_TOBAC Retrovirus-related Pol polyprotein from transposon TNT 1-94 OS=Nicotiana tabacum PE=2 SV=1//9.69357e-11
CSA004263	304.874	115.532	1.3999	0.000317	0.0028327	--	-//-
CSA004264	324.393	113.077	1.5204	8.2959e-05	0.00091259	--	-//-
CSA004268	990.857	284.705	1.7992	2.0421e-05	0.0002728	--	sp|Q8W486|Y1491_ARATH Uncharacterized protein At1g04910 OS=Arabidopsis thaliana GN=At1g04910 PE=2 SV=1//4.80693e-76
CSA004269	638.897	301.526	1.0833	0.0024436	0.015148	--	sp|P34893|CH10_ARATH 10 kDa chaperonin OS=Arabidopsis thaliana GN=CPN10 PE=3 SV=1//9.25381e-48
CSA004276	132.391	1652.44	-3.6417	5.6505e-20	1.081e-17	--	-//-
CSA004286	269.561	555.851	-1.0441	0.0039573	0.022177	--	sp|Q9SLN8|DBR_TOBAC 2-alkenal reductase (NADP(+)-dependent) OS=Nicotiana tabacum GN=DBR PE=1 SV=1//2.42877e-122
CSA004294	1376.53	135.266	3.3472	4.3729e-18	6.3366e-16	--	sp|Q9SZ92|CK3_ARATH Probable choline kinase 3 OS=Arabidopsis thaliana GN=At4g09760 PE=2 SV=1//7.66298e-164
CSA004297	20.1993	1.32946	3.9254	0.0034963	0.020148	--	sp|Q9LY77|ACA12_ARATH Calcium-transporting ATPase 12, plasma membrane-type OS=Arabidopsis thaliana GN=ACA12 PE=2 SV=1//0
CSA004302	0	8.44996	#NAME?	0.0027712	0.016746	--	sp|Q9LHP4|RCH2_ARATH Receptor-like protein kinase 2 OS=Arabidopsis thaliana GN=RCH2 PE=1 SV=1//0
CSA004304	28.8141	120.335	-2.0622	1.1481e-05	0.00016687	--	sp|Q9SYK0|HEXO2_ARATH Beta-hexosaminidase 2 OS=Arabidopsis thaliana GN=HEXO2 PE=1 SV=1//0
CSA004305	9.29548	286.18	-4.9443	3.75e-09	1.2818e-07	--	sp|Q9ZPW9|NLTP8_ARATH Non-specific lipid-transfer protein 8 OS=Arabidopsis thaliana GN=LTP8 PE=3 SV=1//3.5645e-07
CSA004307	1128.17	72.8002	3.9539	2.2622e-13	1.6556e-11	--	sp|Q9D967|MGDP1_MOUSE Magnesium-dependent phosphatase 1 OS=Mus musculus GN=Mdp1 PE=1 SV=1//1.94547e-29
CSA004317	48.1689	328.887	-2.7714	3.268e-09	1.1331e-07	--	sp|Q9LU85|PAP4_ARATH Probable plastid-lipid-associated protein 4, chloroplastic OS=Arabidopsis thaliana GN=PAP4 PE=2 SV=1//6.90594e-71
CSA004324	128.425	641.723	-2.321	0.00084268	0.0063944	--	sp|Q8H103|G6PIP_ARATH Glucose-6-phosphate isomerase 1, chloroplastic OS=Arabidopsis thaliana GN=PGI1 PE=1 SV=1//1.0841e-22
CSA004347	162.038	590.851	-1.8665	6.3924e-07	1.2956e-05	--	sp|Q9SFH9|HEM21_ARATH Delta-aminolevulinic acid dehydratase 1, chloroplastic OS=Arabidopsis thaliana GN=HEMB1 PE=2 SV=1//4.64765e-180
CSA004349	707.44	319.123	1.1485	0.0022647	0.014281	--	sp|Q8VYX0|ILL6_ARATH IAA-amino acid hydrolase ILR1-like 6 OS=Arabidopsis thaliana GN=ILL6 PE=2 SV=2//0
CSA004350	76.1786	28.7505	1.4058	0.005072	0.027075	--	sp|Q8LFS6|BRN1L_ARATH RNA-binding protein BRN1 OS=Arabidopsis thaliana GN=BRN1 PE=2 SV=1//1.29176e-64
CSA004352	57.2995	17.6482	1.699	0.0023665	0.014773	--	sp|Q8LFS6|BRN1L_ARATH RNA-binding protein BRN1 OS=Arabidopsis thaliana GN=BRN1 PE=2 SV=1//7.60633e-37
CSA004354	39.7079	98.3464	-1.3084	0.0047228	0.025624	--	-//-
CSA004360	10.7087	116.194	-3.4397	1.4057e-09	5.2405e-08	--	sp|Q9LVM0|Y5830_ARATH Probable inactive receptor kinase At5g58300 OS=Arabidopsis thaliana GN=At5g58300 PE=2 SV=1//4.39433e-73
CSA004365	848.242	25.4407	5.0593	2.6971e-11	1.3807e-09	--	sp|Q9LDE1|MY108_ARATH Transcription factor MYB108 OS=Arabidopsis thaliana GN=MYB108 PE=1 SV=1//2.90986e-62
CSA004368	345.629	19.747	4.1295	0.00019998	0.0019246	--	-//-
CSA004375	129.324	390.735	-1.5952	0.00096844	0.0071813	--	sp|Q9SX20|PTR18_ARATH Protein NRT1/ PTR FAMILY 3.1 OS=Arabidopsis thaliana GN=NPF3.1 PE=2 SV=1//2.22865e-141
CSA004378	117.536	600.218	-2.3524	0.0024102	0.014989	--	sp|Q96PB1|CASD1_HUMAN CAS1 domain-containing protein 1 OS=Homo sapiens GN=CASD1 PE=2 SV=1//1.35985e-55
CSA004393	202.827	735.433	-1.8583	0.0001006	0.0010776	--	-//-
CSA004399	140.026	526.082	-1.9096	5.8101e-07	1.1971e-05	--	sp|Q84ZT9|WVD2_ARATH Protein WAVE-DAMPENED 2 OS=Arabidopsis thaliana GN=WVD2 PE=2 SV=1//2.83836e-06
CSA004401	441.646	1395.26	-1.6596	0.0010307	0.0075521	--	sp|Q6DHN0|TMM53_DANRE Transmembrane protein 53 OS=Danio rerio GN=tmem53 PE=2 SV=1//4.84227e-20
CSA004411	383.025	803.668	-1.0692	0.003793	0.021444	--	sp|P35159|RLUB_BACSU Ribosomal large subunit pseudouridine synthase B OS=Bacillus subtilis (strain 168) GN=rluB PE=1 SV=2//7.97149e-30
CSA004417	351.621	1441.69	-2.0357	3.4403e-08	9.6748e-07	--	sp|Q9FNJ9|CA1P_ARATH Probable 2-carboxy-D-arabinitol-1-phosphatase OS=Arabidopsis thaliana GN=At5g22620 PE=1 SV=1//6.82474e-51
CSA004422	42.4825	122.009	-1.522	0.0060844	0.031185	--	-//-
CSA004426	902.06	192.195	2.2307	0.0078591	0.038142	--	sp|Q9LK36|SAHH2_ARATH Adenosylhomocysteinase 2 OS=Arabidopsis thaliana GN=SAHH2 PE=1 SV=1//0
CSA004428	33.9143	198.431	-2.5487	0.00035373	0.0031119	--	sp|P93004|PIP27_ARATH Aquaporin PIP2-7 OS=Arabidopsis thaliana GN=PIP2-7 PE=1 SV=2//6.96129e-141
CSA004431	5.4241	534.261	-6.622	5.1789e-28	2.5099e-25	--	sp|Q43872|PER64_ARATH Peroxidase 64 OS=Arabidopsis thaliana GN=PER64 PE=1 SV=1//7.29319e-157
CSA004440	15729.8	1077.65	3.8675	2.2927e-24	7.7518e-22	--	sp|Q9SLG3|ZIP3_ARATH Zinc transporter 3 OS=Arabidopsis thaliana GN=ZIP3 PE=2 SV=1//5.10628e-29
CSA004455	2939.17	1074.21	1.4521	3.9796e-05	0.00048472	--	sp|Q15751|HERC1_HUMAN Probable E3 ubiquitin-protein ligase HERC1 OS=Homo sapiens GN=HERC1 PE=1 SV=2//3.58403e-18
CSA004457	2172.72	164.973	3.7192	6.4262e-09	2.1122e-07	--	sp|Q39013|NAC2_ARATH NAC domain-containing protein 2 OS=Arabidopsis thaliana GN=NAC002 PE=2 SV=2//2.34507e-129
CSA004458	1.91664	14.0778	-2.8768	0.0093521	0.043645	--	sp|Q9M2Y9|RAX3_ARATH Transcription factor RAX3 OS=Arabidopsis thaliana GN=RAX3 PE=2 SV=1//4.89234e-78
CSA004464	2.95886	82.3672	-4.799	0.0071208	0.035298	--	sp|Q9VR91|HERC2_DROME Probable E3 ubiquitin-protein ligase HERC2 OS=Drosophila melanogaster GN=HERC2 PE=1 SV=3//7.40809e-08
CSA004471	879.136	272.589	1.6894	4.4815e-06	7.3403e-05	--	sp|H2DH21|C7A29_PANGI Cytochrome P450 CYP72A219 OS=Panax ginseng PE=2 SV=1//2.99967e-99
CSA004480	1771.69	632.618	1.4857	3.2419e-05	0.00040632	--	sp|Q9M390|PTR1_ARATH Protein NRT1/ PTR FAMILY 8.1 OS=Arabidopsis thaliana GN=NPF8.1 PE=1 SV=1//0
CSA004483	171.548	50.5391	1.7631	3.7651e-05	0.00046169	--	sp|Q7X8C5|WAKLB_ARATH Wall-associated receptor kinase-like 2 OS=Arabidopsis thaliana GN=WAKL2 PE=2 SV=1//2.01359e-139
CSA004484	913.783	450.222	1.0212	0.0056183	0.029337	--	-//-
CSA004488	4427.54	12448	-1.4913	5.955e-05	0.00068842	--	sp|P24805|TSJT1_TOBAC Stem-specific protein TSJT1 OS=Nicotiana tabacum GN=TSJT1 PE=2 SV=1//2.67586e-25
CSA004489	2144.07	572.339	1.9054	1.0458e-07	2.6095e-06	--	sp|Q8L4B2|NFYC9_ARATH Nuclear transcription factor Y subunit C-9 OS=Arabidopsis thaliana GN=NFYC9 PE=2 SV=1//7.51935e-75
CSA004504	187.99	2632.35	-3.8076	2.7736e-22	7.1163e-20	--	sp|Q9LV33|BGL44_ARATH Beta-glucosidase 44 OS=Arabidopsis thaliana GN=BGLU44 PE=2 SV=1//0
CSA004505	112.983	35.6966	1.6622	0.00031121	0.0027867	--	sp|P29357|HSP7E_SPIOL Chloroplast envelope membrane 70 kDa heat shock-related protein OS=Spinacia oleracea GN=SCE70 PE=1 SV=3//2.26195e-22
CSA004518	3.85208	62.0785	-4.0104	1.1645e-05	0.0001688	--	-//-
CSA004520	151.496	26.8952	2.4939	0.005172	0.027467	--	sp|Q9C7Z9|SCP18_ARATH Serine carboxypeptidase-like 18 OS=Arabidopsis thaliana GN=SCPL18 PE=2 SV=2//3.05808e-21
CSA004521	112.517	14.5569	2.9504	1.0102e-08	3.1905e-07	--	sp|O04567|Y1719_ARATH Probable inactive receptor kinase At1g27190 OS=Arabidopsis thaliana GN=At1g27190 PE=1 SV=1//1.04877e-175
CSA004522	161.963	36.6246	2.1448	7.6964e-05	0.00085484	--	sp|O04567|Y1719_ARATH Probable inactive receptor kinase At1g27190 OS=Arabidopsis thaliana GN=At1g27190 PE=1 SV=1//0
CSA004525	110.76	331.201	-1.5803	0.0030396	0.018046	--	sp|C0LGT6|EFR_ARATH LRR receptor-like serine/threonine-protein kinase EFR OS=Arabidopsis thaliana GN=EFR PE=1 SV=1//1.91251e-19
CSA004531	892.224	4531.05	-2.3444	1.5118e-10	6.7424e-09	--	sp|Q96DG6|CMBL_HUMAN Carboxymethylenebutenolidase homolog OS=Homo sapiens GN=CMBL PE=1 SV=1//2.69743e-26
CSA004532	8644.16	70832.5	-3.0346	2.4501e-16	2.7472e-14	--	sp|Q9XF89|CB5_ARATH Chlorophyll a-b binding protein CP26, chloroplastic OS=Arabidopsis thaliana GN=LHCB5 PE=1 SV=1//1.44397e-109
CSA004535	1690.24	3857.44	-1.1904	0.0095773	0.044499	--	-//-
CSA004543	1347.99	656.806	1.0373	0.0032165	0.018874	--	sp|Q94AX4|DLD_ARATH D-lactate dehydrogenase [cytochrome], mitochondrial OS=Arabidopsis thaliana GN=DLD PE=1 SV=1//0
CSA004558	801.863	366.218	1.1307	0.0018317	0.012019	--	-//-
CSA004559	93.9586	253.001	-1.429	0.00033257	0.0029513	--	sp|Q28EW0|TM87A_XENTR Transmembrane protein 87A OS=Xenopus tropicalis GN=tmem87a PE=2 SV=1//6.07137e-15
CSA004569	2110.5	51.9791	5.3435	4.2872e-17	5.4619e-15	--	sp|Q9LFR1|PTR50_ARATH Protein NRT1/ PTR FAMILY 5.8 OS=Arabidopsis thaliana GN=NPF5.8 PE=2 SV=1//6.26984e-88
CSA004588	26.2379	310.832	-3.5664	0.0019906	0.012845	--	sp|Q93VJ4|BEE2_ARATH Transcription factor BEE 2 OS=Arabidopsis thaliana GN=BEE2 PE=2 SV=1//7.18505e-46
CSA004593	120.298	362.478	-1.5913	0.00065931	0.0052333	--	sp|Q6Z2G9|TLP5_ORYSJ Tubby-like F-box protein 5 OS=Oryza sativa subsp. japonica GN=TULP5 PE=2 SV=1//0
CSA004597	17.1003	71.0207	-2.0542	0.00010718	0.0011366	--	sp|P24792|ASO_CUCMA L-ascorbate oxidase OS=Cucurbita maxima GN=AAO PE=1 SV=2//0
CSA004598	707.563	322.879	1.1319	0.0015342	0.010425	--	sp|Q8K2L8|TPC12_MOUSE Trafficking protein particle complex subunit 12 OS=Mus musculus GN=Trappc12 PE=1 SV=2//4.25173e-34
CSA004620	822.215	348.236	1.2395	0.00056674	0.0046178	--	-//-
CSA004630	127.198	49.7533	1.3542	0.0017872	0.011775	--	-//-
CSA004634	128.375	51.1006	1.329	0.0030028	0.01788	--	sp|Q9FI14|TAO1_ARATH Disease resistance protein TAO1 OS=Arabidopsis thaliana GN=TAO1 PE=3 SV=1//4.59788e-15
CSA004659	42.6866	189.703	-2.1519	6.2761e-07	1.2762e-05	--	sp|B9SR15|CSPL4_RICCO CASP-like protein 4C1 OS=Ricinus communis GN=RCOM_0464280 PE=2 SV=1//1.23e-64
CSA004675	534.65	6.46102	6.3707	1.5856e-11	8.4441e-10	--	sp|Q8GY42|NAC25_ARATH NAC transcription factor 25 OS=Arabidopsis thaliana GN=NAC025 PE=2 SV=1//1.52729e-101
CSA004677	8.03843	64.1753	-2.997	7.623e-05	0.00084813	--	sp|P0C8Q4|Y4990_ARATH Uncharacterized protein At4g19900 OS=Arabidopsis thaliana GN=At4g19900 PE=2 SV=1//1.65464e-30
CSA004683	1663.26	460.32	1.8533	0.00010348	0.0011038	--	sp|Q9SMZ4|AASS_ARATH Alpha-aminoadipic semialdehyde synthase OS=Arabidopsis thaliana GN=LKR/SDH PE=1 SV=1//0
CSA004684	4541.66	1646.34	1.464	2.9596e-05	0.00037526	--	sp|Q2V9B0|MY1R1_SOLTU Transcription factor MYB1R1 OS=Solanum tuberosum PE=2 SV=1//1.66468e-50
CSA004685	1989.79	907.328	1.1329	0.0014971	0.01023	--	sp|O04567|Y1719_ARATH Probable inactive receptor kinase At1g27190 OS=Arabidopsis thaliana GN=At1g27190 PE=1 SV=1//0
CSA004693	2.52167	189.907	-6.2348	2.7027e-23	8.0743e-21	--	sp|Q9SWW6|CESA7_ARATH Cellulose synthase A catalytic subunit 7 [UDP-forming] OS=Arabidopsis thaliana GN=CESA7 PE=1 SV=1//0
CSA004702	2847.76	1391.26	1.0334	0.0032395	0.018968	--	-//-
CSA004724	345.256	121.505	1.5066	8.7946e-05	0.00095971	--	sp|Q60EY1|GH36_ORYSJ Probable indole-3-acetic acid-amido synthetase GH3.6 OS=Oryza sativa subsp. japonica GN=GH3.6 PE=2 SV=2//3.9475e-127
CSA004728	955.415	246.849	1.9525	1.1142e-07	2.7566e-06	--	sp|Q8RXC8|RBK2_ARATH Receptor-like cytosolic serine/threonine-protein kinase RBK2 OS=Arabidopsis thaliana GN=RBK2 PE=1 SV=1//2.78445e-132
CSA004731	2509.78	26.9044	6.5436	2.1289e-07	4.9e-06	--	sp|P93051|ERDL7_ARATH Sugar transporter ERD6-like 7 OS=Arabidopsis thaliana GN=At2g48020 PE=2 SV=2//0
CSA004732	908.22	149.103	2.6067	2.9207e-05	0.00037108	--	sp|P93050|RKF3_ARATH Probable LRR receptor-like serine/threonine-protein kinase RKF3 OS=Arabidopsis thaliana GN=RKF3 PE=2 SV=1//0
CSA004733	108.578	497.532	-2.1961	1.7118e-08	5.1577e-07	--	sp|P55195|PUR6_VIGAC Phosphoribosylaminoimidazole carboxylase, chloroplastic (Fragment) OS=Vigna aconitifolia GN=PURKE PE=2 SV=1//1.48644e-58
CSA004736	113.032	6.89674	4.0347	0.0044433	0.024356	--	-//-
CSA004737	87.9775	221.155	-1.3298	0.0010557	0.0076987	--	sp|Q84MA5|CAAT1_ARATH Cationic amino acid transporter 1 OS=Arabidopsis thaliana GN=CAT1 PE=1 SV=1//4.15675e-53
CSA004743	4032.89	381.302	3.4028	1.0172e-08	3.2081e-07	--	sp|Q9LY87|RGLG2_ARATH E3 ubiquitin-protein ligase RGLG2 OS=Arabidopsis thaliana GN=RGLG2 PE=1 SV=1//1.93309e-177
CSA004762	270.491	1046.09	-1.9514	1.8163e-07	4.2501e-06	--	sp|Q9SLG8|SSL2_ARATH Protein STRICTOSIDINE SYNTHASE-LIKE 2 OS=Arabidopsis thaliana GN=SSL2 PE=2 SV=1//1.01949e-120
CSA004763	87268.1	383273	-2.1348	3.1948e-09	1.1103e-07	--	sp|Q96542|RBS_BETPN Ribulose bisphosphate carboxylase small chain, chloroplastic OS=Betula pendula GN=RBCS1 PE=2 SV=1//6.69942e-91
CSA004770	4.08434	21.4517	-2.3929	0.0058799	0.030362	--	-//-
CSA004774	297.689	1406.58	-2.2403	1.3256e-09	4.9714e-08	--	sp|P22180|PMA1_SOLLC Plasma membrane ATPase 1 OS=Solanum lycopersicum GN=LHA1 PE=2 SV=1//0
CSA004785	280.98	645.047	-1.1989	0.0012039	0.0085848	--	sp|Q8W4A5|APO2_ARATH APO protein 2, chloroplastic OS=Arabidopsis thaliana GN=APO2 PE=2 SV=1//3.82458e-169
CSA004787	151.434	38.2621	1.9847	0.0014766	0.010119	--	sp|Q9ZPS3|DCE4_ARATH Glutamate decarboxylase 4 OS=Arabidopsis thaliana GN=GAD4 PE=1 SV=1//1.71355e-37
CSA004788	113.635	21.788	2.3828	1.6823e-06	3.083e-05	--	sp|Q9ZPS3|DCE4_ARATH Glutamate decarboxylase 4 OS=Arabidopsis thaliana GN=GAD4 PE=1 SV=1//7.61483e-39
CSA004789	87.8735	15.4908	2.504	1.5191e-06	2.821e-05	--	sp|Q9ZPS3|DCE4_ARATH Glutamate decarboxylase 4 OS=Arabidopsis thaliana GN=GAD4 PE=1 SV=1//4.68671e-58
CSA004790	476.99	92.6692	2.3638	1.0698e-09	4.0966e-08	--	sp|Q9ZPS4|DCE3_ARATH Glutamate decarboxylase 3 OS=Arabidopsis thaliana GN=GAD3 PE=2 SV=1//1.09416e-66
CSA004796	706.923	13069.4	-4.2085	0.0020929	0.013385	--	-//-
CSA004810	40.6684	102.783	-1.3376	0.0039183	0.022007	--	sp|O22870|FK163_ARATH Peptidyl-prolyl cis-trans isomerase FKBP16-3, chloroplastic OS=Arabidopsis thaliana GN=FKBP16-3 PE=1 SV=2//8.55356e-49
CSA004812	34.9842	93.9722	-1.4255	0.0029768	0.017754	--	sp|O22870|FK163_ARATH Peptidyl-prolyl cis-trans isomerase FKBP16-3, chloroplastic OS=Arabidopsis thaliana GN=FKBP16-3 PE=1 SV=2//2.43796e-11
CSA004827	3.95409	120.743	-4.9325	0.0014584	0.010032	--	sp|Q9LYW0|Y5325_ARATH BTB/POZ domain-containing protein At5g03250 OS=Arabidopsis thaliana GN=At5g03250 PE=2 SV=1//0
CSA004828	716.98	356.912	1.0064	0.0057197	0.029753	--	sp|Q9FN67|Y5133_ARATH BTB/POZ domain-containing protein At5g41330 OS=Arabidopsis thaliana GN=At5g41330 PE=2 SV=1//0
CSA004830	2611.06	1180.68	1.145	0.0012164	0.0086537	--	sp|Q9ZUA0|OST1B_ARATH Dolichyl-diphosphooligosaccharide--protein glycosyltransferase subunit 1B OS=Arabidopsis thaliana GN=OST1B PE=2 SV=1//0
CSA004842	467.511	6511.86	-3.8	6.8383e-07	1.3796e-05	--	sp|O82627|SSG1_ANTMA Granule-bound starch synthase 1, chloroplastic/amyloplastic OS=Antirrhinum majus GN=WAXY PE=2 SV=1//0
CSA004849	8.80191	96.8102	-3.4593	5.7044e-10	2.2953e-08	--	-//-
CSA004850	3240.89	373.123	3.1187	1.6826e-16	1.9519e-14	--	sp|Q9SAH9|CCR2_ARATH Cinnamoyl-CoA reductase 2 OS=Arabidopsis thaliana GN=CCR2 PE=1 SV=1//9.5664e-21
CSA004851	2111.76	286.295	2.8829	2.3292e-14	2.0278e-12	--	sp|Q500U8|TKPR1_ARATH Tetraketide alpha-pyrone reductase 1 OS=Arabidopsis thaliana GN=TKPR1 PE=1 SV=1//1.75053e-10
CSA004852	5118.06	20.2222	7.9835	5.7286e-22	1.4278e-19	--	-//-
CSA004853	702.352	2.02841	8.4357	1.4163e-23	4.3811e-21	--	-//-
CSA004858	280.211	81.297	1.7852	0.0043003	0.023742	--	sp|Q9LY77|ACA12_ARATH Calcium-transporting ATPase 12, plasma membrane-type OS=Arabidopsis thaliana GN=ACA12 PE=2 SV=1//0
CSA004859	465.808	41.8515	3.4764	1.0647e-05	0.00015668	--	-//-
CSA004860	2105.95	865.445	1.283	0.00030753	0.0027594	--	sp|Q8H1T3|FRI2_TOBAC Ferritin-2, chloroplastic OS=Nicotiana tabacum GN=FER2 PE=2 SV=1//7.79491e-117
CSA004861	48.4002	532.428	-3.4595	0.0032888	0.0192	--	sp|O48788|Y2267_ARATH Probable inactive receptor kinase At2g26730 OS=Arabidopsis thaliana GN=At2g26730 PE=1 SV=1//9.22262e-84
CSA004863	7079.49	1388.94	2.3497	8.2401e-11	3.8317e-09	--	sp|F4JZC2|ENAS1_ARATH Cytosolic endo-beta-N-acetylglucosaminidase 1 OS=Arabidopsis thaliana GN=ENGASE1 PE=1 SV=1//0
CSA004864	37.7175	106.164	-1.493	0.0013545	0.009466	--	sp|Q9FLE8|Y5986_ARATH Uncharacterized protein At5g39865 OS=Arabidopsis thaliana GN=At5g39865 PE=2 SV=1//8.72003e-20
CSA004879	521.394	11.5189	5.5003	6.1923e-25	2.2507e-22	--	sp|Q9SHF3|AGO2_ARATH Protein argonaute 2 OS=Arabidopsis thaliana GN=AGO2 PE=1 SV=1//3.87632e-127
CSA004880	1021.41	21.0094	5.6034	1.5302e-22	4.0696e-20	--	sp|Q9SHF3|AGO2_ARATH Protein argonaute 2 OS=Arabidopsis thaliana GN=AGO2 PE=1 SV=1//3.18298e-168
CSA004891	5.434	97.0018	-4.1579	1.9638e-12	1.269e-10	--	-//-
CSA004893	0.632768	10.8818	-4.1041	0.005297	0.027951	--	sp|O23482|OPT3_ARATH Oligopeptide transporter 3 OS=Arabidopsis thaliana GN=OPT3 PE=2 SV=3//8.10611e-78
CSA004895	21420.1	4938.04	2.117	2.2967e-09	8.1776e-08	--	sp|Q96303|PHT14_ARATH Inorganic phosphate transporter 1-4 OS=Arabidopsis thaliana GN=PHT1-4 PE=1 SV=1//0
CSA004907	112.758	39.3552	1.5186	0.00092428	0.0068984	--	sp|C0LGN2|Y3148_ARATH Probable leucine-rich repeat receptor-like serine/threonine-protein kinase At3g14840 OS=Arabidopsis thaliana GN=LRR-RLK PE=2 SV=1//1.0473e-90
CSA004909	12203.9	70528	-2.5308	3.9951e-08	1.1078e-06	--	sp|Q40519|PSBR_TOBAC Photosystem II 10 kDa polypeptide, chloroplastic OS=Nicotiana tabacum GN=PSBR PE=2 SV=1//2.59796e-59
CSA004920	502.194	2857.52	-2.5084	0.0026005	0.015928	--	sp|O48946|CESA1_ARATH Cellulose synthase A catalytic subunit 1 [UDP-forming] OS=Arabidopsis thaliana GN=CESA1 PE=1 SV=1//0
CSA004932	843.315	285.362	1.5633	2.0294e-05	0.00027135	--	sp|O64556|Y2923_ARATH Putative leucine-rich repeat receptor-like serine/threonine-protein kinase At2g19230 OS=Arabidopsis thaliana GN=At2g19230 PE=3 SV=3//2.63893e-132
CSA004933	405.167	135.267	1.5827	4.2168e-05	0.0005109	--	sp|Q9FZB1|Y5188_ARATH Probable LRR receptor-like serine/threonine-protein kinase At1g51880 OS=Arabidopsis thaliana GN=At1g51880 PE=2 SV=1//3.35058e-75
CSA004935	4686.31	2124.9	1.1411	0.00095609	0.007103	--	sp|Q9C5U3|PRS8A_ARATH 26S protease regulatory subunit 8 homolog A OS=Arabidopsis thaliana GN=RPT6A PE=1 SV=1//0
CSA004937	2.59595	37.9159	-3.8685	0.00034285	0.0030283	--	sp|Q9SAH3|Y1887_ARATH Putative receptor-like protein kinase At1g80870 OS=Arabidopsis thaliana GN=At1g80870 PE=3 SV=1//0
CSA004967	293.233	25.9968	3.4956	3.9692e-06	6.5839e-05	--	sp|Q9C8M5|WAG1_ARATH Serine/threonine-protein kinase WAG1 OS=Arabidopsis thaliana GN=WAG1 PE=2 SV=1//2.00751e-177
CSA004971	115.321	258.867	-1.1666	0.0027602	0.0167	--	sp|Q9FK13|PDV1_ARATH Plastid division protein PDV1 OS=Arabidopsis thaliana GN=PDV1 PE=1 SV=1//1.22566e-74
CSA004972	68.9286	23.6584	1.5427	0.010667	0.048451	--	sp|Q9SUE3|CRF4_ARATH Ethylene-responsive transcription factor CRF4 OS=Arabidopsis thaliana GN=CRF4 PE=1 SV=2//2.59194e-34
CSA004974	119.702	597.24	-2.3189	3.3199e-05	0.00041468	--	sp|Q9ZSY8|IAA27_ARATH Auxin-responsive protein IAA27 OS=Arabidopsis thaliana GN=IAA27 PE=1 SV=1//3.34387e-68
CSA004985	3302.91	1295.72	1.35	0.00013582	0.0013891	--	sp|P48620|FAD3C_SESIN Omega-3 fatty acid desaturase, chloroplastic OS=Sesamum indicum GN=FAD7 PE=2 SV=1//0
CSA004989	3469.01	1443.39	1.2651	0.00071429	0.0055843	--	sp|Q65CJ7|HPPR_PLESU Hydroxyphenylpyruvate reductase OS=Plectranthus scutellarioides GN=HPPR PE=1 SV=2//1.23944e-161
CSA004990	2486.49	23810.1	-3.2594	3.2015e-10	1.3476e-08	--	sp|P22179|PSAH_SPIOL Photosystem I reaction center subunit VI, chloroplastic OS=Spinacia oleracea GN=PSAH PE=1 SV=1//1.38503e-59
CSA004992	4441.12	78.4339	5.8233	3.3519e-22	8.5001e-20	--	sp|Q9FKL6|CB60B_ARATH Calmodulin-binding protein 60 B OS=Arabidopsis thaliana GN=CBP60B PE=2 SV=1//4.77994e-53
CSA005005	6.27079	37.467	-2.5789	0.0010682	0.0077771	--	sp|F4I037|TBL7_ARATH Protein trichome berefringence-like 7 OS=Arabidopsis thaliana GN=TBL7 PE=3 SV=1//8.93399e-54
CSA005010	302.354	149.863	1.0126	0.0071121	0.035279	--	-//-
CSA005016	524.144	76.7433	2.7719	3.8377e-12	2.3444e-10	--	sp|Q9FY99|G6PD2_ARATH Glucose-6-phosphate 1-dehydrogenase 2, chloroplastic OS=Arabidopsis thaliana GN=At5g13110 PE=2 SV=2//6.50468e-67
CSA005018	245.543	589.107	-1.2626	0.00063373	0.0050632	--	sp|A6XIG6|SLMH_HYDIT 4-sulfomuconolactone hydrolase OS=Hydrogenophaga intermedia PE=1 SV=1//2.99249e-09
CSA005022	8.49442	47.3017	-2.4773	0.0079967	0.038669	--	-//-
CSA005023	109.991	1043.28	-3.2457	1.1095e-05	0.00016228	--	-//-
CSA005024	29.2516	257.21	-3.1364	4.5701e-05	0.00054747	--	-//-
CSA005025	41.7562	370.192	-3.1482	9.184e-06	0.00013789	--	-//-
CSA005039	66.1178	1244.76	-4.2347	1.6064e-07	3.81e-06	--	sp|Q8W3Z1|BAMS_BETPL Beta-amyrin synthase OS=Betula platyphylla GN=OSCBPY PE=1 SV=1//0
CSA005045	4664.36	2163.78	1.1081	0.0015005	0.010245	--	-//-
CSA005049	68.4125	209.197	-1.6125	0.00060293	0.0048619	--	sp|Q941D6|HDA14_ARATH Histone deacetylase 14 OS=Arabidopsis thaliana GN=HDA14 PE=2 SV=1//1.58472e-169
CSA005050	25.9121	67.1619	-1.374	0.0089917	0.042358	--	sp|Q941D6|HDA14_ARATH Histone deacetylase 14 OS=Arabidopsis thaliana GN=HDA14 PE=2 SV=1//3.96558e-20
CSA005054	7.14521	36.0658	-2.3356	0.00069154	0.0054377	--	sp|Q9LHD1|AB15B_ARATH ABC transporter B family member 15 OS=Arabidopsis thaliana GN=ABCB15 PE=3 SV=1//3.1635e-105
CSA005055	30.9633	306.14	-3.3056	3.9218e-08	1.0902e-06	--	sp|O22881|POT2_ARATH Potassium transporter 2 OS=Arabidopsis thaliana GN=POT2 PE=1 SV=2//0
CSA005060	63.4448	189.2	-1.5763	0.00016932	0.0016738	--	sp|Q9SA96|AROD1_ARATH Arogenate dehydratase/prephenate dehydratase 1, chloroplastic OS=Arabidopsis thaliana GN=ADT1 PE=1 SV=1//6.54701e-169
CSA005061	13.7884	45.8742	-1.7342	0.0038917	0.021888	--	-//-
CSA005074	266.273	1473.68	-2.4684	4.0542e-11	1.9825e-09	--	sp|Q98C03|DHAA_RHILO Haloalkane dehalogenase OS=Rhizobium loti (strain MAFF303099) GN=dhaA PE=3 SV=1//4.93557e-11
CSA005087	829.515	4933.03	-2.5721	8.304e-07	1.6345e-05	--	sp|O04933|SPSA2_CRAPL Probable sucrose-phosphate synthase 2 OS=Craterostigma plantagineum GN=SPS2 PE=2 SV=1//0
CSA005090	756.301	375.142	1.0115	0.0046351	0.025268	--	-//-
CSA005094	273.159	652.446	-1.2561	0.00047439	0.0039814	--	sp|Q38998|AKT1_ARATH Potassium channel AKT1 OS=Arabidopsis thaliana GN=AKT1 PE=1 SV=2//0
CSA005095	311.509	671.628	-1.1084	0.0016951	0.011274	--	sp|Q38998|AKT1_ARATH Potassium channel AKT1 OS=Arabidopsis thaliana GN=AKT1 PE=1 SV=2//2.23881e-76
CSA005098	0	61.9429	#NAME?	0.00065171	0.0051815	--	-//-
CSA005115	243.213	2454.14	-3.3349	1.0857e-18	1.7035e-16	--	sp|O65583|UKL4_ARATH Uridine kinase-like protein 4 OS=Arabidopsis thaliana GN=UKL4 PE=2 SV=2//0
CSA005116	663.825	6076.24	-3.1943	8.7005e-05	0.00095062	--	sp|P46256|ALF1_PEA Fructose-bisphosphate aldolase, cytoplasmic isozyme 1 OS=Pisum sativum PE=2 SV=1//0
CSA005120	9.71342	39.6698	-2.03	0.0035581	0.020437	--	sp|Q9FF17|ALG6_ARATH Probable dolichyl pyrophosphate Man9GlcNAc2 alpha-1,3-glucosyltransferase OS=Arabidopsis thaliana GN=At5g38460 PE=2 SV=1//5.05863e-68
CSA005126	7.23833	62.8958	-3.1192	4.3376e-07	9.2154e-06	--	sp|Q93ZY7|NUD12_ARATH Nudix hydrolase 12, mitochondrial OS=Arabidopsis thaliana GN=NUDT12 PE=2 SV=1//1.21867e-17
CSA005127	74.4326	326.032	-2.131	1.016e-07	2.5425e-06	--	sp|Q52K88|NUD13_ARATH Nudix hydrolase 13, mitochondrial OS=Arabidopsis thaliana GN=NUDT13 PE=1 SV=1//2.54569e-30
CSA005128	2.55881	302.499	-6.8853	2.1056e-09	7.5464e-08	--	-//-
CSA005129	16.2917	1672.78	-6.682	9.9618e-12	5.4862e-10	--	sp|O65709|FAO4A_ARATH Long-chain-alcohol oxidase FAO4A OS=Arabidopsis thaliana GN=FAO4A PE=3 SV=2//0
CSA005130	4.14027	47.7414	-3.5274	2.0848e-05	0.00027785	--	-//-
CSA005132	308.038	123.278	1.3212	0.00060624	0.0048823	--	sp|Q93V61|LCAT3_ARATH Phospholipase A(1) LCAT3 OS=Arabidopsis thaliana GN=LCAT3 PE=1 SV=1//1.03203e-55
CSA005136	171.534	77.9741	1.1374	0.0062993	0.032072	--	sp|Q9C9H7|RLP12_ARATH Receptor-like protein 12 OS=Arabidopsis thaliana GN=RLP12 PE=2 SV=2//5.2638e-25
CSA005149	10.523	147.683	-3.8109	0.0028017	0.01689	--	sp|Q08IT1|DADIS_PANGI Dammarenediol II synthase OS=Panax ginseng GN=PNA PE=1 SV=1//3.63343e-101
CSA005150	0.632768	15.9331	-4.6542	0.00030102	0.0027133	--	sp|Q08IT1|DADIS_PANGI Dammarenediol II synthase OS=Panax ginseng GN=PNA PE=1 SV=1//8.70664e-24
CSA005152	212.104	53.3514	1.9912	0.010527	0.047996	--	sp|Q8H038|KATAM_ORYSJ Xyloglucan galactosyltransferase KATAMARI1 homolog OS=Oryza sativa subsp. japonica GN=Os03g0144800 PE=2 SV=1//5.00925e-151
CSA005158	877.616	356.995	1.2977	0.0039023	0.021937	--	sp|Q40062|IDS3_HORVU 2&apos;-deoxymugineic-acid 2&apos;-dioxygenase OS=Hordeum vulgare GN=IDS3 PE=1 SV=3//3.70999e-20
CSA005168	999.001	473.123	1.0783	0.0026071	0.01596	--	sp|P17928|CALM_MEDSA Calmodulin OS=Medicago sativa GN=CAL1 PE=2 SV=2//1.54834e-06
CSA005169	938.584	402.625	1.221	0.00069701	0.0054719	--	sp|Q7DMP0|CALM2_SOLTU Calmodulin-2/4 (Fragment) OS=Solanum tuberosum GN=PCM2 PE=2 SV=1//3.07917e-30
CSA005177	24.0227	138.297	-2.5253	0.0065179	0.032942	--	sp|O80340|ERF78_ARATH Ethylene-responsive transcription factor 4 OS=Arabidopsis thaliana GN=ERF4 PE=1 SV=1//6.21143e-23
CSA005182	220.86	486.404	-1.139	0.003791	0.021442	--	-//-
CSA005196	10.8567	49.3934	-2.1857	0.00052975	0.0043621	--	sp|Q6K5Q0|GL21_ORYSJ Putative germin-like protein 2-1 OS=Oryza sativa subsp. japonica GN=Os02g0491600 PE=3 SV=1//2.51612e-87
CSA005201	6.19652	73.7289	-3.5727	2.5036e-06	4.3715e-05	--	sp|Q91XF4|RN167_MOUSE E3 ubiquitin-protein ligase RNF167 OS=Mus musculus GN=Rnf167 PE=2 SV=1//4.85487e-12
CSA005202	5.10822	112.933	-4.4665	1.7865e-09	6.5371e-08	--	-//-
CSA005204	134.94	331.993	-1.2988	0.0082818	0.039746	--	sp|Q9CAC4|MYOB2_ARATH Myosin-binding protein 2 OS=Arabidopsis thaliana GN=MYOB2 PE=1 SV=1//6.25247e-20
CSA005205	1422.63	638.539	1.1557	0.001204	0.0085848	--	sp|Q8LBH2|CAP8_ARATH Putative clathrin assembly protein At2g01600 OS=Arabidopsis thaliana GN=At2g01600 PE=2 SV=2//0
CSA005206	987.566	452.368	1.1264	0.0023371	0.014633	--	sp|O23006|LYM2_ARATH LysM domain-containing GPI-anchored protein 2 OS=Arabidopsis thaliana GN=LYM2 PE=1 SV=1//1.00458e-95
CSA005209	226.9	73.8619	1.6192	0.00012305	0.0012745	--	sp|Q9FHD7|Y5126_ARATH Probable serine/threonine-protein kinase At5g41260 OS=Arabidopsis thaliana GN=At5g41260 PE=1 SV=1//0
CSA005217	1365.4	21.014	6.0218	2.647e-40	5.7726e-37	--	sp|Q9SDW0|TGT3A_ARATH Trihelix transcription factor GT-3a OS=Arabidopsis thaliana GN=GT-3A PE=1 SV=1//4.83103e-49
CSA005218	203.566	95.3873	1.0936	0.0063608	0.032305	--	sp|O81275|CSK2D_ARATH Casein kinase II subunit beta-3 OS=Arabidopsis thaliana GN=CKB3 PE=1 SV=1//9.11031e-07
CSA005221	262.019	119.428	1.1335	0.0037296	0.021173	--	sp|O80507|CSK2E_ARATH Putative casein kinase II subunit beta-4 OS=Arabidopsis thaliana GN=At2g44680 PE=2 SV=1//2.41941e-07
CSA005230	382.72	792.555	-1.0502	0.0036628	0.020892	--	sp|Q5G1S8|PP241_ARATH Pentatricopeptide repeat-containing protein At3g18110, chloroplastic OS=Arabidopsis thaliana GN=EMB1270 PE=2 SV=2//0
CSA005238	100.27	205.562	-1.0357	0.010879	0.049211	--	sp|Q9SIY5|RER5_ARATH Protein RETICULATA-RELATED 5 OS=Arabidopsis thaliana GN=RER5 PE=2 SV=1//8.38182e-09
CSA005242	583.963	6588.16	-3.4959	2.9619e-13	2.1424e-11	--	sp|Q70E96|AL3F1_ARATH Aldehyde dehydrogenase family 3 member F1 OS=Arabidopsis thaliana GN=ALDH3F1 PE=2 SV=2//9.26214e-173
CSA005243	78.6556	327.323	-2.0571	1.9598e-07	4.5542e-06	--	sp|Q70E96|AL3F1_ARATH Aldehyde dehydrogenase family 3 member F1 OS=Arabidopsis thaliana GN=ALDH3F1 PE=2 SV=2//1.28019e-07
CSA005244	379.064	811.401	-1.098	0.0058509	0.03025	--	sp|Q3M929|DER_ANAVT GTPase Der OS=Anabaena variabilis (strain ATCC 29413 / PCC 7937) GN=der PE=3 SV=1//1.15675e-150
CSA005245	116.769	3.04262	5.2622	4.1073e-17	5.2691e-15	--	sp|Q40392|TMVRN_NICGU TMV resistance protein N OS=Nicotiana glutinosa GN=N PE=1 SV=1//2.02912e-06
CSA005246	193.105	24.8266	2.9594	5.4644e-11	2.6135e-09	--	-//-
CSA005267	683.162	321.847	1.0859	0.0073934	0.036368	--	sp|Q8LPB4|PSKR1_DAUCA Phytosulfokine receptor 1 OS=Daucus carota GN=PSKR PE=1 SV=1//5.17918e-09
CSA005284	2819.71	154.915	4.186	5.8754e-07	1.2082e-05	--	sp|Q6PQJ9|5BPOR_DIGLA 3-oxo-Delta(4,5)-steroid 5-beta-reductase OS=Digitalis lanata PE=1 SV=1//0
CSA005312	0	7.17776	#NAME?	0.0062307	0.031785	--	sp|Q84M91|TANB_ARATH Probable microtubule-binding protein TANGLED OS=Arabidopsis thaliana GN=TAN PE=2 SV=1//8.24659e-81
CSA005313	35.3119	155.536	-2.139	0.00072497	0.0056487	--	sp|Q75HV0|CCP31_ORYSJ Cyclin-P3-1 OS=Oryza sativa subsp. japonica GN=CYCP3-1 PE=3 SV=1//2.32324e-55
CSA005315	667.079	283.362	1.2352	0.00083473	0.0063441	--	sp|Q9ASS4|Y5838_ARATH Probably inactive leucine-rich repeat receptor-like protein kinase At5g48380 OS=Arabidopsis thaliana GN=At5g48380 PE=1 SV=1//2.19967e-58
CSA005321	1443.97	666.809	1.1147	0.0019529	0.012657	--	sp|P0CZ23|ACOX3_ARATH Acyl-coenzyme A oxidase 3, peroxisomal OS=Arabidopsis thaliana GN=ACX3 PE=1 SV=1//0
CSA005324	253.856	104.53	1.2801	0.0014522	0.010015	--	sp|P0CZ23|ACOX3_ARATH Acyl-coenzyme A oxidase 3, peroxisomal OS=Arabidopsis thaliana GN=ACX3 PE=1 SV=1//7.01933e-47
CSA005325	218.995	93.2226	1.2321	0.0025702	0.015769	--	sp|P0CZ24|Y3669_ARATH Putative acyl-coenzyme A oxidase At3g06690 OS=Arabidopsis thaliana GN=At3g06690 PE=3 SV=1//2.66419e-42
CSA005330	66.3953	304.378	-2.1967	0.0078209	0.038013	--	-//-
CSA005342	152.567	35.9987	2.0834	1.135e-05	0.00016541	--	sp|Q84RK2|FAP2_ARATH Fatty-acid-binding protein 2 OS=Arabidopsis thaliana GN=FAP2 PE=2 SV=2//8.24865e-47
CSA005346	208.361	41.9042	2.3139	6.052e-06	9.5642e-05	--	sp|Q84RK2|FAP2_ARATH Fatty-acid-binding protein 2 OS=Arabidopsis thaliana GN=FAP2 PE=2 SV=2//1.0365e-29
CSA005349	61.6038	3334.41	-5.7583	0.00016484	0.0016374	--	sp|P33629|TBA_PRUDU Tubulin alpha chain OS=Prunus dulcis GN=TUBA PE=2 SV=1//0
CSA005350	33.8737	0.664728	5.6713	0.0069116	0.0345	--	sp|P04284|PR06_SOLLC Pathogenesis-related leaf protein 6 OS=Solanum lycopersicum GN=PR1B1 PE=1 SV=2//8.83895e-63
CSA005355	1047.37	16.9545	5.949	2.0103e-10	8.8035e-09	--	sp|Q5NE24|NSP2_MEDTR Nodulation-signaling pathway 2 protein OS=Medicago truncatula GN=NSP2 PE=1 SV=1//9.48451e-30
CSA005363	5900.37	442.989	3.7355	2.6178e-20	5.3106e-18	--	sp|F6HDT7|MTND2_VITVI 1,2-dihydroxy-3-keto-5-methylthiopentene dioxygenase 2 OS=Vitis vinifera GN=VIT_05s0020g04080 PE=3 SV=1//7.62901e-118
CSA005365	771.843	99.8604	2.9503	0.00037083	0.003242	--	sp|A6P6W1|CASL2_CANSA Cannabidiolic acid synthase-like 2 OS=Cannabis sativa GN=CBDAS3 PE=2 SV=1//9.12163e-132
CSA005366	494.799	3.62573	7.0924	2.1111e-09	7.56e-08	--	sp|A6P6V9|CBDAS_CANSA Cannabidiolic acid synthase OS=Cannabis sativa GN=CBDAS PE=1 SV=1//9.76152e-73
CSA005368	561.611	45.8623	3.6142	0.01093	0.04938	--	sp|Q9ZQ97|U73C4_ARATH UDP-glycosyltransferase 73C4 OS=Arabidopsis thaliana GN=UGT73C4 PE=2 SV=1//0
CSA005370	7298.55	2341.43	1.6402	2.9612e-06	5.0772e-05	--	sp|Q42551|SCE1_ARATH SUMO-conjugating enzyme SCE1 OS=Arabidopsis thaliana GN=SCE1 PE=1 SV=1//1.47193e-104
CSA005375	56.7174	245.874	-2.1161	4.0198e-05	0.00048948	--	sp|Q6DR03|ZDHC3_ARATH Protein S-acyltransferase 21 OS=Arabidopsis thaliana GN=PAT21 PE=2 SV=1//8.968e-157
CSA005377	525.777	1497.44	-1.51	0.0002437	0.0022712	--	sp|Q9LM71|FKB18_ARATH Peptidyl-prolyl cis-trans isomerase FKBP18, chloroplastic OS=Arabidopsis thaliana GN=FKBP18 PE=1 SV=2//1.25946e-81
CSA005386	280.093	122.524	1.1928	0.0016384	0.010994	--	-//-
CSA005396	1.90725	66.779	-5.1298	0.0031559	0.018599	--	-//-
CSA005397	320.764	1198.51	-1.9017	0.0097957	0.045309	--	sp|Q8L7S4|MP702_ARATH Microtubule-associated protein 70-2 OS=Arabidopsis thaliana GN=MAP70.2 PE=1 SV=1//0
CSA005401	692.309	17.8312	5.2789	8.0175e-11	3.7401e-09	--	sp|P50134|DCOR_DATST Ornithine decarboxylase OS=Datura stramonium PE=2 SV=1//0
CSA005408	0.930356	32.8363	-5.1414	1.2073e-07	2.9651e-06	--	sp|P10978|POLX_TOBAC Retrovirus-related Pol polyprotein from transposon TNT 1-94 OS=Nicotiana tabacum PE=2 SV=1//3.44228e-09
CSA005412	838.584	85.3919	3.2958	6.0524e-17	7.3946e-15	--	sp|Q54I39|IST1L_DICDI IST1-like protein OS=Dictyostelium discoideum GN=DDB_G0289029 PE=3 SV=1//3.07986e-19
CSA005413	139.451	603.101	-2.1126	3.6715e-08	1.0285e-06	--	-//-
CSA005414	9.03412	73.1439	-3.0173	1.961e-07	4.5545e-06	--	sp|Q9FX64|HOP2_ARATH Homologous-pairing protein 2 homolog OS=Arabidopsis thaliana GN=HOP2 PE=1 SV=1//4.88224e-124
CSA005416	1489.57	3108.81	-1.0615	0.0018245	0.01198	--	sp|Q9Y7K5|YGI3_SCHPO Uncharacterized WD repeat-containing protein C2A9.03 OS=Schizosaccharomyces pombe (strain 972 / ATCC 24843) GN=SPBC2A9.03 PE=3 SV=2//9.82084e-39
CSA005417	5353.73	140.021	5.2568	9.9729e-32	8.0554e-29	--	sp|Q9LY87|RGLG2_ARATH E3 ubiquitin-protein ligase RGLG2 OS=Arabidopsis thaliana GN=RGLG2 PE=1 SV=1//1.22709e-155
CSA005437	4410.55	1135.04	1.9582	2.9143e-08	8.3517e-07	--	sp|Q0WMJ8|SIPL4_ARATH Signal peptide peptidase-like 4 OS=Arabidopsis thaliana GN=SPPL4 PE=2 SV=1//3.64115e-137
CSA005439	6182.46	1468.76	2.0736	4.9106e-09	1.6565e-07	--	sp|Q0DWA9|SIPL4_ORYSJ Signal peptide peptidase-like 4 OS=Oryza sativa subsp. japonica GN=SPPL4 PE=2 SV=1//2.14963e-135
CSA005444	24.5821	86.091	-1.8083	0.00031246	0.0027965	--	sp|P83326|PMEI_ACTDE Pectinesterase inhibitor OS=Actinidia deliciosa GN=PMEI PE=1 SV=2//2.16664e-15
CSA005449	12764	931.795	3.7759	8.1388e-10	3.1924e-08	--	sp|P48021|HMDH_CAMAC 3-hydroxy-3-methylglutaryl-coenzyme A reductase OS=Camptotheca acuminata PE=3 SV=1//0
CSA005451	130.372	36.7938	1.8251	6.2303e-05	0.00071569	--	-//-
CSA005462	44.6036	121.023	-1.44	0.0014603	0.01004	--	sp|P0C2F6|RNHX1_ARATH Putative ribonuclease H protein At1g65750 OS=Arabidopsis thaliana GN=At1g65750 PE=3 SV=1//9.08359e-11
CSA005463	10.7091	34.8752	-1.7034	0.010125	0.046518	--	-//-
CSA005465	2671.29	1261.55	1.0823	0.0021675	0.013772	--	sp|O23461|ARAK_ARATH L-arabinokinase OS=Arabidopsis thaliana GN=ARA1 PE=1 SV=1//0
CSA005467	23.3067	77.204	-1.7279	0.00068308	0.0053818	--	sp|P54121|AIG2_ARATH Protein AIG2 OS=Arabidopsis thaliana GN=AIG2 PE=2 SV=1//8.37225e-21
CSA005468	10.9136	36.0652	-1.7245	0.0077152	0.037679	--	-//-
CSA005469	16.2729	64.7183	-1.9917	0.00030834	0.002765	--	-//-
CSA005470	4842	2338.84	1.0498	0.0024756	0.015303	--	sp|Q8LD27|PSB6_ARATH Proteasome subunit beta type-6 OS=Arabidopsis thaliana GN=PBA1 PE=1 SV=2//1.5991e-148
CSA005471	414.146	87.9318	2.2357	0.0014446	0.0099692	--	sp|Q641Z5|CHAC2_RAT Putative glutathione-specific gamma-glutamylcyclotransferase 2 OS=Rattus norvegicus GN=Chac2 PE=2 SV=1//9.72528e-32
CSA005490	231.023	98.4096	1.2312	0.0024996	0.015417	--	-//-
CSA005499	167.708	79.5483	1.076	0.009105	0.042762	--	-//-
CSA005500	1.69333	15.3908	-3.1841	0.0034388	0.01988	--	-//-
CSA005506	369.047	1046.67	-1.5039	3.0692e-05	0.0003878	--	sp|Q9M310|FBK77_ARATH F-box/kelch-repeat protein At3g61590 OS=Arabidopsis thaliana GN=At3g61590 PE=1 SV=1//0
CSA005507	183.897	944.531	-2.3607	5.7163e-10	2.298e-08	--	-//-
CSA005509	820.027	3424.44	-2.0621	0.0001082	0.0011455	--	sp|P82658|TL19_ARATH Thylakoid lumenal 19 kDa protein, chloroplastic OS=Arabidopsis thaliana GN=At3g63540 PE=1 SV=2//1.52284e-87
CSA005511	22.021	0.356056	5.9506	3.1776e-06	5.4056e-05	--	sp|C0LGT6|EFR_ARATH LRR receptor-like serine/threonine-protein kinase EFR OS=Arabidopsis thaliana GN=EFR PE=1 SV=1//3.24871e-10
CSA005513	6.30843	242.633	-5.2654	0.0026053	0.015951	--	sp|Q8W3P8|AOG_PHAAN Abscisate beta-glucosyltransferase OS=Phaseolus angularis GN=AOG PE=1 SV=1//7.69408e-136
CSA005514	56.5647	275.799	-2.2856	7.3914e-05	0.00082664	--	sp|Q9FH90|IX14H_ARATH Probable beta-1,4-xylosyltransferase IRX14H OS=Arabidopsis thaliana GN=IRX14H PE=2 SV=1//0
CSA005515	850.927	352.242	1.2725	0.00048962	0.0040857	--	sp|Q6P1R4|DUS1L_HUMAN tRNA-dihydrouridine(16/17) synthase [NAD(P)(+)]-like OS=Homo sapiens GN=DUS1L PE=1 SV=1//4.35167e-51
CSA005518	241.566	103.684	1.2202	0.0020413	0.013117	--	sp|Q9HGN6|DUS1_SCHPO tRNA-dihydrouridine(16/17) synthase [NAD(P)(+)] OS=Schizosaccharomyces pombe (strain 972 / ATCC 24843) GN=dus1 PE=3 SV=1//8.92283e-15
CSA005519	3351.11	1105.48	1.6	0.0015598	0.010566	--	sp|Q9STX0|WRKY7_ARATH Probable WRKY transcription factor 7 OS=Arabidopsis thaliana GN=WRKY7 PE=2 SV=1//1.38241e-73
CSA005521	43.4015	112.224	-1.3706	0.010814	0.048962	--	sp|O08586|PTEN_MOUSE Phosphatidylinositol 3,4,5-trisphosphate 3-phosphatase and dual-specificity protein phosphatase PTEN OS=Mus musculus GN=Pten PE=1 SV=1//5.04216e-42
CSA005533	417.304	208.304	1.0024	0.0075345	0.036933	--	sp|Q67XX3|FB252_ARATH F-box protein At5g06550 OS=Arabidopsis thaliana GN=At5g06550 PE=2 SV=1//0
CSA005540	1713.51	831.659	1.0429	0.0030415	0.018054	--	sp|Q9SZH4|PEP_ARATH RNA-binding KH domain-containing protein PEPPER OS=Arabidopsis thaliana GN=PEP PE=2 SV=1//1.7091e-156
CSA005544	183.137	376.984	-1.0416	0.0060369	0.030996	--	sp|F8WKW0|UGT1_GARJA Crocetin glucosyltransferase, chloroplastic OS=Gardenia jasminoides GN=UGT75L6 PE=1 SV=1//0
CSA005546	150.613	889.66	-2.5624	1.6791e-11	8.8881e-10	--	sp|F4I9E1|NFD4_ARATH Protein NUCLEAR FUSION DEFECTIVE 4 OS=Arabidopsis thaliana GN=NFD4 PE=3 SV=1//9.20617e-44
CSA005547	2.80047	25.6638	-3.196	0.00023239	0.0021835	--	sp|O94163|XYNF1_ASPOR Endo-1,4-beta-xylanase F1 OS=Aspergillus oryzae (strain ATCC 42149 / RIB 40) GN=xynF1 PE=1 SV=1//4.59199e-23
CSA005559	4361.29	913.182	2.2558	2.2621e-09	8.0677e-08	--	sp|Q9LMA8|TI10A_ARATH Protein TIFY 10A OS=Arabidopsis thaliana GN=TIFY10A PE=1 SV=1//1.04639e-22
CSA005568	625.911	1523.23	-1.2831	0.00037265	0.0032553	--	sp|P48279|YCF39_CYAPA Uncharacterized protein ycf39 OS=Cyanophora paradoxa GN=ycf39 PE=3 SV=1//3.89149e-93
CSA005571	959.651	2020.37	-1.074	0.0026573	0.016205	--	sp|Q6G1I3|IF3_BARQU Translation initiation factor IF-3 OS=Bartonella quintana (strain Toulouse) GN=infC PE=3 SV=1//9.96505e-09
CSA005574	92.1863	509.16	-2.4655	2.0856e-05	0.00027785	--	sp|Q8RY65|NIK2_ARATH Protein NSP-INTERACTING KINASE 2 OS=Arabidopsis thaliana GN=NIK2 PE=1 SV=1//7.6963e-68
CSA005575	2507.22	1249.17	1.0051	0.0039643	0.022211	--	sp|Q5R8S3|PDCD4_PONAB Programmed cell death protein 4 OS=Pongo abelii GN=PDCD4 PE=2 SV=1//1.33878e-06
CSA005581	965.695	378.829	1.35	0.00018405	0.0017951	--	sp|Q8GYU3|IYO_ARATH Transcriptional elongation regulator MINIYO OS=Arabidopsis thaliana GN=IYO PE=1 SV=1//1.11377e-13
CSA005585	367.539	1356.29	-1.8837	1.8715e-07	4.3699e-06	--	sp|Q2MHE4|HT1_ARATH Serine/threonine-protein kinase HT1 OS=Arabidopsis thaliana GN=HT1 PE=1 SV=1//2.00053e-77
CSA005593	965.209	302.231	1.6752	5.0511e-06	8.1538e-05	--	sp|Q9XF19|AB21I_ARATH ABC transporter I family member 21 OS=Arabidopsis thaliana GN=ABCI21 PE=2 SV=1//9.17539e-127
CSA005600	235.74	1.89283	6.9605	0.00011653	0.0012155	--	sp|H1A988|C7254_GLYUR 11-oxo-beta-amyrin 30-oxidase OS=Glycyrrhiza uralensis GN=CYP72A154 PE=1 SV=1//1.70216e-178
CSA005610	627.082	126.093	2.3142	9.5971e-10	3.7142e-08	--	sp|Q9ZRF1|MTDH_FRAAN Probable mannitol dehydrogenase OS=Fragaria ananassa GN=CAD PE=2 SV=1//0
CSA005626	109.519	17.4113	2.6531	0.0003394	0.0030046	--	sp|Q56YU0|AL2C4_ARATH Aldehyde dehydrogenase family 2 member C4 OS=Arabidopsis thaliana GN=ALDH2C4 PE=1 SV=2//1.25402e-80
CSA005627	29.6221	7.86551	1.9131	0.0073163	0.036078	--	sp|Q56YU0|AL2C4_ARATH Aldehyde dehydrogenase family 2 member C4 OS=Arabidopsis thaliana GN=ALDH2C4 PE=1 SV=2//3.30363e-21
CSA005632	1094.11	319.5	1.7759	0.00015337	0.0015442	--	-//-
CSA005633	1044.5	286.867	1.8644	4.1363e-05	0.0005024	--	-//-
CSA005637	101.513	205.426	-1.0169	0.010648	0.048383	--	sp|Q5W7F2|AGD3_ARATH ADP-ribosylation factor GTPase-activating protein AGD3 OS=Arabidopsis thaliana GN=AGD3 PE=1 SV=1//1.42675e-30
CSA005643	104.293	416.578	-1.9979	0.0089108	0.04207	--	-//-
CSA005649	132.714	30.1194	2.1396	4.1131e-06	6.8006e-05	--	sp|Q13231|CHIT1_HUMAN Chitotriosidase-1 OS=Homo sapiens GN=CHIT1 PE=1 SV=1//5.91246e-34
CSA005663	1095.83	396.671	1.466	5.264e-05	0.00061786	--	sp|Q0WQF7|ODP21_ARATH Dihydrolipoyllysine-residue acetyltransferase component 1 of pyruvate dehydrogenase complex, mitochondrial OS=Arabidopsis thaliana GN=LTA3 PE=2 SV=2//0
CSA005668	48.5704	974.083	-4.3259	1.7195e-13	1.2954e-11	--	sp|Q8W4K5|VAB_ARATH VAN3-binding protein OS=Arabidopsis thaliana GN=VAB PE=1 SV=1//2.62492e-101
CSA005670	5942.4	646.378	3.2006	4.817e-12	2.8821e-10	--	sp|Q9MA63|Y3550_ARATH REF/SRPP-like protein At3g05500 OS=Arabidopsis thaliana GN=At3g05500 PE=1 SV=1//2.40006e-73
CSA005689	1789.96	811.308	1.1416	0.0011235	0.0080928	--	sp|Q9P7X8|RPA2_SCHPO Probable DNA-directed RNA polymerase I subunit RPA2 OS=Schizosaccharomyces pombe (strain 972 / ATCC 24843) GN=rpa2 PE=3 SV=2//0
CSA005690	912.547	303.7	1.5873	0.0018729	0.012233	--	sp|Q9SVG0|ANTL2_ARATH Amino acid transporter ANTL2 OS=Arabidopsis thaliana GN=At4g38250 PE=1 SV=1//0
CSA005707	146.114	53.5094	1.4492	0.00071457	0.0055846	--	sp|P59583|WRK32_ARATH Probable WRKY transcription factor 32 OS=Arabidopsis thaliana GN=WRKY32 PE=2 SV=1//4.30169e-09
CSA005708	72.5768	27.7396	1.3876	0.0050299	0.026893	--	-//-
CSA005709	97.9217	40.5649	1.2714	0.005432	0.028539	--	sp|Q56Y11|DDPS2_ARATH Dehydrodolichyl diphosphate synthase 2 OS=Arabidopsis thaliana GN=At5g58770 PE=2 SV=2//1.12298e-105
CSA005724	763.899	182.896	2.0624	9.2509e-05	0.0010037	--	sp|Q0WNJ6|CLAH1_ARATH Clathrin heavy chain 1 OS=Arabidopsis thaliana GN=CHC1 PE=1 SV=1//4.07219e-37
CSA005725	3789.17	391.106	3.2763	2.1934e-08	6.4669e-07	--	sp|O80871|P2C25_ARATH Probable protein phosphatase 2C 25 OS=Arabidopsis thaliana GN=At2g30020 PE=1 SV=1//5.45088e-137
CSA005732	4476.24	1751.24	1.3539	9.379e-05	0.0010156	--	sp|Q8LGG8|USPAL_ARATH Universal stress protein A-like protein OS=Arabidopsis thaliana GN=At3g01520 PE=1 SV=2//1.14902e-20
CSA005733	226.719	2.75368	6.3634	0.0051803	0.027501	--	sp|Q9LDE1|MY108_ARATH Transcription factor MYB108 OS=Arabidopsis thaliana GN=MYB108 PE=1 SV=1//1.61656e-59
CSA005740	316.344	1608.82	-2.3464	2.7084e-10	1.157e-08	--	sp|Q3AF07|DNAJ_CARHZ Chaperone protein DnaJ OS=Carboxydothermus hydrogenoformans (strain ATCC BAA-161 / DSM 6008 / Z-2901) GN=dnaJ PE=3 SV=1//4.48367e-12
CSA005741	313.559	1463.48	-2.2226	2.1292e-09	7.6122e-08	--	-//-
CSA005755	18.0682	3.16833	2.5117	0.0093633	0.043693	--	-//-
CSA005757	1154.96	526.473	1.1334	0.006719	0.033756	--	sp|Q9ZUL3|IDD5_ARATH Protein indeterminate-domain 5, chloroplastic OS=Arabidopsis thaliana GN=IDD5 PE=1 SV=1//3.78829e-08
CSA005760	147.692	369.909	-1.3246	0.00057127	0.0046496	--	sp|O65693|RBFA_ARATH Probable ribosome-binding factor A, chloroplastic OS=Arabidopsis thaliana GN=At4g34730 PE=2 SV=2//1.9101e-34
CSA005765	1096.1	3830.01	-1.805	0.0019953	0.012866	--	sp|Q02585|UCRIB_TOBAC Cytochrome b6-f complex iron-sulfur subunit 2, chloroplastic OS=Nicotiana tabacum GN=petC2 PE=2 SV=1//9.1394e-10
CSA005768	511.125	119.113	2.1014	3.0413e-08	8.6474e-07	--	sp|U3U992|UGT8_CATRO 7-deoxyloganetic acid glucosyltransferase OS=Catharanthus roseus GN=UGT709C2 PE=1 SV=1//7.92824e-179
CSA005770	20.1992	1013.23	-5.6485	0.0083118	0.039848	--	sp|Q8GY61|BH063_ARATH Transcription factor bHLH63 OS=Arabidopsis thaliana GN=BHLH63 PE=1 SV=1//3.15025e-57
CSA005771	27.6209	1.32288	4.384	0.0014114	0.0097827	--	sp|O80961|MLO12_ARATH MLO-like protein 12 OS=Arabidopsis thaliana GN=MLO12 PE=2 SV=2//7.4065e-47
CSA005774	54.2329	122.66	-1.1774	0.0083896	0.040124	--	sp|Q9XG54|OPR1_SOLLC 12-oxophytodienoate reductase 1 OS=Solanum lycopersicum GN=OPR1 PE=1 SV=1//2.90399e-54
CSA005782	12.7649	81.8512	-2.6808	1.0705e-06	2.0578e-05	--	sp|Q9SCY5|KINB2_ARATH SNF1-related protein kinase regulatory subunit beta-2 OS=Arabidopsis thaliana GN=KINB2 PE=1 SV=1//1.12016e-12
CSA005783	643.151	317.371	1.019	0.0050041	0.02679	--	sp|O19071|MGAT2_PIG Alpha-1,6-mannosyl-glycoprotein 2-beta-N-acetylglucosaminyltransferase OS=Sus scrofa GN=MGAT2 PE=3 SV=1//5.17152e-43
CSA005784	535.226	2604.59	-2.2828	1.1956e-05	0.00017251	--	-//-
CSA005785	763.646	41.8594	4.1893	6.1309e-12	3.5702e-10	--	-//-
CSA005786	862.025	262.592	1.7149	2.9862e-06	5.1119e-05	--	sp|Q8L746|NPR3_ARATH Regulatory protein NPR3 OS=Arabidopsis thaliana GN=NPR3 PE=1 SV=1//2.44981e-144
CSA005787	131.62	47.1444	1.4812	0.00079323	0.0060868	--	sp|Q8L746|NPR3_ARATH Regulatory protein NPR3 OS=Arabidopsis thaliana GN=NPR3 PE=1 SV=1//1.57413e-51
CSA005788	309.807	723.535	-1.2237	0.0018146	0.011929	--	sp|Q689D6|RPD1_ARATH Protein ROOT PRIMORDIUM DEFECTIVE 1 OS=Arabidopsis thaliana GN=RPD1 PE=1 SV=1//1.22766e-35
CSA005789	92.8343	211.682	-1.1892	0.0037228	0.021151	--	sp|Q9SV26|PP297_ARATH Pentatricopeptide repeat-containing protein At4g01030, mitochondrial OS=Arabidopsis thaliana GN=PCMP-H65 PE=3 SV=2//8.65798e-10
CSA005815	330.013	1342.25	-2.0241	7.4031e-05	0.00082753	--	sp|Q41142|PLDA1_RICCO Phospholipase D alpha 1 OS=Ricinus communis GN=PLD1 PE=1 SV=1//0
CSA005816	1053.24	332.775	1.6622	8.2244e-06	0.00012525	--	sp|Q9S9K4|ASPL2_ARATH Aspartic proteinase-like protein 2 OS=Arabidopsis thaliana GN=At1g65240 PE=1 SV=2//4.64794e-73
CSA005818	14.9881	55.6095	-1.8915	0.00069193	0.0054397	--	-//-
CSA005825	156.864	502.678	-1.6801	0.0036677	0.020909	--	sp|Q8RY65|NIK2_ARATH Protein NSP-INTERACTING KINASE 2 OS=Arabidopsis thaliana GN=NIK2 PE=1 SV=1//0
CSA005826	41.4515	118.332	-1.5133	0.0027836	0.016801	--	sp|Q9LFS4|NIK1_ARATH Protein NSP-INTERACTING KINASE 1 OS=Arabidopsis thaliana GN=NIK1 PE=1 SV=1//4.31045e-40
CSA005847	209.079	73.0735	1.5166	0.00027817	0.0025345	--	sp|Q27GK7|TPR4_ARATH Topless-related protein 4 OS=Arabidopsis thaliana GN=TPR4 PE=1 SV=2//1.64772e-172
CSA005850	2324.21	755.841	1.6206	3.3465e-05	0.0004174	--	sp|Q8LF20|CAP2_ARATH Putative clathrin assembly protein At2g25430 OS=Arabidopsis thaliana GN=At2g25430 PE=1 SV=2//0
CSA005857	10.4952	55.4904	-2.4025	5.5177e-05	0.00064332	--	sp|P93004|PIP27_ARATH Aquaporin PIP2-7 OS=Arabidopsis thaliana GN=PIP2-7 PE=1 SV=2//2.63893e-142
CSA005859	865.958	12.2593	6.1424	1.7364e-08	5.2231e-07	--	sp|Q6WNQ8|C81E8_MEDTR Cytochrome P450 81E8 OS=Medicago truncatula GN=CYP81E8 PE=2 SV=1//9.03083e-180
CSA005863	13.2774	52.7308	-1.9897	0.00079481	0.006097	--	-//-
CSA005866	1907.54	6231.88	-1.708	0.00052708	0.0043409	--	sp|Q8H112|PGL1A_ARATH PGR5-like protein 1A, chloroplastic OS=Arabidopsis thaliana GN=PGRL1A PE=1 SV=1//1.76219e-141
CSA005875	1913.66	914.173	1.0658	0.0030752	0.018216	--	sp|Q96PM5|ZN363_HUMAN RING finger and CHY zinc finger domain-containing protein 1 OS=Homo sapiens GN=RCHY1 PE=1 SV=1//4.75566e-59
CSA005887	7.31255	33.2121	-2.1833	0.0018702	0.012221	--	sp|Q67XQ0|Y4424_ARATH DUF21 domain-containing protein At4g14240 OS=Arabidopsis thaliana GN=CBSDUF1 PE=1 SV=1//0
CSA005888	289.649	2390.99	-3.0452	1.0239e-08	3.2245e-07	--	sp|Q9LR64|PB27A_ARATH Photosystem II repair protein PSB27-H1, chloroplastic OS=Arabidopsis thaliana GN=PSB27-1 PE=1 SV=1//2.13743e-61
CSA005895	560.405	239.09	1.2289	0.0010267	0.0075302	--	sp|Q6A333|ALY2_ARATH Protein ALWAYS EARLY 2 OS=Arabidopsis thaliana GN=ALY2 PE=1 SV=1//5.17679e-09
CSA005897	69.298	327.24	-2.2395	6.8739e-06	0.00010712	--	sp|C0LGK9|Y2242_ARATH Probable LRR receptor-like serine/threonine-protein kinase At2g24230 OS=Arabidopsis thaliana GN=At2g24230 PE=2 SV=1//1.1555e-13
CSA005899	597.372	99.2558	2.5894	2.8462e-11	1.4486e-09	--	sp|Q40392|TMVRN_NICGU TMV resistance protein N OS=Nicotiana glutinosa GN=N PE=1 SV=1//2.93442e-13
CSA005912	436.006	200.01	1.1243	0.0030009	0.017874	--	sp|Q9XER8|RAB7_GOSHI Ras-related protein Rab7 OS=Gossypium hirsutum GN=RAB7 PE=2 SV=1//6.59889e-121
CSA005914	5.71325	35.4952	-2.6352	0.00024615	0.0022887	--	sp|Q5UR45|YL572_MIMIV Putative AAA family ATPase L572 OS=Acanthamoeba polyphaga mimivirus GN=MIMI_L572 PE=3 SV=1//4.90472e-15
CSA005916	540.037	1080.98	-1.0012	0.004847	0.026129	--	sp|P0CH30|RING1_GOSHI E3 ubiquitin-protein ligase RING1 OS=Gossypium hirsutum GN=RING1 PE=1 SV=1//1.49184e-24
CSA005917	278.355	747.693	-1.4255	0.0001131	0.0011881	--	sp|P25011|CCNB1_SOYBN G2/mitotic-specific cyclin S13-6 OS=Glycine max PE=2 SV=1//7.80643e-49
CSA005937	32.8889	717.412	-4.4471	1.0247e-08	3.2247e-07	--	-//-
CSA005938	348.461	1893.61	-2.4421	5.6071e-05	0.00065183	--	-//-
CSA005941	1370.18	597.962	1.1962	0.00098419	0.0072746	--	sp|Q9SN43|CIPKC_ARATH CBL-interacting serine/threonine-protein kinase 12 OS=Arabidopsis thaliana GN=CIPK12 PE=1 SV=1//0
CSA005946	113.924	2.0758	5.7783	1.7544e-10	7.7218e-09	--	-//-
CSA005952	0	7.44563	#NAME?	0.005022	0.026863	--	sp|P32295|ARG7_VIGRR Indole-3-acetic acid-induced protein ARG7 OS=Vigna radiata var. radiata GN=ARG7 PE=2 SV=1//3.98199e-22
CSA005960	943.893	423.989	1.1546	0.0012679	0.0089588	--	sp|Q9S7T8|SPZX_ARATH Serpin-ZX OS=Arabidopsis thaliana GN=At1g47710 PE=1 SV=1//2.54628e-122
CSA005965	0.613972	22.2257	-5.1779	8.9709e-06	0.00013511	--	sp|F8WKW8|UGT9_GARJA Beta-D-glucosyl crocetin beta-1,6-glucosyltransferase OS=Gardenia jasminoides GN=UGT94E5 PE=1 SV=1//1.76062e-151
CSA005966	23029.6	189.103	6.9282	2.291e-06	4.0343e-05	--	sp|C0HJG8|BSP_BOSSE Basic secretory protease (Fragments) OS=Boswellia serrata PE=1 SV=1//9.97499e-09
CSA005970	372.837	1239.51	-1.7332	1.7709e-06	3.2265e-05	--	sp|Q93VD3|CIPKN_ARATH CBL-interacting serine/threonine-protein kinase 23 OS=Arabidopsis thaliana GN=CIPK23 PE=1 SV=1//0
CSA005974	446.155	1479.23	-1.7292	3.9284e-06	6.525e-05	--	sp|Q0WWT7|STR11_ARATH Rhodanese-like domain-containing protein 11, chloroplastic OS=Arabidopsis thaliana GN=STR11 PE=2 SV=1//2.51399e-115
CSA005976	448.865	2227.98	-2.3114	2.9876e-10	1.2676e-08	--	sp|Q9SGE0|AXS2_ARATH UDP-D-apiose/UDP-D-xylose synthase 2 OS=Arabidopsis thaliana GN=AXS2 PE=2 SV=1//0
CSA005979	1418.85	281.213	2.335	0.00080822	0.006177	--	sp|Q948U0|RBOHA_SOLTU Respiratory burst oxidase homolog protein A OS=Solanum tuberosum GN=RBOHA PE=1 SV=1//3.1142e-122
CSA005983	103.907	1179.5	-3.5048	0.0052616	0.027811	--	sp|Q8L7E9|MCAC1_ARATH Protein MID1-COMPLEMENTING ACTIVITY 1 OS=Arabidopsis thaliana GN=MCA1 PE=1 SV=1//0
CSA005985	181.965	47.5228	1.937	1.4006e-05	0.00019795	--	sp|B9EXZ6|BAT1_ORYSJ Amino-acid permease BAT1 homolog OS=Oryza sativa subsp. japonica GN=BAT1 PE=2 SV=1//0
CSA005991	221.58	70.5009	1.6521	0.00021299	0.0020262	--	sp|P05477|HSP21_SOYBN 17.9 kDa class II heat shock protein OS=Glycine max GN=HSP17.9-D PE=3 SV=1//1.20071e-77
CSA005992	347.647	1823.08	-2.3907	0.00014644	0.0014823	--	sp|E1U332|ALL12_OLEEU Isoflavone reductase-like protein OS=Olea europaea PE=1 SV=1//0
CSA005994	56.204	162.986	-1.536	0.00026359	0.0024246	--	sp|P29677|MPPA_SOLTU Mitochondrial-processing peptidase subunit alpha OS=Solanum tuberosum GN=MPP PE=1 SV=1//0
CSA006003	2377.69	1156.75	1.0395	0.0030807	0.018235	--	sp|Q9SKC9|NDUB7_ARATH NADH dehydrogenase [ubiquinone] 1 beta subcomplex subunit 7 OS=Arabidopsis thaliana GN=At2g02050 PE=3 SV=1//3.10422e-46
CSA006015	41.3716	1.02078	5.3409	2.4024e-06	4.21e-05	--	sp|Q944G5|PTR44_ARATH Protein NRT1/ PTR FAMILY 2.10 OS=Arabidopsis thaliana GN=NPF2.10 PE=1 SV=3//7.43254e-59
CSA006022	157.38	373.91	-1.2484	0.0099833	0.045997	--	sp|Q93Z81|CAX3_ARATH Vacuolar cation/proton exchanger 3 OS=Arabidopsis thaliana GN=CAX3 PE=1 SV=1//3.04877e-16
CSA006027	154.744	333.016	-1.1057	0.0035279	0.020295	--	sp|Q10LG8|TLP6_ORYSJ Tubby-like F-box protein 6 OS=Oryza sativa subsp. japonica GN=TULP6 PE=2 SV=1//6.06193e-159
CSA006028	97.2089	216.078	-1.1524	0.0038909	0.021887	--	sp|Q8VY21|TLP3_ARATH Tubby-like F-box protein 3 OS=Arabidopsis thaliana GN=TULP3 PE=1 SV=1//2.11718e-52
CSA006034	13.6779	961.667	-6.1356	0.0050992	0.027186	--	sp|O22126|FLA8_ARATH Fasciclin-like arabinogalactan protein 8 OS=Arabidopsis thaliana GN=FLA8 PE=1 SV=1//8.4394e-148
CSA006037	1.26554	34.6278	-4.7741	1.4428e-07	3.4616e-06	--	sp|Q9FZP1|HPSE3_ARATH Heparanase-like protein 3 OS=Arabidopsis thaliana GN=At5g34940 PE=2 SV=2//4.07001e-20
CSA006038	34.4262	523.847	-3.9276	3.6566e-09	1.2558e-07	--	sp|Q9FZP1|HPSE3_ARATH Heparanase-like protein 3 OS=Arabidopsis thaliana GN=At5g34940 PE=2 SV=2//1.96542e-92
CSA006044	1969.57	628.616	1.6476	0.0011094	0.0080219	--	sp|P32289|GLNA_VIGAC Glutamine synthetase nodule isozyme OS=Vigna aconitifolia PE=2 SV=1//0
CSA006062	370.906	1368.68	-1.8837	6.4748e-05	0.00073968	--	sp|Q84P23|4CLL9_ARATH 4-coumarate--CoA ligase-like 9 OS=Arabidopsis thaliana GN=4CLL9 PE=1 SV=2//1.15511e-174
CSA006070	1653.77	3470.43	-1.0694	0.0084935	0.040492	--	sp|P30155|RK27_TOBAC 50S ribosomal protein L27, chloroplastic OS=Nicotiana tabacum GN=RPL27 PE=1 SV=1//1.15621e-84
CSA006075	4918.43	41992.2	-3.0939	7.3813e-17	8.943e-15	--	sp|Q41385|PSAL_SPIOL Photosystem I reaction center subunit XI, chloroplastic OS=Spinacia oleracea GN=PSAL PE=1 SV=1//9.45574e-105
CSA006084	259.726	0.349478	9.5376	0.00073393	0.0057089	--	sp|Q9SR40|LAC7_ARATH Laccase-7 OS=Arabidopsis thaliana GN=LAC7 PE=2 SV=1//0
CSA006126	650.475	100.25	2.6979	4.5748e-12	2.7485e-10	--	sp|Q9FJL0|SMC4_ARATH Structural maintenance of chromosomes protein 4 OS=Arabidopsis thaliana GN=SMC4 PE=1 SV=1//1.88747e-13
CSA006129	2460.68	808.144	1.6064	5.4281e-06	8.7075e-05	--	sp|P13917|7SB1_SOYBN Basic 7S globulin OS=Glycine max GN=BG PE=1 SV=2//7.47499e-57
CSA006132	0.306986	268.265	-9.7713	2.6213e-36	3.0087e-33	--	sp|Q9FJD5|LAC17_ARATH Laccase-17 OS=Arabidopsis thaliana GN=LAC17 PE=2 SV=1//0
CSA006136	79.2109	21.6754	1.8696	0.00023878	0.002233	--	-//-
CSA006146	211.105	1194.2	-2.5	1.5253e-10	6.7887e-09	--	sp|Q7Y223|MAN2_ARATH Mannan endo-1,4-beta-mannosidase 2 OS=Arabidopsis thaliana GN=MAN2 PE=2 SV=1//0
CSA006147	8.75533	48.6194	-2.4733	7.5051e-05	0.00083727	--	sp|A2YMR0|NAC10_ORYSI NAC transcription factor ONAC010 OS=Oryza sativa subsp. indica GN=ONAC010 PE=3 SV=1//8.12208e-29
CSA006150	4989.31	13480.1	-1.4339	4.5457e-05	0.00054485	--	sp|P46668|ATHB6_ARATH Homeobox-leucine zipper protein ATHB-6 OS=Arabidopsis thaliana GN=ATHB-6 PE=1 SV=1//6.41955e-65
CSA006161	7.29517	84.029	-3.5259	1.2768e-09	4.8037e-08	--	sp|Q39266|ZFP7_ARATH Zinc finger protein 7 OS=Arabidopsis thaliana GN=ZFP7 PE=2 SV=1//1.4667e-19
CSA006168	810.323	2031.17	-1.3257	0.00021109	0.0020134	--	sp|Q6STH5|HF101_ARATH Fe-S cluster assembly factor HCF101, chloroplastic OS=Arabidopsis thaliana GN=HCF101 PE=1 SV=1//0
CSA006169	27.7253	149.177	-2.4277	9.1769e-06	0.00013783	--	sp|Q9SQR3|D14_ARATH Probable strigolactone esterase D14 homolog OS=Arabidopsis thaliana GN=D14 PE=1 SV=1//1.35218e-67
CSA006188	419.971	9.20484	5.5118	2.0567e-05	0.00027467	--	sp|Q8LGN0|GLR27_ARATH Glutamate receptor 2.7 OS=Arabidopsis thaliana GN=GLR2.7 PE=2 SV=3//0
CSA006189	650.986	274.222	1.2473	0.00063222	0.0050548	--	sp|Q58760|Y1365_METJA Uncharacterized protein MJ1365 OS=Methanocaldococcus jannaschii (strain ATCC 43067 / DSM 2661 / JAL-1 / JCM 10045 / NBRC 100440) GN=MJ1365 PE=4 SV=1//5.91737e-25
CSA006190	5313.88	224.618	4.5642	5.7183e-11	2.7258e-09	--	sp|Q66PF3|UFOG3_FRAAN Putative UDP-glucose flavonoid 3-O-glucosyltransferase 3 OS=Fragaria ananassa GN=GT3 PE=2 SV=1//0
CSA006196	256.24	563.836	-1.1378	0.0022546	0.014231	--	sp|Q93ZB6|DCUP1_ARATH Uroporphyrinogen decarboxylase 1, chloroplastic OS=Arabidopsis thaliana GN=HEME1 PE=2 SV=2//0
CSA006210	8.36422	32.3308	-1.9506	0.0066034	0.033282	--	-//-
CSA006215	817.575	179.405	2.1881	8.4578e-08	2.1751e-06	--	sp|P22195|PER1_ARAHY Cationic peroxidase 1 OS=Arachis hypogaea GN=PNC1 PE=1 SV=2//1.47611e-28
CSA006222	8.1409	42.5749	-2.3867	0.00029339	0.0026549	--	-//-
CSA006223	325.888	12.0237	4.7604	5.8932e-08	1.5654e-06	--	sp|C0LGJ1|Y1743_ARATH Probable LRR receptor-like serine/threonine-protein kinase At1g74360 OS=Arabidopsis thaliana GN=At1g74360 PE=2 SV=1//0
CSA006226	201.266	2097.75	-3.3817	1.0265e-15	1.0412e-13	--	sp|O49607|SBT16_ARATH Subtilisin-like protease SBT1.6 OS=Arabidopsis thaliana GN=SBT1.6 PE=2 SV=1//0
CSA006227	11.5567	66.8771	-2.5328	0.0072297	0.035728	--	sp|Q39134|AAP3_ARATH Amino acid permease 3 OS=Arabidopsis thaliana GN=AAP3 PE=1 SV=2//0
CSA006228	589.905	192.167	1.6181	1.4848e-05	0.00020764	--	sp|P40392|RIC1_ORYSJ Ras-related protein RIC1 OS=Oryza sativa subsp. japonica GN=RIC1 PE=2 SV=2//1.78682e-32
CSA006233	331.665	0.349478	9.8903	2.7225e-08	7.8537e-07	--	sp|P37117|C71A4_SOLME Cytochrome P450 71A4 OS=Solanum melongena GN=CYP71A4 PE=2 SV=1//1.84157e-82
CSA006234	0.669904	10.0098	-3.9013	0.0090445	0.042556	--	-//-
CSA006235	7.062	140.057	-4.3098	1.0584e-12	7.1572e-11	--	sp|Q9SCU0|SDR2A_ARATH Short-chain dehydrogenase reductase 2a OS=Arabidopsis thaliana GN=SDR2a PE=3 SV=1//8.23317e-82
CSA006240	1.28388	22.92	-4.158	0.010641	0.048367	--	sp|O48780|KCS11_ARATH 3-ketoacyl-CoA synthase 11 OS=Arabidopsis thaliana GN=KCS11 PE=2 SV=1//0
CSA006250	945.921	345.545	1.4528	4.2471e-05	0.00051371	--	-//-
CSA006251	358.045	0.705534	8.9872	0.00022988	0.0021623	--	sp|Q9ZDC7|Y404_RICPR Putative glutamine amidotransferase-like protein RP404 OS=Rickettsia prowazekii (strain Madrid E) GN=RP404 PE=3 SV=1//1.62136e-18
CSA006256	6369.79	14665.2	-1.2031	0.001667	0.011146	--	sp|Q9SHI1|IF2C_ARATH Translation initiation factor IF-2, chloroplastic OS=Arabidopsis thaliana GN=At1g17220 PE=2 SV=2//0
CSA006257	1.25614	28.1707	-4.4871	0.0040085	0.022415	--	sp|O81635|ATK4_ARATH Kinesin-4 OS=Arabidopsis thaliana GN=ATK4 PE=1 SV=2//2.39272e-46
CSA006258	1629.47	379.284	2.103	1.0537e-06	2.0318e-05	--	sp|Q9C7S7|ERO1_ARATH Endoplasmic reticulum oxidoreductin-1 OS=Arabidopsis thaliana GN=AERO1 PE=1 SV=1//0
CSA006262	14505.9	4159.89	1.802	3.2082e-07	7.0702e-06	--	sp|Q94AG2|SERK1_ARATH Somatic embryogenesis receptor kinase 1 OS=Arabidopsis thaliana GN=SERK1 PE=1 SV=2//3.22869e-52
CSA006268	3683.84	1549.03	1.2498	0.00039141	0.003392	--	sp|Q6PQJ9|5BPOR_DIGLA 3-oxo-Delta(4,5)-steroid 5-beta-reductase OS=Digitalis lanata PE=1 SV=1//0
CSA006269	550.992	3105.23	-2.4946	1.4271e-11	7.6657e-10	--	sp|O22265|SR43C_ARATH Signal recognition particle 43 kDa protein, chloroplastic OS=Arabidopsis thaliana GN=CAO PE=1 SV=2//4.37874e-121
CSA006284	18.8961	732.036	-5.2758	0.0013237	0.0092882	--	sp|Q9LSE2|ICE1_ARATH Transcription factor ICE1 OS=Arabidopsis thaliana GN=SCRM PE=1 SV=1//9.6354e-101
CSA006285	6098.46	449.646	3.7616	8.2797e-15	7.5393e-13	--	sp|Q9SKK8|ATL22_ARATH RING-H2 finger protein ATL22 OS=Arabidopsis thaliana GN=ATL22 PE=2 SV=2//6.27894e-19
CSA006287	5.91727	578.431	-6.6111	4.4742e-19	7.4202e-17	--	sp|Q8L7W2|NUDT8_ARATH Nudix hydrolase 8 OS=Arabidopsis thaliana GN=NUDT8 PE=2 SV=2//1.28202e-149
CSA006297	54.1229	128.799	-1.2508	0.0052458	0.027752	--	-//-
CSA006299	38.1382	109.967	-1.5278	0.0014136	0.009793	--	sp|Q9LT38|UNCL_ARATH Serine/threonine-protein kinase UCNL OS=Arabidopsis thaliana GN=UCNL PE=2 SV=1//4.99303e-161
CSA006306	587.41	181.072	1.6978	1.7718e-05	0.00024235	--	sp|Q7ZZ25|ATD1A_DANRE ATPase family AAA domain-containing protein 1-A OS=Danio rerio GN=atad1a PE=2 SV=2//7.16502e-72
CSA006307	93.3773	19.8708	2.2324	0.00049931	0.004149	--	-//-
CSA006308	13.1561	501.1	-5.2513	1.5988e-05	0.00022117	--	sp|Q66GR0|FLA17_ARATH Fasciclin-like arabinogalactan protein 17 OS=Arabidopsis thaliana GN=FLA17 PE=2 SV=1//0
CSA006311	361.06	833.241	-1.2065	0.00070524	0.0055295	--	sp|Q75LR7|SAPK1_ORYSJ Serine/threonine-protein kinase SAPK1 OS=Oryza sativa subsp. japonica GN=SAPK1 PE=1 SV=1//0
CSA006317	4.83791	36.0422	-2.8972	9.8431e-05	0.0010569	--	-//-
CSA006319	871.345	3405.89	-1.9667	0.00029758	0.0026884	--	sp|Q8VWZ7|C76B6_CATRO Geraniol 8-hydroxylase OS=Catharanthus roseus GN=CYP76B6 PE=1 SV=1//0
CSA006320	2879.09	1407.97	1.032	0.0028984	0.017377	--	sp|Q70Z17|NAP1C_TOBAC Nucleosome assembly protein 1;3 OS=Nicotiana tabacum GN=NAP1;3 PE=1 SV=1//7.2068e-119
CSA006322	54.2993	252.739	-2.2186	9.0278e-07	1.765e-05	--	sp|O81905|SD18_ARATH Receptor-like serine/threonine-protein kinase SD1-8 OS=Arabidopsis thaliana GN=SD18 PE=1 SV=1//1.5561e-127
CSA006323	68.4144	319.884	-2.2252	2.1684e-06	3.8526e-05	--	sp|O81905|SD18_ARATH Receptor-like serine/threonine-protein kinase SD1-8 OS=Arabidopsis thaliana GN=SD18 PE=1 SV=1//8.53658e-149
CSA006325	1.92604	213.171	-6.7902	0.00012709	0.0013133	--	sp|Q9LFW3|COBL4_ARATH COBRA-like protein 4 OS=Arabidopsis thaliana GN=COBL4 PE=2 SV=2//0
CSA006326	171.301	1084.48	-2.6624	0.0045627	0.024914	--	sp|Q60E70|COBL3_ORYSJ COBRA-like protein 3 OS=Oryza sativa subsp. japonica GN=BC1L4 PE=2 SV=1//3.73365e-123
CSA006327	60.9391	386.511	-2.6651	0.0017699	0.011681	--	sp|Q94KT8|COBRA_ARATH Protein COBRA OS=Arabidopsis thaliana GN=COB PE=2 SV=1//1.34559e-91
CSA006328	23.6499	141.438	-2.5803	0.0006621	0.0052478	--	sp|Q6Z4G7|COBL6_ORYSJ COBRA-like protein 6 OS=Oryza sativa subsp. japonica GN=BC1L7 PE=3 SV=1//2.73706e-10
CSA006333	8.08497	50.9953	-2.6571	2.078e-05	0.00027717	--	-//-
CSA006335	1324.73	629.882	1.0725	0.0022701	0.014303	--	sp|Q8VYJ2|AHL1_ARATH AT-hook motif nuclear-localized protein 1 OS=Arabidopsis thaliana GN=AHL1 PE=1 SV=1//1.88835e-79
CSA006336	1562.83	308.263	2.3419	3.8713e-06	6.4399e-05	--	sp|Q9LNA5|ACR8_ARATH ACT domain-containing protein ACR8 OS=Arabidopsis thaliana GN=ACR8 PE=2 SV=1//0
CSA006337	284.693	114.456	1.3146	0.00070664	0.0055385	--	sp|P34893|CH10_ARATH 10 kDa chaperonin OS=Arabidopsis thaliana GN=CPN10 PE=3 SV=1//5.26141e-36
CSA006338	597.245	157.268	1.9251	0.00082451	0.0062795	--	sp|O19071|MGAT2_PIG Alpha-1,6-mannosyl-glycoprotein 2-beta-N-acetylglucosaminyltransferase OS=Sus scrofa GN=MGAT2 PE=3 SV=1//9.79668e-50
CSA006340	2003.86	4505.54	-1.1689	0.00094669	0.0070415	--	sp|Q43839|G6PDC_SOLTU Glucose-6-phosphate 1-dehydrogenase, chloroplastic OS=Solanum tuberosum PE=1 SV=1//0
CSA006341	30.2375	228.158	-2.9156	0.0030748	0.018216	--	sp|Q94EG9|ZIP11_ARATH Zinc transporter 11 OS=Arabidopsis thaliana GN=ZIP11 PE=2 SV=1//9.63031e-97
CSA006358	32.2929	139.361	-2.1095	0.0052095	0.027626	--	sp|Q9LFP0|APT5_ARATH Adenine phosphoribosyltransferase 5 OS=Arabidopsis thaliana GN=APT5 PE=1 SV=1//5.1728e-107
CSA006367	2.22363	41.7062	-4.2293	1.9588e-05	0.0002641	--	-//-
CSA006368	3.45203	62.7952	-4.1851	0.00018446	0.0017974	--	-//-
CSA006375	2.94007	27.9989	-3.2515	0.005947	0.030614	--	sp|Q9SRE4|UGAL2_ARATH UDP-galactose transporter 2 OS=Arabidopsis thaliana GN=UDP-GALT2 PE=2 SV=1//7.72072e-59
CSA006394	160.739	16.2358	3.3075	0.0016713	0.011167	--	sp|Q9ZPE7|EXO_ARATH Protein EXORDIUM OS=Arabidopsis thaliana GN=EXO PE=2 SV=1//5.52878e-139
CSA006395	10.4304	70.0255	-2.7471	0.00025882	0.0023866	--	-//-
CSA006398	764.922	93.6985	3.0292	2.2579e-14	1.9696e-12	--	sp|Q9LSF1|OXI1_ARATH Serine/threonine-protein kinase OXI1 OS=Arabidopsis thaliana GN=OXI1 PE=1 SV=1//3.69567e-132
CSA006404	2728.35	63.4656	5.4259	3.3492e-38	4.8694e-35	--	sp|P48417|CP74_LINUS Allene oxide synthase, chloroplastic OS=Linum usitatissimum GN=CYP74A PE=1 SV=1//0
CSA006405	41.6626	225.156	-2.4341	1.5858e-05	0.00021979	--	sp|Q9FFW5|PERK8_ARATH Proline-rich receptor-like protein kinase PERK8 OS=Arabidopsis thaliana GN=PERK8 PE=1 SV=1//4.00449e-72
CSA006421	193.049	49.7039	1.9575	0.00043485	0.0037009	--	sp|Q03666|GSTX4_TOBAC Probable glutathione S-transferase OS=Nicotiana tabacum PE=2 SV=1//4.80362e-96
CSA006425	88.0693	295.401	-1.746	1.3615e-05	0.00019325	--	-//-
CSA006429	318.21	21.994	3.8548	0.00011417	0.0011962	--	sp|P83332|TLP1_PRUPE Thaumatin-like protein 1 OS=Prunus persica PE=2 SV=1//1.8267e-75
CSA006430	474.992	6.02335	6.3012	0.00093742	0.0069845	--	sp|O82200|MIOX2_ARATH Inositol oxygenase 2 OS=Arabidopsis thaliana GN=MIOX2 PE=2 SV=2//1.83326e-154
CSA006460	1235.48	578.496	1.0947	0.0019982	0.01288	--	sp|Q9LV48|PERK1_ARATH Proline-rich receptor-like protein kinase PERK1 OS=Arabidopsis thaliana GN=PERK1 PE=2 SV=1//2.25716e-71
CSA006473	824.268	181.995	2.1792	2.5032e-06	4.3715e-05	--	sp|O23530|SNC1_ARATH Protein SUPPRESSOR OF npr1-1, CONSTITUTIVE 1 OS=Arabidopsis thaliana GN=SNC1 PE=1 SV=3//3.0485e-06
CSA006481	1054.83	171.901	2.6174	3.1916e-12	1.9774e-10	--	sp|P92519|M810_ARATH Uncharacterized mitochondrial protein AtMg00810 OS=Arabidopsis thaliana GN=AtMg00810 PE=4 SV=1//1.82392e-08
CSA006494	59.0525	148.123	-1.3267	0.0018753	0.012246	--	sp|Q55909|Y305_SYNY3 TVP38/TMEM64 family membrane protein slr0305 OS=Synechocystis sp. (strain PCC 6803 / Kazusa) GN=slr0305 PE=3 SV=1//1.62327e-11
CSA006496	10.3283	400.161	-5.2759	5.7887e-06	9.2082e-05	--	sp|Q94BT9|ATOX1_ARATH Copper transport protein ATX1 OS=Arabidopsis thaliana GN=ATX1 PE=1 SV=1//6.20779e-10
CSA006504	661.902	1.41107	8.8737	1.8805e-06	3.4058e-05	--	sp|O48723|PLP2_ARATH Patatin-like protein 2 OS=Arabidopsis thaliana GN=PLP2 PE=1 SV=1//2.44929e-172
CSA006509	59.8789	290.265	-2.2772	2.5708e-05	0.00033244	--	-//-
CSA006510	252.395	50.4831	2.3218	0.00050149	0.0041608	--	sp|P09762|WIN2_SOLTU Wound-induced protein WIN2 OS=Solanum tuberosum GN=WIN2 PE=2 SV=1//5.53279e-66
CSA006518	1947.78	949.901	1.036	0.0028612	0.017203	--	sp|Q05046|CH62_CUCMA Chaperonin CPN60-2, mitochondrial OS=Cucurbita maxima GN=CPN60-2 PE=1 SV=1//0
CSA006523	14222.4	3428.29	2.0526	9.1015e-09	2.8977e-07	--	sp|P54774|CDC48_SOYBN Cell division cycle protein 48 homolog OS=Glycine max GN=CDC48 PE=2 SV=1//0
CSA006528	1505.03	3611.9	-1.263	0.0030194	0.01795	--	sp|Q9C9W9|ADO3_ARATH Adagio protein 3 OS=Arabidopsis thaliana GN=ADO3 PE=1 SV=1//0
CSA006529	566.549	103.81	2.4483	2.3826e-10	1.032e-08	--	sp|Q84K00|NAC78_ARATH NAC domain-containing protein 78 OS=Arabidopsis thaliana GN=NAC078 PE=2 SV=2//2.45251e-17
CSA006542	1911.7	4256.65	-1.1549	0.0015045	0.010265	--	sp|P80680|FTRV_MAIZE Ferredoxin-thioredoxin reductase, variable chain OS=Zea mays PE=1 SV=1//1.33276e-29
CSA006544	47.9992	189.897	-1.9841	5.4663e-06	8.7624e-05	--	sp|P30182|TOP2_ARATH DNA topoisomerase 2 OS=Arabidopsis thaliana GN=TOP2 PE=2 SV=2//6.41653e-09
CSA006548	35.1229	333.345	-3.2465	4.1364e-10	1.7036e-08	--	sp|Q39435|RAC1_BETVU Rac-like GTP-binding protein RHO1 OS=Beta vulgaris GN=RHO1 PE=2 SV=1//3.75594e-120
CSA006550	3964.69	1630.13	1.2822	0.00022955	0.0021602	--	sp|O24030|PSA7_SOLLC Proteasome subunit alpha type-7 OS=Solanum lycopersicum GN=PAD1 PE=2 SV=1//7.05362e-154
CSA006555	13.4174	109.181	-3.0245	5.4182e-09	1.8137e-07	--	-//-
CSA006556	277.127	1456.64	-2.394	9.2631e-11	4.2709e-09	--	sp|Q6Z4N3|TRL11_ORYSJ Thioredoxin-like 1-1, chloroplastic OS=Oryza sativa subsp. japonica GN=Os07g0684100 PE=2 SV=1//2.04041e-82
CSA006576	496.599	1936.89	-1.9636	5.5469e-08	1.4834e-06	--	sp|Q8W4J2|MPK16_ARATH Mitogen-activated protein kinase 16 OS=Arabidopsis thaliana GN=MPK16 PE=2 SV=2//0
CSA006582	524.416	15.8962	5.044	2.4477e-18	3.6561e-16	--	-//-
CSA006586	2821.87	1141.78	1.3054	0.00020431	0.0019573	--	sp|Q6VNB8|WDFY3_MOUSE WD repeat and FYVE domain-containing protein 3 OS=Mus musculus GN=Wdfy3 PE=1 SV=1//1.17648e-15
CSA006596	15.6109	0	Inf	0.0094501	0.044023	--	sp|C3VEQ2|ZEP_ONCHC Zeaxanthin epoxidase, chloroplastic OS=Oncidium hybrid cultivar GN=ZEP PE=2 SV=1//5.06322e-11
CSA006619	8.1503	97.729	-3.5839	5.1242e-10	2.0771e-08	--	sp|F4I214|TET10_ARATH Tetraspanin-10 OS=Arabidopsis thaliana GN=TET10 PE=2 SV=1//8.60947e-89
CSA006620	4.60566	84.9037	-4.2043	6.3208e-12	3.6662e-10	--	sp|F4I214|TET10_ARATH Tetraspanin-10 OS=Arabidopsis thaliana GN=TET10 PE=2 SV=1//7.33211e-33
CSA006624	792.5	2723.53	-1.781	0.0015558	0.010544	--	sp|Q8RXE8|BASS3_ARATH Probable sodium/metabolite cotransporter BASS3, chloroplastic OS=Arabidopsis thaliana GN=BASS3 PE=2 SV=1//1.99967e-168
CSA006637	3485.32	1439.05	1.2762	0.00026792	0.0024582	--	sp|Q42342|CYB5E_ARATH Cytochrome b5 isoform E OS=Arabidopsis thaliana GN=CYTB5-E PE=1 SV=2//2.58912e-74
CSA006642	271.727	750.172	-1.4651	7.7757e-05	0.00086276	--	sp|Q56Y42|PLR1_ARATH Pyridoxal reductase, chloroplastic OS=Arabidopsis thaliana GN=PLR1 PE=1 SV=1//0
CSA006661	25.9209	132.175	-2.3503	0.0032601	0.019072	--	sp|A7LXU3|BGH3B_BACO1 Beta-glucosidase BoGH3B OS=Bacteroides ovatus (strain ATCC 8483 / DSM 1896 / JCM 5824 / NCTC 11153) GN=BACOVA_02659 PE=1 SV=1//1.78551e-44
CSA006667	349.7	1031.11	-1.56	2.1166e-05	0.00028146	--	sp|P37830|G6PD_SOLTU Glucose-6-phosphate 1-dehydrogenase, cytoplasmic isoform OS=Solanum tuberosum GN=G6PDH PE=2 SV=1//2.50426e-130
CSA006668	212.977	721.231	-1.7598	2.5916e-06	4.5089e-05	--	sp|Q9FJI5|G6PD6_ARATH Glucose-6-phosphate 1-dehydrogenase, cytoplasmic isoform 2 OS=Arabidopsis thaliana GN=ACG12 PE=2 SV=1//2.20633e-155
CSA006670	1.95378	72.2087	-5.2078	4.1569e-08	1.1482e-06	--	sp|Q6NKZ9|Y4345_ARATH Probable receptor-like serine/threonine-protein kinase At4g34500 OS=Arabidopsis thaliana GN=At4g34500 PE=2 SV=1//1.70443e-134
CSA006671	14.1794	71.0609	-2.3253	1.8049e-05	0.00024609	--	sp|O65902|ACAP1_ARATH Cyclase-associated protein 1 OS=Arabidopsis thaliana GN=CAP1 PE=2 SV=1//0
CSA006674	4090.56	1162.96	1.8145	4.1537e-07	8.9073e-06	--	sp|Q94G86|ALL9_OLEEU Glucan endo-1,3-beta-D-glucosidase OS=Olea europaea GN=OLE9 PE=1 SV=1//0
CSA006682	91.8479	195.96	-1.0932	0.0072555	0.035839	--	-//-
CSA006706	146.194	343.261	-1.2314	0.0014267	0.0098682	--	sp|Q8VZG8|Y4885_ARATH Probable LRR receptor-like serine/threonine-protein kinase At4g08850 OS=Arabidopsis thaliana GN=At4g08850 PE=2 SV=3//6.80742e-90
CSA006710	138.56	582.312	-2.0713	6.218e-06	9.7839e-05	--	-//-
CSA006711	146.406	526.921	-1.8476	7.718e-05	0.00085701	--	-//-
CSA006712	2079.64	222.605	3.2238	7.1753e-05	0.00080595	--	sp|Q9ZW24|GSTU7_ARATH Glutathione S-transferase U7 OS=Arabidopsis thaliana GN=GSTU7 PE=2 SV=1//1.17888e-65
CSA006715	757.024	203.535	1.8951	4.3526e-06	7.1452e-05	--	sp|Q9SGA2|GDPD1_ARATH Glycerophosphodiester phosphodiesterase GDPD1, chloroplastic OS=Arabidopsis thaliana GN=GDPD1 PE=1 SV=1//8.90004e-169
CSA006716	526.27	172.783	1.6068	0.00082162	0.006264	--	-//-
CSA006729	252.941	626.678	-1.3089	0.00038697	0.0033614	--	-//-
CSA006730	2.24243	59.4103	-4.7276	0.001073	0.0078055	--	-//-
CSA006731	20.7224	414.523	-4.3222	2.9893e-06	5.1151e-05	--	sp|Q9FK81|Y5258_ARATH Uncharacterized protein At5g22580 OS=Arabidopsis thaliana GN=At5g22580 PE=1 SV=1//5.38643e-18
CSA006738	175.741	467.236	-1.4107	0.00017659	0.0017336	--	sp|Q9XIE6|ALA3_ARATH Phospholipid-transporting ATPase 3 OS=Arabidopsis thaliana GN=ALA3 PE=1 SV=2//5.29607e-22
CSA006753	0	36.4923	#NAME?	1.2498e-05	0.00017949	--	sp|Q94ID2|IPT5_ARATH Adenylate isopentenyltransferase 5, chloroplastic OS=Arabidopsis thaliana GN=IPT5 PE=1 SV=2//4.75018e-117
CSA006756	0.316384	117.525	-8.5371	7.4094e-23	2.1123e-20	--	sp|Q94CD1|HHT1_ARATH Omega-hydroxypalmitate O-feruloyl transferase OS=Arabidopsis thaliana GN=HHT1 PE=1 SV=1//0
CSA006761	71.3858	19.1672	1.897	0.0010249	0.0075203	--	sp|Q5PNY6|PUB21_ARATH U-box domain-containing protein 21 OS=Arabidopsis thaliana GN=PUB21 PE=2 SV=1//2.21745e-115
CSA006770	902.804	2533.58	-1.4887	0.0017869	0.011775	--	sp|Q941L0|CESA3_ARATH Cellulose synthase A catalytic subunit 3 [UDP-forming] OS=Arabidopsis thaliana GN=CESA3 PE=1 SV=2//0
CSA006771	192.089	605.47	-1.6563	7.2983e-06	0.00011276	--	sp|Q9CAV6|WNK1_ARATH Serine/threonine-protein kinase WNK1 OS=Arabidopsis thaliana GN=WNK1 PE=1 SV=1//0
CSA006772	9.06231	1758.24	-7.6	1.5272e-14	1.3567e-12	--	sp|Q6Q3H3|TPSGD_VITVI (-)-germacrene D synthase OS=Vitis vinifera GN=VIT_19s0014g04930 PE=1 SV=1//0
CSA006785	238.879	97.7981	1.2884	0.0013136	0.009226	--	-//-
CSA006787	756.159	297.026	1.3481	0.00020445	0.0019582	--	sp|Q9SKR2|SYT1_ARATH Synaptotagmin-1 OS=Arabidopsis thaliana GN=SYT1 PE=1 SV=2//8.78443e-13
CSA006804	1834.84	836.725	1.1328	0.0012965	0.0091206	--	sp|Q9M8T9|MCC1_ARATH Histone acetyltransferase MCC1 OS=Arabidopsis thaliana GN=MCC1 PE=2 SV=1//1.25747e-90
CSA006805	28.9625	77.3856	-1.4179	0.003193	0.018759	--	sp|P93654|SYP22_ARATH Syntaxin-22 OS=Arabidopsis thaliana GN=SYP22 PE=1 SV=1//8.14958e-52
CSA006809	611.129	1291.92	-1.08	0.0023095	0.014498	--	sp|Q5XPJ9|SCAR2_ARATH Protein SCAR2 OS=Arabidopsis thaliana GN=SCAR2 PE=1 SV=1//8.92123e-23
CSA006815	7.56456	56.1414	-2.8917	7.8099e-06	0.00011969	--	-//-
CSA006816	17.9103	77.6733	-2.1166	4.2754e-05	0.00051642	--	sp|Q9Z873|HFLX_CHLPN GTPase HflX OS=Chlamydia pneumoniae GN=hflX PE=1 SV=1//8.78788e-18
CSA006824	736.324	1668.9	-1.1805	0.0010386	0.0076008	--	-//-
CSA006826	406.622	1.71974	7.8854	8.5258e-09	2.7303e-07	--	sp|Q9LUQ6|RL192_ARATH 60S ribosomal protein L19-2 OS=Arabidopsis thaliana GN=RPL19B PE=2 SV=1//1.51693e-71
CSA006827	249.642	1084.73	-2.1194	0.00040403	0.0034813	--	sp|P81392|MYB06_ANTMA Myb-related protein 306 OS=Antirrhinum majus GN=MYB306 PE=2 SV=1//5.44529e-120
CSA006829	274.145	1425.77	-2.3787	5.1535e-08	1.391e-06	--	-//-
CSA006839	743.069	4159.87	-2.485	2.4225e-08	7.0488e-07	--	-//-
CSA006840	39.3661	97.1486	-1.3032	0.0047544	0.025735	--	sp|Q4V893|GPAM1_RAT GPALPP motifs-containing protein 1 OS=Rattus norvegicus GN=Gpalpp1 PE=2 SV=1//1.91957e-11
CSA006841	22.3209	163.477	-2.8726	0.00024829	0.0023057	--	sp|P31166|APT1_ARATH Adenine phosphoribosyltransferase 1, chloroplastic OS=Arabidopsis thaliana GN=APT1 PE=1 SV=2//5.69831e-43
CSA006856	340.509	944.438	-1.4718	0.00026217	0.0024151	--	sp|Q8S3D1|BH068_ARATH Transcription factor bHLH68 OS=Arabidopsis thaliana GN=BHLH68 PE=2 SV=2//4.91222e-100
CSA006865	600.833	1319.66	-1.1351	0.0014705	0.010088	--	-//-
CSA006866	3179.18	8626.02	-1.44	3.9628e-05	0.00048307	--	sp|Q9LEB3|RBP47_NICPL Polyadenylate-binding protein RBP47 OS=Nicotiana plumbaginifolia GN=RBP47 PE=1 SV=1//3.09702e-166
CSA006878	1.6374	17.1171	-3.386	0.0012666	0.0089511	--	-//-
CSA006883	53.1036	0.356056	7.2206	2.829e-05	0.00036048	--	sp|Q9ASS4|Y5838_ARATH Probably inactive leucine-rich repeat receptor-like protein kinase At5g48380 OS=Arabidopsis thaliana GN=At5g48380 PE=1 SV=1//1.31395e-159
CSA006891	447.153	6.30571	6.148	9.8878e-08	2.4872e-06	--	sp|O23547|EXLB1_ARATH Expansin-like B1 OS=Arabidopsis thaliana GN=EXLB1 PE=2 SV=2//4.77843e-96
CSA006894	36.9255	90.3182	-1.2904	0.0070529	0.035041	--	sp|O65351|SBT17_ARATH Subtilisin-like protease SBT1.7 OS=Arabidopsis thaliana GN=SBT1.7 PE=1 SV=1//2.64515e-117
CSA006896	61.8257	233.036	-1.9143	4.2869e-06	7.0506e-05	--	sp|Q5VST6|AB17B_HUMAN Alpha/beta hydrolase domain-containing protein 17B OS=Homo sapiens GN=ABHD17B PE=2 SV=1//6.55252e-54
CSA006897	1510.2	531.671	1.5061	0.00018225	0.0017795	--	sp|F4IPM3|CB60E_ARATH Calmodulin-binding protein 60 E OS=Arabidopsis thaliana GN=CBP60E PE=2 SV=1//0
CSA006898	41.373	103.545	-1.3235	0.0036215	0.020708	--	sp|Q94A79|DMS3_ARATH Protein DEFECTIVE IN MERISTEM SILENCING 3 OS=Arabidopsis thaliana GN=DMS3 PE=1 SV=1//3.56079e-35
CSA006900	75.3238	29.3994	1.3573	0.0059247	0.030542	--	sp|Q500U8|TKPR1_ARATH Tetraketide alpha-pyrone reductase 1 OS=Arabidopsis thaliana GN=TKPR1 PE=1 SV=1//1.47942e-82
CSA006904	2359.32	918.16	1.3616	0.00011654	0.0012155	--	sp|Q9C5X3|KEULE_ARATH SNARE-interacting protein KEULE OS=Arabidopsis thaliana GN=KEU PE=1 SV=2//0
CSA006906	1431.41	246.853	2.5357	1.2566e-11	6.8173e-10	--	sp|P46897|ATHB7_ARATH Homeobox-leucine zipper protein ATHB-7 OS=Arabidopsis thaliana GN=ATHB-7 PE=2 SV=2//1.90122e-38
CSA006909	694.578	248.181	1.4847	7.0317e-05	0.00079272	--	-//-
CSA006938	5151.05	833.1	2.6283	1.1005e-07	2.726e-06	--	sp|Q39644|LEA5_CITSI Late embryogenesis abundant protein Lea5 OS=Citrus sinensis GN=LEA5 PE=2 SV=1//1.29479e-17
CSA006950	384.37	137.655	1.4814	0.00068192	0.0053736	--	sp|Q07512|FLS_PETHY Flavonol synthase/flavanone 3-hydroxylase OS=Petunia hybrida GN=FL PE=2 SV=1//0
CSA006962	273.405	13.3551	4.3556	6.3267e-06	9.937e-05	--	-//-
CSA006976	1642.05	748.951	1.1326	0.0016096	0.010836	--	sp|Q8L970|P4H7_ARATH Probable prolyl 4-hydroxylase 7 OS=Arabidopsis thaliana GN=P4H7 PE=2 SV=1//6.31279e-147
CSA006978	49.6174	149.891	-1.595	0.0018716	0.012226	--	sp|Q8VC66|ADIP_MOUSE Afadin- and alpha-actinin-binding protein OS=Mus musculus GN=Ssx2ip PE=1 SV=1//3.07458e-21
CSA006984	174.577	807.315	-2.2093	5.4875e-09	1.8341e-07	--	sp|J9RYI6|DCVR_CUCSA Divinyl chlorophyllide a 8-vinyl-reductase, chloroplastic OS=Cucumis sativus GN=DVR PE=1 SV=1//0
CSA007001	230.449	108.617	1.0852	0.005939	0.030587	--	sp|Q69IL4|RF2A_ORYSJ Transcription factor RF2a OS=Oryza sativa subsp. japonica GN=RF2a PE=1 SV=1//9.55781e-17
CSA007007	340.734	1847.58	-2.4389	0.00023334	0.0021902	--	sp|Q38954|PHT21_ARATH Inorganic phosphate transporter 2-1, chloroplastic OS=Arabidopsis thaliana GN=PHT2-1 PE=1 SV=1//0
CSA007009	109.91	431.546	-1.9732	3.9009e-07	8.423e-06	--	sp|C5DDQ4|AIM32_LACTC Altered inheritance of mitochondria protein 32 OS=Lachancea thermotolerans (strain ATCC 56472 / CBS 6340 / NRRL Y-8284) GN=AIM32 PE=3 SV=1//6.38024e-15
CSA007012	500.185	1092.51	-1.1271	0.0011673	0.0083729	--	sp|F4IHJ0|SFH8_ARATH Phosphatidylinositol/phosphatidylcholine transfer protein SFH8 OS=Arabidopsis thaliana GN=SFH8 PE=2 SV=1//0
CSA007013	58.66	124.286	-1.0832	0.01055	0.048083	--	sp|F4IHJ0|SFH8_ARATH Phosphatidylinositol/phosphatidylcholine transfer protein SFH8 OS=Arabidopsis thaliana GN=SFH8 PE=2 SV=1//3.80259e-26
CSA007021	2317.33	381.646	2.6022	4.6742e-08	1.275e-06	--	sp|Q9SIZ4|Y2027_ARATH Inactive receptor-like serine/threonine-protein kinase At2g40270 OS=Arabidopsis thaliana GN=At2g40270 PE=2 SV=2//7.26601e-139
CSA007030	194.399	77.2435	1.3315	0.001108	0.008016	--	sp|Q9Y7U9|CCA2_SCHPO Putative CCA tRNA nucleotidyltransferase 2 OS=Schizosaccharomyces pombe (strain 972 / ATCC 24843) GN=SPCC645.10 PE=3 SV=1//9.29074e-09
CSA007042	19.0926	133.678	-2.8077	7.6732e-09	2.4939e-07	--	sp|Q8BGF9|S2544_MOUSE Solute carrier family 25 member 44 OS=Mus musculus GN=Slc25a44 PE=2 SV=1//1.16677e-27
CSA007058	9090.29	710.765	3.6769	2.9142e-09	1.0193e-07	--	sp|Q9SQT8|DHQSD_ARATH Bifunctional 3-dehydroquinate dehydratase/shikimate dehydrogenase, chloroplastic OS=Arabidopsis thaliana GN=EMB3004 PE=1 SV=1//4.36713e-50
CSA007059	26.0022	0	Inf	0.0004284	0.0036581	--	sp|P04146|COPIA_DROME Copia protein OS=Drosophila melanogaster GN=GIP PE=1 SV=3//9.52582e-10
CSA007062	493.963	71.8761	2.7808	0.0026781	0.016307	--	sp|Q8VZ80|PLT5_ARATH Polyol transporter 5 OS=Arabidopsis thaliana GN=PLT5 PE=1 SV=2//1.41585e-74
CSA007066	139.069	324.566	-1.2227	0.001986	0.012823	--	sp|Q96MC6|HIAT1_HUMAN Hippocampus abundant transcript 1 protein OS=Homo sapiens GN=HIAT1 PE=2 SV=2//3.44761e-09
CSA007067	46.7539	128.823	-1.4622	0.00098195	0.0072634	--	sp|Q9C9H7|RLP12_ARATH Receptor-like protein 12 OS=Arabidopsis thaliana GN=RLP12 PE=2 SV=2//2.57686e-67
CSA007069	216.144	65.6963	1.7181	0.0035644	0.020464	--	sp|Q9FLR0|NEN1_ARATH Protein NEN1 OS=Arabidopsis thaliana GN=NEN1 PE=2 SV=1//2.96828e-73
CSA007076	58.621	20.4361	1.5203	0.0049769	0.026681	--	-//-
CSA007084	223.395	529.365	-1.2447	0.0010239	0.0075143	--	sp|Q38853|STR15_ARATH Rhodanese-like domain-containing protein 15, chloroplastic OS=Arabidopsis thaliana GN=STR15 PE=2 SV=1//7.27488e-18
CSA007086	50.6517	168.292	-1.7323	7.6244e-05	0.00084813	--	-//-
CSA007088	1630.86	704.25	1.2115	0.00060304	0.0048619	--	sp|Q9M9Y5|GAUT6_ARATH Probable galacturonosyltransferase 6 OS=Arabidopsis thaliana GN=GAUT6 PE=2 SV=1//0
CSA007089	2241.87	25353.5	-3.4994	2.0277e-20	4.2115e-18	--	sp|Q41387|PSBW_SPIOL Photosystem II reaction center W protein, chloroplastic OS=Spinacia oleracea GN=psbW PE=1 SV=1//3.5147e-30
CSA007094	3.47083	44.0841	-3.6669	5.9091e-07	1.214e-05	--	-//-
CSA007095	5.66672	60.4087	-3.4142	0.00084002	0.0063787	--	sp|Q67XC4|TBL40_ARATH Protein trichome birefringence-like 40 OS=Arabidopsis thaliana GN=TBL40 PE=2 SV=2//2.30633e-100
CSA007105	627.108	309.67	1.018	0.0059594	0.030663	--	sp|C0LGH3|Y5614_ARATH Probable LRR receptor-like serine/threonine-protein kinase At1g56140 OS=Arabidopsis thaliana GN=At1g56140 PE=2 SV=2//1.1978e-89
CSA007107	76.2604	247.319	-1.6974	2.9625e-05	0.00037552	--	sp|Q9SGP2|HSL1_ARATH Receptor-like protein kinase HSL1 OS=Arabidopsis thaliana GN=HSL1 PE=2 SV=1//0
CSA007109	169.694	25.4657	2.7363	3.0404e-06	5.1965e-05	--	sp|Q9FGZ4|WRK48_ARATH Probable WRKY transcription factor 48 OS=Arabidopsis thaliana GN=WRKY48 PE=2 SV=1//1.42927e-46
CSA007112	552.155	157.494	1.8098	0.0041315	0.022975	--	sp|Q9LJM4|IKU2_ARATH Receptor-like protein kinase HAIKU2 OS=Arabidopsis thaliana GN=IKU2 PE=1 SV=1//0
CSA007130	78.2541	232.048	-1.5682	8.6918e-05	0.00095015	--	sp|Q9ZT50|RHA2A_ARATH E3 ubiquitin-protein ligase RHA2A OS=Arabidopsis thaliana GN=RHA2A PE=1 SV=1//7.06077e-15
CSA007140	131.022	900.019	-2.7801	4.6216e-13	3.2356e-11	--	sp|B8AJT9|MRS2I_ORYSI Magnesium transporter MRS2-I OS=Oryza sativa subsp. indica GN=MRS2-I PE=3 SV=1//1.56747e-169
CSA007150	90.7922	636.279	-2.809	3.1238e-06	5.3286e-05	--	sp|B9DNJ9|DNAJ_STACT Chaperone protein DnaJ OS=Staphylococcus carnosus (strain TM300) GN=dnaJ PE=3 SV=1//3.61961e-11
CSA007161	66.3415	308.826	-2.2188	0.00094849	0.0070525	--	sp|Q8GW46|YAB5_ARATH Axial regulator YABBY 5 OS=Arabidopsis thaliana GN=YAB5 PE=1 SV=1//2.07427e-76
CSA007166	213.518	101.241	1.0766	0.0068269	0.034174	--	-//-
CSA007182	622.169	1474.12	-1.2445	0.0034293	0.019835	--	sp|C0SVV6|CB60A_ARATH Calmodulin-binding protein 60 A OS=Arabidopsis thaliana GN=CBP60A PE=2 SV=1//1.67837e-154
CSA007183	370.037	1732.58	-2.2272	1.4119e-09	5.2591e-08	--	sp|Q9SUG3|ITPK3_ARATH Inositol-tetrakisphosphate 1-kinase 3 OS=Arabidopsis thaliana GN=ITPK3 PE=1 SV=2//1.18389e-155
CSA007194	107.353	454.997	-2.0835	0.0082823	0.039746	--	sp|P42896|ENO_RICCO Enolase OS=Ricinus communis PE=2 SV=1//0
CSA007205	1091.58	48.6983	4.4864	5.8373e-27	2.5461e-24	--	sp|Q39214|RPM1_ARATH Disease resistance protein RPM1 OS=Arabidopsis thaliana GN=RPM1 PE=1 SV=1//1.79089e-135
CSA007206	1303.04	60.0105	4.4405	5.0956e-27	2.245e-24	--	sp|Q39214|RPM1_ARATH Disease resistance protein RPM1 OS=Arabidopsis thaliana GN=RPM1 PE=1 SV=1//8.03373e-134
CSA007227	576.233	135.366	2.0898	6.4017e-08	1.6849e-06	--	sp|Q9LPC6|ARK2_ARATH Armadillo repeat-containing kinesin-like protein 2 OS=Arabidopsis thaliana GN=ARK2 PE=1 SV=2//0
CSA007231	54.5207	190.384	-1.804	2.2941e-05	0.00030139	--	sp|Q1LUI2|HDDC2_DANRE HD domain-containing protein 2 OS=Danio rerio GN=hddc2 PE=2 SV=1//2.07585e-21
CSA007248	332.105	82.2756	2.0131	1.7759e-05	0.00024274	--	sp|O22900|WRK23_ARATH Probable WRKY transcription factor 23 OS=Arabidopsis thaliana GN=WRKY23 PE=2 SV=1//4.30834e-45
CSA007249	2535.25	127.972	4.3082	3.5482e-27	1.5955e-24	--	-//-
CSA007272	10.6903	60.2673	-2.4951	1.9655e-05	0.00026468	--	-//-
CSA007276	47.8418	208.507	-2.1237	4.4117e-06	7.2341e-05	--	-//-
CSA007277	2.87474	71.7749	-4.642	1.0268e-07	2.5665e-06	--	sp|Q944R1|PLY15_ARATH Probable pectate lyase 15 OS=Arabidopsis thaliana GN=At4g13710 PE=2 SV=1//4.9752e-106
CSA007278	0.316384	9.51484	-4.9104	0.0044152	0.024236	--	sp|Q93Z04|PLY13_ARATH Probable pectate lyase 13 OS=Arabidopsis thaliana GN=PMR6 PE=1 SV=1//9.44434e-25
CSA007279	135.138	338.26	-1.3237	0.0081925	0.039402	--	sp|A7PW81|PGIP_VITVI Polygalacturonase inhibitor OS=Vitis vinifera GN=pgip PE=1 SV=1//4.08611e-160
CSA007280	6.14104	127.402	-4.3748	6.0693e-06	9.588e-05	--	sp|C0LGS3|Y4372_ARATH Probable LRR receptor-like serine/threonine-protein kinase At4g37250 OS=Arabidopsis thaliana GN=At4g37250 PE=2 SV=1//0
CSA007281	1046.4	509.007	1.0397	0.0031493	0.01857	--	sp|Q10058|YAM3_SCHPO Putative oxidoreductase C1F5.03c OS=Schizosaccharomyces pombe (strain 972 / ATCC 24843) GN=SPAC1F5.03c PE=3 SV=1//1.76564e-39
CSA007289	696.973	1870.3	-1.4241	0.0096311	0.044684	--	sp|Q9SAA9|CP511_ARATH Sterol 14-demethylase OS=Arabidopsis thaliana GN=CYP51G1 PE=1 SV=1//0
CSA007293	2.48408	94.8556	-5.2549	4.625e-08	1.264e-06	--	sp|Q9FZJ1|IRX10_ARATH Probable beta-1,4-xylosyltransferase IRX10 OS=Arabidopsis thaliana GN=IRX10 PE=2 SV=1//0
CSA007294	2102.18	961.251	1.1289	0.0014739	0.010109	--	sp|P49729|UCRI1_TOBAC Cytochrome b-c1 complex subunit Rieske-1, mitochondrial (Fragment) OS=Nicotiana tabacum PE=2 SV=1//1.52919e-143
CSA007296	854.649	298.879	1.5158	3.4173e-05	0.00042465	--	sp|Q8GWB7|GUX6_ARATH Inositol phosphorylceramide glucuronosyltransferase 1 OS=Arabidopsis thaliana GN=IPUT1 PE=1 SV=1//0
CSA007316	1695.51	586.898	1.5305	1.8521e-05	0.0002512	--	sp|P59228|VATL2_ARATH V-type proton ATPase subunit c2 OS=Arabidopsis thaliana GN=VHA-c2 PE=2 SV=1//3.99405e-10
CSA007317	2.59595	103.814	-5.3216	0.00053898	0.0044244	--	sp|Q8S905|NACK1_ARATH Kinesin-like protein NACK1 OS=Arabidopsis thaliana GN=NACK1 PE=1 SV=1//1.51322e-19
CSA007318	0.316384	19.3384	-5.9336	1.4777e-05	0.0002068	--	sp|Q8LNZ2|NACK2_ARATH Kinesin-like protein NACK2 OS=Arabidopsis thaliana GN=NACK2 PE=1 SV=1//1.00861e-16
CSA007319	5.03349	244.069	-5.5996	1.0421e-05	0.00015402	--	-//-
CSA007320	5.79692	311.157	-5.7462	1.5563e-06	2.8811e-05	--	sp|Q8LNZ2|NACK2_ARATH Kinesin-like protein NACK2 OS=Arabidopsis thaliana GN=NACK2 PE=1 SV=1//5.46097e-77
CSA007321	68.4895	265.02	-1.9521	0.00055297	0.0045217	--	sp|Q7XBQ9|RGA2_SOLBU Disease resistance protein RGA2 OS=Solanum bulbocastanum GN=RGA2 PE=1 SV=1//5.01662e-07
CSA007324	107.883	293.203	-1.4424	0.00359	0.020579	--	sp|P08452|Y1174_SYNP6 Uncharacterized lipoprotein syc1174_c OS=Synechococcus sp. (strain ATCC 27144 / PCC 6301 / SAUG 1402/1) GN=syc1174_c PE=3 SV=2//4.2976e-121
CSA007325	80.7035	382.441	-2.2445	1.8776e-08	5.6131e-07	--	sp|Q38851|MYB6_ARATH Transcription repressor MYB6 OS=Arabidopsis thaliana GN=MYB6 PE=1 SV=1//5.28051e-06
CSA007342	6.78275	397.773	-5.8739	1.8114e-22	4.731e-20	--	sp|Q9SF32|IQD1_ARATH Protein IQ-DOMAIN 1 OS=Arabidopsis thaliana GN=IQD1 PE=1 SV=1//3.90659e-18
CSA007345	163.62	342.071	-1.0639	0.0052818	0.0279	--	sp|Q7X9V3|NSI_ARATH Acetyltransferase NSI OS=Arabidopsis thaliana GN=NSI PE=1 SV=1//9.16819e-103
CSA007346	971.864	283.426	1.7778	0.00028871	0.0026175	--	-//-
CSA007348	66.5188	0.712113	6.5455	1.0511e-09	4.0288e-08	--	sp|Q9URY4|YI01_SCHPO Putative amidase C869.01 OS=Schizosaccharomyces pombe (strain 972 / ATCC 24843) GN=SPAC869.01 PE=3 SV=1//2.05571e-21
CSA007349	515.479	130.07	1.9866	3.8305e-07	8.2834e-06	--	sp|Q9URY4|YI01_SCHPO Putative amidase C869.01 OS=Schizosaccharomyces pombe (strain 972 / ATCC 24843) GN=SPAC869.01 PE=3 SV=1//4.36273e-70
CSA007350	193.403	487.282	-1.3331	0.00034706	0.0030606	--	sp|Q9S9N9|CCR1_ARATH Cinnamoyl-CoA reductase 1 OS=Arabidopsis thaliana GN=CCR1 PE=1 SV=1//4.1737e-65
CSA007352	636.968	1546.5	-1.2797	0.00032602	0.0028985	--	sp|Q9FF99|AAP7_ARATH Probable amino acid permease 7 OS=Arabidopsis thaliana GN=AAP7 PE=2 SV=1//1.08473e-177
CSA007361	30.8703	80.7811	-1.3878	0.0043534	0.023966	--	-//-
CSA007377	79.3876	27.0834	1.5515	0.0018944	0.012349	--	sp|Q5RBR3|CHMP5_PONAB Charged multivesicular body protein 5 OS=Pongo abelii GN=CHMP5 PE=2 SV=1//2.58204e-13
CSA007378	1767.36	597.725	1.564	1.0769e-05	0.00015809	--	sp|Q4QQV8|CHMP5_RAT Charged multivesicular body protein 5 OS=Rattus norvegicus GN=Chmp5 PE=2 SV=1//2.91242e-48
CSA007389	69.9915	174.863	-1.321	0.0012821	0.0090353	--	sp|Q9C585|UBP8_ARATH Ubiquitin carboxyl-terminal hydrolase 8 OS=Arabidopsis thaliana GN=UBP8 PE=2 SV=2//1.41918e-171
CSA007394	174.051	519.925	-1.5788	0.0034882	0.020117	--	sp|F8WKW8|UGT9_GARJA Beta-D-glucosyl crocetin beta-1,6-glucosyltransferase OS=Gardenia jasminoides GN=UGT94E5 PE=1 SV=1//1.0636e-168
CSA007398	109.398	272.502	-1.3167	0.0096532	0.04477	--	sp|Q9SZN7|HIP26_ARATH Heavy metal-associated isoprenylated plant protein 26 OS=Arabidopsis thaliana GN=HIPP26 PE=1 SV=1//1.48502e-27
CSA007400	40.1837	156.507	-1.9615	1.0849e-05	0.00015907	--	sp|P0C2F6|RNHX1_ARATH Putative ribonuclease H protein At1g65750 OS=Arabidopsis thaliana GN=At1g65750 PE=3 SV=1//4.54026e-12
CSA007402	53.3406	156.194	-1.55	0.00035456	0.0031179	--	sp|Q9SCY3|PNSL4_ARATH Photosynthetic NDH subunit of lumenal location 4, chloroplastic OS=Arabidopsis thaliana GN=PNSL4 PE=1 SV=1//1.66622e-31
CSA007407	511.649	1076.46	-1.0731	0.0024626	0.015251	--	-//-
CSA007417	703.879	297.303	1.2434	0.00060959	0.0049065	--	sp|Q54FR4|PX24D_DICDI PXMP2/4 family protein 4 OS=Dictyostelium discoideum GN=DDB_G0290631 PE=3 SV=1//5.51268e-25
CSA007422	786.568	2045.11	-1.3785	0.00011278	0.0011856	--	sp|Q944I4|GLYK_ARATH D-glycerate 3-kinase, chloroplastic OS=Arabidopsis thaliana GN=GLYK PE=1 SV=2//0
CSA007423	88.4537	273.752	-1.6299	5.658e-05	0.0006567	--	-//-
CSA007428	70.777	277.216	-1.9697	1.3742e-06	2.5779e-05	--	-//-
CSA007429	201.129	633.539	-1.6553	0.0010732	0.0078055	--	sp|Q9FMK7|BT1_ARATH BTB/POZ and TAZ domain-containing protein 1 OS=Arabidopsis thaliana GN=BT1 PE=1 SV=1//2.17911e-127
CSA007430	119.135	331.532	-1.4765	0.00030725	0.0027575	--	-//-
CSA007434	1220.84	295.04	2.0489	2.3609e-08	6.8925e-07	--	sp|O22193|PUB4_ARATH U-box domain-containing protein 4 OS=Arabidopsis thaliana GN=PUB4 PE=1 SV=3//4.4114e-33
CSA007441	26.0874	6.33336	2.0423	0.0078834	0.03824	--	-//-
CSA007449	1093.47	2469.53	-1.1753	0.00069601	0.005466	--	-//-
CSA007453	1702.46	636.743	1.4188	6.3664e-05	0.00072921	--	sp|Q52995|ECHH_RHIME Probable enoyl-CoA hydratase OS=Rhizobium meliloti (strain 1021) GN=fadB1 PE=3 SV=2//7.2526e-20
CSA007462	0	29.9602	#NAME?	7.9944e-05	0.00088299	--	sp|Q8S3F1|BH020_ARATH Transcription factor NAI1 OS=Arabidopsis thaliana GN=NAI1 PE=2 SV=1//6.96139e-34
CSA007478	71.3601	188.161	-1.3988	0.00063798	0.0050918	--	-//-
CSA007499	12.3738	171.107	-3.7895	0.0044561	0.024414	--	sp|C0LGV0|Y5487_ARATH Probable LRR receptor-like serine/threonine-protein kinase At5g48740 OS=Arabidopsis thaliana GN=At5g48740 PE=2 SV=1//0
CSA007510	0	7.90437	#NAME?	0.0037836	0.02141	--	sp|Q8L7W5|SMO11_ARATH Methylsterol monooxygenase 1-1 OS=Arabidopsis thaliana GN=SMO1-1 PE=1 SV=1//2.40509e-154
CSA007511	60.4097	261.088	-2.1117	0.00026269	0.0024182	--	-//-
CSA007515	511.163	1470.02	-1.524	0.0024693	0.01528	--	sp|Q9LXU9|IRKI_ARATH IRK-interacting protein OS=Arabidopsis thaliana GN=IRKI PE=1 SV=1//1.76518e-76
CSA007533	1032.41	211.49	2.2874	9.8088e-10	3.7861e-08	--	sp|Q8S8T4|UXS4_ARATH UDP-glucuronic acid decarboxylase 4 OS=Arabidopsis thaliana GN=UXS4 PE=2 SV=1//2.8114e-53
CSA007540	41.2607	6.92501	2.5749	0.00011454	0.001199	--	-//-
CSA007542	41.419	8.59736	2.2683	0.003378	0.019596	--	sp|B0X1Q4|RUMI_CULQU O-glucosyltransferase rumi homolog OS=Culex quinquefasciatus GN=CPIJ013394 PE=3 SV=1//2.56083e-08
CSA007543	2391.54	1123.86	1.0895	0.001869	0.012216	--	sp|P54774|CDC48_SOYBN Cell division cycle protein 48 homolog OS=Glycine max GN=CDC48 PE=2 SV=1//1.15763e-36
CSA007547	210.408	1.89941	6.7915	5.3513e-08	1.4372e-06	--	sp|Q5I0E9|S47A1_RAT Multidrug and toxin extrusion protein 1 OS=Rattus norvegicus GN=Slc47a1 PE=1 SV=1//2.07144e-51
CSA007567	3144.84	27.7764	6.823	2.5376e-21	5.9189e-19	--	sp|Q07185|AOX1_SOYBN Ubiquinol oxidase 1, mitochondrial OS=Glycine max GN=AOX1 PE=1 SV=1//9.76355e-137
CSA007569	23.5953	101.074	-2.0988	2.0654e-05	0.00027566	--	sp|Q9F234|AGL2_BACTQ Alpha-glucosidase 2 OS=Bacillus thermoamyloliquefaciens PE=3 SV=1//3.3101e-06
CSA007579	96.7633	18.0101	2.4257	0.010111	0.046475	--	-//-
CSA007583	501.245	239.138	1.0677	0.0026052	0.015951	--	sp|Q5R3I4|TTC38_HUMAN Tetratricopeptide repeat protein 38 OS=Homo sapiens GN=TTC38 PE=1 SV=1//9.6647e-20
CSA007608	779.069	239.232	1.7033	4.1813e-06	6.9056e-05	--	sp|Q54P70|Y4757_DICDI OTU domain-containing protein DDB_G0284757 OS=Dictyostelium discoideum GN=DDB_G0284757 PE=3 SV=2//1.00711e-18
CSA007610	306.209	95.5262	1.6805	2.3462e-05	0.00030749	--	-//-
CSA007613	1256.71	165.798	2.9221	6.8375e-06	0.00010663	--	-//-
CSA007615	86.0876	0.356056	7.9176	2.0692e-18	3.1122e-16	--	sp|Q6WNQ8|C81E8_MEDTR Cytochrome P450 81E8 OS=Medicago truncatula GN=CYP81E8 PE=2 SV=1//0
CSA007621	1908.85	789.769	1.2732	0.00029071	0.0026335	--	sp|Q9SJF1|LSG12_ARATH GTPase LSG1-2 OS=Arabidopsis thaliana GN=LSG1-2 PE=1 SV=1//0
CSA007632	32.8232	8.61843	1.9292	0.0040628	0.022652	--	sp|Q9FLS0|FB253_ARATH F-box protein At5g07610 OS=Arabidopsis thaliana GN=At5g07610 PE=2 SV=1//1.74314e-40
CSA007644	0	13.6796	#NAME?	7.3106e-05	0.00081928	--	sp|Q9C9N3|C3H14_ARATH Zinc finger CCCH domain-containing protein 14 OS=Arabidopsis thaliana GN=At1g66810 PE=2 SV=1//8.1133e-50
CSA007646	137.298	385.011	-1.4876	8.4968e-05	0.00093219	--	sp|Q39033|PLCD2_ARATH Phosphoinositide phospholipase C 2 OS=Arabidopsis thaliana GN=PLC2 PE=1 SV=1//0
CSA007647	1254.15	114.029	3.4592	1.1611e-18	1.8151e-16	--	sp|Q944C1|PLCD4_ARATH Phosphoinositide phospholipase C 4 OS=Arabidopsis thaliana GN=PLC4 PE=2 SV=2//0
CSA007648	294.375	8.63159	5.0919	1.6525e-08	5.0018e-07	--	sp|F8WKW1|UGT2_GARJA 7-deoxyloganetin glucosyltransferase OS=Gardenia jasminoides GN=UGT85A24 PE=1 SV=1//0
CSA007654	55.3941	164.423	-1.5696	0.0012139	0.008639	--	-//-
CSA007655	18.795	251.892	-3.7444	3.8485e-14	3.2343e-12	--	-//-
CSA007656	1938.47	820.115	1.241	0.00033549	0.0029742	--	sp|P56331|IF1A_ONOVI Eukaryotic translation initiation factor 1A OS=Onobrychis viciifolia PE=2 SV=2//5.27357e-62
CSA007658	2246.36	14116.4	-2.6517	2.8106e-13	2.0364e-11	--	sp|O04616|CUT1A_ARATH Protein CURVATURE THYLAKOID 1A, chloroplastic OS=Arabidopsis thaliana GN=CURT1A PE=1 SV=1//2.075e-38
CSA007659	57.5866	701.998	-3.6077	0.00010354	0.001104	--	sp|Q9LFS4|NIK1_ARATH Protein NSP-INTERACTING KINASE 1 OS=Arabidopsis thaliana GN=NIK1 PE=1 SV=1//0
CSA007664	19.0254	2.78791	2.7707	0.0032243	0.018897	--	sp|D7SFH9|GPDL2_ARATH Glycerophosphodiester phosphodiesterase protein kinase domain-containing GDPDL2 OS=Arabidopsis thaliana GN=GDPDL2 PE=1 SV=1//1.62487e-70
CSA007670	73.9729	3.82976	4.2717	3.9433e-11	1.9391e-09	--	sp|Q9FXC7|FB79_ARATH Putative F-box protein At1g67623 OS=Arabidopsis thaliana GN=At1g67623 PE=3 SV=1//6.73381e-11
CSA007675	867.777	150.613	2.5265	0.0070527	0.035041	--	sp|Q9FMS6|CAF1K_ARATH Probable CCR4-associated factor 1 homolog 11 OS=Arabidopsis thaliana GN=CAF1-11 PE=2 SV=1//2.67339e-142
CSA007677	778.178	312.673	1.3154	0.00042267	0.0036162	--	sp|Q9LJG8|ASIL2_ARATH Trihelix transcription factor ASIL2 OS=Arabidopsis thaliana GN=ASIL2 PE=2 SV=1//8.41921e-13
CSA007694	864.747	9.88077	6.4515	4.8015e-07	1.0121e-05	--	-//-
CSA007703	149.992	50.3107	1.5759	0.00034753	0.0030623	--	sp|Q54R62|UCKC_DICDI Uridine-cytidine kinase C OS=Dictyostelium discoideum GN=udkC PE=3 SV=1//3.83058e-132
CSA007715	455.302	4429.11	-3.2821	1.3642e-06	2.5659e-05	--	sp|O65351|SBT17_ARATH Subtilisin-like protease SBT1.7 OS=Arabidopsis thaliana GN=SBT1.7 PE=1 SV=1//0
CSA007721	731.536	257.526	1.5062	0.0005856	0.0047441	--	sp|Q8GYN5|RIN4_ARATH RPM1-interacting protein 4 OS=Arabidopsis thaliana GN=RIN4 PE=1 SV=1//1.12187e-35
CSA007722	1348.69	3936.04	-1.5452	0.00017519	0.0017213	--	sp|P38494|RS1H_BACSU 30S ribosomal protein S1 homolog OS=Bacillus subtilis (strain 168) GN=ypfD PE=1 SV=1//1.06683e-07
CSA007723	89.253	219.369	-1.2974	0.0016301	0.010945	--	-//-
CSA007724	1312.52	3393.22	-1.3703	0.00044822	0.0037954	--	sp|B7K735|EFTS_CYAP7 Elongation factor Ts OS=Cyanothece sp. (strain PCC 7424) GN=tsf PE=3 SV=1//1.00031e-85
CSA007726	261.392	46.4475	2.4925	3.0948e-09	1.0773e-07	--	sp|O81098|RPB5A_ARATH DNA-directed RNA polymerases II and IV subunit 5A OS=Arabidopsis thaliana GN=NRPB5A PE=1 SV=1//3.79979e-67
CSA007727	63.3475	11.251	2.4932	1.2913e-05	0.00018474	--	sp|O81098|RPB5A_ARATH DNA-directed RNA polymerases II and IV subunit 5A OS=Arabidopsis thaliana GN=NRPB5A PE=1 SV=1//1.65128e-17
CSA007728	20.5429	105.949	-2.3667	1.5435e-06	2.8599e-05	--	sp|O22707|ALKR3_ARATH Probable aldo-keto reductase 3 OS=Arabidopsis thaliana GN=At1g60690 PE=3 SV=1//1.72273e-116
CSA007730	8.29889	240.772	-4.8586	0.00091996	0.0068744	--	sp|Q9LY03|IRK_ARATH Probable LRR receptor-like serine/threonine-protein kinase IRK OS=Arabidopsis thaliana GN=IRK PE=1 SV=1//2.04055e-56
CSA007739	6.47577	123.261	-4.2505	5.8834e-08	1.5638e-06	--	sp|Q6Z2G9|TLP5_ORYSJ Tubby-like F-box protein 5 OS=Oryza sativa subsp. japonica GN=TULP5 PE=2 SV=1//6.83734e-133
CSA007748	207.358	52.1608	1.9911	2.642e-06	4.582e-05	--	sp|P0C7Q8|DA1_ARATH Protein DA1 OS=Arabidopsis thaliana GN=DA1 PE=1 SV=1//1.22077e-52
CSA007749	304.021	51.4777	2.5622	8.159e-10	3.1974e-08	--	sp|Q8W4F0|DAR1_ARATH Protein DA1-related 1 OS=Arabidopsis thaliana GN=DAR1 PE=1 SV=3//2.14753e-155
CSA007750	93.4863	257.427	-1.4613	0.00028847	0.0026164	--	sp|Q9SND9|Y3028_ARATH Uncharacterized acetyltransferase At3g50280 OS=Arabidopsis thaliana GN=At3g50280 PE=3 SV=1//1.50455e-99
CSA007757	43.496	13.1814	1.7224	0.0036692	0.020915	--	sp|Q9N0E7|MOCOS_BOVIN Molybdenum cofactor sulfurase OS=Bos taurus GN=MOCOS PE=2 SV=3//1.25729e-08
CSA007759	1285.2	600.329	1.0982	0.0019055	0.01241	--	sp|Q9FML2|HDA6_ARATH Histone deacetylase 6 OS=Arabidopsis thaliana GN=HDA6 PE=1 SV=1//0
CSA007773	537.034	1379.07	-1.3606	0.00044756	0.003792	--	sp|Q941D3|PAP8_ARATH Probable plastid-lipid-associated protein 8, chloroplastic OS=Arabidopsis thaliana GN=PAP8 PE=2 SV=1//4.91662e-86
CSA007774	497.792	207.047	1.2656	0.0008209	0.0062597	--	sp|Q9ZPV5|NOC2L_ARATH Nucleolar complex protein 2 homolog OS=Arabidopsis thaliana GN=At2g18220 PE=3 SV=2//0
CSA007784	1650.45	140.02	3.5592	1.1932e-07	2.9322e-06	--	sp|Q9SJA7|SOX_ARATH Probable sarcosine oxidase OS=Arabidopsis thaliana GN=At2g24580 PE=2 SV=1//2.84696e-180
CSA007793	487.994	227.847	1.0988	0.0029961	0.01785	--	sp|Q24133|DNAJ1_DROME DnaJ protein homolog 1 OS=Drosophila melanogaster GN=DnaJ-1 PE=1 SV=3//5.55359e-10
CSA007796	649.472	207.584	1.6456	1.161e-05	0.00016834	--	sp|Q9SUQ3|Y4374_ARATH Probable inactive receptor kinase At4g23740 OS=Arabidopsis thaliana GN=At4g23740 PE=2 SV=1//0
CSA007798	2560.06	376.605	2.7651	9.7581e-09	3.0887e-07	--	sp|Q9SDQ3|SCL1_ARATH Scarecrow-like protein 1 OS=Arabidopsis thaliana GN=SCL1 PE=2 SV=1//0
CSA007801	426.706	97.2136	2.134	6.1089e-08	1.6178e-06	--	-//-
CSA007803	203.646	55.5088	1.8753	7.8686e-06	0.00012045	--	sp|P34092|MYOB_DICDI Myosin IB heavy chain OS=Dictyostelium discoideum GN=myoB PE=1 SV=2//2.33315e-12
CSA007805	350.137	86.2956	2.0206	4.2629e-07	9.0855e-06	--	-//-
CSA007813	458.262	48.1705	3.25	1.791e-06	3.2576e-05	--	sp|Q9FM19|HIR1_ARATH Hypersensitive-induced response protein 1 OS=Arabidopsis thaliana GN=HIR1 PE=1 SV=1//2.95113e-70
CSA007814	271.826	8.12156	5.0648	3.0161e-10	1.2772e-08	--	sp|Q9FM19|HIR1_ARATH Hypersensitive-induced response protein 1 OS=Arabidopsis thaliana GN=HIR1 PE=1 SV=1//5.10471e-106
CSA007819	26.2007	253.192	-3.2726	0.0033498	0.01947	--	sp|Q8LEB6|Y5185_ARATH Probable receptor-like protein kinase At5g18500 OS=Arabidopsis thaliana GN=At5g18500 PE=2 SV=1//0
CSA007824	20.0883	122.117	-2.6038	0.0013722	0.0095626	--	-//-
CSA007826	20.6351	133.886	-2.6978	1.6243e-08	4.9302e-07	--	sp|Q9FFN4|BGAL6_ARATH Beta-galactosidase 6 OS=Arabidopsis thaliana GN=BGAL6 PE=2 SV=1//0
CSA007827	12.5609	274.332	-4.4489	7.5056e-05	0.00083727	--	sp|Q9FN08|BGA10_ARATH Beta-galactosidase 10 OS=Arabidopsis thaliana GN=BGAL10 PE=2 SV=1//9.74046e-116
CSA007828	5.36867	100.551	-4.2272	3.3146e-05	0.00041425	--	sp|Q5N8X6|BGAL3_ORYSJ Beta-galactosidase 3 OS=Oryza sativa subsp. japonica GN=Os01g0875500 PE=3 SV=1//2.95387e-47
CSA007829	2.80986	49.7889	-4.1473	6.4894e-05	0.00074096	--	sp|Q9FN08|BGA10_ARATH Beta-galactosidase 10 OS=Arabidopsis thaliana GN=BGAL10 PE=2 SV=1//9.87147e-51
CSA007831	10.6442	170.928	-4.0052	0.00039253	0.0034011	--	sp|Q9FN08|BGA10_ARATH Beta-galactosidase 10 OS=Arabidopsis thaliana GN=BGAL10 PE=2 SV=1//1.55077e-60
CSA007832	17.4354	237.643	-3.7687	0.00032543	0.0028945	--	sp|Q5N8X6|BGAL3_ORYSJ Beta-galactosidase 3 OS=Oryza sativa subsp. japonica GN=Os01g0875500 PE=3 SV=1//1.23674e-40
CSA007835	511.963	1933.49	-1.9171	1.232e-07	3.0155e-06	--	sp|Q38967|AAP2_ARATH Amino acid permease 2 OS=Arabidopsis thaliana GN=AAP2 PE=1 SV=1//0
CSA007838	392.951	838.812	-1.094	0.0025635	0.015746	--	sp|Q9ZU95|NUD17_ARATH Nudix hydrolase 17, mitochondrial OS=Arabidopsis thaliana GN=NUDT17 PE=2 SV=1//2.01943e-67
CSA007840	3441.31	651.782	2.4005	3.3976e-11	1.6917e-09	--	-//-
CSA007842	740.891	194.967	1.926	2.668e-07	5.9923e-06	--	sp|Q03662|GSTX1_TOBAC Probable glutathione S-transferase OS=Nicotiana tabacum PE=2 SV=1//9.97034e-72
CSA007844	187.035	4.76893	5.2935	6.7645e-13	4.6391e-11	--	sp|Q03662|GSTX1_TOBAC Probable glutathione S-transferase OS=Nicotiana tabacum PE=2 SV=1//8.4929e-79
CSA007845	216.921	74.9333	1.5335	0.00015637	0.0015697	--	sp|Q41144|STC_RICCO Sugar carrier protein C OS=Ricinus communis GN=STC PE=2 SV=1//0
CSA007873	206.035	1155.71	-2.4878	2.8668e-05	0.00036488	--	sp|Q5M755|PAP7_ARATH Probable plastid-lipid-associated protein 7, chloroplastic OS=Arabidopsis thaliana GN=PAP7 PE=2 SV=1//1.89593e-12
CSA007877	509.533	53.2677	3.2578	3.6469e-12	2.2372e-10	--	sp|Q9SX78|CXE2_ARATH Probable carboxylesterase 2 OS=Arabidopsis thaliana GN=CXE2 PE=2 SV=1//2.86565e-131
CSA007884	945.239	2493.27	-1.3993	6.8073e-05	0.00077201	--	sp|Q0DS59|C14B2_ORYSJ Cytochrome P450 714B2 OS=Oryza sativa subsp. japonica GN=CYP714B2 PE=1 SV=2//5.65669e-21
CSA007886	40.202	447.603	-3.4769	9.027e-06	0.00013586	--	sp|O64864|YLS3_ARATH Protein YLS3 OS=Arabidopsis thaliana GN=YLS3 PE=2 SV=1//1.56086e-44
CSA007891	0.316384	67.3779	-7.7345	8.0891e-09	2.6058e-07	--	sp|Q9FLK4|GSXL8_ARATH Flavin-containing monooxygenase FMO GS-OX-like 8 OS=Arabidopsis thaliana GN=At5g61290 PE=2 SV=1//8.01575e-49
CSA007894	6232.67	556.765	3.4847	1.4517e-09	5.3869e-08	--	sp|Q8GSM7|HST_TOBAC Shikimate O-hydroxycinnamoyltransferase OS=Nicotiana tabacum GN=HST PE=1 SV=1//0
CSA007896	36.7979	230.535	-2.6473	4.9818e-05	0.00058972	--	sp|Q0V7T5|Y1864_ARATH Probable receptor-like protein kinase At1g80640 OS=Arabidopsis thaliana GN=At1g80640 PE=2 SV=1//7.65201e-151
CSA007899	506.588	43.491	3.542	0.0015811	0.010682	--	sp|Q9LTA2|AHL17_ARATH AT-hook motif nuclear-localized protein 17 OS=Arabidopsis thaliana GN=AHL17 PE=2 SV=1//3.31275e-82
CSA007900	185.356	16.1917	3.517	2.1083e-13	1.5559e-11	--	-//-
CSA007911	126.18	808.697	-2.6801	0.0012053	0.0085932	--	sp|O65718|CNGC2_ARATH Cyclic nucleotide-gated ion channel 2 OS=Arabidopsis thaliana GN=CNGC2 PE=1 SV=1//0
CSA007912	15.3232	0	Inf	3.1232e-05	0.00039394	--	sp|Q02200|PERX_NICSY Lignin-forming anionic peroxidase OS=Nicotiana sylvestris PE=2 SV=1//6.38344e-154
CSA007915	602.892	56.0227	3.4278	4.8937e-12	2.916e-10	--	sp|Q93Z27|CML45_ARATH Probable calcium-binding protein CML45 OS=Arabidopsis thaliana GN=CML45 PE=1 SV=1//4.75448e-44
CSA007916	51.1716	154.191	-1.5913	0.00053061	0.0043683	--	sp|Q43847|SSY2_SOLTU Granule-bound starch synthase 2, chloroplastic/amyloplastic OS=Solanum tuberosum GN=SS2 PE=1 SV=3//0
CSA007918	0	32.933	#NAME?	7.9707e-10	3.1321e-08	--	-//-
CSA007919	2645.24	83.4768	4.9859	8.6303e-19	1.3688e-16	--	sp|Q9LSE1|CDG1_ARATH Serine/threonine-protein kinase CDG1 OS=Arabidopsis thaliana GN=CDG1 PE=1 SV=1//1.42379e-33
CSA007920	3840.2	1697.21	1.178	0.00073018	0.0056831	--	sp|P55034|PSMD4_ARATH 26S proteasome non-ATPase regulatory subunit 4 homolog OS=Arabidopsis thaliana GN=RPN10 PE=1 SV=1//6.84825e-128
CSA007922	113.613	683.932	-2.5897	3.1036e-11	1.5578e-09	--	sp|Q8H0W0|LPA3_ARATH Protein LOW PSII ACCUMULATION 3, chloroplastic OS=Arabidopsis thaliana GN=LPA3 PE=1 SV=1//2.8879e-06
CSA007927	196.738	13.1017	3.9084	0.0024071	0.014979	--	-//-
CSA007929	102.248	33.1798	1.6237	0.00068963	0.0054246	--	sp|Q9P7W0|OPA3_SCHPO OPA3-like protein OS=Schizosaccharomyces pombe (strain 972 / ATCC 24843) GN=SPBC1703.11 PE=3 SV=1//1.25512e-10
CSA007944	282.682	118.857	1.25	0.001295	0.0091132	--	sp|Q8K3A0|HSC20_MOUSE Iron-sulfur cluster co-chaperone protein HscB, mitochondrial OS=Mus musculus GN=Hscb PE=2 SV=2//3.65739e-22
CSA007946	2581.2	114.23	4.498	5.7063e-21	1.257e-18	--	sp|Q38870|CDPK2_ARATH Calcium-dependent protein kinase 2 OS=Arabidopsis thaliana GN=CPK2 PE=1 SV=1//0
CSA007947	20.824	81.2944	-1.9649	0.00011884	0.0012363	--	sp|Q94JL3|BH112_ARATH Transcription factor bHLH112 OS=Arabidopsis thaliana GN=BHLH112 PE=2 SV=1//1.09914e-55
CSA007948	4.18726	106.12	-4.6636	1.2056e-14	1.091e-12	--	sp|Q6NQE2|FQRL1_ARATH Probable NAD(P)H dehydrogenase (quinone) FQR1-like 1 OS=Arabidopsis thaliana GN=At4g27270 PE=2 SV=1//3.64752e-116
CSA007950	864.302	146.167	2.5639	1.8565e-09	6.759e-08	--	sp|Q54DY9|BCS1B_DICDI Probable mitochondrial chaperone BCS1-B OS=Dictyostelium discoideum GN=bcsl1b PE=3 SV=1//4.03879e-19
CSA007961	2216.02	12448.1	-2.4899	9.6398e-12	5.3223e-10	--	sp|Q9ZS34|CHLP_TOBAC Geranylgeranyl diphosphate reductase, chloroplastic OS=Nicotiana tabacum GN=CHLP PE=2 SV=1//0
CSA007965	294.611	596.305	-1.0172	0.0060614	0.031089	--	sp|Q8LD49|TRXX_ARATH Thioredoxin X, chloroplastic OS=Arabidopsis thaliana GN=ATHX PE=2 SV=2//1.83969e-27
CSA007966	2133.33	990.085	1.1075	0.0015363	0.010436	--	sp|P0CH30|RING1_GOSHI E3 ubiquitin-protein ligase RING1 OS=Gossypium hirsutum GN=RING1 PE=1 SV=1//1.06829e-93
CSA007969	281.315	112.987	1.316	0.00096964	0.0071877	--	sp|O04200|PXN_ARATH Peroxisomal nicotinamide adenine dinucleotide carrier OS=Arabidopsis thaliana GN=PXN PE=1 SV=1//2.09323e-49
CSA007970	563.753	237.616	1.2464	0.00091639	0.0068512	--	sp|O04200|PXN_ARATH Peroxisomal nicotinamide adenine dinucleotide carrier OS=Arabidopsis thaliana GN=PXN PE=1 SV=1//5.63781e-101
CSA007979	569.404	244.799	1.2179	0.0012059	0.0085941	--	sp|P10290|MYBC_MAIZE Anthocyanin regulatory C1 protein OS=Zea mays GN=C1 PE=2 SV=1//4.38007e-63
CSA007982	185.409	462.083	-1.3174	0.00038748	0.0033646	--	-//-
CSA007988	33.3341	5.74562	2.5365	0.0017323	0.011476	--	sp|Q9SK27|ENL1_ARATH Early nodulin-like protein 1 OS=Arabidopsis thaliana GN=At2g25060 PE=1 SV=2//1.60873e-18
CSA007990	56.8269	13.9948	2.0217	0.00051219	0.0042367	--	sp|P46417|GSTX3_SOYBN Glutathione S-transferase 3 OS=Glycine max GN=GST3 PE=1 SV=1//2.23744e-48
CSA007992	144.553	49.4071	1.5488	0.00047539	0.0039891	--	sp|Q03666|GSTX4_TOBAC Probable glutathione S-transferase OS=Nicotiana tabacum PE=2 SV=1//8.75007e-98
CSA007995	501.984	249.477	1.0087	0.006824	0.034169	--	sp|P35402|ERD2A_ARATH ER lumen protein-retaining receptor A OS=Arabidopsis thaliana GN=ERD2A PE=2 SV=1//1.12847e-111
CSA008000	57.2064	12.3244	2.2147	0.00021271	0.0020244	--	sp|D7SFH9|GPDL2_ARATH Glycerophosphodiester phosphodiesterase protein kinase domain-containing GDPDL2 OS=Arabidopsis thaliana GN=GDPDL2 PE=1 SV=1//3.51521e-88
CSA008016	32.1833	328.62	-3.352	0.0038648	0.021774	--	sp|Q9ASR0|TBB3_ARATH Tubulin beta-3 chain OS=Arabidopsis thaliana GN=TUBB3 PE=2 SV=2//0
CSA008017	4.13133	104.941	-4.6668	2.7398e-06	4.737e-05	--	-//-
CSA008019	432.182	1746.82	-2.015	3.189e-08	9.0264e-07	--	-//-
CSA008021	406.19	1610.25	-1.9871	5.6583e-08	1.5104e-06	--	sp|Q8L3W1|VRN1_ARATH B3 domain-containing transcription factor VRN1 OS=Arabidopsis thaliana GN=VRN1 PE=1 SV=1//3.6894e-12
CSA008024	156.531	451.34	-1.5278	6.3946e-05	0.00073168	--	sp|Q9ZPH9|PMTF_ARATH Probable methyltransferase PMT15 OS=Arabidopsis thaliana GN=At4g00750 PE=2 SV=1//0
CSA008033	1.56312	24.0323	-3.9425	4.6616e-05	0.00055736	--	sp|F4IDQ5|JASON_ARATH Protein JASON OS=Arabidopsis thaliana GN=JASON PE=2 SV=1//1.46774e-09
CSA008043	323.593	75.0676	2.1079	2.1177e-05	0.00028152	--	sp|Q9CA93|BAC2_ARATH Mitochondrial arginine transporter BAC2 OS=Arabidopsis thaliana GN=BAC2 PE=1 SV=1//3.20786e-110
CSA008045	57.0419	192.592	-1.7555	0.0026784	0.016307	--	sp|Q9H091|ZMY15_HUMAN Zinc finger MYND domain-containing protein 15 OS=Homo sapiens GN=ZMYND15 PE=2 SV=2//2.70917e-24
CSA008048	422.529	13.6927	4.9476	5.6702e-26	2.2281e-23	--	sp|B9DFU2|MAX1_ARATH Cytochrome P450 711A1 OS=Arabidopsis thaliana GN=CYP711A1 PE=2 SV=1//4.37501e-176
CSA008051	1123.39	2251.85	-1.0032	0.0043072	0.023769	--	-//-
CSA008054	30.2733	3.83634	2.9802	0.00014245	0.001447	--	-//-
CSA008070	94.3356	0	Inf	7.8335e-09	2.5328e-07	--	sp|Q9CAC1|GUN8_ARATH Endoglucanase 8 OS=Arabidopsis thaliana GN=CEL1 PE=2 SV=1//2.79598e-73
CSA008104	1984.6	264.758	2.9061	7.215e-15	6.6252e-13	--	sp|Q9LS40|ASPG1_ARATH Protein ASPARTIC PROTEASE IN GUARD CELL 1 OS=Arabidopsis thaliana GN=ASPG1 PE=1 SV=1//2.83158e-56
CSA008119	655.941	261.485	1.3268	0.00030342	0.0027298	--	sp|Q9ZU93|PUX2_ARATH Plant UBX domain-containing protein 2 OS=Arabidopsis thaliana GN=PUX2 PE=1 SV=2//3.42832e-76
CSA008123	534.784	8.10573	6.0439	2.9898e-07	6.6466e-06	--	sp|Q9SRE6|CML38_ARATH Calcium-binding protein CML38 OS=Arabidopsis thaliana GN=CML38 PE=2 SV=1//6.16396e-36
CSA008125	6.37376	205.963	-5.0141	2.9331e-21	6.698e-19	--	sp|Q8LFN2|Y3037_ARATH Probable inactive leucine-rich repeat receptor-like protein kinase At3g03770 OS=Arabidopsis thaliana GN=At3g03770 PE=2 SV=1//4.18498e-51
CSA008127	8.45733	202.034	-4.5783	6.4843e-19	1.0436e-16	--	sp|Q8LFN2|Y3037_ARATH Probable inactive leucine-rich repeat receptor-like protein kinase At3g03770 OS=Arabidopsis thaliana GN=At3g03770 PE=2 SV=1//2.12188e-80
CSA008136	11.4989	41.9069	-1.8657	0.0026957	0.016396	--	sp|Q40784|AAPC_CENCI Putative glucose-6-phosphate 1-epimerase OS=Cenchrus ciliaris PE=2 SV=1//3.01289e-43
CSA008143	3.00494	55.9314	-4.2182	0.0049952	0.026756	--	sp|Q9FWX2|NAC7_ARATH NAC domain-containing protein 7 OS=Arabidopsis thaliana GN=NAC007 PE=1 SV=2//9.64475e-113
CSA008160	951.652	155.05	2.6177	4.1648e-12	2.5265e-10	--	sp|P0C8Z0|Y8359_ORYSI Uncharacterized protein OsI_027940 OS=Oryza sativa subsp. indica GN=OsI_027940 PE=1 SV=2//3.88338e-44
CSA008163	726.992	1798.66	-1.3069	0.00017989	0.00176	--	sp|Q9ZUV3|IRX7_ARATH Probable glucuronoxylan glucuronosyltransferase IRX7 OS=Arabidopsis thaliana GN=IRX7 PE=2 SV=1//0
CSA008164	203.611	2133.81	-3.3895	4.8559e-08	1.3208e-06	--	sp|F4I9E1|NFD4_ARATH Protein NUCLEAR FUSION DEFECTIVE 4 OS=Arabidopsis thaliana GN=NFD4 PE=3 SV=1//4.83316e-28
CSA008169	252.404	31.7785	2.9896	3.4289e-10	1.4367e-08	--	sp|P31531|1A1C_SOYBN 1-aminocyclopropane-1-carboxylate synthase OS=Glycine max GN=ACS1 PE=2 SV=1//0
CSA008171	959.7	2788.63	-1.5389	3.2348e-05	0.00040568	--	sp|Q8GYY5|RGAP3_ARATH Rho GTPase-activating protein 3 OS=Arabidopsis thaliana GN=ROPGAP3 PE=2 SV=1//2.58746e-138
CSA008176	31.5491	104.88	-1.7331	0.00072118	0.0056231	--	sp|Q39613|CYPH_CATRO Peptidyl-prolyl cis-trans isomerase OS=Catharanthus roseus GN=PCKR1 PE=1 SV=1//1.66319e-101
CSA008187	58.902	136.752	-1.2152	0.0044382	0.024338	--	-//-
CSA008191	103.241	6.81184	3.9218	0.00047584	0.0039913	--	-//-
CSA008201	1498.39	30.8277	5.603	1.4217e-05	0.00020068	--	sp|Q42600|C84A1_ARATH Cytochrome P450 84A1 OS=Arabidopsis thaliana GN=CYP84A1 PE=1 SV=1//0
CSA008205	44.2383	11.4175	1.954	0.0016778	0.011198	--	-//-
CSA008212	154.6	14294	-6.5307	7.4869e-06	0.00011539	--	sp|Q6PWU2|ATESY_VITVI (-)-alpha-terpineol synthase OS=Vitis vinifera PE=1 SV=1//0
CSA008220	250.404	835.974	-1.7392	3.3866e-06	5.7187e-05	--	sp|P48418|C75A1_PETHY Flavonoid 3&apos;,5&apos;-hydroxylase 1 OS=Petunia hybrida GN=CYP75A1 PE=2 SV=1//1.37997e-95
CSA008221	3.18218	245.835	-6.2715	3.8452e-10	1.5927e-08	--	sp|Q9C540|ACFR4_ARATH Probable transmembrane ascorbate ferrireductase 4 OS=Arabidopsis thaliana GN=CYB561D PE=2 SV=1//2.62094e-83
CSA008222	4.46651	190.974	-5.4181	3.4429e-22	8.6802e-20	--	sp|Q9C7G0|MA658_ARATH 65-kDa microtubule-associated protein 8 OS=Arabidopsis thaliana GN=MAP65-8 PE=1 SV=2//2.47661e-162
CSA008223	6.72728	298.217	-5.4702	2.2652e-26	9.2337e-24	--	sp|Q9C7G0|MA658_ARATH 65-kDa microtubule-associated protein 8 OS=Arabidopsis thaliana GN=MAP65-8 PE=1 SV=2//2.51993e-46
CSA008229	242.037	2.961	6.353	1.5596e-06	2.8861e-05	--	sp|Q9LDE1|MY108_ARATH Transcription factor MYB108 OS=Arabidopsis thaliana GN=MYB108 PE=1 SV=1//1.14443e-82
CSA008235	351.259	75.0611	2.2264	5.8975e-08	1.5656e-06	--	-//-
CSA008236	96.0223	24.5173	1.9696	8.206e-05	0.00090429	--	-//-
CSA008241	785.661	293.242	1.4218	0.00011735	0.0012228	--	sp|Q8LFD1|LPP3_ARATH Putative lipid phosphate phosphatase 3, chloroplastic OS=Arabidopsis thaliana GN=LPP3 PE=2 SV=1//3.84425e-132
CSA008248	986.708	120.003	3.0395	2.3486e-05	0.00030768	--	-//-
CSA008254	471.75	1243.38	-1.3982	0.0001089	0.0011518	--	sp|Q66GP0|Y5738_ARATH BTB/POZ domain-containing protein At5g67385 OS=Arabidopsis thaliana GN=At5g67385 PE=1 SV=2//0
CSA008258	15.6764	45.1977	-1.5277	0.010127	0.046518	--	sp|F4JSH1|APY7_ARATH Probable apyrase 7 OS=Arabidopsis thaliana GN=APY7 PE=2 SV=1//0
CSA008270	28.8328	445.485	-3.9496	6.9773e-06	0.0001083	--	sp|Q69SG5|GUN24_ORYSJ Endoglucanase 24 OS=Oryza sativa subsp. japonica GN=Os09g0533900 PE=2 SV=1//4.42e-131
CSA008273	6858.47	2377.16	1.5286	0.0056333	0.029398	--	sp|Q1W2L8|GSH1_TOBAC Glutamate--cysteine ligase, chloroplastic OS=Nicotiana tabacum GN=GSH1 PE=2 SV=2//0
CSA008291	334.85	157.097	1.0919	0.0037361	0.021201	--	sp|Q9CQK7|RWDD1_MOUSE RWD domain-containing protein 1 OS=Mus musculus GN=Rwdd1 PE=1 SV=1//1.2947e-14
CSA008308	16106.5	146.749	6.7781	2.349e-05	0.00030768	--	sp|P51613|CHIB_VITVI Basic endochitinase OS=Vitis vinifera GN=CHIT1B PE=2 SV=1//1.01452e-130
CSA008311	10.3185	65.9767	-2.6767	3.7509e-06	6.2611e-05	--	sp|O64781|Y1639_ARATH G-type lectin S-receptor-like serine/threonine-protein kinase At1g61390 OS=Arabidopsis thaliana GN=At1g61390 PE=2 SV=1//2.53676e-28
CSA008312	733.208	7.09286	6.6917	1.2029e-06	2.2881e-05	--	sp|Q9FKS8|LHT1_ARATH Lysine histidine transporter 1 OS=Arabidopsis thaliana GN=LHT1 PE=1 SV=1//0
CSA008313	1.30267	12.1376	-3.2199	0.0092529	0.0433	--	sp|Q9SGY7|PEK11_ARATH Putative proline-rich receptor-like protein kinase PERK11 OS=Arabidopsis thaliana GN=PERK11 PE=2 SV=2//1.90834e-65
CSA008318	13775.8	3996.82	1.7852	4.3835e-07	9.2993e-06	--	sp|Q9LD45|BI1_ARATH Bax inhibitor 1 OS=Arabidopsis thaliana GN=BI-1 PE=1 SV=1//6.32025e-102
CSA008323	914.632	34.0571	4.7472	1.3273e-16	1.5604e-14	--	sp|Q70II3|EF110_ARATH Ethylene-responsive transcription factor ERF110 OS=Arabidopsis thaliana GN=ERF110 PE=2 SV=2//2.26785e-20
CSA008324	1583.87	285.324	2.4728	1.6558e-11	8.7753e-10	--	sp|Q40392|TMVRN_NICGU TMV resistance protein N OS=Nicotiana glutinosa GN=N PE=1 SV=1//1.99942e-50
CSA008325	443.525	71.6979	2.629	1.2604e-10	5.7089e-09	--	sp|F4JNB7|RPP5_ARATH Disease resistance protein RPP5 OS=Arabidopsis thaliana GN=RPP5 PE=1 SV=1//8.61017e-12
CSA008327	9.64809	83.567	-3.1146	6.3432e-05	0.00072674	--	sp|Q9SE97|FH1_ARATH Formin-like protein 1 OS=Arabidopsis thaliana GN=FH1 PE=1 SV=1//6.00619e-09
CSA008329	2191.01	199.201	3.4593	3.055e-07	6.7743e-06	--	-//-
CSA008340	3651.95	1773.43	1.0421	0.00279	0.016836	--	sp|Q9SII8|DSK2B_ARATH Ubiquitin domain-containing protein DSK2b OS=Arabidopsis thaliana GN=DSK2B PE=1 SV=1//2.98764e-172
CSA008346	49.0748	3.3039	3.8927	6.7277e-05	0.00076437	--	-//-
CSA008347	425.555	42.6026	3.3203	3.2538e-05	0.00040759	--	sp|Q39030|KPK2_ARATH Serine/threonine-protein kinase AtPK2/AtPK19 OS=Arabidopsis thaliana GN=ATPK2 PE=1 SV=2//0
CSA008361	246.65	86.3126	1.5148	0.00016715	0.0016558	--	-//-
CSA008362	3637.86	1221.69	1.5742	7.9666e-06	0.00012167	--	sp|Q5SRX1|TM1L2_MOUSE TOM1-like protein 2 OS=Mus musculus GN=Tom1l2 PE=2 SV=1//2.51908e-27
CSA008366	319.197	148.454	1.1044	0.0037917	0.021442	--	sp|Q9SY57|P2A10_ARATH Protein PHLOEM PROTEIN 2-LIKE A10 OS=Arabidopsis thaliana GN=PP2A10 PE=2 SV=1//2.42738e-138
CSA008367	19719.5	1290.43	3.9337	2.9827e-08	8.5197e-07	--	sp|Q9FS10|PSK_ASPOF Phytosulfokines OS=Asparagus officinalis GN=PSK PE=1 SV=1//4.12969e-09
CSA008374	111.907	229.942	-1.039	0.008671	0.041167	--	-//-
CSA008377	67.4426	149.369	-1.1471	0.006601	0.033275	--	-//-
CSA008391	8.65332	44.5527	-2.3642	0.00020846	0.0019911	--	sp|Q5RC69|DCTD_PONAB Deoxycytidylate deaminase OS=Pongo abelii GN=DCTD PE=2 SV=1//9.79437e-39
CSA008392	259.662	107.904	1.2669	0.0014889	0.010185	--	-//-
CSA008393	617.887	261.386	1.2412	0.00081994	0.0062534	--	sp|P36096|TUL1_YEAST Transmembrane E3 ubiquitin-protein ligase 1 OS=Saccharomyces cerevisiae (strain ATCC 204508 / S288c) GN=TUL1 PE=1 SV=1//4.48521e-32
CSA008394	1326.85	222.579	2.5756	0.00037167	0.0032481	--	sp|Q9FKJ0|FK132_ARATH F-box/kelch-repeat protein At5g60570 OS=Arabidopsis thaliana GN=At5g60570 PE=2 SV=1//0
CSA008396	0	22.0644	#NAME?	0.00033786	0.0029928	--	sp|Q9LHF1|LRX4_ARATH Leucine-rich repeat extensin-like protein 4 OS=Arabidopsis thaliana GN=LRX4 PE=2 SV=1//1.09839e-116
CSA008397	1023.1	110.118	3.2158	5.7524e-07	1.1878e-05	--	sp|O49447|ADT3_ARATH ADP,ATP carrier protein 3, mitochondrial OS=Arabidopsis thaliana GN=AAC3 PE=2 SV=1//0
CSA008401	209.546	433.307	-1.0481	0.0055136	0.028901	--	sp|Q942P9|P2C01_ORYSJ Probable protein phosphatase 2C 1 OS=Oryza sativa subsp. japonica GN=Os01g0164600 PE=2 SV=1//1.45497e-28
CSA008403	1975.86	569.078	1.7958	5.4184e-07	1.1276e-05	--	sp|Q55DY8|MFRN_DICDI Mitoferrin OS=Dictyostelium discoideum GN=mcfF PE=3 SV=1//2.84693e-52
CSA008404	3.96349	49.4947	-3.6424	0.00067143	0.0053054	--	sp|Q9ZRF1|MTDH_FRAAN Probable mannitol dehydrogenase OS=Fragaria ananassa GN=CAD PE=2 SV=1//7.6711e-128
CSA008408	51.8048	168.733	-1.7036	7.6857e-05	0.00085387	--	sp|Q99385|VCX1_YEAST Vacuolar calcium ion transporter OS=Saccharomyces cerevisiae (strain ATCC 204508 / S288c) GN=VCX1 PE=1 SV=1//3.1183e-06
CSA008409	126.217	312.635	-1.3086	0.00069035	0.0054293	--	sp|Q54VX4|MCFJ_DICDI Mitochondrial substrate carrier family protein J OS=Dictyostelium discoideum GN=mcfJ PE=2 SV=1//3.02689e-32
CSA008417	70.3131	750.568	-3.4161	2.3321e-17	3.0639e-15	--	sp|O80959|PLP6_ARATH Patatin-like protein 6 OS=Arabidopsis thaliana GN=PLP6 PE=2 SV=1//3.34122e-125
CSA008426	349.74	71.7953	2.2843	0.0013998	0.0097157	--	sp|Q9SK03|RAP27_ARATH Ethylene-responsive transcription factor RAP2-7 OS=Arabidopsis thaliana GN=RAP2-7 PE=2 SV=2//4.9056e-71
CSA008428	1018.54	184.749	2.4629	1.1874e-05	0.00017153	--	sp|Q9SX25|CXE6_ARATH Probable carboxylesterase 6 OS=Arabidopsis thaliana GN=CXE6 PE=2 SV=1//9.88764e-116
CSA008441	11.1656	113.394	-3.3442	0.00096113	0.0071331	--	sp|Q9LPW3|SCRM2_ARATH Transcription factor SCREAM2 OS=Arabidopsis thaliana GN=SCRM2 PE=1 SV=1//1.21472e-06
CSA008442	203.34	506.812	-1.3176	0.00025526	0.0023602	--	sp|Q3L181|PERR_RAUSE Perakine reductase OS=Rauvolfia serpentina GN=PR PE=1 SV=1//1.58332e-166
CSA008443	11.0993	36.5239	-1.7184	0.0070476	0.035027	--	sp|C6TBN2|AKR1_SOYBN Probable aldo-keto reductase 1 OS=Glycine max GN=AKR1 PE=2 SV=1//1.00897e-65
CSA008444	247.867	115.877	1.097	0.0057	0.029675	--	sp|P08103|HCK_MOUSE Tyrosine-protein kinase HCK OS=Mus musculus GN=Hck PE=1 SV=4//4.94137e-06
CSA008447	2799.65	1181.16	1.245	0.00044276	0.0037564	--	sp|Q9LIL4|P24B3_ARATH Transmembrane emp24 domain-containing protein p24beta3 OS=Arabidopsis thaliana GN=At3g22845 PE=2 SV=1//2.18793e-116
CSA008449	770.312	353.815	1.1224	0.0018815	0.01228	--	sp|Q9C7N2|CAD1_ARATH MACPF domain-containing protein CAD1 OS=Arabidopsis thaliana GN=CAD1 PE=2 SV=1//0
CSA008452	4.41952	34.6495	-2.9709	6.8881e-05	0.00077894	--	sp|Q9M9C5|Y1680_ARATH Probable leucine-rich repeat receptor-like protein kinase At1g68400 OS=Arabidopsis thaliana GN=At1g68400 PE=2 SV=1//0
CSA008457	6298.21	14752	-1.2279	0.0039747	0.022257	--	sp|Q9SGS4|CDSP_ARATH Thioredoxin-like protein CDSP32, chloroplastic OS=Arabidopsis thaliana GN=CDSP32 PE=1 SV=1//1.63569e-06
CSA008458	4085.12	9268.06	-1.1819	0.0030887	0.018275	--	sp|Q9SGS4|CDSP_ARATH Thioredoxin-like protein CDSP32, chloroplastic OS=Arabidopsis thaliana GN=CDSP32 PE=1 SV=1//4.16575e-18
CSA008464	116.835	7533.35	-6.0108	0.0022814	0.014359	--	sp|Q9LU14|APG2_ARATH GDSL esterase/lipase APG OS=Arabidopsis thaliana GN=APG PE=1 SV=1//3.43565e-177
CSA008465	47.5616	438.419	-3.2044	7.2654e-15	6.6574e-13	--	sp|Q8H1D6|RBK1_ARATH Receptor-like cytosolic serine/threonine-protein kinase RBK1 OS=Arabidopsis thaliana GN=RBK1 PE=1 SV=1//3.73209e-174
CSA008477	83.9877	930.589	-3.4699	6.0156e-07	1.2321e-05	--	sp|Q9FXA4|PUB26_ARATH U-box domain-containing protein 26 OS=Arabidopsis thaliana GN=PUB26 PE=2 SV=1//0
CSA008478	23.8544	62.3102	-1.3852	0.0077847	0.037908	--	sp|Q93XX5|Y5713_ARATH PI-PLC X domain-containing protein At5g67130 OS=Arabidopsis thaliana GN=At5g67130 PE=1 SV=1//1.09505e-138
CSA008490	0.939754	45.5491	-5.599	0.00017891	0.001752	--	-//-
CSA008491	2945.13	12.9201	7.8326	3.7057e-12	2.2701e-10	--	sp|F4HUK6|AAE1_ARATH Probable acyl-activating enzyme 1, peroxisomal OS=Arabidopsis thaliana GN=AAE1 PE=2 SV=1//0
CSA008492	1434.84	381.134	1.9125	1.055e-07	2.6281e-06	--	-//-
CSA008493	157.326	418.155	-1.4103	0.00044731	0.0037906	--	sp|Q10PP8|MTP4_ORYSJ Metal tolerance protein 4 OS=Oryza sativa subsp. japonica GN=MTP4 PE=2 SV=1//1.25196e-118
CSA008494	49.8252	144.681	-1.5379	0.0012636	0.0089352	--	-//-
CSA008498	394.811	796.47	-1.0125	0.0060078	0.030865	--	sp|Q1ACB3|HSTC_ARATH Homogentisate solanesyltransferase, chloroplastic OS=Arabidopsis thaliana GN=HST PE=1 SV=1//0
CSA008511	0.939754	42.65	-5.5041	0.00031023	0.0027791	--	sp|Q8VZ59|YUC6_ARATH Indole-3-pyruvate monooxygenase YUCCA6 OS=Arabidopsis thaliana GN=YUC6 PE=1 SV=1//0
CSA008512	295.684	851.435	-1.5258	2.8652e-05	0.00036478	--	sp|Q8GZA4|CBSX6_ARATH CBS domain-containing protein CBSX6 OS=Arabidopsis thaliana GN=CBSX6 PE=1 SV=1//1.17448e-177
CSA008516	381.727	53.2527	2.8416	2.6363e-05	0.0003395	--	sp|Q339X2|BGL34_ORYSJ Beta-glucosidase 34 OS=Oryza sativa subsp. japonica GN=BGLU34 PE=2 SV=1//2.32247e-132
CSA008524	546.87	235.333	1.2165	0.00097113	0.0071958	--	-//-
CSA008528	2215.54	533.254	2.0548	1.2467e-08	3.862e-07	--	sp|Q4F883|SG101_ARATH Senescence-associated carboxylesterase 101 OS=Arabidopsis thaliana GN=SAG101 PE=1 SV=1//1.73477e-108
CSA008542	0.62337	24.1415	-5.2753	0.0076201	0.037286	--	sp|Q9FXB6|LIP4_ARATH GDSL esterase/lipase LIP-4 OS=Arabidopsis thaliana GN=LIP4 PE=2 SV=1//4.04357e-26
CSA008544	0.930356	17.4047	-4.2256	0.00027942	0.0025443	--	sp|O80522|GDL2_ARATH GDSL esterase/lipase At1g09390 OS=Arabidopsis thaliana GN=At1g09390 PE=2 SV=1//3.21941e-23
CSA008545	0.930356	35.2603	-5.2441	0.0020558	0.01319	--	sp|O80522|GDL2_ARATH GDSL esterase/lipase At1g09390 OS=Arabidopsis thaliana GN=At1g09390 PE=2 SV=1//3.84527e-13
CSA008546	2121.93	1035.66	1.0348	0.0035194	0.02026	--	sp|Q9LZ98|AB20I_ARATH ABC transporter I family member 20 OS=Arabidopsis thaliana GN=ABCI20 PE=2 SV=1//2.68846e-165
CSA008551	45.5138	154.572	-1.7639	0.00020719	0.0019805	--	sp|Q9SR00|PP213_ARATH Pentatricopeptide repeat-containing protein At3g04760, chloroplastic OS=Arabidopsis thaliana GN=At3g04760 PE=2 SV=1//0
CSA008562	230.232	654.487	-1.5073	5.6381e-05	0.0006549	--	sp|Q9LW20|SKL1_ARATH Probable inactive shikimate kinase like 1, chloroplastic OS=Arabidopsis thaliana GN=SKL1 PE=2 SV=1//9.29084e-65
CSA008568	3905.94	1869.03	1.0634	0.0022086	0.013992	--	sp|Q8SAG3|ADF_VITVI Actin-depolymerizing factor OS=Vitis vinifera PE=2 SV=1//9.26886e-77
CSA008569	76.4381	212.39	-1.4744	0.00030416	0.002736	--	sp|Q9C5Y0|PLDD1_ARATH Phospholipase D delta OS=Arabidopsis thaliana GN=PLDDELTA PE=1 SV=2//0
CSA008570	42.7679	118.167	-1.4662	0.00112	0.0080736	--	sp|Q9C5Y0|PLDD1_ARATH Phospholipase D delta OS=Arabidopsis thaliana GN=PLDDELTA PE=1 SV=2//4.68593e-73
CSA008576	246.744	503.793	-1.0298	0.004786	0.025877	--	sp|Q9SYM5|RHM1_ARATH Trifunctional UDP-glucose 4,6-dehydratase/UDP-4-keto-6-deoxy-D-glucose 3,5-epimerase/UDP-4-keto-L-rhamnose-reductase RHM1 OS=Arabidopsis thaliana GN=RHM1 PE=1 SV=1//0
CSA008584	180.656	83.3919	1.1153	0.007087	0.035187	--	sp|Q568T4|HIKES_DANRE Protein Hikeshi OS=Danio rerio GN=zgc:110091 PE=2 SV=2//4.61352e-10
CSA008586	137.373	318.684	-1.214	0.0019416	0.012598	--	-//-
CSA008595	1067.52	445.214	1.2617	0.00040701	0.0035015	--	sp|Q9LQY3|P24D9_ARATH Transmembrane emp24 domain-containing protein p24delta9 OS=Arabidopsis thaliana GN=At1g26690 PE=2 SV=1//2.90462e-87
CSA008611	199.224	0.356056	9.1281	0.00013899	0.0014148	--	-//-
CSA008616	492.848	26.1067	4.2387	2.0975e-13	1.5515e-11	--	sp|Q67YU0|CKX5_ARATH Cytokinin dehydrogenase 5 OS=Arabidopsis thaliana GN=CKX5 PE=2 SV=1//0
CSA008617	2039.68	878.862	1.2146	0.0024415	0.01514	--	sp|P46266|1433_PEA 14-3-3-like protein OS=Pisum sativum PE=2 SV=1//8.55854e-176
CSA008621	16859.5	1463.05	3.5265	9.1874e-05	0.00099733	--	sp|Q00451|PRF1_SOLLC 36.4 kDa proline-rich protein OS=Solanum lycopersicum GN=TPRP-F1 PE=2 SV=1//1.35604e-18
CSA008622	102.643	527.03	-2.3602	0.0018597	0.012167	--	sp|Q55CU8|RSC5_DICDI Random slug protein 5 OS=Dictyostelium discoideum GN=rsc5 PE=2 SV=1//5.8249e-23
CSA008627	3678.97	1795.73	1.0347	0.0024835	0.015339	--	sp|Q9SZ67|WRK19_ARATH Probable WRKY transcription factor 19 OS=Arabidopsis thaliana GN=WRKY19 PE=2 SV=1//1.74612e-41
CSA008628	399.684	871.071	-1.1239	0.0024091	0.014987	--	sp|B8AAM2|GDT11_ORYSI GDT1-like protein 1, chloroplastic OS=Oryza sativa subsp. indica GN=OsI_00941 PE=3 SV=2//6.98014e-74
CSA008631	70.0588	260.848	-1.8966	9.5427e-06	0.00014254	--	sp|Q94IA6|C90D1_ARATH 3-epi-6-deoxocathasterone 23-monooxygenase OS=Arabidopsis thaliana GN=CYP90D1 PE=2 SV=1//6.52087e-74
CSA008632	48.8285	177.023	-1.8581	0.00030664	0.0027537	--	sp|Q94IW5|C90D2_ORYSJ Cytochrome P450 90D2 OS=Oryza sativa subsp. japonica GN=CYP90D2 PE=1 SV=1//2.85169e-74
CSA008634	45.2642	111.526	-1.3009	0.0095373	0.044344	--	sp|Q9LV52|HSFC1_ARATH Heat stress transcription factor C-1 OS=Arabidopsis thaliana GN=HSFC1 PE=2 SV=1//1.10772e-81
CSA008636	388.207	102.098	1.9269	0.00012208	0.0012666	--	-//-
CSA008637	493.005	136.319	1.8546	4.6644e-05	0.00055754	--	sp|Q9LYT3|TT12_ARATH Protein TRANSPARENT TESTA 12 OS=Arabidopsis thaliana GN=TT12 PE=2 SV=1//1.10739e-14
CSA008665	46.9158	1.05501	5.4747	0.00037555	0.0032771	--	sp|O64584|WAP_ARATH WPP domain-associated protein OS=Arabidopsis thaliana GN=WAP PE=1 SV=2//7.19025e-09
CSA008683	25.4073	0.664728	5.2563	0.0078861	0.038242	--	sp|Q54DY9|BCS1B_DICDI Probable mitochondrial chaperone BCS1-B OS=Dictyostelium discoideum GN=bcsl1b PE=3 SV=1//3.0404e-26
CSA008685	169.725	595.369	-1.8106	1.6854e-06	3.0875e-05	--	sp|P51820|DRTS_SOYBN Bifunctional dihydrofolate reductase-thymidylate synthase OS=Glycine max PE=1 SV=1//0
CSA008690	6.06631	50.1246	-3.0466	0.0018224	0.011969	--	sp|Q9SYM1|MSL6_ARATH Mechanosensitive ion channel protein 6 OS=Arabidopsis thaliana GN=MSL6 PE=1 SV=1//0
CSA008697	501.409	2604.79	-2.3771	0.0014122	0.0097862	--	sp|Q94AP3|WAT1_ARATH Protein WALLS ARE THIN 1 OS=Arabidopsis thaliana GN=WAT1 PE=1 SV=1//1.08024e-118
CSA008699	319.811	1.02078	8.2914	0.0002274	0.0021443	--	sp|Q9LY77|ACA12_ARATH Calcium-transporting ATPase 12, plasma membrane-type OS=Arabidopsis thaliana GN=ACA12 PE=2 SV=1//0
CSA008701	91.8804	30.6954	1.5817	0.0012135	0.0086373	--	sp|Q9LY77|ACA12_ARATH Calcium-transporting ATPase 12, plasma membrane-type OS=Arabidopsis thaliana GN=ACA12 PE=2 SV=1//0
CSA008706	392.457	1372.62	-1.8063	0.0025614	0.01574	--	sp|Q94JU2|WTR18_ARATH WAT1-related protein At3g28050 OS=Arabidopsis thaliana GN=At3g28050 PE=2 SV=1//1.66093e-72
CSA008709	420.186	1171.06	-1.4787	3.4403e-05	0.00042702	--	-//-
CSA008721	9.67674	471.439	-5.6064	3.738e-09	1.2803e-07	--	sp|Q0WP01|PTR9_ARATH Protein NRT1/ PTR FAMILY 5.10 OS=Arabidopsis thaliana GN=NPF5.10 PE=2 SV=1//0
CSA008741	202.774	98.3305	1.0442	0.010019	0.046126	--	-//-
CSA008742	837.881	155.812	2.4269	0.00025748	0.0023768	--	sp|Q9SVG4|RETOL_ARATH Reticuline oxidase-like protein OS=Arabidopsis thaliana GN=At4g20830 PE=1 SV=2//0
CSA008748	14.1987	140.002	-3.3016	0.0018467	0.012094	--	-//-
CSA008750	8.83056	97.1478	-3.4596	8.9235e-08	2.2734e-06	--	sp|F8WKW8|UGT9_GARJA Beta-D-glucosyl crocetin beta-1,6-glucosyltransferase OS=Gardenia jasminoides GN=UGT94E5 PE=1 SV=1//7.80729e-155
CSA008762	657.622	295.847	1.1524	0.0016496	0.011056	--	sp|Q9Y4D2|DGLA_HUMAN Sn1-specific diacylglycerol lipase alpha OS=Homo sapiens GN=DAGLA PE=1 SV=3//8.77439e-13
CSA008764	118.662	4.74128	4.6454	7.895e-12	4.4721e-10	--	sp|H2DH17|C7A22_PANGI Cytochrome P450 CYP749A22 OS=Panax ginseng PE=2 SV=1//0
CSA008765	674.758	52.4792	3.6846	1.5659e-19	2.7764e-17	--	-//-
CSA008769	1055.8	510.216	1.0492	0.0029025	0.017395	--	-//-
CSA008772	228.027	94.3356	1.2733	0.0014556	0.010023	--	sp|Q9SW11|PUB35_ARATH U-box domain-containing protein 35 OS=Arabidopsis thaliana GN=PUB35 PE=1 SV=2//1.44928e-39
CSA008773	2.90293	40.2392	-3.793	0.00023902	0.0022346	--	sp|P33543|TMKL1_ARATH Putative kinase-like protein TMKL1 OS=Arabidopsis thaliana GN=TMKL1 PE=1 SV=1//1.3787e-16
CSA008774	5.40581	32.2157	-2.5752	0.00048392	0.0040446	--	sp|P33543|TMKL1_ARATH Putative kinase-like protein TMKL1 OS=Arabidopsis thaliana GN=TMKL1 PE=1 SV=1//1.22698e-20
CSA008781	217.315	102.216	1.0882	0.0063358	0.032205	--	-//-
CSA008786	1096.68	87.4446	3.6486	6.7806e-09	2.2187e-07	--	sp|Q9LFP0|APT5_ARATH Adenine phosphoribosyltransferase 5 OS=Arabidopsis thaliana GN=APT5 PE=1 SV=1//1.51374e-105
CSA008799	320.897	92.9922	1.7869	0.0025659	0.015756	--	sp|Q9LMC9|GLT2_ARATH Germin-like protein subfamily T member 2 OS=Arabidopsis thaliana GN=At1g18980 PE=2 SV=1//5.47178e-62
CSA008809	19.7602	513.344	-4.6993	0.0055941	0.02924	--	sp|Q8GSM7|HST_TOBAC Shikimate O-hydroxycinnamoyltransferase OS=Nicotiana tabacum GN=HST PE=1 SV=1//3.59589e-37
CSA008828	0.306986	74.8768	-7.9302	6.0153e-17	7.37e-15	--	sp|O80919|TBL34_ARATH Protein trichome birefringence-like 34 OS=Arabidopsis thaliana GN=TBL34 PE=2 SV=2//1.06651e-178
CSA008830	0.306986	35.3274	-6.8465	1.931e-09	6.9839e-08	--	sp|O80919|TBL34_ARATH Protein trichome birefringence-like 34 OS=Arabidopsis thaliana GN=TBL34 PE=2 SV=2//6.08526e-92
CSA008831	0.316384	50.2858	-7.3123	1.3003e-12	8.6587e-11	--	sp|O80919|TBL34_ARATH Protein trichome birefringence-like 34 OS=Arabidopsis thaliana GN=TBL34 PE=2 SV=2//0
CSA008838	6.31782	184.605	-4.8689	3.046e-12	1.898e-10	--	sp|Q9S850|SUOX_ARATH Sulfite oxidase OS=Arabidopsis thaliana GN=SOX PE=1 SV=1//1.50928e-24
CSA008843	570.982	204.294	1.4828	6.0348e-05	0.00069635	--	sp|P57741|PFD3_ARATH Probable prefoldin subunit 3 OS=Arabidopsis thaliana GN=At5g49510 PE=1 SV=1//2.28267e-103
CSA008844	13.6116	41.2343	-1.599	0.0079259	0.038412	--	sp|Q8RWZ7|VHAA1_ARATH V-type proton ATPase subunit a1 OS=Arabidopsis thaliana GN=VHA-a1 PE=2 SV=1//1.6309e-57
CSA008855	1790.01	21755.7	-3.6034	2.1376e-21	5.0671e-19	--	sp|P27524|CB4A_SOLLC Chlorophyll a-b binding protein CP24 10A, chloroplastic OS=Solanum lycopersicum GN=CAP10A PE=3 SV=1//1.18796e-109
CSA008856	641.162	7314.92	-3.5121	2.1986e-20	4.5235e-18	--	sp|P27524|CB4A_SOLLC Chlorophyll a-b binding protein CP24 10A, chloroplastic OS=Solanum lycopersicum GN=CAP10A PE=3 SV=1//1.23899e-13
CSA008877	267.598	9.80769	4.77	2.9098e-14	2.4934e-12	--	sp|Q9SAH7|WRK40_ARATH Probable WRKY transcription factor 40 OS=Arabidopsis thaliana GN=WRKY40 PE=1 SV=1//4.06516e-67
CSA008885	20.7685	197.644	-3.2504	0.0019388	0.012588	--	sp|Q1S053|H2A3_MEDTR Probable histone H2A.3 OS=Medicago truncatula PE=3 SV=1//6.3964e-46
CSA008890	22.1634	414.574	-4.2254	0.00046389	0.0039137	--	sp|Q93Y09|SCP45_ARATH Serine carboxypeptidase-like 45 OS=Arabidopsis thaliana GN=SCPL45 PE=2 SV=1//0
CSA008892	5.10776	37.9547	-2.8935	5.627e-05	0.00065397	--	sp|Q9FFH3|IDD8_ARATH Zinc finger protein NUTCRACKER OS=Arabidopsis thaliana GN=NUC PE=2 SV=1//6.21644e-32
CSA008894	29.744	88.4972	-1.573	0.0012532	0.008878	--	-//-
CSA008896	3.51736	59.6565	-4.0841	0.00064036	0.005108	--	sp|Q8VYZ3|PME53_ARATH Probable pectinesterase 53 OS=Arabidopsis thaliana GN=PME53 PE=2 SV=1//0
CSA008899	89.9321	188.943	-1.071	0.0071767	0.035502	--	sp|Q9ZQE6|CML1_ARATH Calmodulin-like protein 1 OS=Arabidopsis thaliana GN=CML1 PE=2 SV=1//2.46181e-08
CSA008907	8.7822	42.6947	-2.2814	0.00056007	0.0045678	--	sp|O04017|NAC98_ARATH Protein CUP-SHAPED COTYLEDON 2 OS=Arabidopsis thaliana GN=NAC098 PE=1 SV=1//9.91225e-77
CSA008910	11538.1	474.097	4.6051	1.1098e-31	8.8011e-29	--	sp|Q9FH99|FB302_ARATH F-box protein At5g67140 OS=Arabidopsis thaliana GN=At5g67140 PE=2 SV=1//7.28782e-118
CSA008911	1.58146	37.2169	-4.5566	1.382e-07	3.3304e-06	--	sp|O48538|RBOHF_ARATH Respiratory burst oxidase homolog protein F OS=Arabidopsis thaliana GN=RBOHF PE=1 SV=1//0
CSA008915	51.323	422.798	-3.0423	1.9791e-07	4.5843e-06	--	sp|Q9SLN1|FPP7_ARATH Filament-like plant protein 7 OS=Arabidopsis thaliana GN=FPP7 PE=3 SV=2//4.85361e-174
CSA008916	0.306986	14.2035	-5.5319	0.00024295	0.0022657	--	-//-
CSA008917	32553.1	345729	-3.4088	1.7059e-13	1.2917e-11	--	sp|P27495|CB24_TOBAC Chlorophyll a-b binding protein 40, chloroplastic OS=Nicotiana tabacum GN=CAB40 PE=2 SV=1//2.57599e-175
CSA008940	8.79296	281.61	-5.0012	2.0892e-23	6.2846e-21	--	sp|P55229|GLGL1_ARATH Glucose-1-phosphate adenylyltransferase large subunit 1, chloroplastic OS=Arabidopsis thaliana GN=ADG2 PE=1 SV=3//2.55105e-150
CSA008941	0.316384	13.6631	-5.4325	0.00039387	0.0034099	--	sp|P55243|GLGL3_SOLTU Glucose-1-phosphate adenylyltransferase large subunit 3, chloroplastic/amyloplastic OS=Solanum tuberosum GN=AGPS3 PE=2 SV=1//4.45295e-25
CSA008942	2.19589	46.1223	-4.3926	1.843e-08	5.5133e-07	--	-//-
CSA008949	403.86	2271.76	-2.4919	5.8816e-07	1.209e-05	--	-//-
CSA008952	557.807	1.63155	8.4174	1.2326e-13	9.6697e-12	--	sp|Q6RYA0|SABP2_TOBAC Salicylic acid-binding protein 2 OS=Nicotiana tabacum GN=SABP2 PE=1 SV=1//4.62894e-59
CSA008956	109.079	307.881	-1.497	0.0001307	0.0013439	--	sp|P82715|PPD5_ARATH PsbP domain-containing protein 5, chloroplastic OS=Arabidopsis thaliana GN=PPD5 PE=1 SV=3//1.49631e-10
CSA008964	16.3001	80.1026	-2.297	0.0056929	0.029645	--	sp|Q9ZRF1|MTDH_FRAAN Probable mannitol dehydrogenase OS=Fragaria ananassa GN=CAD PE=2 SV=1//1.48585e-137
CSA008965	798.86	2177.08	-1.4464	5.5366e-05	0.00064518	--	sp|Q9ZRF1|MTDH_FRAAN Probable mannitol dehydrogenase OS=Fragaria ananassa GN=CAD PE=2 SV=1//4.51862e-149
CSA008975	151.277	26.2015	2.5295	3.8885e-08	1.0823e-06	--	sp|F4IB81|LYK3_ARATH LysM domain receptor-like kinase 3 OS=Arabidopsis thaliana GN=LYK3 PE=2 SV=1//2.39295e-38
CSA008980	0	43.4167	#NAME?	2.9839e-12	1.8619e-10	--	sp|Q9FJD5|LAC17_ARATH Laccase-17 OS=Arabidopsis thaliana GN=LAC17 PE=2 SV=1//0
CSA008985	5959.24	1740.75	1.7754	4.5385e-07	9.6118e-06	--	sp|Q6L3Z7|R1B14_SOLDE Putative late blight resistance protein homolog R1B-14 OS=Solanum demissum GN=R1B-14 PE=3 SV=1//1.21974e-116
CSA008991	698.86	2051.13	-1.5533	3.7727e-05	0.00046236	--	sp|Q9LD95|SIGF_ARATH RNA polymerase sigma factor sigF, chloroplastic OS=Arabidopsis thaliana GN=SIGF PE=1 SV=1//3.92762e-163
CSA008993	3154.72	1214.07	1.3777	0.0034276	0.019831	--	sp|A6BM06|ACCO1_DICMU 1-aminocyclopropane-1-carboxylate oxidase OS=Dictyostelium mucoroides GN=aco PE=3 SV=1//9.14189e-14
CSA009002	193.315	433.771	-1.166	0.0019136	0.012454	--	sp|O49696|ALMTC_ARATH Aluminum-activated malate transporter 12 OS=Arabidopsis thaliana GN=ALMT12 PE=2 SV=1//1.33287e-141
CSA009003	0	57.0713	#NAME?	0.0001985	0.0019137	--	sp|O48822|Y2794_ARATH WEB family protein At2g17940 OS=Arabidopsis thaliana GN=At2g17940 PE=2 SV=1//1.0256e-28
CSA009011	90.6683	28.7992	1.6546	0.0011271	0.0081176	--	sp|Q9FFI5|NAC86_ARATH NAC domain-containing protein 86 OS=Arabidopsis thaliana GN=NAC086 PE=2 SV=1//1.75532e-70
CSA009025	2225.5	5769.4	-1.3743	0.0074904	0.036758	--	sp|P51615|MAOX_VITVI NADP-dependent malic enzyme OS=Vitis vinifera PE=2 SV=1//0
CSA009027	705.797	331.184	1.0916	0.0022523	0.014224	--	sp|O94393|PSMD9_SCHPO Probable 26S proteasome regulatory subunit p27 OS=Schizosaccharomyces pombe (strain 972 / ATCC 24843) GN=nas2 PE=3 SV=1//3.06916e-18
CSA009038	84.6633	181.817	-1.1027	0.0069204	0.034524	--	sp|Q9FFN2|GLYT3_ARATH Probable glycosyltransferase At5g03795 OS=Arabidopsis thaliana GN=At5g03795 PE=3 SV=2//2.64685e-91
CSA009060	54.2502	189.552	-1.8049	1.5268e-05	0.00021277	--	sp|Q8LC03|ATB13_ARATH Homeobox-leucine zipper protein ATHB-13 OS=Arabidopsis thaliana GN=ATHB-13 PE=2 SV=2//7.58331e-61
CSA009072	43.5417	106.301	-1.2877	0.0052651	0.027823	--	sp|O74807|MHF1_SCHPO MHF histone-fold complex subunit 1 OS=Schizosaccharomyces pombe (strain 972 / ATCC 24843) GN=mhf1 PE=1 SV=2//9.41503e-06
CSA009074	667.852	229.846	1.5389	2.9793e-05	0.00037731	--	sp|O23429|VA724_ARATH Vesicle-associated membrane protein 724 OS=Arabidopsis thaliana GN=VAMP724 PE=2 SV=2//2.04618e-127
CSA009080	40.0709	9.46941	2.0812	0.0012112	0.0086248	--	-//-
CSA009086	1624.91	36.6621	5.4699	1.055e-36	1.2782e-33	--	sp|Q67XC9|TPPD_ARATH Probable trehalose-phosphate phosphatase D OS=Arabidopsis thaliana GN=TPPD PE=2 SV=1//1.0029e-161
CSA009089	132.77	4.73604	4.8091	1.5743e-06	2.9083e-05	--	sp|Q94AZ2|STP13_ARATH Sugar transport protein 13 OS=Arabidopsis thaliana GN=STP13 PE=1 SV=2//0
CSA009092	927.437	424.749	1.1266	0.0014877	0.010179	--	sp|Q38922|RAB1B_ARATH Ras-related protein RABB1b OS=Arabidopsis thaliana GN=RABB1B PE=2 SV=1//7.69285e-145
CSA009093	4536.82	1412.49	1.6834	5.12e-05	0.00060324	--	sp|Q9LY87|RGLG2_ARATH E3 ubiquitin-protein ligase RGLG2 OS=Arabidopsis thaliana GN=RGLG2 PE=1 SV=1//0
CSA009096	38.1537	10.4902	1.8628	0.0040697	0.022688	--	sp|Q9LTY6|UKL5_ARATH Uridine kinase-like protein 5 OS=Arabidopsis thaliana GN=UKL5 PE=2 SV=1//1.39609e-158
CSA009098	15.1371	49.0176	-1.6952	0.0040435	0.02257	--	-//-
CSA009100	92.9985	29.4126	1.6608	0.00042555	0.0036366	--	sp|P0C8S1|RP8L2_ARATH Probable disease resistance RPP8-like protein 2 OS=Arabidopsis thaliana GN=RPP8L2 PE=3 SV=1//5.61149e-127
CSA009101	13.2397	136.789	-3.369	0.0080373	0.038792	--	-//-
CSA009106	5985.29	2329.85	1.3612	0.0001033	0.0011021	--	sp|Q9LYS2|AB10C_ARATH ABC transporter C family member 10 OS=Arabidopsis thaliana GN=ABCC10 PE=2 SV=2//0
CSA009117	2877.7	490.276	2.5533	2.5889e-12	1.641e-10	--	sp|Q7XJR9|CDPKG_ARATH Calcium-dependent protein kinase 16 OS=Arabidopsis thaliana GN=CPK16 PE=3 SV=1//0
CSA009126	0.632768	375.299	-9.2121	4.1358e-05	0.0005024	--	sp|O81037|BH070_ARATH Transcription factor bHLH70 OS=Arabidopsis thaliana GN=BHLH70 PE=2 SV=1//3.29224e-40
CSA009128	310.413	1298.83	-2.065	1.7123e-08	5.1577e-07	--	sp|C0LGH8|Y1634_ARATH Probable LRR receptor-like serine/threonine-protein kinase At1g63430 OS=Arabidopsis thaliana GN=At1g63430 PE=2 SV=1//0
CSA009135	111.878	272.903	-1.2865	0.00098654	0.0072895	--	sp|Q9XIN8|FB119_ARATH F-box protein At2g27310 OS=Arabidopsis thaliana GN=At2g27310 PE=2 SV=1//2.57248e-29
CSA009136	1512.64	249.391	2.6006	2.3138e-12	1.4733e-10	--	-//-
CSA009146	0.669904	60.3153	-6.4924	0.00024155	0.0022546	--	sp|Q6X7K0|WOX1_ARATH WUSCHEL-related homeobox 1 OS=Arabidopsis thaliana GN=WOX1 PE=2 SV=2//8.53872e-40
CSA009147	1479.2	655.458	1.1742	0.00099815	0.0073591	--	sp|Q9LVH4|CAR4_ARATH Protein C2-DOMAIN ABA-RELATED 4 OS=Arabidopsis thaliana GN=CAR4 PE=1 SV=1//4.60494e-82
CSA009150	0.669904	13.7237	-4.3566	0.00087831	0.0066246	--	sp|Q69VD5|PNH1_ORYSJ Protein argonaute PNH1 OS=Oryza sativa subsp. japonica GN=PHN1 PE=2 SV=1//0
CSA009161	61.8566	704.929	-3.5105	1.5772e-06	2.9125e-05	--	sp|Q9FZ86|PDCB3_ARATH PLASMODESMATA CALLOSE-BINDING PROTEIN 3 OS=Arabidopsis thaliana GN=PDCB3 PE=1 SV=1//3.59947e-35
CSA009167	17.9103	68.4066	-1.9333	0.0060527	0.031064	--	-//-
CSA009181	944.083	3794.77	-2.007	2.4488e-06	4.2879e-05	--	sp|Q8W486|Y1491_ARATH Uncharacterized protein At1g04910 OS=Arabidopsis thaliana GN=At1g04910 PE=2 SV=1//3.23404e-71
CSA009182	313.087	1223.81	-1.9667	1.3202e-06	2.4895e-05	--	-//-
CSA009186	11577	1074.94	3.4289	0.0030231	0.017965	--	sp|Q96552|METK2_CATRO S-adenosylmethionine synthase 2 OS=Catharanthus roseus GN=SAMS2 PE=1 SV=1//0
CSA009189	1.68393	16.0312	-3.251	0.0022725	0.014308	--	sp|Q84TF5|RHA4A_ARATH RING-H2 zinc finger protein RHA4a OS=Arabidopsis thaliana GN=RHA4A PE=2 SV=1//2.14173e-15
CSA009193	225.379	55.2725	2.0277	1.0696e-06	2.0578e-05	--	sp|Q9BZV1|UBXN6_HUMAN UBX domain-containing protein 6 OS=Homo sapiens GN=UBXN6 PE=1 SV=1//1.48431e-07
CSA009196	0	30.2498	#NAME?	0.001203	0.0085809	--	sp|P42734|CADH9_ARATH Probable cinnamyl alcohol dehydrogenase 9 OS=Arabidopsis thaliana GN=CAD9 PE=2 SV=2//1.8313e-30
CSA009198	24.598	0.308671	6.3163	6.2739e-05	0.00071956	--	-//-
CSA009209	163190	27886.3	2.5489	1.5119e-12	9.9613e-11	--	sp|P69322|UBIQP_PEA Polyubiquitin OS=Pisum sativum GN=PU1 PE=2 SV=2//0
CSA009213	222.753	24.9227	3.1599	2.8104e-12	1.7663e-10	--	sp|Q9P7W0|OPA3_SCHPO OPA3-like protein OS=Schizosaccharomyces pombe (strain 972 / ATCC 24843) GN=SPBC1703.11 PE=3 SV=1//1.66403e-10
CSA009216	822.472	355.071	1.2119	0.00084367	0.0064009	--	-//-
CSA009220	5.97325	26.8366	-2.1676	0.0058416	0.030232	--	sp|Q8GS60|HCAR_ARATH 7-hydroxymethyl chlorophyll a reductase, chloroplastic OS=Arabidopsis thaliana GN=HCAR PE=1 SV=1//9.35908e-34
CSA009240	67.1708	1.28207	5.7113	3.88e-13	2.7487e-11	--	sp|Q8RXX9|ATL6_ARATH E3 ubiquitin-protein ligase ATL6 OS=Arabidopsis thaliana GN=ATL6 PE=1 SV=2//1.38133e-61
CSA009251	0.316384	10.227	-5.0146	0.0028699	0.017238	--	sp|Q9LJZ5|UBC19_ARATH Ubiquitin-conjugating enzyme E2 19 OS=Arabidopsis thaliana GN=UBC19 PE=1 SV=1//2.1673e-70
CSA009262	649.81	278.245	1.2237	0.0011754	0.008421	--	sp|Q9M9M4|CSLD3_ARATH Cellulose synthase-like protein D3 OS=Arabidopsis thaliana GN=CSLD3 PE=1 SV=1//0
CSA009266	139.671	389.833	-1.4808	0.0024413	0.01514	--	sp|Q9FZ59|PEPR2_ARATH Leucine-rich repeat receptor-like protein kinase PEPR2 OS=Arabidopsis thaliana GN=PEPR2 PE=1 SV=1//7.8004e-07
CSA009267	74.7401	199.099	-1.4135	0.0087566	0.041479	--	sp|Q9SGP2|HSL1_ARATH Receptor-like protein kinase HSL1 OS=Arabidopsis thaliana GN=HSL1 PE=2 SV=1//3.4396e-06
CSA009268	518.895	1491.06	-1.5228	1.9452e-05	0.00026243	--	-//-
CSA009270	142.661	11.3984	3.6457	6.9473e-13	4.757e-11	--	sp|Q94AH6|CUL1_ARATH Cullin-1 OS=Arabidopsis thaliana GN=CUL1 PE=1 SV=1//1.22229e-30
CSA009272	307.245	122.168	1.3305	0.00061005	0.0049084	--	-//-
CSA009284	78.9054	251.56	-1.6727	3.5381e-05	0.0004378	--	sp|O49459|NAC73_ARATH NAC domain-containing protein 73 OS=Arabidopsis thaliana GN=NAC073 PE=2 SV=1//9.96919e-93
CSA009286	0.949152	11.2806	-3.5711	0.0077244	0.037707	--	sp|Q5XF57|Y5576_ARATH Probable receptor-like serine/threonine-protein kinase At5g57670 OS=Arabidopsis thaliana GN=At5g57670 PE=2 SV=1//0
CSA009290	13.2773	50.0291	-1.9138	0.0011126	0.0080409	--	sp|Q9P6Q3|BCS1_SCHPO Probable mitochondrial chaperone bcs1 OS=Schizosaccharomyces pombe (strain 972 / ATCC 24843) GN=SPAC644.07 PE=2 SV=1//7.19944e-22
CSA009293	1.94438	23.8098	-3.6142	0.00011349	0.001191	--	sp|Q9LSW9|ATL16_ARATH RING-H2 finger protein ATL16 OS=Arabidopsis thaliana GN=ATL16 PE=2 SV=1//3.85657e-83
CSA009306	210.275	20.5033	3.3584	0.0024169	0.015012	--	sp|Q96552|METK2_CATRO S-adenosylmethionine synthase 2 OS=Catharanthus roseus GN=SAMS2 PE=1 SV=1//7.53562e-91
CSA009309	784.894	235.445	1.7371	2.9811e-06	5.1051e-05	--	sp|Q0WUU6|PLT4_ARATH Probable polyol transporter 4 OS=Arabidopsis thaliana GN=PLT4 PE=2 SV=1//0
CSA009320	1657.9	707.411	1.2287	0.00050479	0.0041827	--	sp|Q94A20|BI1L_ARATH BI1-like protein OS=Arabidopsis thaliana GN=At4g15470 PE=2 SV=1//7.97636e-59
CSA009328	663.579	277.293	1.2589	0.00060159	0.0048547	--	-//-
CSA009334	92.9099	403.09	-2.1172	9.5703e-08	2.4171e-06	--	sp|P00965|GLNA3_PHAVU Glutamine synthetase N-1 OS=Phaseolus vulgaris GN=Gln-gamma PE=2 SV=2//1.58195e-94
CSA009343	46.4648	286.487	-2.6243	6.8443e-05	0.0007754	--	sp|Q9SLN1|FPP7_ARATH Filament-like plant protein 7 OS=Arabidopsis thaliana GN=FPP7 PE=3 SV=2//3.68351e-07
CSA009348	294.026	1311.11	-2.1568	9.5406e-07	1.8536e-05	--	sp|Q93XM7|MCAT_ARATH Mitochondrial carnitine/acylcarnitine carrier-like protein OS=Arabidopsis thaliana GN=BOU PE=2 SV=1//3.08899e-170
CSA009371	99.7032	391.249	-1.9724	5.3008e-07	1.1068e-05	--	sp|Q9FZA4|DOF14_ARATH Dof zinc finger protein DOF1.4 OS=Arabidopsis thaliana GN=DOF1.4 PE=2 SV=1//1.84088e-32
CSA009372	71.9232	617.478	-3.1019	0.0040547	0.022621	--	-//-
CSA009374	1369.52	452.458	1.5978	0.00015689	0.0015725	--	sp|O48962|EBP_ARATH Probable 3-beta-hydroxysteroid-Delta(8),Delta(7)-isomerase OS=Arabidopsis thaliana GN=At1g20050 PE=2 SV=1//6.25104e-65
CSA009375	9196.36	4130.76	1.1547	0.00073417	0.0057089	--	sp|Q06445|CYTI_VIGUN Cysteine proteinase inhibitor OS=Vigna unguiculata PE=3 SV=1//4.67866e-36
CSA009377	459.868	98.7965	2.2187	1.0933e-08	3.4259e-07	--	-//-
CSA009378	2905.66	627.258	2.2117	2.5925e-07	5.8437e-06	--	sp|Q2RBN7|CLH1_ORYSJ Clathrin heavy chain 1 OS=Oryza sativa subsp. japonica GN=Os11g0104900 PE=3 SV=1//0
CSA009379	359.939	901.051	-1.3239	0.00041301	0.003544	--	sp|Q8GSA7|CMTA3_ARATH Calmodulin-binding transcription activator 3 OS=Arabidopsis thaliana GN=CMTA3 PE=1 SV=1//1.47699e-26
CSA009397	1807.57	471.682	1.9382	5.3423e-08	1.4364e-06	--	sp|Q485R8|PY2CR_COLP3 Delta(1)-pyrroline-2-carboxylate reductase OS=Colwellia psychrerythraea (strain 34H / ATCC BAA-681) GN=lhpI PE=1 SV=1//3.1738e-49
CSA009412	278.05	2162.85	-2.9595	3.7239e-10	1.5499e-08	--	sp|Q9LSM9|SCP33_ARATH Serine carboxypeptidase-like 33 OS=Arabidopsis thaliana GN=SCPL33 PE=2 SV=2//0
CSA009417	5155.21	921.788	2.4835	1.5705e-11	8.3741e-10	--	sp|Q9SZB9|PER47_ARATH Peroxidase 47 OS=Arabidopsis thaliana GN=PER47 PE=2 SV=2//6.36604e-153
CSA009421	81.2474	29.4369	1.4647	0.0026482	0.016167	--	sp|Q9SYQ0|IDM3_ARATH Increased DNA methylation 3 OS=Arabidopsis thaliana GN=IDM3 PE=1 SV=1//1.49458e-14
CSA009422	396.934	917.424	-1.2087	0.00060523	0.004875	--	sp|Q9CA63|FBK29_ARATH F-box/kelch-repeat protein At1g74510 OS=Arabidopsis thaliana GN=At1g74510 PE=2 SV=1//1.40355e-179
CSA009428	0.35352	9.28779	-4.7155	0.0052266	0.027696	--	sp|Q9FWX2|NAC7_ARATH NAC domain-containing protein 7 OS=Arabidopsis thaliana GN=NAC007 PE=1 SV=2//7.28753e-80
CSA009429	4865.67	1989.18	1.2905	0.00027285	0.0024928	--	sp|Q2PCF1|PDR2_NICPL Pleiotropic drug resistance protein 2 OS=Nicotiana plumbaginifolia GN=PDR2 PE=2 SV=1//2.25745e-19
CSA009433	62.0024	266.448	-2.1035	0.0093268	0.043569	--	sp|C0LGH3|Y5614_ARATH Probable LRR receptor-like serine/threonine-protein kinase At1g56140 OS=Arabidopsis thaliana GN=At1g56140 PE=2 SV=2//1.91757e-106
CSA009437	85.7234	29.5574	1.5362	0.0023274	0.014592	--	sp|P81392|MYB06_ANTMA Myb-related protein 306 OS=Antirrhinum majus GN=MYB306 PE=2 SV=1//1.10591e-110
CSA009440	190.711	1332.93	-2.8051	1.6892e-08	5.0987e-07	--	sp|Q8W3Z1|BAMS_BETPL Beta-amyrin synthase OS=Betula platyphylla GN=OSCBPY PE=1 SV=1//9.78286e-133
CSA009444	1875.41	15012.1	-3.0008	6.1567e-08	1.6285e-06	--	sp|P37220|ASR3_SOLLC Abscisic stress-ripening protein 3 OS=Solanum lycopersicum GN=ASR3 PE=4 SV=2//3.20764e-07
CSA009445	398.52	865.483	-1.1189	0.0023508	0.014696	--	sp|Q9FYF9|FB76_ARATH F-box protein At1g67340 OS=Arabidopsis thaliana GN=At1g67340 PE=1 SV=1//2.61581e-165
CSA009460	49.3544	1.04843	5.5569	0.00082224	0.0062677	--	sp|Q5SN75|P2C08_ORYSJ Probable protein phosphatase 2C 8 OS=Oryza sativa subsp. japonica GN=Os01g0656200 PE=2 SV=1//7.54184e-91
CSA009466	368.481	89.8365	2.0362	6.9274e-05	0.00078278	--	sp|O23299|ECI2_ARATH Enoyl-CoA delta isomerase 2, peroxisomal OS=Arabidopsis thaliana GN=ECI2 PE=1 SV=1//4.90399e-85
CSA009471	50.3695	16.3319	1.6249	0.0053864	0.028333	--	sp|P98204|ALA1_ARATH Phospholipid-transporting ATPase 1 OS=Arabidopsis thaliana GN=ALA1 PE=2 SV=1//1.30597e-152
CSA009478	3752.65	161.616	4.5373	8.1434e-18	1.1325e-15	--	sp|B8XCH5|QKY_ARATH Protein QUIRKY OS=Arabidopsis thaliana GN=QKY PE=2 SV=1//2.28662e-26
CSA009486	248.13	920.987	-1.8921	0.00021404	0.0020344	--	-//-
CSA009491	82.7285	0	Inf	4.8257e-19	7.9129e-17	--	-//-
CSA009492	88.0957	0	Inf	4.0499e-12	2.4603e-10	--	-//-
CSA009497	314.393	887.081	-1.4965	4.1784e-05	0.00050696	--	-//-
CSA009500	83.7423	205.328	-1.2939	0.0012884	0.0090756	--	sp|Q8GXC7|FBK50_ARATH F-box/kelch-repeat protein At3g06240 OS=Arabidopsis thaliana GN=At3g06240 PE=2 SV=1//6.25669e-48
CSA009504	9095.75	8.60528	10.046	1.1777e-37	1.657e-34	--	-//-
CSA009530	289.614	1597.09	-2.4632	1.3856e-07	3.3372e-06	--	sp|Q9SCY2|FKB13_ARATH Peptidyl-prolyl cis-trans isomerase FKBP13, chloroplastic OS=Arabidopsis thaliana GN=FKBP13 PE=1 SV=2//1.21787e-70
CSA009544	2.04685	14.7004	-2.8444	0.0068442	0.034227	--	-//-
CSA009545	3.63771	20.1354	-2.4686	0.0050231	0.026863	--	-//-
CSA009553	6.60551	101.274	-3.9384	0.0060976	0.031245	--	sp|Q8LF21|DRP1C_ARATH Dynamin-related protein 1C OS=Arabidopsis thaliana GN=DRP1C PE=1 SV=2//0
CSA009555	32.762	254.216	-2.956	5.2871e-07	1.1044e-05	--	-//-
CSA009569	29.0664	100.85	-1.7948	0.00015293	0.0015405	--	-//-
CSA009571	634.181	2217.03	-1.8057	5.4186e-07	1.1276e-05	--	sp|Q8L706|SYT5_ARATH Synaptotagmin-5 OS=Arabidopsis thaliana GN=SYT5 PE=2 SV=1//1.32723e-07
CSA009572	65.2322	223.809	-1.7786	2.2833e-05	0.00030033	--	-//-
CSA009575	19071.7	660.297	4.8522	1.3115e-14	1.1794e-12	--	sp|P0CH32|UBQ4_ARATH Polyubiquitin 4 OS=Arabidopsis thaliana GN=UBQ4 PE=1 SV=1//0
CSA009577	639.533	317.269	1.0113	0.0049151	0.026415	--	sp|Q9FVR6|Y1222_ARATH Uncharacterized protein At1g32220, chloroplastic OS=Arabidopsis thaliana GN=At1g32220 PE=2 SV=1//1.03015e-35
CSA009583	342.483	22.229	3.9455	7.8157e-06	0.00011974	--	sp|A0MFL4|LOR17_ARATH Protein LURP-one-related 17 OS=Arabidopsis thaliana GN=At5g41590 PE=2 SV=2//2.95117e-50
CSA009585	49.8693	154.353	-1.63	0.00018138	0.0017726	--	sp|Q9LJD7|COP10_ARATH Constitutive photomorphogenesis protein 10 OS=Arabidopsis thaliana GN=COP10 PE=1 SV=1//2.97128e-24
CSA009598	253.71	122.714	1.0479	0.0075652	0.037063	--	sp|O04539|SNL4_ARATH Paired amphipathic helix protein Sin3-like 4 OS=Arabidopsis thaliana GN=SNL4 PE=3 SV=3//4.72449e-44
CSA009599	877.719	391.039	1.1664	0.0012313	0.008744	--	sp|O04539|SNL4_ARATH Paired amphipathic helix protein Sin3-like 4 OS=Arabidopsis thaliana GN=SNL4 PE=3 SV=3//3.13337e-138
CSA009600	2835.84	1397.41	1.021	0.0033669	0.019544	--	sp|P49299|CYSZ_CUCMA Citrate synthase, glyoxysomal OS=Cucurbita maxima PE=1 SV=1//0
CSA009608	135.073	368.538	-1.4481	0.00014767	0.0014934	--	sp|P23525|IN37_SPIOL 2-methyl-6-phytyl-1,4-hydroquinone methyltransferase, chloroplastic OS=Spinacia oleracea PE=1 SV=1//5.6247e-171
CSA009614	60.6914	139.971	-1.2056	0.0064892	0.03282	--	sp|Q2V4B2|PQL3_ARATH PsbQ-like protein 3, chloroplastic OS=Arabidopsis thaliana GN=PQL3 PE=2 SV=1//1.04059e-25
CSA009615	1445.03	621.875	1.2164	0.00064606	0.0051459	--	sp|O94260|G3BP_SCHPO Putative G3BP-like protein OS=Schizosaccharomyces pombe (strain 972 / ATCC 24843) GN=nxt3 PE=1 SV=1//3.73365e-21
CSA009619	2.56775	52.1563	-4.3443	4.5071e-06	7.3766e-05	--	sp|Q9FUA4|SPT_ARATH Transcription factor SPATULA OS=Arabidopsis thaliana GN=SPT PE=1 SV=1//5.45763e-29
CSA009620	3.38665	68.9628	-4.3479	2.5232e-05	0.00032744	--	-//-
CSA009625	28.137	454.652	-4.0142	1.3473e-19	2.4282e-17	--	sp|P43298|TMK1_ARATH Receptor protein kinase TMK1 OS=Arabidopsis thaliana GN=TMK1 PE=1 SV=1//0
CSA009626	49.9521	820.941	-4.0387	1.1798e-22	3.2162e-20	--	sp|Q9SWW6|CESA7_ARATH Cellulose synthase A catalytic subunit 7 [UDP-forming] OS=Arabidopsis thaliana GN=CESA7 PE=1 SV=1//0
CSA009632	2359.22	1078.39	1.1294	0.0012908	0.0090883	--	sp|Q84WV0|GLYC7_ARATH Serine hydroxymethyltransferase 7 OS=Arabidopsis thaliana GN=SHM7 PE=2 SV=1//0
CSA009634	37.3442	6.27148	2.574	0.00027868	0.0025387	--	sp|O04086|Y1105_ARATH Probable receptor-like protein kinase At1g11050 OS=Arabidopsis thaliana GN=At1g11050 PE=2 SV=1//2.38821e-99
CSA009643	68.291	164.167	-1.2654	0.0024693	0.01528	--	sp|Q9ASX5|Y5520_ARATH Uncharacterized aarF domain-containing protein kinase At5g05200, chloroplastic OS=Arabidopsis thaliana GN=At5g05200 PE=2 SV=1//5.94672e-08
CSA009659	239.395	102.304	1.2265	0.0018463	0.012094	--	sp|Q9FHE4|BRG1_ARATH BOI-related E3 ubiquitin-protein ligase 1 OS=Arabidopsis thaliana GN=BRG1 PE=1 SV=1//4.60793e-45
CSA009665	51.2387	372.306	-2.8612	0.0031355	0.018519	--	sp|Q9SUC9|UGPI7_ARATH Uncharacterized GPI-anchored protein At4g28100 OS=Arabidopsis thaliana GN=At4g28100 PE=1 SV=1//4.86298e-134
CSA009671	776.723	21.8538	5.1514	7.4491e-25	2.6852e-22	--	sp|Q39214|RPM1_ARATH Disease resistance protein RPM1 OS=Arabidopsis thaliana GN=RPM1 PE=1 SV=1//3.22372e-138
CSA009672	5810.52	84.2363	6.1081	0.00011225	0.0011809	--	sp|P04284|PR06_SOLLC Pathogenesis-related leaf protein 6 OS=Solanum lycopersicum GN=PR1B1 PE=1 SV=2//6.48709e-76
CSA009681	213.467	58.864	1.8586	7.7199e-06	0.00011848	--	sp|Q9LDG2|TBL10_ARATH Protein trichome birefringence-like 10 OS=Arabidopsis thaliana GN=TBL10 PE=2 SV=1//1.26871e-52
CSA009682	287.164	79.0804	1.8605	2.9324e-06	5.0376e-05	--	sp|Q5BPJ0|TBL11_ARATH Protein trichome birefringence-like 11 OS=Arabidopsis thaliana GN=TBL11 PE=2 SV=1//6.4243e-69
CSA009690	1.64679	23.5874	-3.8403	0.00549	0.028799	--	sp|Q9FL63|Y5410_ARATH Inactive leucine-rich repeat receptor-like serine/threonine-protein kinase At5g24100 OS=Arabidopsis thaliana GN=At5g24100 PE=2 SV=1//1.05327e-40
CSA009695	1346.93	3103.86	-1.2044	0.00068641	0.0054022	--	sp|Q43314|DHE1_ARATH Glutamate dehydrogenase 1 OS=Arabidopsis thaliana GN=GDH1 PE=2 SV=1//0
CSA009699	555.073	134.662	2.0433	0.0024077	0.014981	--	sp|Q9C519|WRKY6_ARATH WRKY transcription factor 6 OS=Arabidopsis thaliana GN=WRKY6 PE=1 SV=1//4.2804e-117
CSA009711	111.182	250.83	-1.1738	0.003163	0.01862	--	sp|F4KE63|SYVM2_ARATH Valine--tRNA ligase, chloroplastic/mitochondrial 2 OS=Arabidopsis thaliana GN=EMB2247 PE=3 SV=1//3.08882e-146
CSA009714	163.078	719.106	-2.1406	2.2148e-06	3.9237e-05	--	sp|F4I9E1|NFD4_ARATH Protein NUCLEAR FUSION DEFECTIVE 4 OS=Arabidopsis thaliana GN=NFD4 PE=3 SV=1//2.11909e-21
CSA009717	5811.94	2664.11	1.1254	0.0011584	0.0083184	--	sp|Q9FYG3|PLST2_ARATH Probable plastidic glucose transporter 2 OS=Arabidopsis thaliana GN=At1g67300 PE=2 SV=1//0
CSA009742	308.66	14.7168	4.3905	0.00021152	0.0020161	--	sp|Q9CA57|GSTUA_ARATH Glutathione S-transferase U10 OS=Arabidopsis thaliana GN=GSTU10 PE=2 SV=1//1.42796e-43
CSA009744	0.316384	12.8253	-5.3412	0.00055706	0.0045475	--	sp|Q42716|C71A8_MENPI Cytochrome P450 71A8 OS=Mentha piperita GN=CYP71A8 PE=3 SV=1//4.36938e-177
CSA009747	20.6919	71.6131	-1.7912	0.0053987	0.028386	--	sp|Q42716|C71A8_MENPI Cytochrome P450 71A8 OS=Mentha piperita GN=CYP71A8 PE=3 SV=1//2.60497e-91
CSA009754	80.0304	182.678	-1.1907	0.0040333	0.022532	--	-//-
CSA009759	3167.11	10539.5	-1.7346	0.00040186	0.0034681	--	sp|P31853|ATPX_SPIOL ATP synthase subunit b&apos;, chloroplastic OS=Spinacia oleracea GN=ATPG PE=1 SV=2//7.46718e-50
CSA009763	463.035	174.041	1.4117	0.00015813	0.0015811	--	sp|Q9M9E8|FB92_ARATH F-box protein At1g78280 OS=Arabidopsis thaliana GN=At1g78280 PE=2 SV=3//6.91883e-119
CSA009764	1176.82	428.019	1.4592	4.3032e-05	0.00051964	--	sp|Q9M9E8|FB92_ARATH F-box protein At1g78280 OS=Arabidopsis thaliana GN=At1g78280 PE=2 SV=3//0
CSA009769	900.238	51.9883	4.114	4.0703e-08	1.1265e-06	--	sp|Q9FFR9|CHX18_ARATH Cation/H(+) antiporter 18 OS=Arabidopsis thaliana GN=CHX18 PE=2 SV=1//0
CSA009770	75.2596	209.641	-1.478	0.00035582	0.0031271	--	-//-
CSA009773	351.877	827.026	-1.2329	0.0007971	0.0061103	--	sp|Q9LVY0|PRFB1_ARATH Peptide chain release factor PrfB1, chloroplastic OS=Arabidopsis thaliana GN=PRFB1 PE=2 SV=1//1.20378e-147
CSA009790	366.939	1015.18	-1.4681	4.1148e-05	0.00050021	--	sp|Q8H1F5|IDD7_ARATH Protein indeterminate-domain 7 OS=Arabidopsis thaliana GN=IDD7 PE=2 SV=1//3.84148e-107
CSA009800	645.783	308.918	1.0638	0.0026431	0.016144	--	sp|C0LGP4|Y3475_ARATH Probable LRR receptor-like serine/threonine-protein kinase At3g47570 OS=Arabidopsis thaliana GN=At3g47570 PE=2 SV=1//3.18193e-110
CSA009801	1035.79	281.885	1.8776	1.6471e-07	3.9003e-06	--	sp|Q84MB3|ACCH1_ARATH 1-aminocyclopropane-1-carboxylate oxidase homolog 1 OS=Arabidopsis thaliana GN=At1g06620 PE=2 SV=1//8.97469e-130
CSA009806	147.446	300.489	-1.0271	0.0064146	0.03251	--	sp|Q9XIA9|LACS2_ARATH Long chain acyl-CoA synthetase 2 OS=Arabidopsis thaliana GN=LACS2 PE=2 SV=1//2.19396e-07
CSA009812	10.1685	0.705534	3.8492	0.0087058	0.041279	--	sp|Q39214|RPM1_ARATH Disease resistance protein RPM1 OS=Arabidopsis thaliana GN=RPM1 PE=1 SV=1//3.17843e-137
CSA009815	113.474	578.585	-2.3502	2.0221e-09	7.2829e-08	--	-//-
CSA009818	229.537	783.558	-1.7713	1.9607e-06	3.5223e-05	--	sp|Q9C9N6|PMI2_ARATH Protein PLASTID MOVEMENT IMPAIRED 2 OS=Arabidopsis thaliana GN=PMI2 PE=1 SV=1//1.53827e-91
CSA009819	10.0204	54.3722	-2.4399	5.5569e-05	0.00064702	--	sp|Q8LFD1|LPP3_ARATH Putative lipid phosphate phosphatase 3, chloroplastic OS=Arabidopsis thaliana GN=LPP3 PE=2 SV=1//1.12389e-150
CSA009820	0	36.6226	#NAME?	1.0084e-10	4.6247e-09	--	sp|Q9C9N3|C3H14_ARATH Zinc finger CCCH domain-containing protein 14 OS=Arabidopsis thaliana GN=At1g66810 PE=2 SV=1//1.23069e-67
CSA009824	38.0259	223.829	-2.5573	4.8518e-06	7.8578e-05	--	sp|A8MRC7|B3GT2_ARATH Probable beta-1,3-galactosyltransferase 2 OS=Arabidopsis thaliana GN=B3GALT2 PE=2 SV=1//8.64932e-120
CSA009831	157.277	780.146	-2.3104	0.0014017	0.0097227	--	-//-
CSA009834	139.547	588.565	-2.0765	0.0011748	0.0084198	--	sp|Q0WPE9|NAT7_ARATH Nucleobase-ascorbate transporter 7 OS=Arabidopsis thaliana GN=NAT7 PE=2 SV=2//0
CSA009835	146.188	1227.37	-3.0697	1.2093e-15	1.2126e-13	--	-//-
CSA009841	344.311	1418.72	-2.0428	6.1379e-08	1.6245e-06	--	sp|Q9M0Z3|KEA3_ARATH K(+) efflux antiporter 3, chloroplastic OS=Arabidopsis thaliana GN=KEA3 PE=2 SV=2//0
CSA009842	236.867	796.244	-1.7491	3.2196e-06	5.4641e-05	--	sp|Q9M0Z3|KEA3_ARATH K(+) efflux antiporter 3, chloroplastic OS=Arabidopsis thaliana GN=KEA3 PE=2 SV=2//3.2336e-35
CSA009845	1499.72	166.491	3.1712	3.5216e-07	7.684e-06	--	sp|P93111|HEM11_CUCSA Glutamyl-tRNA reductase 1, chloroplastic OS=Cucumis sativus GN=HEMA1 PE=2 SV=1//0
CSA009846	1.55373	14.547	-3.2269	0.0049765	0.026681	--	-//-
CSA009848	572.532	248.341	1.205	0.0013429	0.0093991	--	-//-
CSA009850	2685.41	11489.7	-2.0971	0.00034557	0.0030499	--	sp|P19446|MDHG_CITLA Malate dehydrogenase, glyoxysomal OS=Citrullus lanatus PE=1 SV=1//0
CSA009860	8.20673	40.118	-2.2894	0.00066171	0.0052467	--	sp|Q07423|HEX6_RICCO Hexose carrier protein HEX6 OS=Ricinus communis GN=HEX6 PE=2 SV=1//0
CSA009876	51.0855	5.9661	3.0981	1.7407e-06	3.1767e-05	--	sp|P10978|POLX_TOBAC Retrovirus-related Pol polyprotein from transposon TNT 1-94 OS=Nicotiana tabacum PE=2 SV=1//9.85675e-143
CSA009878	1.58192	83.1701	-5.7163	0.00023854	0.0022317	--	sp|Q5XF57|Y5576_ARATH Probable receptor-like serine/threonine-protein kinase At5g57670 OS=Arabidopsis thaliana GN=At5g57670 PE=2 SV=1//0
CSA009881	3.15399	42.1912	-3.7417	7.9871e-07	1.5778e-05	--	-//-
CSA009882	2894.45	203.261	3.8319	4.9247e-08	1.3375e-06	--	sp|Q9LMA8|TI10A_ARATH Protein TIFY 10A OS=Arabidopsis thaliana GN=TIFY10A PE=1 SV=1//1.90532e-28
CSA009884	11.7612	197.249	-4.0679	3.301e-07	7.2608e-06	--	sp|Q0WRY5|CDL1_ARATH Serine/threonine-protein kinase CDL1 OS=Arabidopsis thaliana GN=CDL1 PE=1 SV=1//3.71839e-86
CSA009885	94.1294	247.558	-1.395	0.00055526	0.0045388	--	-//-
CSA009886	3.98183	66.1103	-4.0534	0.0013874	0.0096451	--	sp|O04523|TBL27_ARATH Protein ALTERED XYLOGLUCAN 4 OS=Arabidopsis thaliana GN=AXY4 PE=1 SV=1//5.08883e-167
CSA009888	69.4156	26.039	1.4146	0.0047428	0.025695	--	sp|Q9SSG3|HIPL1_ARATH HIPL1 protein OS=Arabidopsis thaliana GN=HIPL1 PE=1 SV=2//0
CSA009892	176.639	43.7201	2.0144	3.6108e-06	6.0644e-05	--	sp|O80630|DIR9_ARATH Dirigent protein 9 OS=Arabidopsis thaliana GN=DIR9 PE=2 SV=1//7.19205e-78
CSA009903	1.41408	21.2457	-3.9092	0.0022279	0.014095	--	sp|Q3E8Z8|PME28_ARATH Putative pectinesterase/pectinesterase inhibitor 28 OS=Arabidopsis thaliana GN=PME28 PE=2 SV=1//0
CSA009918	2726.16	1174.37	1.215	0.00050745	0.0042007	--	sp|O81153|PSB3B_ARATH Proteasome subunit beta type-3-B OS=Arabidopsis thaliana GN=PBC2 PE=1 SV=1//1.60619e-136
CSA009919	17053.8	1155.28	3.8838	1.1994e-12	8.0559e-11	--	sp|Q39013|NAC2_ARATH NAC domain-containing protein 2 OS=Arabidopsis thaliana GN=NAC002 PE=2 SV=2//3.16425e-141
CSA009926	88.8173	373.109	-2.0707	9.6124e-05	0.001035	--	sp|Q6NMR9|GDL84_ARATH GDSL esterase/lipase At5g45920 OS=Arabidopsis thaliana GN=At5g45920 PE=2 SV=1//1.61743e-104
CSA009936	7.64732	45.9065	-2.5857	0.00037308	0.0032578	--	sp|Q9LK43|TMK4_ARATH Receptor-like kinase TMK4 OS=Arabidopsis thaliana GN=TMK4 PE=1 SV=1//0
CSA009939	110.906	8.72307	3.6684	1.6979e-06	3.109e-05	--	sp|Q9ZSK5|ZOG_PHALU Zeatin O-glucosyltransferase OS=Phaseolus lunatus GN=ZOG1 PE=2 SV=1//8.5076e-158
CSA009940	267.929	6.70453	5.3206	5.5978e-25	2.0518e-22	--	sp|Q9ZSK5|ZOG_PHALU Zeatin O-glucosyltransferase OS=Phaseolus lunatus GN=ZOG1 PE=2 SV=1//1.26007e-161
CSA009955	493.419	159.112	1.6328	0.00030333	0.0027296	--	sp|C0LGH3|Y5614_ARATH Probable LRR receptor-like serine/threonine-protein kinase At1g56140 OS=Arabidopsis thaliana GN=At1g56140 PE=2 SV=2//2.02442e-80
CSA009956	1782.98	551.169	1.6937	1.45e-06	2.7062e-05	--	sp|O04209|CLC2_ARATH Clathrin light chain 2 OS=Arabidopsis thaliana GN=CLC2 PE=1 SV=1//6.83633e-54
CSA009960	6577.36	1737.01	1.9209	5.3426e-08	1.4364e-06	--	sp|Q05609|CTR1_ARATH Serine/threonine-protein kinase CTR1 OS=Arabidopsis thaliana GN=CTR1 PE=1 SV=1//5.41611e-49
CSA009964	439.274	101.792	2.1095	7.5856e-08	1.9694e-06	--	sp|Q6DJ87|CC90B_XENTR Coiled-coil domain-containing protein 90B, mitochondrial OS=Xenopus tropicalis GN=ccdc90b PE=2 SV=2//3.71695e-18
CSA009966	11236	52436.1	-2.2224	0.000393	0.0034044	--	sp|Q944G9|ALFC2_ARATH Probable fructose-bisphosphate aldolase 2, chloroplastic OS=Arabidopsis thaliana GN=FBA2 PE=1 SV=2//0
CSA009970	44.5737	592.118	-3.7316	5.6349e-08	1.5051e-06	--	sp|Q8S950|NACK1_TOBAC Kinesin-like protein NACK1 OS=Nicotiana tabacum GN=NACK1 PE=1 SV=1//1.05243e-149
CSA009971	80.0586	1157.28	-3.8535	1.3643e-08	4.2055e-07	--	sp|Q8LNZ2|NACK2_ARATH Kinesin-like protein NACK2 OS=Arabidopsis thaliana GN=NACK2 PE=1 SV=1//1.05954e-28
CSA009976	140.578	11.7196	3.5844	0.0059609	0.030667	--	sp|Q9LSQ4|GH36_ARATH Indole-3-acetic acid-amido synthetase GH3.6 OS=Arabidopsis thaliana GN=GH3.6 PE=1 SV=1//0
CSA009978	153.78	36.5489	2.073	0.00025579	0.0023642	--	sp|Q9LSQ6|PBP1_ARATH Calcium-binding protein PBP1 OS=Arabidopsis thaliana GN=PBP1 PE=1 SV=1//1.13041e-41
CSA009979	639.972	274.752	1.2199	0.00079881	0.0061179	--	sp|Q9ZR07|FRDA_ARATH Frataxin, mitochondrial OS=Arabidopsis thaliana GN=FH PE=1 SV=2//1.02732e-50
CSA009980	190.652	1.32946	7.164	1.3748e-06	2.5779e-05	--	-//-
CSA009987	895.291	310.334	1.5285	2.4497e-05	0.00031942	--	sp|Q940Q3|ZTP29_ARATH Zinc transporter ZTP29 OS=Arabidopsis thaliana GN=ZTP29 PE=2 SV=1//2.43735e-120
CSA009988	91.6706	29.9543	1.6137	0.00086011	0.0065052	--	sp|Q6I581|GH35_ORYSJ Probable indole-3-acetic acid-amido synthetase GH3.5 OS=Oryza sativa subsp. japonica GN=GH3.5 PE=2 SV=1//0
CSA009989	69.2938	26.0593	1.4109	0.0055126	0.0289	--	sp|Q6I581|GH35_ORYSJ Probable indole-3-acetic acid-amido synthetase GH3.5 OS=Oryza sativa subsp. japonica GN=GH3.5 PE=2 SV=1//0
CSA009993	27.0393	170.585	-2.6574	0.0024517	0.015192	--	sp|O49545|BAME1_ARATH Leucine-rich repeat receptor-like serine/threonine-protein kinase BAM1 OS=Arabidopsis thaliana GN=BAM1 PE=1 SV=1//0
CSA010001	651.836	90.8499	2.843	1.2456e-07	3.0455e-06	--	sp|F8WKW0|UGT1_GARJA Crocetin glucosyltransferase, chloroplastic OS=Gardenia jasminoides GN=UGT75L6 PE=1 SV=1//5.18394e-74
CSA010004	184.369	61.0458	1.5946	0.007567	0.037067	--	sp|Q9ZPE7|EXO_ARATH Protein EXORDIUM OS=Arabidopsis thaliana GN=EXO PE=2 SV=1//1.1009e-138
CSA010005	6544.78	2592.68	1.3359	0.00013433	0.0013765	--	sp|F4HQD4|HSP7P_ARATH Heat shock 70 kDa protein 15 OS=Arabidopsis thaliana GN=HSP70-15 PE=1 SV=1//0
CSA010009	601.025	2087.07	-1.796	7.211e-07	1.4434e-05	--	sp|P16180|RR17_ARATH 30S ribosomal protein S17, chloroplastic OS=Arabidopsis thaliana GN=RPS17 PE=1 SV=1//4.9371e-39
CSA010010	511.09	1803.26	-1.819	5.4955e-07	1.1409e-05	--	sp|Q9M812|CUT1C_ARATH Protein CURVATURE THYLAKOID 1C, chloroplastic OS=Arabidopsis thaliana GN=CURT1C PE=1 SV=1//1.4444e-16
CSA010020	34.8606	3.04919	3.5151	8.4127e-06	0.0001276	--	sp|Q9XEX2|PRX2B_ARATH Peroxiredoxin-2B OS=Arabidopsis thaliana GN=PRXIIB PE=1 SV=1//8.50504e-42
CSA010050	585.141	1899.99	-1.6991	2.5217e-06	4.3996e-05	--	sp|O23614|CTPA2_ARATH Carboxyl-terminal-processing peptidase 2, chloroplastic OS=Arabidopsis thaliana GN=CTPA2 PE=1 SV=1//0
CSA010061	111.502	724.771	-2.7005	3.8445e-12	2.3453e-10	--	sp|C0LGH8|Y1634_ARATH Probable LRR receptor-like serine/threonine-protein kinase At1g63430 OS=Arabidopsis thaliana GN=At1g63430 PE=2 SV=1//0
CSA010064	33.0096	202.77	-2.6189	0.0042032	0.023304	--	sp|Q56YU0|AL2C4_ARATH Aldehyde dehydrogenase family 2 member C4 OS=Arabidopsis thaliana GN=ALDH2C4 PE=1 SV=2//0
CSA010065	1836.09	309.14	2.5703	3.7492e-12	2.2935e-10	--	sp|Q8GT74|NIP2_ARATH NEP1-interacting protein 2 OS=Arabidopsis thaliana GN=NIP2 PE=1 SV=1//6.61609e-121
CSA010067	50.8259	13.1616	1.9492	0.0012583	0.0089079	--	-//-
CSA010080	787.237	346.958	1.182	0.00097803	0.0072426	--	sp|A2YQ56|LONM_ORYSI Lon protease homolog, mitochondrial OS=Oryza sativa subsp. indica GN=OsI_27415 PE=2 SV=1//2.12447e-132
CSA010082	188.817	51.159	1.8839	0.00067787	0.0053476	--	sp|F4I9E1|NFD4_ARATH Protein NUCLEAR FUSION DEFECTIVE 4 OS=Arabidopsis thaliana GN=NFD4 PE=3 SV=1//0
CSA010084	46.6115	134.502	-1.5289	0.00044777	0.0037923	--	-//-
CSA010097	188.668	48.285	1.9662	0.00073909	0.0057402	--	sp|Q5T1Q4|S35F1_HUMAN Solute carrier family 35 member F1 OS=Homo sapiens GN=SLC35F1 PE=2 SV=2//1.0846e-21
CSA010098	56.7521	14.857	1.9335	0.00072766	0.0056665	--	-//-
CSA010100	370.306	99.2539	1.8995	1.8004e-06	3.2733e-05	--	sp|Q9LZD8|U89A2_ARATH UDP-glycosyltransferase 89A2 OS=Arabidopsis thaliana GN=UGT89A2 PE=2 SV=1//1.54119e-153
CSA010106	804.4	368.22	1.1273	0.0016838	0.011224	--	sp|Q9ZQG9|E1314_ARATH Glucan endo-1,3-beta-glucosidase 14 OS=Arabidopsis thaliana GN=At2g27500 PE=1 SV=2//1.22547e-169
CSA010109	200.647	742.41	-1.8876	5.3293e-07	1.1111e-05	--	sp|Q6NMR8|FAF3_ARATH Protein FANTASTIC FOUR 3 OS=Arabidopsis thaliana GN=FAF3 PE=2 SV=1//2.23516e-07
CSA010123	714.485	1630.39	-1.1902	0.0010967	0.0079447	--	sp|Q9Y7K5|YGI3_SCHPO Uncharacterized WD repeat-containing protein C2A9.03 OS=Schizosaccharomyces pombe (strain 972 / ATCC 24843) GN=SPBC2A9.03 PE=3 SV=2//1.02149e-38
CSA010129	674.128	2095.34	-1.6361	2.2607e-05	0.00029772	--	sp|Q8H0M1|QORH_SPIOL Quinone-oxidoreductase homolog, chloroplastic OS=Spinacia oleracea GN=QOR PE=1 SV=1//5.74325e-135
CSA010131	117.279	1024.76	-3.1273	4.5147e-05	0.00054143	--	sp|Q9ZTX9|ARFD_ARATH Auxin response factor 4 OS=Arabidopsis thaliana GN=ARF4 PE=1 SV=1//0
CSA010140	25.6802	1398.46	-5.767	4.7825e-05	0.00056948	--	sp|O82632|GATA9_ARATH GATA transcription factor 9 OS=Arabidopsis thaliana GN=GATA9 PE=2 SV=1//7.6198e-35
CSA010141	114.478	741.002	-2.6944	3.2095e-07	7.0702e-06	--	sp|Q653H7|ARFR_ORYSJ Auxin response factor 18 OS=Oryza sativa subsp. japonica GN=ARF18 PE=2 SV=1//0
CSA010142	381.92	155.555	1.2958	0.00074064	0.0057502	--	-//-
CSA010143	3864.79	1918.52	1.0104	0.0032648	0.019095	--	sp|Q9FGZ9|UBL5_ARATH Ubiquitin-like protein 5 OS=Arabidopsis thaliana GN=UBL5 PE=3 SV=1//2.03078e-45
CSA010147	21.0826	74.2002	-1.8154	0.0005225	0.0043097	--	sp|F4J284|NU93B_ARATH Nuclear pore complex protein NUP93B OS=Arabidopsis thaliana GN=NUP93B PE=1 SV=1//2.29117e-16
CSA010148	4.39178	76.7604	-4.1275	4.654e-08	1.2703e-06	--	-//-
CSA010152	8.28944	37.1591	-2.1644	0.0013182	0.0092553	--	sp|O24160|TGA21_TOBAC TGACG-sequence-specific DNA-binding protein TGA-2.1 OS=Nicotiana tabacum GN=TGA21 PE=1 SV=1//2.17758e-73
CSA010158	68.3643	213.224	-1.6411	5.1006e-05	0.00060159	--	sp|Q9ASW1|B3GTG_ARATH Probable beta-1,3-galactosyltransferase 16 OS=Arabidopsis thaliana GN=B3GALT16 PE=2 SV=1//0
CSA010167	371.036	809.214	-1.125	0.0017008	0.011307	--	sp|Q96PM5|ZN363_HUMAN RING finger and CHY zinc finger domain-containing protein 1 OS=Homo sapiens GN=RCHY1 PE=1 SV=1//3.62854e-62
CSA010176	362.822	108.231	1.7451	8.4511e-06	0.00012803	--	-//-
CSA010194	350.448	117.192	1.5803	6.8224e-05	0.00077331	--	-//-
CSA010196	249.224	93.7136	1.4111	0.00051345	0.0042439	--	-//-
CSA010211	379.143	134.016	1.5003	0.00030679	0.0027539	--	sp|A6P6W1|CASL2_CANSA Cannabidiolic acid synthase-like 2 OS=Cannabis sativa GN=CBDAS3 PE=2 SV=1//6.38137e-152
CSA010212	242.464	617.64	-1.349	0.0013449	0.0094081	--	sp|O48916|FAH1_ARATH Fatty acid 2-hydroxylase 1 OS=Arabidopsis thaliana GN=FAH1 PE=1 SV=1//2.59166e-38
CSA010215	884.014	252.406	1.8083	6.829e-07	1.3783e-05	--	-//-
CSA010217	8.82116	129.093	-3.8713	6.9068e-07	1.3908e-05	--	sp|Q9SGP2|HSL1_ARATH Receptor-like protein kinase HSL1 OS=Arabidopsis thaliana GN=HSL1 PE=2 SV=1//9.31783e-07
CSA010218	0	8.84025	#NAME?	0.0021462	0.013668	--	sp|Q9SGP2|HSL1_ARATH Receptor-like protein kinase HSL1 OS=Arabidopsis thaliana GN=HSL1 PE=2 SV=1//1.47265e-08
CSA010221	55.2996	12.5561	2.1389	0.00028591	0.0025969	--	sp|Q7XBH4|MYB4_ORYSJ Myb-related protein Myb4 OS=Oryza sativa subsp. japonica GN=MYB4 PE=2 SV=2//4.73153e-57
CSA010225	0	9.16865	#NAME?	0.0016995	0.0113	--	sp|Q8VZF6|EDR2L_ARATH Protein ENHANCED DISEASE RESISTANCE 2-like OS=Arabidopsis thaliana GN=EDR2L PE=2 SV=1//3.41525e-58
CSA010238	189.151	689.51	-1.866	4.1915e-06	6.9146e-05	--	sp|P39211|XYLB_BACSU Xylulose kinase OS=Bacillus subtilis (strain 168) GN=xylB PE=3 SV=2//4.03313e-06
CSA010245	0.35352	16.6419	-5.5569	5.652e-05	0.00065635	--	sp|F4IXE7|IDM1_ARATH Increased DNA methylation 1 OS=Arabidopsis thaliana GN=IDM1 PE=1 SV=1//1.42732e-79
CSA010249	8.9603	33.8867	-1.9191	0.0044244	0.024274	--	sp|P49078|ASNS1_ARATH Asparagine synthetase [glutamine-hydrolyzing] 1 OS=Arabidopsis thaliana GN=ASN1 PE=2 SV=2//6.63694e-146
CSA010254	136.542	0.705534	7.5964	6.5037e-24	2.0706e-21	--	sp|P0C5E2|Y1839_ARATH Probable serine/threonine-protein kinase At1g18390 OS=Arabidopsis thaliana GN=At1g18390 PE=2 SV=2//1.84718e-19
CSA010255	202.446	558.597	-1.4643	0.00077911	0.0060029	--	sp|Q8LDI5|CXXS1_ARATH Thioredoxin-like protein CXXS1 OS=Arabidopsis thaliana GN=CXXS1 PE=2 SV=2//7.59788e-40
CSA010259	337.095	149.234	1.1756	0.0025635	0.015746	--	-//-
CSA010267	5.06123	31.0698	-2.618	0.00058325	0.0047302	--	-//-
CSA010273	7.82452	0	Inf	0.0047236	0.025625	--	sp|Q09851|AYR1_SCHPO NADPH-dependent 1-acyldihydroxyacetone phosphate reductase OS=Schizosaccharomyces pombe (strain 972 / ATCC 24843) GN=ayr1 PE=3 SV=2//5.83733e-25
CSA010279	86.6461	215.233	-1.3127	0.0052416	0.027744	--	sp|P21616|AVP_VIGRR Pyrophosphate-energized vacuolar membrane proton pump OS=Vigna radiata var. radiata PE=1 SV=4//6.61308e-50
CSA010280	172.494	378.955	-1.1355	0.0027044	0.016435	--	sp|Q06572|AVP_HORVU Pyrophosphate-energized vacuolar membrane proton pump OS=Hordeum vulgare PE=2 SV=2//8.11006e-149
CSA010281	67.3033	154.981	-1.2033	0.0062991	0.032072	--	sp|P31414|AVP1_ARATH Pyrophosphate-energized vacuolar membrane proton pump 1 OS=Arabidopsis thaliana GN=AVP1 PE=1 SV=1//3.85508e-75
CSA010288	47.1813	462.438	-3.293	0.0034618	0.019986	--	-//-
CSA010296	28.5828	680.748	-4.5739	2.9623e-10	1.2593e-08	--	sp|Q9SLN1|FPP7_ARATH Filament-like plant protein 7 OS=Arabidopsis thaliana GN=FPP7 PE=3 SV=2//2.20236e-147
CSA010299	183.226	69.709	1.3942	0.00085685	0.006485	--	sp|Q8C0K5|GDC_MOUSE Graves disease carrier protein homolog OS=Mus musculus GN=Slc25a16 PE=2 SV=1//5.25045e-07
CSA010300	345.174	118.357	1.5442	9.0274e-05	0.00098143	--	sp|O04619|ADNT1_ARATH Mitochondrial adenine nucleotide transporter ADNT1 OS=Arabidopsis thaliana GN=ADNT1 PE=2 SV=1//1.31654e-15
CSA010302	389.442	1397.49	-1.8434	0.00013623	0.0013912	--	-//-
CSA010305	11.1834	45.3398	-2.0194	0.00082902	0.0063061	--	sp|Q9ZUN3|KEA4_ARATH K(+) efflux antiporter 4 OS=Arabidopsis thaliana GN=KEA4 PE=2 SV=2//0
CSA010309	1.24674	519.031	-8.7015	0.0011161	0.0080561	--	-//-
CSA010315	2944.2	129.862	4.5028	3.5281e-29	1.9479e-26	--	-//-
CSA010316	255.365	124.712	1.034	0.0078528	0.038121	--	sp|Q42484|RPS2_ARATH Disease resistance protein RPS2 OS=Arabidopsis thaliana GN=RPS2 PE=1 SV=1//3.92136e-55
CSA010328	4097.52	902.266	2.1831	8.3844e-08	2.1575e-06	--	sp|Q9LNQ4|ALA4_ARATH Probable phospholipid-transporting ATPase 4 OS=Arabidopsis thaliana GN=ALA4 PE=3 SV=2//0
CSA010340	11733	5298.42	1.1469	0.0011279	0.0081221	--	sp|O82089|CCH_ARATH Copper transport protein CCH OS=Arabidopsis thaliana GN=CCH PE=1 SV=1//2.34015e-34
CSA010354	21.1846	55.0303	-1.3772	0.0095115	0.044255	--	sp|Q5ZJQ7|SSU72_CHICK RNA polymerase II subunit A C-terminal domain phosphatase SSU72 OS=Gallus gallus GN=SSU72 PE=2 SV=1//8.74664e-08
CSA010355	821.489	1878.53	-1.1933	0.002562	0.015741	--	sp|Q8L7V3|PMTQ_ARATH Probable methyltransferase PMT26 OS=Arabidopsis thaliana GN=At5g64030 PE=2 SV=1//0
CSA010362	68.5248	262.759	-1.939	2.2648e-06	3.9945e-05	--	sp|Q94EJ2|HDA8_ARATH Histone deacetylase 8 OS=Arabidopsis thaliana GN=HDA8 PE=2 SV=1//0
CSA010363	64.3521	25.5203	1.3343	0.010165	0.046668	--	sp|Q8W595|SUVR4_ARATH Histone-lysine N-methyltransferase SUVR4 OS=Arabidopsis thaliana GN=SUVR4 PE=1 SV=2//6.15949e-122
CSA010364	27.5015	5.92201	2.2154	0.0038818	0.021849	--	sp|Q8W595|SUVR4_ARATH Histone-lysine N-methyltransferase SUVR4 OS=Arabidopsis thaliana GN=SUVR4 PE=1 SV=2//2.18685e-110
CSA010367	147.057	524.24	-1.8338	1.1099e-05	0.00016229	--	sp|Q96H78|S2544_HUMAN Solute carrier family 25 member 44 OS=Homo sapiens GN=SLC25A44 PE=2 SV=1//2.06475e-22
CSA010370	12.0861	42.4808	-1.8135	0.0032651	0.019095	--	sp|O80366|ARR9_ARATH Two-component response regulator ARR9 OS=Arabidopsis thaliana GN=ARR9 PE=1 SV=1//2.5564e-50
CSA010372	13.8156	63.2151	-2.194	8.5019e-05	0.00093243	--	-//-
CSA010374	0	8.01887	#NAME?	0.003634	0.020762	--	sp|Q8L7A9|AP4E_ARATH AP-4 complex subunit epsilon OS=Arabidopsis thaliana GN=At1g31730 PE=1 SV=1//9.32985e-07
CSA010381	2193.38	123.738	4.1478	8.3065e-26	3.2062e-23	--	sp|Q8GV43|PLCD6_ARATH Phosphoinositide phospholipase C 6 OS=Arabidopsis thaliana GN=PLC6 PE=2 SV=2//0
CSA010382	677.725	2292.66	-1.7583	3.0842e-05	0.00038947	--	-//-
CSA010384	755.627	326.67	1.2098	0.001594	0.010748	--	sp|Q922Q1|MARC2_MOUSE Mitochondrial amidoxime reducing component 2 OS=Mus musculus GN=Marc2 PE=1 SV=1//1.37096e-21
CSA010386	4154.67	1507.14	1.4629	3.1494e-05	0.00039667	--	sp|Q94JV4|SUI12_ARATH Protein translation factor SUI1 homolog 2 OS=Arabidopsis thaliana GN=At1g54290 PE=3 SV=1//2.47437e-68
CSA010393	2730.95	873.048	1.6453	3.4663e-06	5.8329e-05	--	sp|P52427|PSA4_SPIOL Proteasome subunit alpha type-4 OS=Spinacia oleracea GN=PAC1 PE=2 SV=1//2.10166e-145
CSA010398	88.5166	234.428	-1.4051	0.0011852	0.0084799	--	sp|Q5XF09|PT311_ARATH Probable sugar phosphate/phosphate translocator At3g11320 OS=Arabidopsis thaliana GN=At3g11320 PE=2 SV=1//1.1688e-170
CSA010414	30.0885	90.338	-1.5861	0.0010759	0.0078211	--	-//-
CSA010416	271.915	81.63	1.736	1.1808e-05	0.00017081	--	-//-
CSA010422	12.551	42.7776	-1.7691	0.003551	0.020401	--	-//-
CSA010423	111.972	260.203	-1.2165	0.0019825	0.012807	--	-//-
CSA010436	44.1777	557.917	-3.6587	4.0686e-08	1.1265e-06	--	sp|Q8H965|NPC6_ARATH Non-specific phospholipase C6 OS=Arabidopsis thaliana GN=NPC6 PE=2 SV=1//0
CSA010460	183.011	42.3623	2.1111	8.2076e-07	1.6169e-05	--	sp|Q39202|RLK1_ARATH G-type lectin S-receptor-like serine/threonine-protein kinase RLK1 OS=Arabidopsis thaliana GN=RLK1 PE=2 SV=2//4.43136e-146
CSA010461	21.6862	4.0634	2.416	0.0047119	0.025591	--	sp|Q39202|RLK1_ARATH G-type lectin S-receptor-like serine/threonine-protein kinase RLK1 OS=Arabidopsis thaliana GN=RLK1 PE=2 SV=2//5.13666e-161
CSA010462	313.988	51.0597	2.6205	1.7601e-05	0.00024104	--	sp|Q38908|XTH30_ARATH Probable xyloglucan endotransglucosylase/hydrolase protein 30 OS=Arabidopsis thaliana GN=XTH30 PE=2 SV=2//1.6081e-145
CSA010463	211.327	765.511	-1.8569	7.267e-07	1.452e-05	--	sp|O23403|PPD1_ARATH PsbP domain-containing protein 1, chloroplastic OS=Arabidopsis thaliana GN=PPD1 PE=1 SV=1//3.94426e-105
CSA010477	121.429	49.1826	1.3039	0.0031711	0.018654	--	sp|Q5SNL7|FAN1_ORYSJ Fanconi-associated nuclease 1 homolog OS=Oryza sativa subsp. japonica GN=Os06g0171800 PE=3 SV=1//1.75694e-65
CSA010480	11.5553	39.7949	-1.784	0.004494	0.024585	--	sp|Q8GZ92|BRXL4_ARATH Protein Brevis radix-like 4 OS=Arabidopsis thaliana GN=BRXL4 PE=2 SV=1//1.08936e-78
CSA010483	182.264	74.422	1.2922	0.001748	0.011564	--	sp|C7G304|GOLS2_SOLLC Galactinol synthase 2 OS=Solanum lycopersicum GN=GOLS2 PE=2 SV=1//4.85203e-125
CSA010498	55.9346	288.147	-2.365	1.7899e-06	3.257e-05	--	sp|Q0WRB2|P2C73_ARATH Probable protein phosphatase 2C 73 OS=Arabidopsis thaliana GN=PPC6-7 PE=2 SV=1//0
CSA010501	2.59549	35.6387	-3.7794	0.010573	0.048162	--	sp|Q9FJ21|PME58_ARATH Probable pectinesterase/pectinesterase inhibitor 58 OS=Arabidopsis thaliana GN=PME58 PE=2 SV=1//0
CSA010516	1258.87	30.7974	5.3532	9.0587e-09	2.8882e-07	--	sp|Q9LMA1|FMO1_ARATH Probable flavin-containing monooxygenase 1 OS=Arabidopsis thaliana GN=FMO1 PE=2 SV=1//0
CSA010518	306.178	742.218	-1.2775	0.002189	0.013892	--	sp|Q9MB35|PERQ_SEDLI Peroxiredoxin Q, chloroplastic (Fragment) OS=Sedum lineare GN=PRXQ PE=1 SV=1//2.47679e-37
CSA010519	648	2388.18	-1.8818	1.4657e-05	0.00020559	--	sp|Q6QPJ6|PRXQ_POPJC Peroxiredoxin Q, chloroplastic OS=Populus jackii GN=PRXQ PE=1 SV=1//2.57955e-94
CSA010520	3.86148	160.509	-5.3774	3.0059e-15	2.8752e-13	--	sp|O81211|RBOHE_ARATH Respiratory burst oxidase homolog protein E OS=Arabidopsis thaliana GN=RBOHE PE=2 SV=2//0
CSA010521	181.101	732.215	-2.0155	2.2012e-06	3.9045e-05	--	sp|Q9FM68|BAM4_ARATH Inactive beta-amylase 4, chloroplastic OS=Arabidopsis thaliana GN=BAM4 PE=2 SV=1//0
CSA010531	1203.4	315.21	1.9327	1.6581e-06	3.0438e-05	--	sp|H2DH21|C7A29_PANGI Cytochrome P450 CYP72A219 OS=Panax ginseng PE=2 SV=1//3.25069e-21
CSA010532	339.587	65.0341	2.3845	6.3066e-05	0.00072312	--	sp|H2DH21|C7A29_PANGI Cytochrome P450 CYP72A219 OS=Panax ginseng PE=2 SV=1//4.77374e-160
CSA010535	3.80555	102.083	-4.7455	1.866e-14	1.6376e-12	--	sp|P0C2F6|RNHX1_ARATH Putative ribonuclease H protein At1g65750 OS=Arabidopsis thaliana GN=At1g65750 PE=3 SV=1//2.58649e-21
CSA010537	49.0213	169.956	-1.7937	0.0070593	0.035057	--	sp|Q0JXE7|BPE_ARATH Transcription factor BPE OS=Arabidopsis thaliana GN=BPE PE=2 SV=1//3.71182e-63
CSA010551	0	7.93068	#NAME?	0.0037485	0.021256	--	-//-
CSA010552	0.986288	18.8777	-4.2585	0.00013224	0.0013572	--	sp|Q9LX14|UFC_ARATH Protein UPSTREAM OF FLC OS=Arabidopsis thaliana GN=UFC PE=2 SV=1//9.07965e-79
CSA010555	1483.47	569.837	1.3804	0.00010533	0.0011208	--	sp|Q93YW5|P2C58_ARATH Probable protein phosphatase 2C 58 OS=Arabidopsis thaliana GN=At4g28400 PE=2 SV=1//4.72176e-142
CSA010571	1934.41	963.734	1.0052	0.0038358	0.021652	--	-//-
CSA010579	866.256	1949.66	-1.1704	0.00078372	0.0060331	--	sp|Q8C8N2|SCAI_MOUSE Protein SCAI OS=Mus musculus GN=Scai PE=1 SV=2//9.13336e-67
CSA010594	200.584	536.678	-1.4199	0.0001298	0.0013356	--	sp|Q6VBB2|HFA2B_ORYSJ Heat stress transcription factor A-2b OS=Oryza sativa subsp. japonica GN=HSFA2B PE=2 SV=1//8.49122e-107
CSA010596	397.707	795.661	-1.0004	0.0063722	0.032344	--	sp|O80885|ARASP_ARATH Membrane metalloprotease ARASP, chloroplastic OS=Arabidopsis thaliana GN=ARASP PE=2 SV=1//0
CSA010600	878.029	7.64308	6.844	1.5454e-09	5.6977e-08	--	sp|A6P6W0|CASL1_CANSA Cannabidiolic acid synthase-like 1 OS=Cannabis sativa GN=CBDAS2 PE=2 SV=1//1.54848e-112
CSA010604	0.949152	68.1144	-6.1652	3.1308e-14	2.6619e-12	--	-//-
CSA010605	4.7641	78.4071	-4.0407	8.9354e-11	4.1359e-09	--	sp|Q9FY93|NAC83_ARATH NAC domain-containing protein 83 OS=Arabidopsis thaliana GN=NAC083 PE=1 SV=1//2.24481e-49
CSA010607	14.681	0.664728	4.465	0.0007727	0.0059651	--	-//-
CSA010609	253.62	15.8126	4.0035	4.162e-08	1.1482e-06	--	sp|Q9SLN5|MAP1A_ARATH Methionine aminopeptidase 1A OS=Arabidopsis thaliana GN=MAP1A PE=1 SV=1//8.83333e-11
CSA010610	1190.85	74.6194	3.9963	4.0805e-08	1.1286e-06	--	sp|Q9SLN5|MAP1A_ARATH Methionine aminopeptidase 1A OS=Arabidopsis thaliana GN=MAP1A PE=1 SV=1//2.90349e-75
CSA010616	1412.46	3434.88	-1.282	0.00024383	0.0022715	--	sp|Q949P2|COPDA_ARATH Probable cytosolic oligopeptidase A OS=Arabidopsis thaliana GN=CYOP PE=1 SV=1//0
CSA010617	555.167	5723.18	-3.3658	1.6118e-06	2.9713e-05	--	sp|P50433|GLYM_SOLTU Serine hydroxymethyltransferase, mitochondrial OS=Solanum tuberosum PE=2 SV=1//0
CSA010621	33.5795	105.877	-1.6567	0.00040892	0.0035158	--	sp|P59082|LFS_ALLCE Lachrymatory-factor synthase OS=Allium cepa GN=LFS PE=1 SV=1//1.13212e-11
CSA010645	24.8416	349.601	-3.8149	1.5308e-07	3.6606e-06	--	sp|Q08298|RD22_ARATH Dehydration-responsive protein RD22 OS=Arabidopsis thaliana GN=RD22 PE=2 SV=1//1.62199e-87
CSA010657	425.355	10.9147	5.2843	9.3634e-28	4.3914e-25	--	sp|Q84XG9|ILL1_ORYSI IAA-amino acid hydrolase ILR1-like 1 OS=Oryza sativa subsp. indica GN=ILL1 PE=2 SV=1//1.68034e-162
CSA010659	26.5363	205.207	-2.951	2.2409e-07	5.1389e-06	--	sp|Q6NLW5|XRI1_ARATH Protein XRI1 OS=Arabidopsis thaliana GN=XRI1 PE=1 SV=2//2.25176e-85
CSA010663	3705.64	376.171	3.3003	1.2945e-18	1.9951e-16	--	sp|Q9SN23|LBD38_ARATH LOB domain-containing protein 38 OS=Arabidopsis thaliana GN=LBD38 PE=2 SV=1//2.03715e-66
CSA010664	4225.41	12755.1	-1.5939	4.8e-05	0.0005714	--	sp|Q43517|FER1_SOLLC Ferredoxin-1, chloroplastic OS=Solanum lycopersicum GN=SEND33 PE=2 SV=1//7.4095e-66
CSA010667	31.4669	135.646	-2.1079	0.0025729	0.015784	--	sp|Q9C958|SRK2B_ARATH Serine/threonine-protein kinase SRK2B OS=Arabidopsis thaliana GN=SRK2B PE=1 SV=1//3.05849e-179
CSA010672	3912.56	57.8637	6.0793	1.7428e-05	0.00023911	--	sp|Q93Y92|HBL2_GOSHI Non-symbiotic hemoglobin 2 OS=Gossypium hirsutum GN=HB2 PE=3 SV=1//3.28367e-88
CSA010673	3077.71	154.09	4.32	2.7484e-09	9.6596e-08	--	sp|Q6DST1|Y1465_ARATH Late embryogenesis abundant protein At1g64065 OS=Arabidopsis thaliana GN=At1g64065 PE=2 SV=1//4.48695e-09
CSA010678	2393.2	817.001	1.5505	1.1499e-05	0.00016707	--	sp|Q9LRA7|TPS9_ARATH Probable alpha,alpha-trehalose-phosphate synthase [UDP-forming] 9 OS=Arabidopsis thaliana GN=TPS9 PE=2 SV=1//0
CSA010681	384.915	2046.05	-2.4102	2.0081e-05	0.00026892	--	sp|Q9S720|PPD3_ARATH PsbP domain-containing protein 3, chloroplastic OS=Arabidopsis thaliana GN=PPD3 PE=1 SV=2//2.53362e-82
CSA010686	32.2097	7.76417	2.0526	0.0031574	0.0186	--	sp|Q9SX38|DRL4_ARATH Putative disease resistance protein At1g50180 OS=Arabidopsis thaliana GN=At1g50180 PE=3 SV=2//1.20226e-19
CSA010698	331.542	153.854	1.1076	0.0094632	0.04407	--	sp|Q8VYJ2|AHL1_ARATH AT-hook motif nuclear-localized protein 1 OS=Arabidopsis thaliana GN=AHL1 PE=1 SV=1//4.09051e-80
CSA010704	19.6788	621.452	-4.9809	4.4796e-13	3.1463e-11	--	sp|Q9LFE4|Y5673_ARATH WEB family protein At5g16730, chloroplastic OS=Arabidopsis thaliana GN=At5g16730 PE=1 SV=1//0
CSA010709	2986.42	1014.16	1.5581	0.0013564	0.0094723	--	sp|Q9ZSS6|THD1_ARATH Threonine dehydratase biosynthetic, chloroplastic OS=Arabidopsis thaliana GN=OMR1 PE=1 SV=1//0
CSA010710	372.945	154.698	1.2695	0.00065405	0.0051982	--	sp|F4KGY6|RVE1_ARATH Protein REVEILLE 1 OS=Arabidopsis thaliana GN=RVE1 PE=2 SV=1//2.44192e-57
CSA010715	221.432	568.033	-1.3591	0.00023613	0.0022125	--	sp|Q9LXR6|FB207_ARATH Putative F-box protein At3g58860 OS=Arabidopsis thaliana GN=At3g58860 PE=3 SV=1//4.33271e-42
CSA010717	11.3791	48.2429	-2.0839	0.00061887	0.0049666	--	-//-
CSA010725	19.1561	1.54336	3.6337	0.00066525	0.005268	--	-//-
CSA010727	94.8053	580.141	-2.6134	2.6924e-07	6.044e-06	--	sp|P47927|AP2_ARATH Floral homeotic protein APETALA 2 OS=Arabidopsis thaliana GN=AP2 PE=1 SV=1//6.52142e-87
CSA010741	610.452	117.559	2.3765	2.8267e-05	0.00036029	--	sp|Q9FKB5|KRP3_ARATH Cyclin-dependent kinase inhibitor 3 OS=Arabidopsis thaliana GN=KRP3 PE=1 SV=1//1.00747e-36
CSA010752	1690.38	622.993	1.4401	0.00077782	0.0059972	--	sp|Q42438|CDPK8_ARATH Calcium-dependent protein kinase 8 OS=Arabidopsis thaliana GN=CPK8 PE=1 SV=1//0
CSA010753	649.081	183.193	1.825	1.0896e-06	2.0909e-05	--	-//-
CSA010760	269.814	668.357	-1.3087	0.00033198	0.0029485	--	sp|Q9SMP0|NFYC1_ARATH Nuclear transcription factor Y subunit C-1 OS=Arabidopsis thaliana GN=NFYC1 PE=1 SV=1//1.35211e-100
CSA010767	39.2801	103.876	-1.403	0.0022079	0.013991	--	sp|P37116|NCPR_VIGRR NADPH--cytochrome P450 reductase OS=Vigna radiata var. radiata PE=1 SV=1//9.32856e-19
CSA010772	7.26698	39.5968	-2.446	0.00036749	0.0032161	--	-//-
CSA010778	3.58223	200.979	-5.81	2.3906e-24	8.0207e-22	--	sp|Q9M363|B561I_ARATH Cytochrome b561 and DOMON domain-containing protein At3g61750 OS=Arabidopsis thaliana GN=At3g61750 PE=3 SV=1//7.86925e-113
CSA010783	1215.68	2721.43	-1.1626	0.0091029	0.042757	--	sp|Q38827|IAA9_ARATH Auxin-responsive protein IAA9 OS=Arabidopsis thaliana GN=IAA9 PE=1 SV=1//1.71949e-124
CSA010784	172.568	386.953	-1.165	0.0058795	0.030362	--	-//-
CSA010785	9384.99	33889.3	-1.8524	1.869e-07	4.3663e-06	--	sp|P51118|GLNA1_VITVI Glutamine synthetase cytosolic isozyme 1 OS=Vitis vinifera GN=GS1-1 PE=2 SV=1//0
CSA010786	25.4551	152.913	-2.5867	0.000141	0.0014332	--	sp|Q8WXB1|MT21A_HUMAN Protein N-lysine methyltransferase METTL21A OS=Homo sapiens GN=METTL21A PE=1 SV=2//4.72737e-13
CSA010790	14275.2	3195.45	2.1594	1.6103e-08	4.8945e-07	--	sp|Q43075|SPE1_PEA Arginine decarboxylase OS=Pisum sativum PE=2 SV=1//0
CSA010793	522.346	233.899	1.1591	0.0020451	0.013137	--	sp|F8WKW1|UGT2_GARJA 7-deoxyloganetin glucosyltransferase OS=Gardenia jasminoides GN=UGT85A24 PE=1 SV=1//0
CSA010794	158.125	1623.92	-3.3603	5.7301e-18	8.1676e-16	--	-//-
CSA010813	892.982	1889.85	-1.0816	0.0026491	0.016169	--	sp|Q97I09|ISPH_CLOAB 4-hydroxy-3-methylbut-2-enyl diphosphate reductase OS=Clostridium acetobutylicum (strain ATCC 824 / DSM 792 / JCM 1419 / LMG 5710 / VKM B-1787) GN=ispH PE=3 SV=1//8.48719e-06
CSA010814	4.47545	23.3037	-2.3805	0.0039516	0.022158	--	sp|F4I214|TET10_ARATH Tetraspanin-10 OS=Arabidopsis thaliana GN=TET10 PE=2 SV=1//2.45417e-47
CSA010815	3.42379	126.325	-5.2054	9.6769e-05	0.0010409	--	sp|Q9M2E2|SDR1_ARATH (+)-neomenthol dehydrogenase OS=Arabidopsis thaliana GN=SDR1 PE=1 SV=1//7.93658e-93
CSA010816	1466.28	175.994	3.0586	0.0041835	0.023215	--	sp|Q8S8P5|WRK33_ARATH Probable WRKY transcription factor 33 OS=Arabidopsis thaliana GN=WRKY33 PE=1 SV=2//2.27458e-108
CSA010826	103.71	227.582	-1.1338	0.0045187	0.024692	--	sp|B3LFA3|NIPA2_ARATH Probable magnesium transporter NIPA2 OS=Arabidopsis thaliana GN=At4g13800 PE=2 SV=1//5.86192e-125
CSA010832	107.329	27.6435	1.957	3.8067e-05	0.000466	--	sp|Q9S7G7|MB3R1_ARATH Myb-related protein 3R-1 OS=Arabidopsis thaliana GN=MYB3R-1 PE=2 SV=1//3.16427e-72
CSA010833	1495.09	481.412	1.6349	7.9491e-06	0.00012144	--	sp|Q9ASQ5|CRCK3_ARATH Calmodulin-binding receptor-like cytoplasmic kinase 3 OS=Arabidopsis thaliana GN=CRCK3 PE=2 SV=1//0
CSA010834	182.638	64.8051	1.4948	0.00039474	0.0034161	--	sp|Q8L706|SYT5_ARATH Synaptotagmin-5 OS=Arabidopsis thaliana GN=SYT5 PE=2 SV=1//3.15964e-20
CSA010836	2583.23	1117.14	1.2094	0.00061816	0.0049636	--	sp|Q8L706|SYT5_ARATH Synaptotagmin-5 OS=Arabidopsis thaliana GN=SYT5 PE=2 SV=1//0
CSA010838	1254.77	550.456	1.1887	0.00065883	0.0052304	--	sp|P05477|HSP21_SOYBN 17.9 kDa class II heat shock protein OS=Glycine max GN=HSP17.9-D PE=3 SV=1//2.20373e-68
CSA010849	219.613	1351.45	-2.6215	4.8576e-12	2.8984e-10	--	sp|Q9LU21|PNSB3_ARATH Photosynthetic NDH subunit of subcomplex B 3, chloroplastic OS=Arabidopsis thaliana GN=PNSB3 PE=2 SV=1//2.90025e-64
CSA010850	49.4049	121.979	-1.3039	0.0032326	0.018936	--	-//-
CSA010862	6416.79	83349.4	-3.6992	1.708e-20	3.5815e-18	--	sp|Q9XF88|CB4B_ARATH Chlorophyll a-b binding protein CP29.2, chloroplastic OS=Arabidopsis thaliana GN=LHCB4.2 PE=1 SV=1//1.17535e-169
CSA010869	0	39.1177	#NAME?	2.8807e-11	1.461e-09	--	sp|Q64M78|OML4_ORYSJ Protein MEI2-like 4 OS=Oryza sativa subsp. japonica GN=ML4 PE=2 SV=1//2.12895e-13
CSA010870	700.572	314.3	1.1564	0.0059264	0.030544	--	sp|Q8L736|SKI11_ARATH F-box/kelch-repeat protein SKIP11 OS=Arabidopsis thaliana GN=SKIP11 PE=1 SV=2//0
[truncated: 4,839 more rows]
