# Supplementary material for: Identification of Tea Plant Purple Acid Phosphatase Genes and Their Expression Responses to Excess Iron
Source: Int J Mol Sci. 2019 Apr 21;20(8):1954. doi: 10.3390/ijms20081954 (PMC6515233; doi:10.3390/ijms20081954)
Supplement: Supplementary file 1 [file ijms-20-01954-s001.zip › Table S1.pdf]

Supplementary Table 2. Sequences of identified CsPAPs.

>CSA004804.1 CSA004804 Sc0000741:607594-608772(+)

MGAATPYSTFLRTQDESISTMKWISRDIEALGDKPSFVSHIGDISYARGYSWLWDTFFAQ  
IEPVASEVPYHVCIGNHEYDWP HQPWKPDWSYSVYGKDGGGECGVPYSLRFNMPGNSSEV  
TGTRAPATRNLYYSFDFGSVHFVYISTETNFLPGSSQYNFIKHDLSEVDRKKT PFV VVQG  
HRPMYTTSNENRDAPFRERLQEHLEPLFVKNKVTLALWGHVHRYERFCPMNNFTCGNMDL  
NGEDSEGFPVHIVIGMAGQDWQPIWEPRADHPNDPIFPQGRSLYRGGEFGYTRLVATKE  
KLTF SYVGNHDGEVHDTVEILASGHVLNGGGSGDDGSTASSTMMESTFSWYVKGASVLVL  
GAFVGYVIGYISHARRGAASGNNWTPVKNEEI\*

>CSA005153.1 CSA005153 Sc0002098:204581-207829(+)

MGFHVVTVIGLPLFLLSLVLAHAEIPTTLEGPFPVTVPLDNNFRGLATDLPDTPRVQ  
RKVTGFEPEQISVSLSSNHDSVWISWITGEFQIGNNIEPLNPETVRSVVYYRKS K SALTH  
KAKGDSL IYNQLYPFEG LQNYTSGIIHHVRLTGLKPNTVYYYQCGDPSLPAMSNVSYFKT  
MPVSGPRNYPKRIAVVGDGLTYNTTSTISHLMRNRPDVLLVGDVTYANLYLTNGTGSD  
CYSCSFPQTPIHETYQPRWDYWARFMQPLVSKVPIMVIEGNHDIEQQAGNLTFASYSSRF  
AFPSEESSESTLYYSFNAGGIHFIMLG GYIAYNKSADQYKWLERDLAKVDRK VTPWLVA  
TWHPPWYSSYKAHYREAECMKVAMEELLYKYGVDMVFNGHVHAYERSNRVYNYTLDPCGP  
VYITVGDGGNREKMAIPHADEPGNCPDPSTTPDGYMGGFCAYNFTSGPAAGKFCWDRQPD  
YSAYRETSFGHGILEVKNETHALWSWHRNQGMYNMAGDQIYIVRQPDRCVP GPKCSYWSG  
NTTSAGSIHLMTSALIGLGT RRQR TKFVLWDD\*

>CSA006013.1 CSA006013 xpSc0055840:7657-15883(+)

MTLSGLILLAILSGFNGATSHGDQQPLSRIAIQRAVFAFDDHAYIKASPPVLGLEQNSE  
WLTLEYSIPNPSIDDWIGVFSPANFSASTCPPENGRVFPPLLCTAPIKV RAYQYANYTNP  
EFKDNGKGSRLRLQLIKQRSDFSFALFSGGLTPKLVA VSNIVDFANPNAPVYPRLAQGKT  
WNEMTVTWTSGYGINEAEFPFEWGPKGGEQSRSPAGTVTFDRRSAPARTVGWRDPGFIHT  
SFLKDLWPNSVYTYKIGHMLLNGTYIWTRMFQFRASPYPGQNSVQRVVIYGD LGKDEVDG  
SSEYNNFQRGSLNTTKQLIKDLKNTDIVFHIGDICYANGYLSQWDQFTSQIEPIASTVPY  
MIASGNHERDWPGTGSFYQNMDSGGEGLAETMFYVPTENRAKFWDMYEGVVT TIRSPA  
GETNEFPITGRLSQQQGRLMRMWPIGLRRDGVSGEVR LGYCAISEYPLDLKDRMKKKDSC  
SLPHLIGLKAWPGLVWYSTDYGMFKFCIADTEQDWREGSEQYV FIEHCLASVDRLKQPWL  
IFLAHRVLGYSSDANYALEGSFAEPMGRDSLQKLWQKYKVDIAMFGHVHNYERTCPIYQN  
ICTNKEKHYYKGPLNGTIHV VAGGAGASLSPFTTIQTHWSIFRDFDYGFVKLTAFDHSNL  
LFEYKSRDGNVYDSFRISRDYRDILACTVDSCPSSTLAS\*

>CSA006536.1 CSA006536 Sc0000663:233422-236241(-)

MANVHDAVVRLLVALLVVTLLSGPICIFGKQSQSALRFDRNGEFRILQVADMHYGDGKTT  
PCEDVLPGQVRGCSDLNTTAF LKRMILAFNPHLIVFTGDNIFASDATDAASSMNAGFAPA  
VSANIPWWAVLGNHDQESTLSREGVKKHIVGMKNTLSQLNPPEVHVHIDGFGNYNLEIHGI

EGSSFANKSVLNLYFLDSGDYSTVPSIPGYGWIKPSQQFWFQRTSMKLRRAYMKNKPEAQK  
APAPGLVYFHIPLPEYASFDSSNFTGVKQESISSPSVNSGFFTTMVEAGDVKAVFTGHDH  
VNDFCGELTGIHLGYAGGFGYHAYGKAGWARRARVVASMEKTEKGGWGAVKSIKTWKHL  
DDEKLTTIEGQVLWSKSSVGNASSLVP\*

>CSA006537.1 CSA006537 Sc0000663:239793-242521(-)  
MCCKYLLGWNAGDNIFGFDATDAASSMNTAFAPAVLANIPWVAILGNHDQESTLSREGVM  
KHIVGLKNTLSQLNPPEVHVIDGFGNYNLEIHGIEGSTFANKSVLNLYFLDSGDYSTVPS  
IPGYGWIKPSQQFWFQRTSMKLRRAYMKNKPEAQKAPAPGLVYFHIPLPEYASFDSSNFTG  
VKQENISSPSVNSGFFTTMVEAGDVKAVFTGHDHVNDFCGELTGIHLGYAGGFGYHAYGK  
AGWARRARVVASMEKTEKGGWGAVKSIKTWKHLDDDEKLTTIEGHVLWSKSSVGDRRKKQ  
IGRA\*

>CSA006539.1 CSA006539 Sc0000663:250558-253377(-)  
MANVHEAVVRLVVALLVVTLTLLSGPICIFGKQSQSALRFDRNGEFRILQVADMHYGDGKTT  
PCEDVLPQGVRGCDLNTTAFKRMILAFNPHLIVFTGDNIFASDATDAASSMNAGFAPA  
VSANIPWVAVLGNHDQESTLSREGVKKHIVGMKNTLSQLNPPEVHVIDGFGNYNLEIHGI  
EGSSFANKSVLNLYFLDSGDYSTVPSIPRYGWIKPSQQLWFQRTSMKLRRAYMSKPEAQK  
APAPGLVYFHIPLPEYSSFDSSNFTGVKQENISSPSVNSGFFTTMVEAGDVKAVFTGHDH  
VNDFCGELTGIHLGYAGGFGYHAYGKAGWARRARVVASMEKTEKGGWGTVKSIKTWKHL  
DDEKLTAIEGQVLWSKSSVGNASSLVP\*

>CSA008696.1 CSA008696 Sc0000340:249354-252365(-)  
MVPKWVCAGFVYLLGLILNVAEFCNGGMTSGYQRPNNLSFDMPLDSDVFRVPPGYNAPQ  
QVHITQGDYEGRGVVISWITPDEPGSNTVVYWAENTELKNCADGIVVTYKYFDYTSGFH  
HCTIKDLEFDTKYYYEVGIGNTRQFWFITPPKVGPDVPYTFGLIGDLGQTYDSNTTLTH  
YELNPAKGQALLFVGDLSYADDYPFHDNNRWDTWGRFIERNAAHQPWIWTAGNHEIDFAP  
AIGESIPFKPYTHRFVPEASESTSPLWYSIKRASAYIIVMSSYSAFGKYTPQYKWFTN  
KVTEVNRTETPWLIVLMHPPMYNSYVSHYMEGETMRVMYEPWFVEYKVDVVFAGHVHAYE  
RSERVSNAVYNIINGLCTPVNNHSAPVYITIGDGGNQEGLSTAMTQPQPHYSAYREASFG  
HGIFDIKNRTHAYFSWHRNQDGYAIEADSQWFHNRVWKSSEESSVASSR\*

>CSA011989.1 CSA011989 Sc0000525:77490-80649(+)  
MLLPLSCLDKGLQPNTIYYRCGDPSPMGAMSEVFSFKTMPIHGPKIYPKRIAVVGDGLGT  
YNTTSTVEHMIQNDPNLILMTGDATYADLYLTNGTGADCYFCAFGHTPIHETYQPRWDYW  
GRYMQRVAVKVPIMMIEGNHDVEEQGGDVQFASYSSRFAYPSKESGSKSTFILRFPSSFFV  
AAVQYKWLKKDLAKVDREVPWLVASWHAPWYNSYKAHYREAECMMIEMEELLYKNGVDL  
VFNGHVHAYERSNRVYNYTLDPCGPVYITIGDGGNREDRAIPFADEPGSCPSPSSRLGNC  
ATNFTSGPAAGKFCWDRQPDFSAYRESSFGHGILEVKNETHALWTWHRNQDMYNEIGDQI

YIVRQPDKCLVKPKPTKELGCWSQVTWEDVKREGFKHG\*

>CSA018804.1 CSA018804 Sc0001074:222761-234424(+)  
RLKELSYDDSSSTCPPDNSRQQAPYICSAPIKYKYANESSDYTKTGNASLKFILINQRA  
DFSGLFTGGLSNMTVTWTSGYNIDEAVPFVEWGFKEHQTSQSPAGTLTFHRNSMCGSPA  
RTVGWRDPGFIHTSFLKELWPNSVYTYKLGHRLFNGSYIWSKVYSFKSSPYPGQDSLQRI  
IVFGDMGKAERDGSNEYSNYQPGSLNTTDQLIKDLNFDIVFHIGDLPYANGYISQWDQF  
TSMVEPIASTVPYMIASGNHERDTPGTGSFYDTNDSGGEGCVLAETMFYVPAENRAKFWV  
WDSKSVILDVRSSRVGLVMDVWSVDGVAIVGVKMTVTWTSGYNINEAVPFVEWGFKEHQ  
TQSPAGTLTFHRNSMCGSPARTVGWRDPGFIHTSFLKELWPNSVYTYKLGHRLFNYIWSK  
VYSFKSSPYPGQDSLQHVVFVFGDMGKAERDGSNEYNNYQPGSLNTTDQLIKDLNIDIVF  
HIGDLSYAKGYISQWDQFTSMVEPIASTVPYMIASGNHERDTPGTGSFYDTNDSGGEGCV  
LAETMFYVPAENRAKFWYSTDYGMFHFICADTEHDWREGTEQYKFIEHCLASADRQKQPW  
LIFAAHRVLGYSSNKYYALEGSFEPMGRESLQKLWQKYKVDIAFFGHVHNYERICPIYQ  
NQCVENTEKSHYSGTVNGTIHVVVGGGGSHLSEFSSLQTRWSLYRDYDFGFVKLTAFNHSS  
LLFEYKSSDGKVYDSFTISRDRDLACVHDGCEPTLAT\*

>CSA019400.1 CSA019400 Sc0001483:375243-377024(-)  
MGIIGEKLDIDFVISTGDNFYEDGLMGINDPAFYDSFSNIYTAPSLQKTWYSVLGNHDYR  
GDVEAQMSPIREKDKRWVCMRSFILNADIVEFFVDTTPFVDKYFTDPGDNVYDWKGV  
PRKNYLSNLLNDVDLALKSSSAIWKIVVGHHITKSAGQHGITEELVNNLLPILQENNVHV  
YMNHGDHCHLEHISCSKSKIEFLTSGGGSKAWRGNVKEWNPEEMKFYYDGQGFMSVQLDEA  
KANFIYYDVFGVLELHKFMVSKEFHSTS\*

>CSA021776.1 CSA021776 Sc0000211:481949-485198(+)  
MRLTWVSGDKEPQQVQYGGGKSQTSQVTTFS PDNMCSSSILPSPAKDFGWHDPGYIHS  
MTGLKPSSTFSYRYGSNSVGWSDQIQFTT PAVGGSDELRLAFLGDMGKAPRDASVEHYIQ  
PGSLSVTKAMASEVASGNVDSIFHIGDISYATGFLVEWDFLHLISPVASQVSYMTAIGN  
HERDYVDSGSVYTTPDSGGEGVPYETYFPMPTPAKDKPWYSIEQGPVHFTVISTEHDWS  
QNSEQYDWMNKMASVDRSKTPWIIFAGHRPMYSSSSGILPSVDNNFVQAVEPLLLANKV  
DLVLFHGHVHNYERTCAVYQNECKAMPKKDGHGIDTYDNTNYSAPVQVVIGMAGFTLDKSP  
ASADSWSLTRISEFGYVRVHATRQDLTFKYVNANTRKVEDSFRITKS\*

>CSA026817.1 CSA026817 Sc0001926:105169-108133(-)  
MLFLQYKYATAASSGYTKTGKTIHFQLINQRSDFSALFSGGLSNPKLVAINPITFAN  
PKAPLYPRIAQGKSWDMVTWTWTSGYNIDEAVPLVEWGFKGGNQIRSPAGTLRIHQSSMC

GGPARTVGWRDMGFIHTSYLKDLWPNTMYTYKMGHQLANGSIDWSKMYSFKSSPFIGQDS  
LQRVIIFGDMGKVVPNPKEQKGKEKQENGERDGSNEYSNYQPGSLNTTDQLIKDLNNYD  
MVLHIGDIVVSYNGYTSQWDQFTSQIEPIASTKPYMIASGNHERDWPGTGSFYDTMDSGGE  
CGVLAETMFYVPAENRAKYSTDYGMFHFICIADSEHDWREGTEQYKFIEHCLASADRKKQP  
WLIFIAHRVLGYSSDKFYGLEGSFEPMGRESLQKLWQKYKVDMAFYGHVHNYERSCPVY  
QSRCVTSDTSHFSGPVQGTIHVVVGGGGSHLSQFSELNTHWSLYKDYDWGFVKLTAFNHS  
ALLFEYKKS RDGKVYDSFTISRDKV LACVHDSCPHVTLAT\*

>CSA027593.1 CSA027593 Sc0002467:157423-166705(-)  
MGHFPSQRFILTFMSCSFFFFFYCVNSTSIFSATHLRGGSGEQPLSKIAIHNAVFAI  
HSSASITASPFLGKHGEDSQSITVKLKCPNPSEDDWVGVFSPANFNSSTCPPDNSRQQA  
PYICSAPIKYKYANESSSDYTKGNASLKFILINQRADFSFGLFTGGLSNPKLVAVSNVI  
TFSNPKAPLYPRLAQGKSWNEMTVTWTSGYNIDEAVPFVEWGFKEHQTQSPAGTLTFHR  
NSMCGSPARTVGWRDPGFIHTSFLKELWPNSVYTYKLGHRLFNGSYIWSKVYSFKSSPYP  
GQDSLQRIIVFGDMGKAERDGSNEYSNYQPGSLNTTDQLIKDLNFDIVFHIGDLPYANG  
YISQWDQFTSMVEPIASTVPYMIASGNHERDTPGTGSFYDTNDSGGEGCVLAETMFYVPA  
ENRAKFWYSTDYGMFHFICIADTEHDWREGTEQYKFIEHCLASADRQKQPWLIFAAHRVLG  
YSSNKYYALEGSFEPMGRESLQKLWQKYKVDIAFYGHVHNYERICPIYQNCVNTKESH  
YSGTVNGTIHVVVGGGGSHLSEFSSLQTPWSLYRDYDFGFVKLTAFNHSSLLFEYKKSSD  
GKVYDSFTISRDRDVLACVHDGCEPTLAT\*

>CSA028799.1 CSA028799 Sc0002450:127167-130541(+)  
MGLVRFFLGSALGLVGLFVNAVVL CNGGTTSAFVRQVEKTVDMPLESDVFHVPPGHNA PQ  
QVHITQGDHEGKGLIVSWVTMDDPGSSTVLYWSENSKHKNKAKGTVVYTKFYNYTSGYIH  
HCTIKNLEFDTKYYYEVGIGHTTRTFWFTTPPEVGPDPVPTYFGLIGDLGQSYDSNMTLTH  
YALNPTKGKTM LFMGDL SYADNYPNHDNVRWDTWGRFTERSAAYQPWIW TAGNHEIDFAP  
EIGETKPFKPYTHRYRVPYKASNSTAPFWYSIKRASAYIIVLSSYSAYGKYTPQYKWLEA  
ELPKVSRSETPWLVLMHAPWYNSNYHYMEGETMRVMYEPWFVKYKVDVVFAGHVHAYE  
RSAL\*

>CSA030189.1 CSA030189 xpSc0053256:290822-293152(-)  
MATMWFWLMTCVTSTFVRKEWSTDMPESFPFPPPGTNAPEQVHITQGDHEGRSMIISWVT  
PVEKYPNVVYWEAGTKDLHLKLQTHSEITTYRYNYASGYIHHATIKDLKFDTKYFYEVA  
SNEVTRQFSFTTPPKPGDPVPTYFGVIGDLGQTDSXPYTFGVIGDLGQTEDSNRTLEHY  
MSNPIKGQAVLFAGDLSYADDHPNHDNTKWDTFGRFIEKSVAYQPWIWSAGNHEIDLASN  
LEETDPFKPYLHRYVVPYKASQSTSPLWYSIKRASTYIIVLSSYSAYGKYTPQYKWLEQE  
LPKINRYETPWVIVILHAPWYNSNYHYMEGESMRVQFEPWFVQYKVDIVFAGHVHYSYER  
SERISNIKYNITNGLSLPVRDINAPVYITIGDGGNIEGIANK\*

>CSA030190.1 CSA030190    xpSc0053256:310322-313230(-)  
MAIIWFWLMTCVLLHIAVLCNAGVTSGFVRKAAWSVDIPKSHFPPPSGTNAPEQVHITQG  
DHEGRGMIISWVTPVDRYPNVVITYWEADTEHEHNKHKHYHKHKTHSTITTYRYYDYSSGY  
IHATIKHLKFDTKYFYEVASHNVTRRFSFTTPPKPGPDVPYTFGVIGDLGQTADSNQTL  
EHYVSNPIKGQAVLFAGDLSYADDHPNHDNTKWDTFGRFIEKSVAYQPWIWSAGNHEIDF  
APNLGESVPFKPYLHRYHVPYKASQSTSPLWYSIKRASTYIIVLSSYSAYGKYTPQYKWL  
EQELPKINRSETPWIIVILHAPWYNSNHYYHMEGESMRVQFEPWFVQHKVDIVFAGHVHS  
YERSERISNVKYNITNGLSGPVRDSSAPVYITIGDGGNIEGIADNFIDQQPSYSAYREAS  
FGHAILEIKNRTHAYYTWHRNQDNEPVIADSAWFFNRFWYPEDESSINNKEA\*

>CSA031017.1 CSA031017    xpSc0053660:137781-142512(-)  
MTIVLSWEGLNPQPAHSIQMASMRSEADDWRRIRSIVKGLVSDSPLTYPMSMDLLRLLFWN  
CRGASNNNFKSNLTEIIRTHKPEILVLETKVPFSKIGNFFNRLGSTASTIVDLGGRDTS  
QVTVRASSATSQAIHATIHKADYDEWVLAAYANPSPVMRDQLWDNLEDVAGTMGKPWL  
AGDFNDFATQGERKSFTSRNSTIRNQKFLDRVNNCNLMDLGSPGPSMTWTNNQKGLANTM  
ERLDRAMCNSEWRMTMFPEATVRILPRTYSDHSPLLVTQGMHQLNPLNRPFRFEATWMTH  
PGLIDVINSSWTSMNHNLDSTTVFTCKVKEWNRELVLGFVWLNNWIKLNLIWVLSQREE  
SLVCLDLGFGEVHITQGDHVGKAVIVSWVTMEEAGSSTVLYWSENSKNKNKAKGTVGRYK  
FYSYTSGHIHCTIKNLEFDTKYEEVGIGHTARTFWFTTPPEVGPDPYPTFGLIGDLGQ  
SYDSNKTLTTHYESNPTKGKTVLFVGDLSYADTYPNHDNERWDTWGRFVERSTAYQPWIWT  
AGNHEIDFAPDLGETKPFKPFTHRYHVPYKASNSVAPFWYSIKRASAYIIVLSSYSAYGK  
YTPQYQWLLAELLKVNRETPWLIVLLHAPWYNSNYHMEGETMRVMFEPWFVQHKVDV  
VFAGHVHAYERSERSVNIAYNVVNGICSPVKDQSAPVYITIGDGGNLEGLATNMTEPQPK  
YSAFREASFGHAIFDIKNRTHAYYSWHRNQDGNAVEADSLWFFNRIWHQVDDSTSTH\*

>CSA034553.1 CSA034553    Sc0004847:59920-70900(-)  
MILIVQLVHPGQRPGPPIKARIPLGSGPGSGLNFLTGRGPGLPMAGPTHLEFWREPERSDIG  
HPSPGPPELQRLEHHGKSDESLSFLVIGDWGRGGLYNQSEIAFQMGRIGEKLDIDFVISTG  
DNFYDNGLKGVNDPAFQESFTKIYSQKSLQKPWYSILGNHDYRGDAKAQLNPMLRKIDSR  
WICLRSFTLNTGSADFFMDTTPFVDVYFTDPEERVYDWRGIYPREIYLNLLKDLSAL  
RNSTAEWKIVVGHHAIRSISHHGDTELEIDQLLPVLEMNGVDFYVNGHDHCLQRISCPDN  
RIQFLTSGAGSKAWRGDDKKHKCAVHFFYDGGQGFMSMLKSTEAKMVFYDVFGQPIHQW  
SVSRMLHSEM\*

>CSA036115.1 CSA036115    Sc0001836:97465-106048(-)  
MEFCKMGIASIVFFIFLDMVVIAQTIPTTLQGPFPTVTHSMDPSLRLGSDDLPMDNPRLK  
RNVTAMFPEQIALALSSSSSMWVSWVTGTGLNWD SQIGLNV TALDPSTVASEVWYGKETG  
DYSMKRNGVSTVYSQLYPYEGLWNYTSGIIHHVKIDGLEPETKYKYKCGDSSLPAMSDEQ  
VFETLPLPGPNRYPRRIAVIGDLGLTSNTTTIDHLENDPSIVLMVGDLYANQYQTTG  
GKGASCFSCAFPNAPIRETYQPRWDAWGRFMEPLTSRVPMMVIEGNHEIETQAAGISFQS

YLTRFAVPSNESGSNSNFYYSFDAGGAHFIMLGAYVDYNSTGTQYAWLKEDLSKIDRSVT  
PWLVAAWHSPWYNSYSSHYQEFECMRQQMEALLYQYGVDIVLSGHVHAYERMNRVYNYML  
DPCGPVYITVGDGGNIEKVDVDHADDPGKCPSAGDNMPEFGGVCHLNFSSGPAKGNFCWD  
KQPEWSAYRESSFGHGILEVHAYERMNRVYNYMLDPCGPVYITVGDGGNTEKVDVDHADD  
PGKCPSAGDNVPEFGGVCHLNFSSGPAKGNFCWDKQPEWSAYRESSFGHGILEVNSTYA  
LWTWHRNQDIYKENSSGDQIYVRQPQSCSVPSKNSEITSSPPMDSAAPSPPAMDAVAGF  
GVHLSGAFITYFLFLIFMPLHWL\*
