# Supplementary material for: Identification of Tea Plant Purple Acid Phosphatase Genes and Their Expression Responses to Excess Iron
Source: Int J Mol Sci. 2019 Apr 21;20(8):1954. doi: 10.3390/ijms20081954 (PMC6515233; doi:10.3390/ijms20081954)
Supplement: Supplementary file 1 [file ijms-20-01954-s001.zip › Table S2.xlsx]

## Sheet: Sheet1
Supplementary Table 4. Read processing and mapping statistics of our RNA-seq data.
Sample name	Control-root_repeat1	Control-root_repeat2	Control-root_repeat3	Control-leaf_repeat1	Control-leaf_repeat2	Control-leaf_repeat3	High Fe-leaf_repeat1	High Fe-leaf_repeat2	High Fe-leaf_repeat3
Total reads	71680796	67767502	70699684	54809926	53375914	61554882	57730066	64504952	57811778
Total mapped	49189169 (68.62%)	44961930 (66.35%)	48845086 (69.09%)	46018630 (83.96%)	44659565 (83.67%)	51315932 (83.37%)	48206728 (83.5%)	53732278 (83.3%)	48174668 (83.33%)
Multiple mapped	1796648 (2.51%)	1611132 (2.38%)	1784543 (2.52%)	1519645 (2.77%)	1506542 (2.82%)	1605862 (2.61%)	1633043 (2.83%)	1840029 (2.85%)	1611665 (2.79%)
Uniquely mapped	47392521 (66.12%)	43350798 (63.97%)	47060543 (66.56%)	44498985 (81.19%)	43153023 (80.85%)	49710070 (80.76%)	46573685 (80.67%)	51892249 (80.45%)	46563003 (80.54%)
Read-1	23917210 (33.37%)	21865290 (32.27%)	23750253 (33.59%)	22332526 (40.75%)	21660316 (40.58%)	24947673 (40.53%)	23361546 (40.47%)	26051583 (40.39%)	23375828 (40.43%)
Read-2	23475311 (32.75%)	21485508 (31.7%)	23310290 (32.97%)	22166459 (40.44%)	21492707 (40.27%)	24762397 (40.23%)	23212139 (40.21%)	25840666 (40.06%)	23187175 (40.11%)
Reads map to '+'	23674804 (33.03%)	21656379 (31.96%)	23509432 (33.25%)	22222429 (40.54%)	21557868 (40.39%)	24825549 (40.33%)	23258627 (40.29%)	25913356 (40.17%)	23250761 (40.22%)
Reads map to '-'	23717717 (33.09%)	21694419 (32.01%)	23551111 (33.31%)	22276556 (40.64%)	21595155 (40.46%)	24884521 (40.43%)	23315058 (40.39%)	25978893 (40.27%)	23312242 (40.32%)
Non-splice reads	29755094 (41.51%)	27923395 (41.2%)	29539242 (41.78%)	28098678 (51.27%)	26658520 (49.94%)	31868657 (51.77%)	28985941 (50.21%)	32745456 (50.76%)	29626566 (51.25%)
Splice reads	17637427 (24.61%)	15427403 (22.77%)	17521301 (24.78%)	16400307 (29.92%)	16494503 (30.9%)	17841413 (28.98%)	17587744 (30.47%)	19146793 (29.68%)	16936437 (29.3%)
