# Supplementary material for: Identification of Tea Plant Purple Acid Phosphatase Genes and Their Expression Responses to Excess Iron
Source: Int J Mol Sci. 2019 Apr 21;20(8):1954. doi: 10.3390/ijms20081954 (PMC6515233; doi:10.3390/ijms20081954)
Supplement: Supplementary file 1 [file ijms-20-01954-s001.zip › Table S3.pdf]

Supplementary Table 3. CsFER1 cDNA sequence

5'-CTAATACGACTCACTATAGGGCAAGCAGTGGTATCAACGACGAGTACATGCGGGGATAACCTTGA  
CACCTCCATTGATCATTTTAGCTAAGTCTGCCCTTAATTCAAACCTCCATATTCTTGTAATCTC  
TCTCTCTCTCTCTCTCTCTCTCTTCTCTATAAATCATGTTTCCGCAGGCAACTTGTCCGGCTGTTT  
CTCTCTCTTCCATGCACGGGGTTAGTCTTAGACTTGGACTACCCTTATCATCACATCCTAGCTTC  
AGCTCACCTTCCTCATCATCTGTTACGAGTTTTTGGGGACAAAAAGAGGGGTATGGGTTTCGTTGT  
CTCGGCTTCAACGGAGACTAGTTTGGCGCAGACAGGTGTGATCTTCAAACCATTTGAAGAGGTCA  
AGAAAGAAGATTTTCATGATCCCTATCTCCCGCCAGATTTTCGCTTGCTCGCCAGAGGTACCAAGAT  
GAGTGCGAAGCTGCGATCAACGAACAGATCAATGTGGAATACAATGTGTCGATGTTTATCACGC  
CATGTACGCATACTTCGACAGGGACAATGTCGCTCTCAAGGGCCTTGCAAAATTTTTCAAGGAGT  
CAAGTGATGAAGAAAGAGAACATGCTGAGAAATTTATGAAATACCAGAACATACGCGGAGGAAGA  
GTTAAGCTACACTCTATACTGGCGACCCCTTCTGAATTTGAACATGCTGAGAAGGGTGATGCTTT  
GTATGCAATGGAAGTAGCACTGTCCTTGGAGAAGTTGACAAATGAGAACTTCTGAGCTTGCATG  
GTGTGGCTGCTCAAAACAATGATCCTCAAATGACTGAGTTTATTGAGCGTGAATTTCTAGCTGAG  
CAGGTGGAAGCAATTAAGAAAATTGCAGACTTTGTCACTCAGTTGAGACTGGTTGGGAAAGGACA  
TGGGGTGTGGCACTTTGATCAGAAGCTCCTACACGAGGGTGATGGTGTTTTTTGAAGATTTCCAT  
CCATGTTTTCTTTTTTCGGTTAGAGTCTATGTTCCATAAAACCTACGGTGTGATGATTTACAACT  
TTTGTGTTAATATTCAGATGAATGAACAAATCAACTCAAACCCAAAAGAAGTAACTTTGTTATT  
GTGGAACACAAATAAATGTAATATAAAGTGGGTGTTTGAGAAAAAAAAAAGTAAAAAAAAAAAAA  
AAAAAAAAAAAAAAGTACTCTGCGTTGATACCACTGCTT-3'
